# Supplementary material for: Heterogeneous Distribution of Interlayer Cations and Iron as a Plausible Explanation of the Non-Exfoliation of Commercial Vermiculites Post Alcohol Treatment and Microwave Irradiation
Source: MDPI journal article supplement (doi:10.3390/min11080835), 2021-08-01
Supplement: s1 [file s1]

Project: Project 1

Owner: INCA

Sample: L4E-MW-No

Type: Default

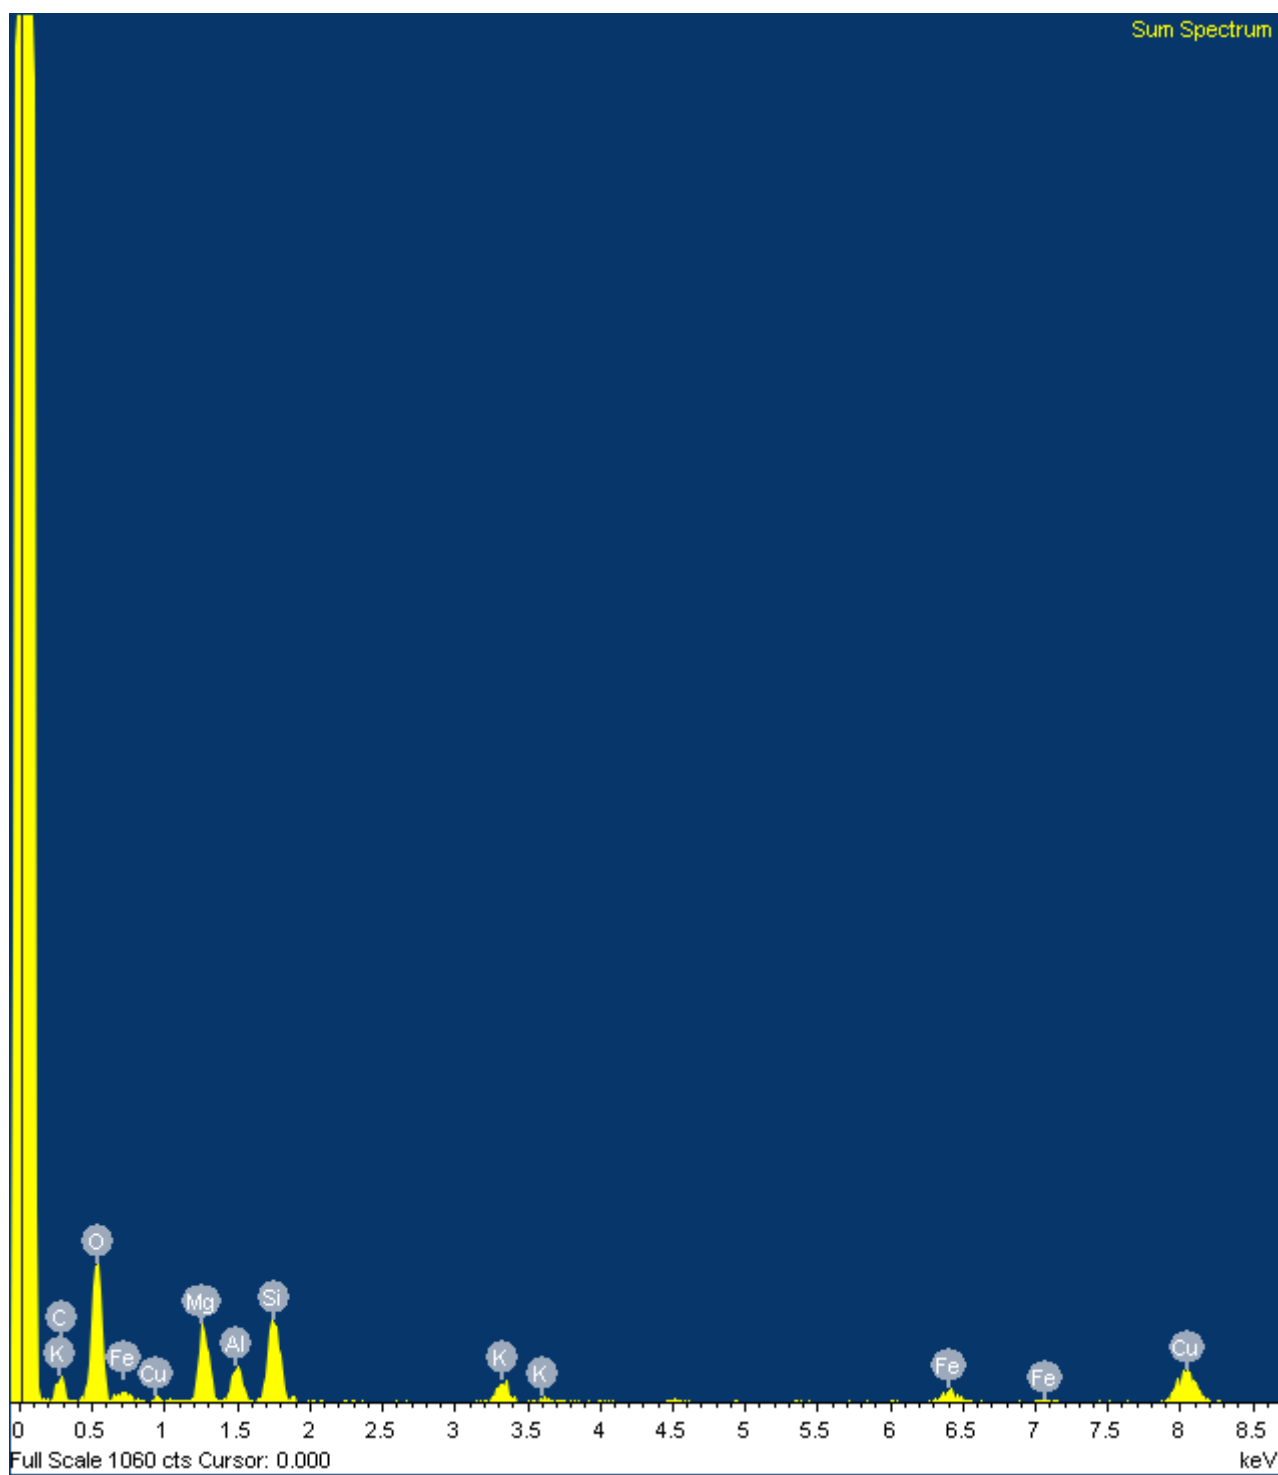

Comment:

Project: Project 1

Owner: INCA

Sample: L4E-MW-No

Type: Default

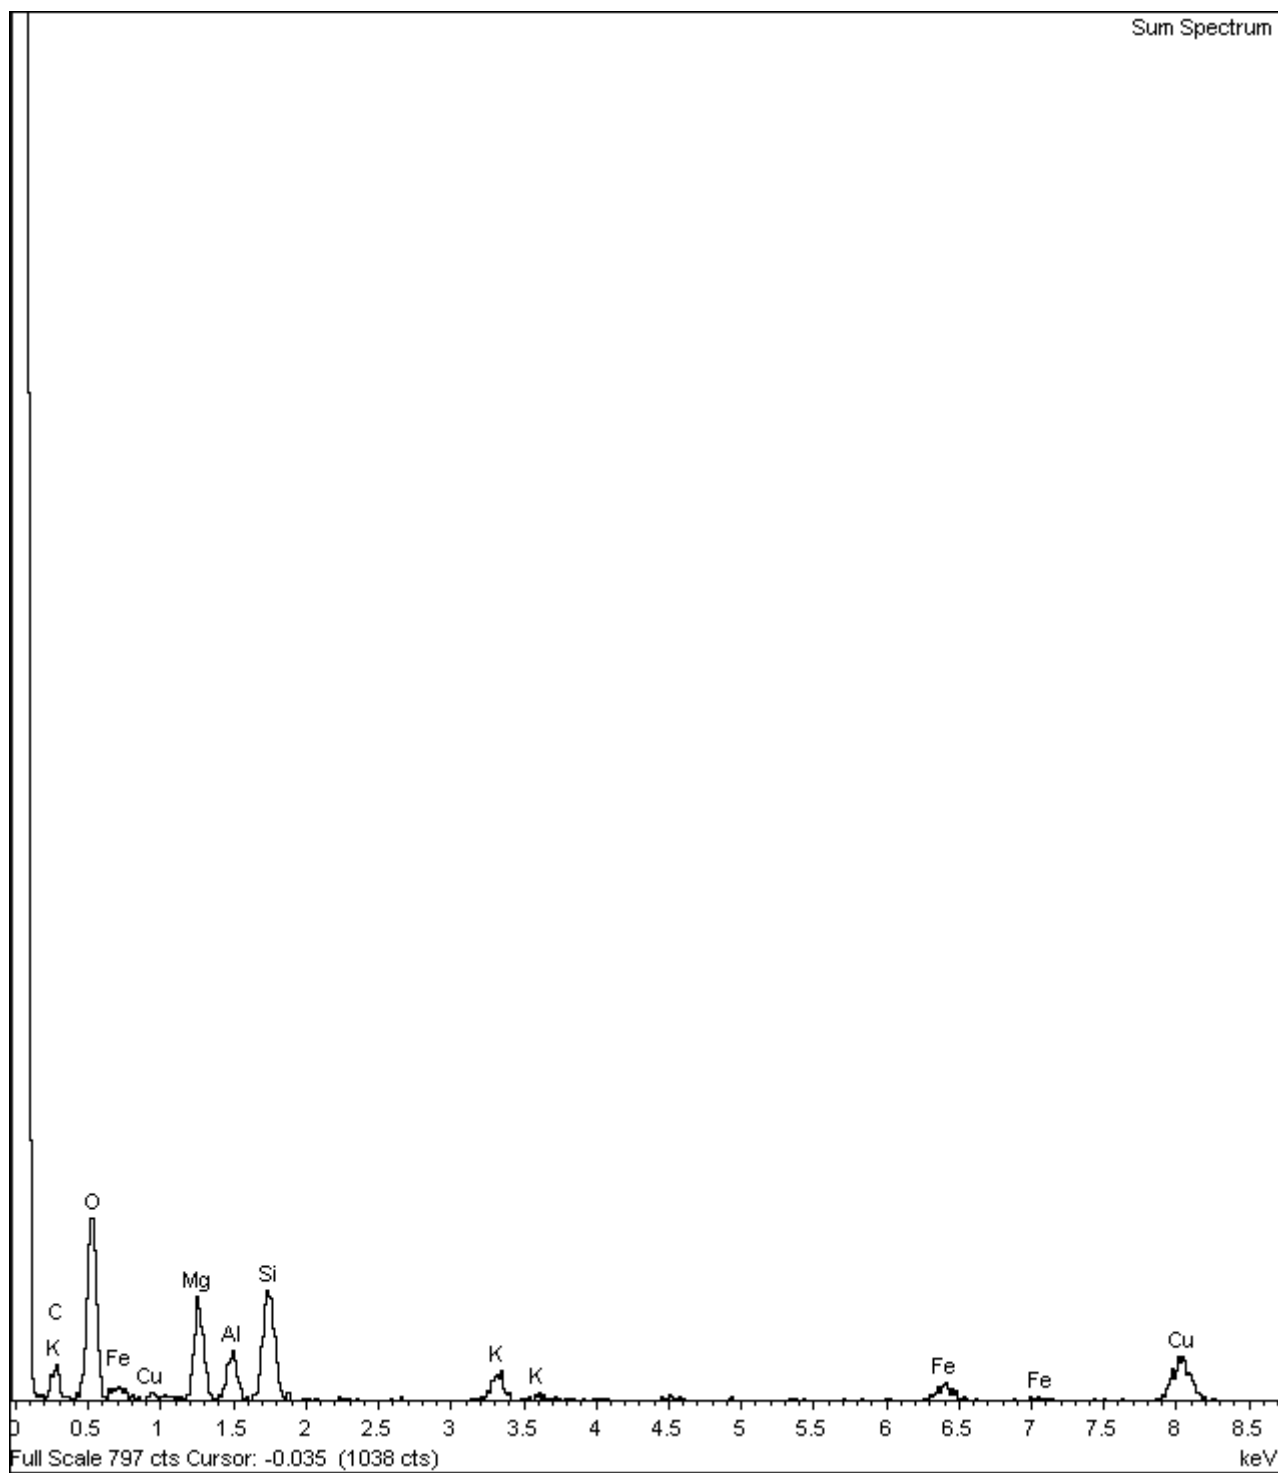

Comment:

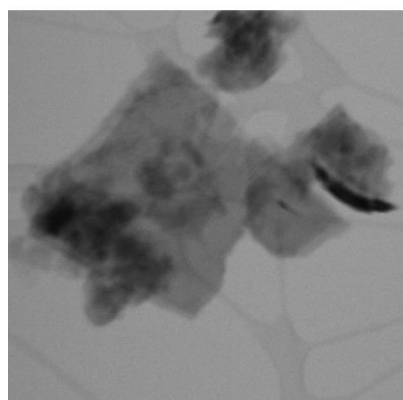

Electron Image 1

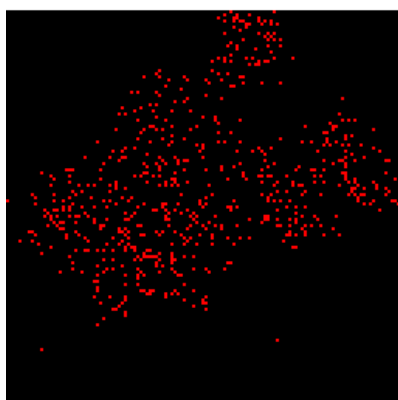

Mg Ka1\_2

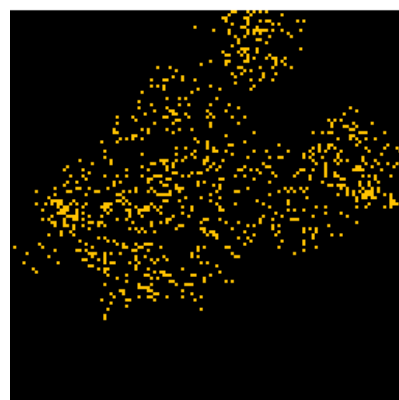

Si Ka1

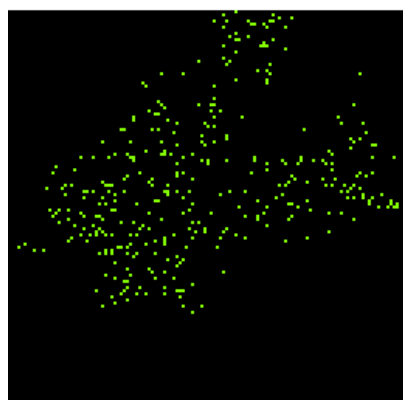

Al Ka1

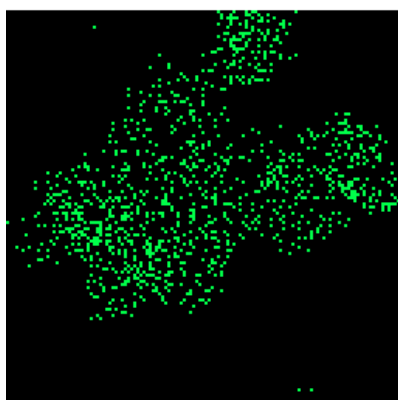

O Ka1

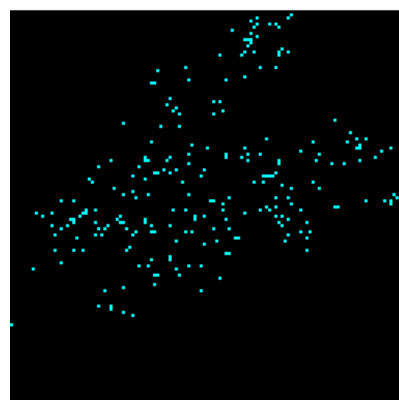

K Ka1

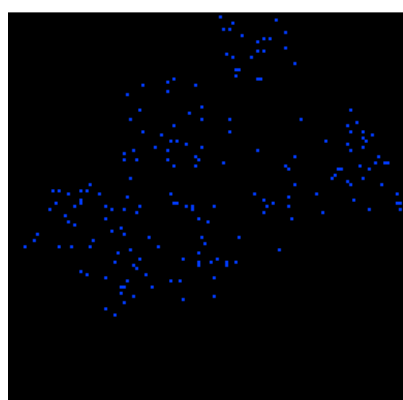

Fe Ka1

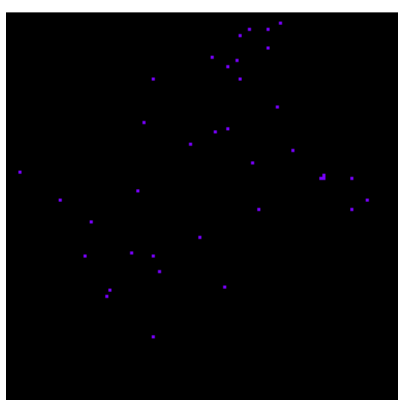

Ca Ka1

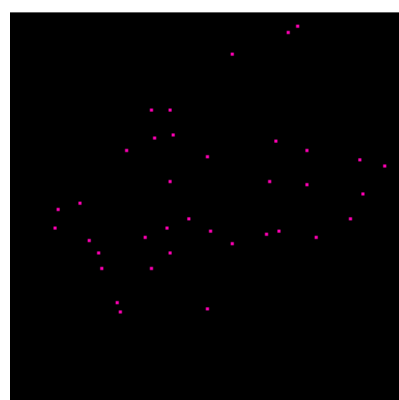

Ti Ka1

Comment:

## Project 1

13/05/2014 12:55:19

Project: Project 1

Owner: INCA

Sample: L4E-MW-No

Type: Default

Label : Sum Spectrum

Collected : 13-May-2014 12:54 PM

Livetime (s) : 465.31

Real time (s) : 0.00

Detector : X-Max

Window : SATW

Tilt (deg) : 0.0

Elevation (deg) : 17.7

Azimuth (deg) : 0.0

Sample thickness: 0.0 nm

Sample density: 0.00 g/cm<sup>3</sup>

Spectrum processing :

Peak possibly omitted : 8.032 keV

Quantitation method : Cliff Lorimer thin ratio section.

Processing option : All elements analyzed (Normalised)

Number of iterations = 1

Standardless

| Element | Peak | Area  | k      | Abs    | Weight% | Weight% | Atomic% |
|---------|------|-------|--------|--------|---------|---------|---------|
|         | Area | Sigma | factor | Corrn. |         | Sigma   |         |
| O K     | 1631 | 77    | 1.065  | 1.000  | 49.08   | 1.45    | 63.61   |

|        |      |    |       |       |        |      |       |
|--------|------|----|-------|-------|--------|------|-------|
| Mg K   | 832  | 50 | 0.606 | 1.000 | 14.24  | 0.84 | 12.15 |
| Al K   | 441  | 40 | 0.589 | 1.000 | 7.34   | 0.65 | 5.64  |
| Si K   | 1138 | 61 | 0.569 | 1.000 | 18.29  | 0.94 | 13.50 |
| K K    | 360  | 33 | 0.552 | 1.000 | 5.61   | 0.51 | 2.98  |
| Ca K   | 28   | 24 | 0.542 | 1.000 | 0.42   | 0.36 | 0.22  |
| Ti K   | 44   | 25 | 0.608 | 1.000 | 0.76   | 0.43 | 0.33  |
| Fe K   | 222  | 29 | 0.678 | 1.000 | 4.26   | 0.54 | 1.58  |
| Totals |      |    |       |       | 100.00 |      |       |

Project: Project 1

Owner: INCA

Sample: L4E-MW-No

Type: Default

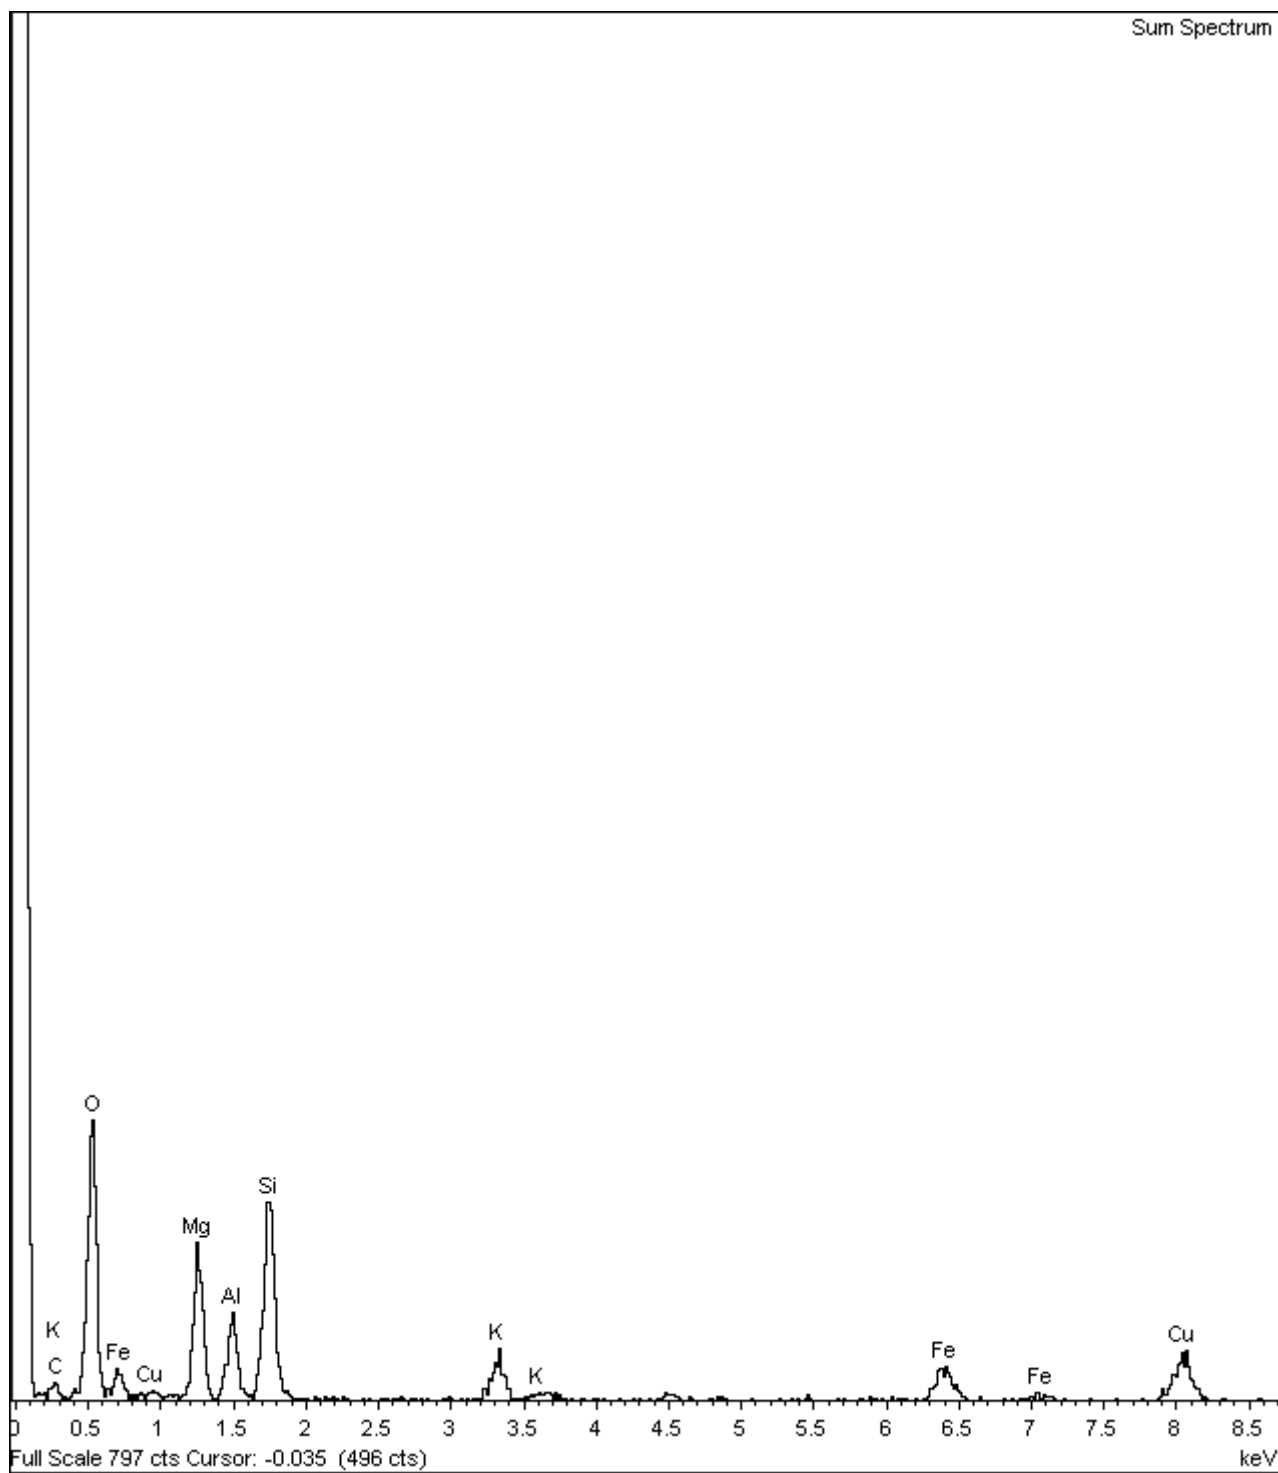

Comment:

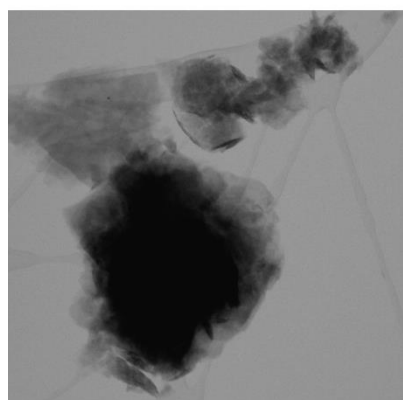

Electron Image 1

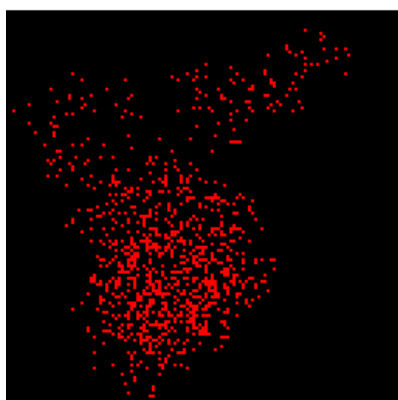

Mg Ka1\_2

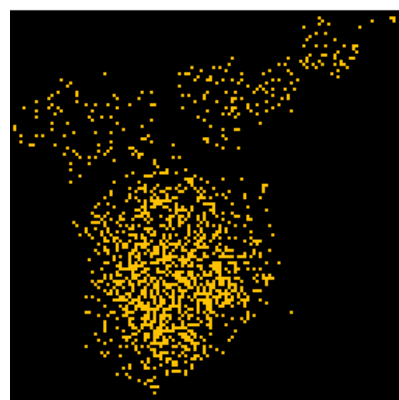

Si Ka1

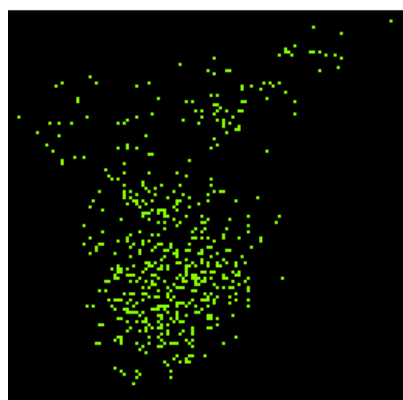

Al Ka1

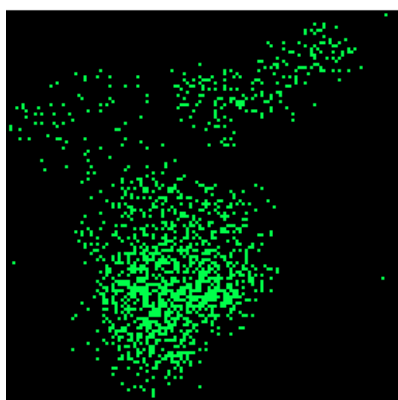

O Ka1

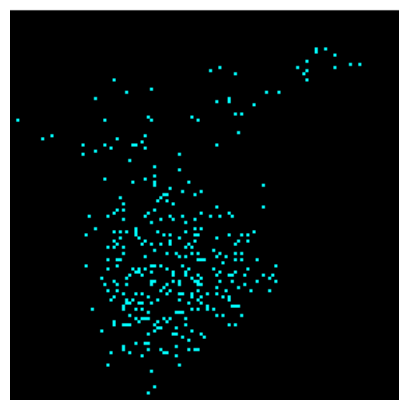

K Ka1

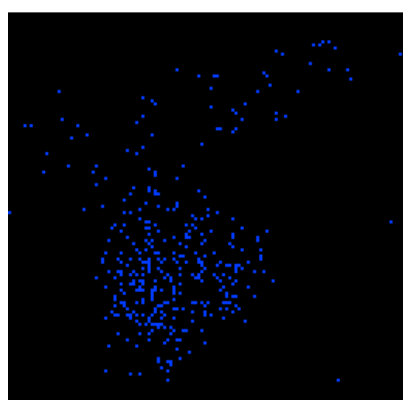

Fe Ka1

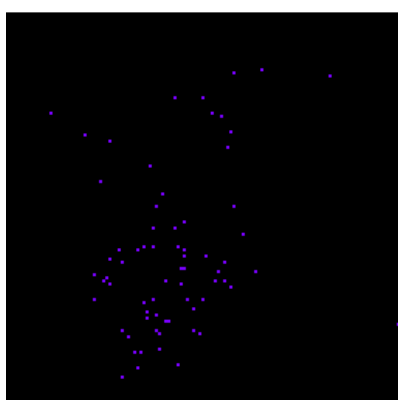

Ca Ka1

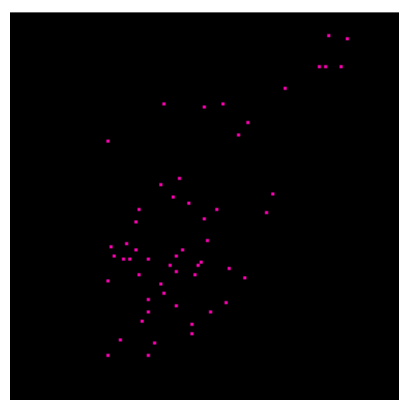

Ti Ka1

Comment:

Project: Project 1

Owner: INCA

Sample: L4E-MW-No

Type: Default

Label : Sum Spectrum

Collected : 13-May-2014 01:03 PM

Livetime (s) : 229.38

Real time (s) : 0.00

Detector : X-Max

Window : SATW

Tilt (deg) : 0.0

Elevation (deg) : 17.7

Azimuth (deg) : 0.0

Sample thickness: 0.0 nm

Sample density: 0.00 g/cm<sup>3</sup>

Spectrum processing :

Peak possibly omitted : 8.039 keV

Quantitation method : Cliff Lorimer thin ratio section.

Processing option : All elements analyzed (Normalised)

Number of iterations = 1

Standardless

| Element | Peak | Area  | k      | Abs   | Weight% | Weight% | Atomic% |
|---------|------|-------|--------|-------|---------|---------|---------|
|         | Area | Sigma | factor | Corn. |         | Sigma   |         |
| O K     | 2360 | 93    | 1.065  | 1.000 | 44.78   | 1.15    | 59.87   |



|        |      |    |       |       |        |      |       |
|--------|------|----|-------|-------|--------|------|-------|
| Mg K   | 1346 | 64 | 0.606 | 1.000 | 14.52  | 0.67 | 12.78 |
| Al K   | 702  | 52 | 0.589 | 1.000 | 7.37   | 0.53 | 5.84  |
| Si K   | 2023 | 79 | 0.569 | 1.000 | 20.51  | 0.77 | 15.62 |
| K K    | 509  | 41 | 0.552 | 1.000 | 5.01   | 0.39 | 2.74  |
| Ca K   | 73   | 22 | 0.542 | 1.000 | 0.71   | 0.21 | 0.38  |
| Ti K   | 74   | 18 | 0.608 | 1.000 | 0.81   | 0.19 | 0.36  |
| Fe K   | 522  | 40 | 0.678 | 1.000 | 6.30   | 0.47 | 2.41  |
| Totals |      |    |       |       | 100.00 |      |       |

Project: Project 1

Owner: INCA

Sample: L4E-MW-No

Type: Default

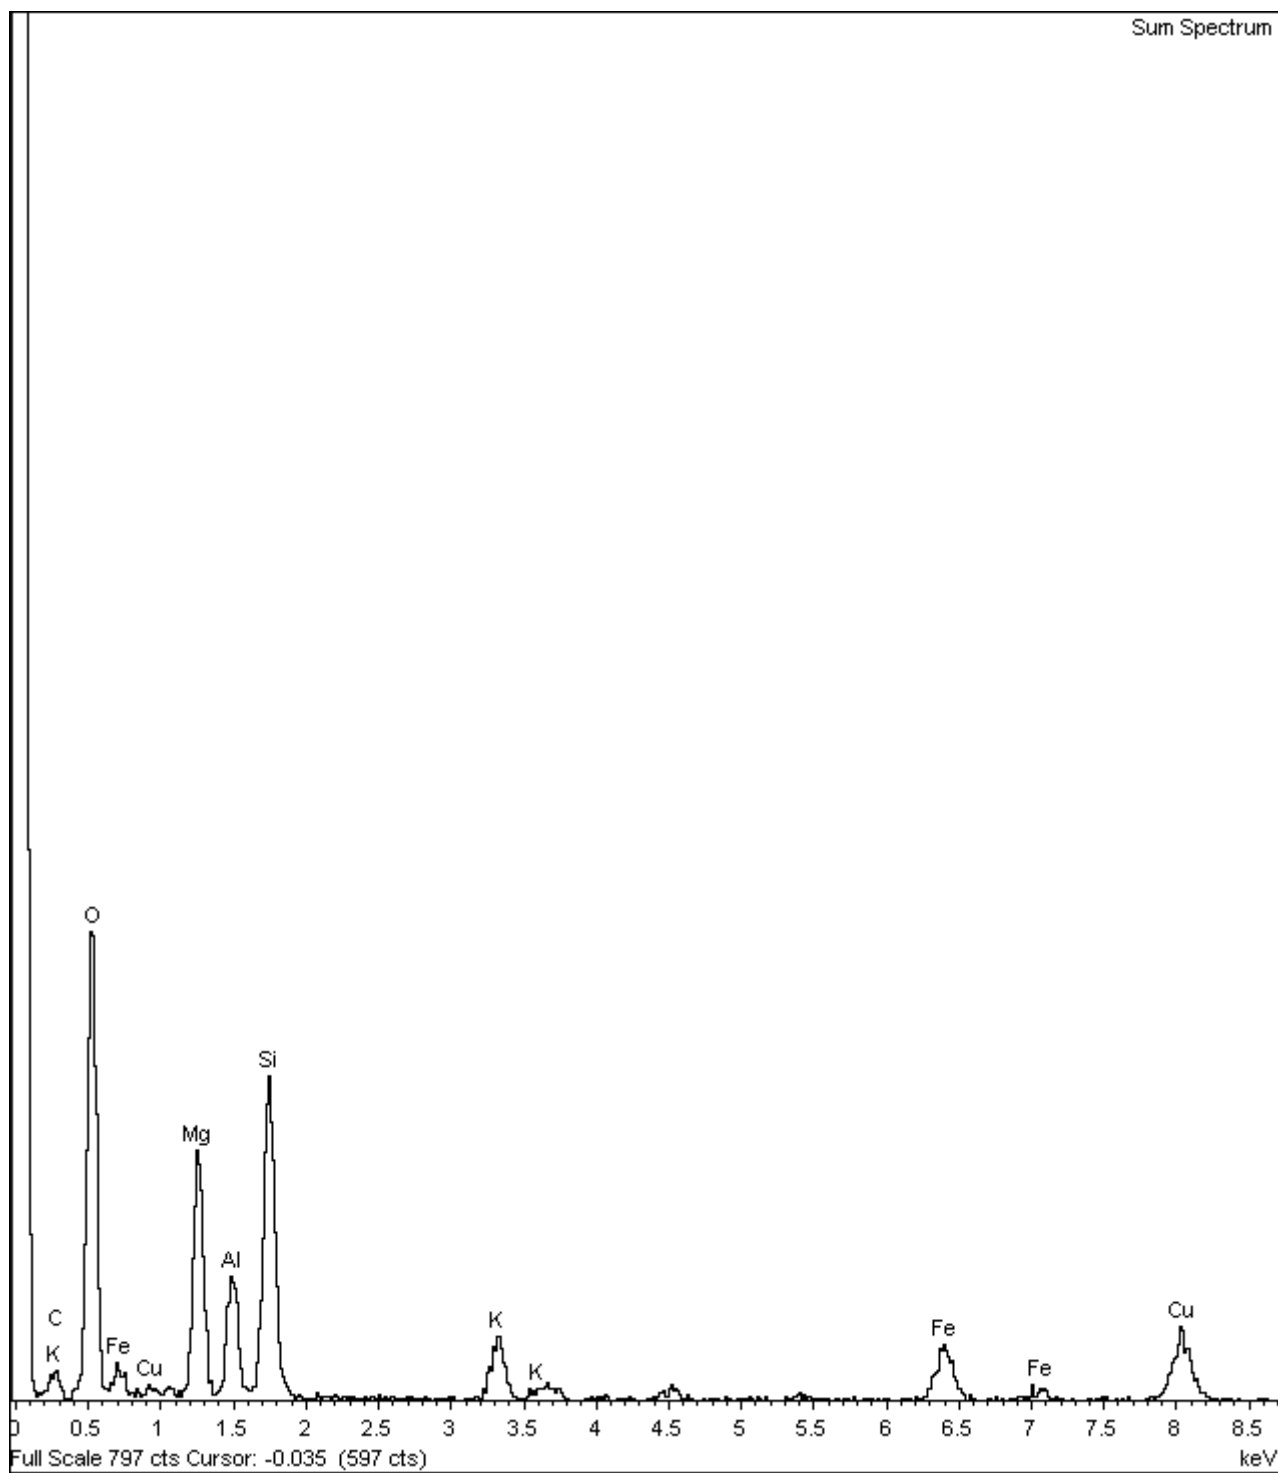

Comment:

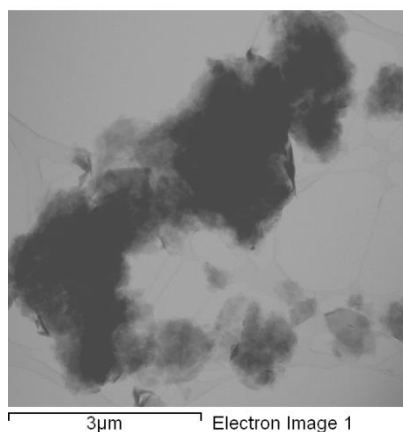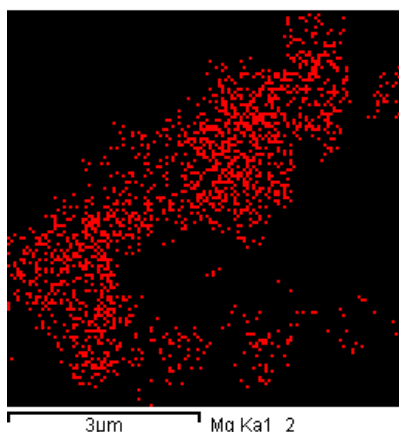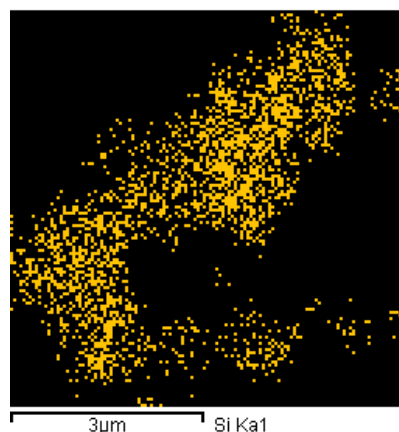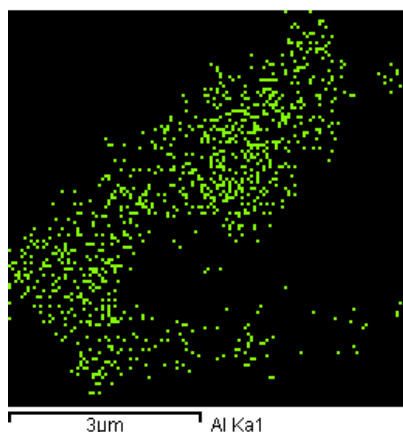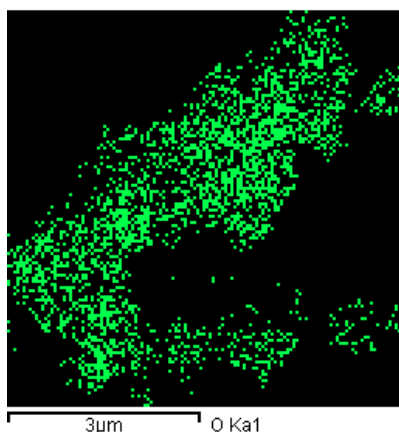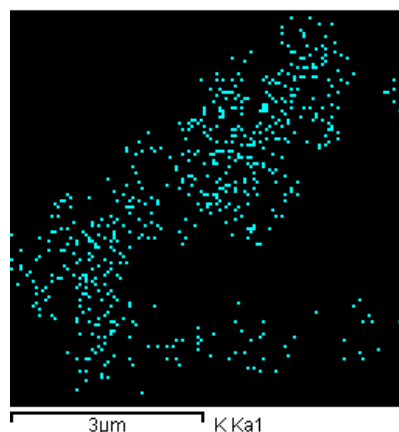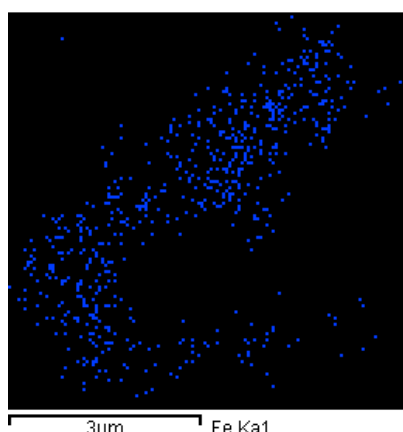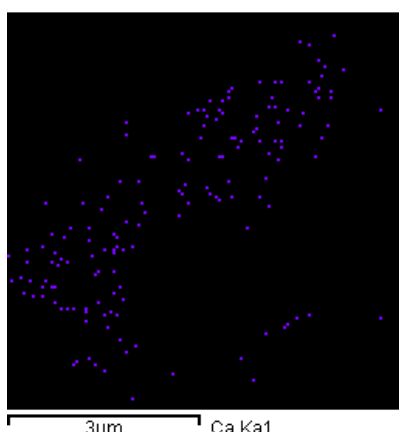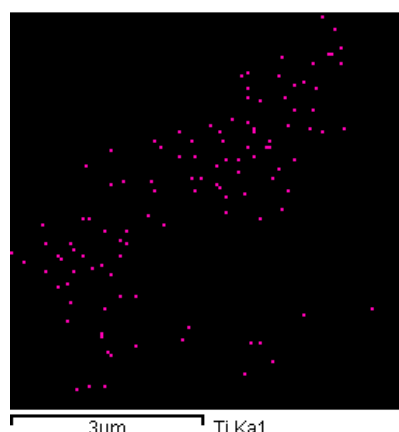

Comment:

Project: Project 1

Owner: INCA

Sample: L4E-MW-No

Type: Default

Label : Sum Spectrum

Collected : 13-May-2014 01:18 PM

Livetime (s) : 281.80

Real time (s) : 0.00

Detector : X-Max

Window : SATW

Tilt (deg) : 0.0

Elevation (deg) : 17.7

Azimuth (deg) : 0.0

Sample thickness: 0.0 nm

Sample density: 0.00 g/cm3

Spectrum processing :

Peak possibly omitted : 8.034 keV

Quantitation method : Cliff Lorimer thin ratio section.

Processing option : All elements analyzed (Normalised)

Number of iterations = 1

Standardless

| Element | Peak | Area  | k      | Abs    | Weight% | Weight% | Atomic% |
|---------|------|-------|--------|--------|---------|---------|---------|
|         | Area | Sigma | factor | Corrn. |         | Sigma   |         |
| O K     | 3903 | 115   | 1.065  | 1.000  | 44.68   | 0.88    | 59.85   |

|        |      |     |       |       |        |      |       |
|--------|------|-----|-------|-------|--------|------|-------|
| Mg K   | 2241 | 84  | 0.606 | 1.000 | 14.59  | 0.52 | 12.86 |
| Al K   | 1211 | 68  | 0.589 | 1.000 | 7.68   | 0.42 | 6.10  |
| Si K   | 3221 | 102 | 0.569 | 1.000 | 19.71  | 0.59 | 15.04 |
| K K    | 860  | 53  | 0.552 | 1.000 | 5.10   | 0.31 | 2.80  |
| Ca K   | 161  | 30  | 0.542 | 1.000 | 0.94   | 0.18 | 0.50  |
| Ti K   | 131  | 25  | 0.608 | 1.000 | 0.85   | 0.16 | 0.38  |
| Fe K   | 884  | 52  | 0.678 | 1.000 | 6.44   | 0.37 | 2.47  |
| Totals |      |     |       |       | 100.00 |      |       |

Project: Project 1

Owner: INCA

Sample: L4E-MW-No

Type: Default

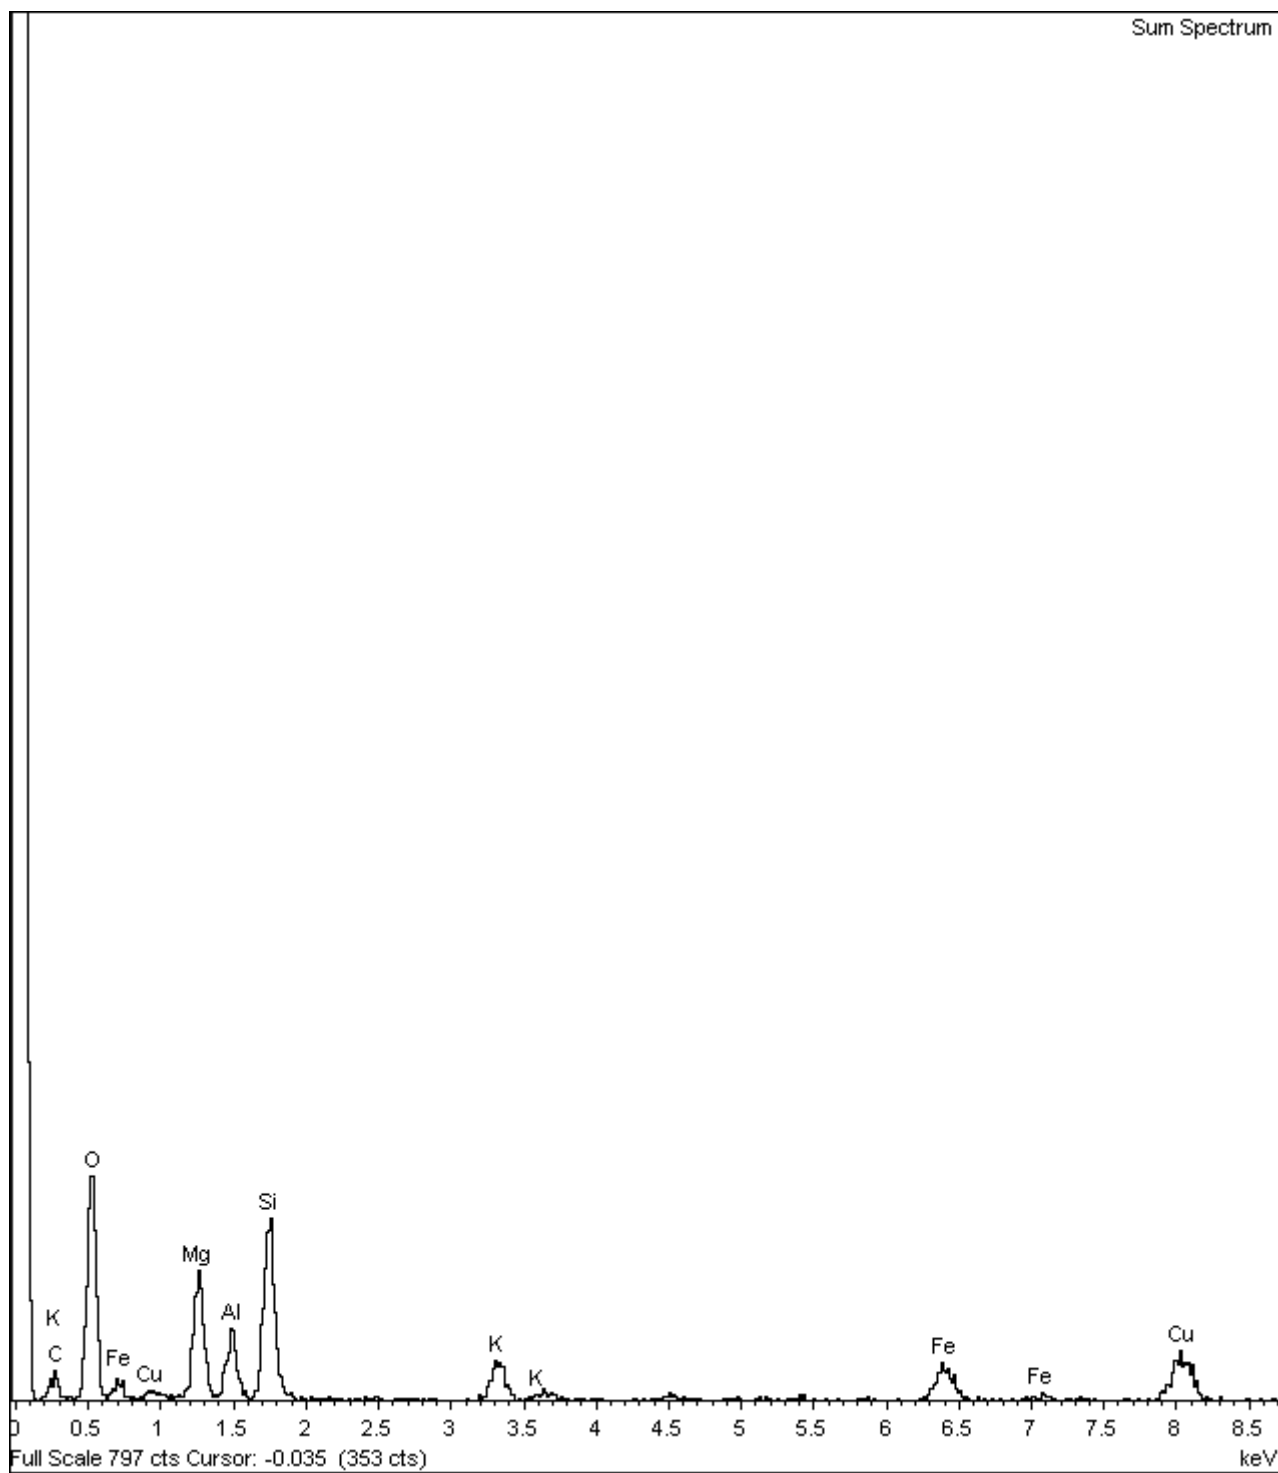

Comment:

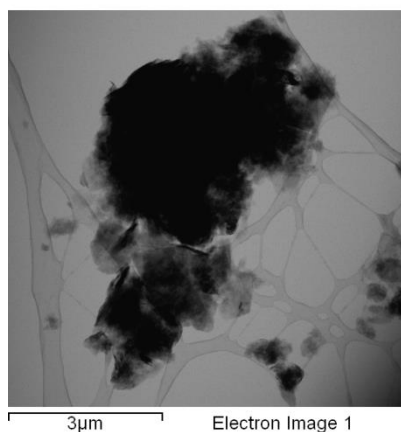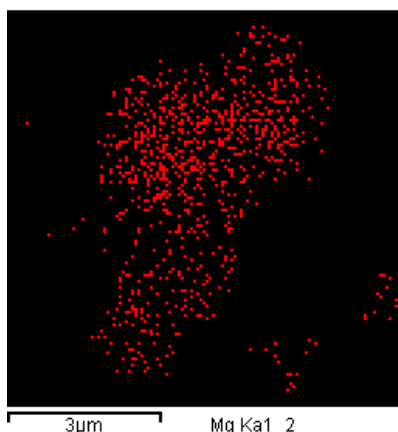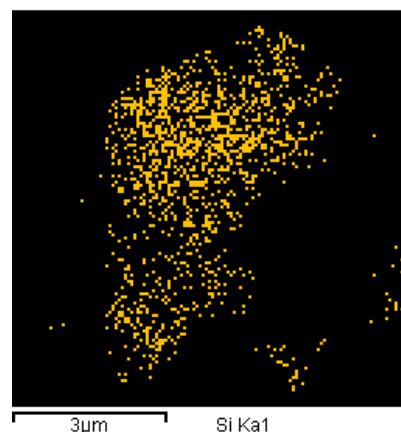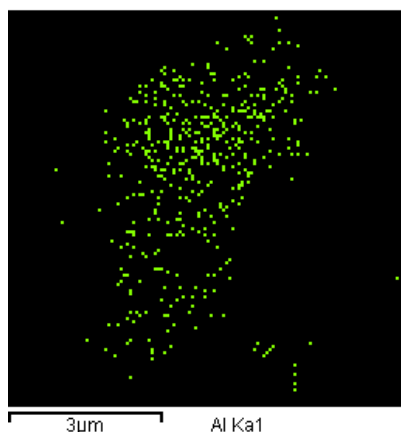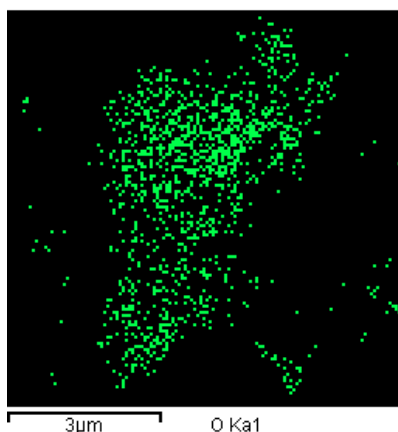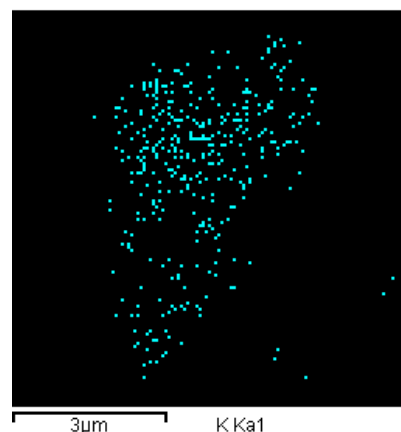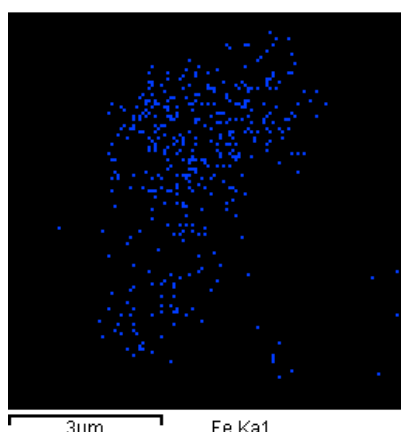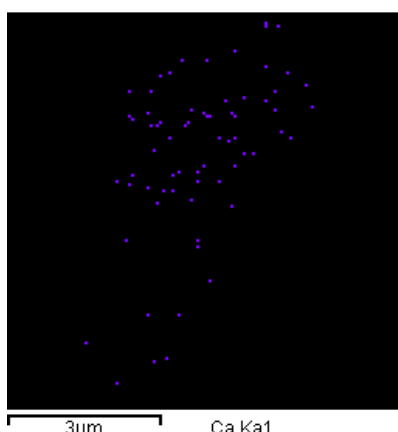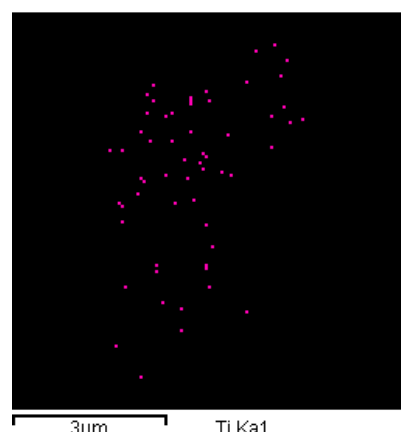

Comment:

Project: Project 1

Owner: INCA

Sample: L4E-MW-No

Type: Default

Label : Sum Spectrum

Collected : 13-May-2014 01:26 PM

Livetime (s) : 163.84

Real time (s) : 0.00

Detector : X-Max

Window : SATW

Tilt (deg) : 0.0

Elevation (deg) : 17.7

Azimuth (deg) : 0.0

Sample thickness: 0.0 nm

Sample density: 0.00 g/cm3

Spectrum processing :

Peak possibly omitted : 8.036 keV

Quantitation method : Cliff Lorimer thin ratio section.

Processing option : All elements analyzed (Normalised)

Number of iterations = 1

Standardless

| Element | Peak | Area  | k      | Abs    | Weight% | Weight% | Atomic% |
|---------|------|-------|--------|--------|---------|---------|---------|
|         | Area | Sigma | factor | Corrn. |         | Sigma   |         |
| O K     | 1923 | 84    | 1.065  | 1.000  | 42.27   | 1.25    | 57.74   |



|        |      |    |       |       |        |      |       |
|--------|------|----|-------|-------|--------|------|-------|
| Mg K   | 1150 | 61 | 0.606 | 1.000 | 14.37  | 0.73 | 12.92 |
| Al K   | 580  | 48 | 0.589 | 1.000 | 7.06   | 0.57 | 5.72  |
| Si K   | 1818 | 75 | 0.569 | 1.000 | 21.36  | 0.84 | 16.62 |
| K K    | 531  | 41 | 0.552 | 1.000 | 6.05   | 0.47 | 3.38  |
| Ca K   | 52   | 21 | 0.542 | 1.000 | 0.59   | 0.24 | 0.32  |
| Ti K   | 57   | 19 | 0.608 | 1.000 | 0.72   | 0.23 | 0.33  |
| Fe K   | 543  | 42 | 0.678 | 1.000 | 7.60   | 0.57 | 2.97  |
| Totals |      |    |       |       | 100.00 |      |       |

Project: Project 1

Owner: INCA

Sample: L4E-MW-No

Type: Default

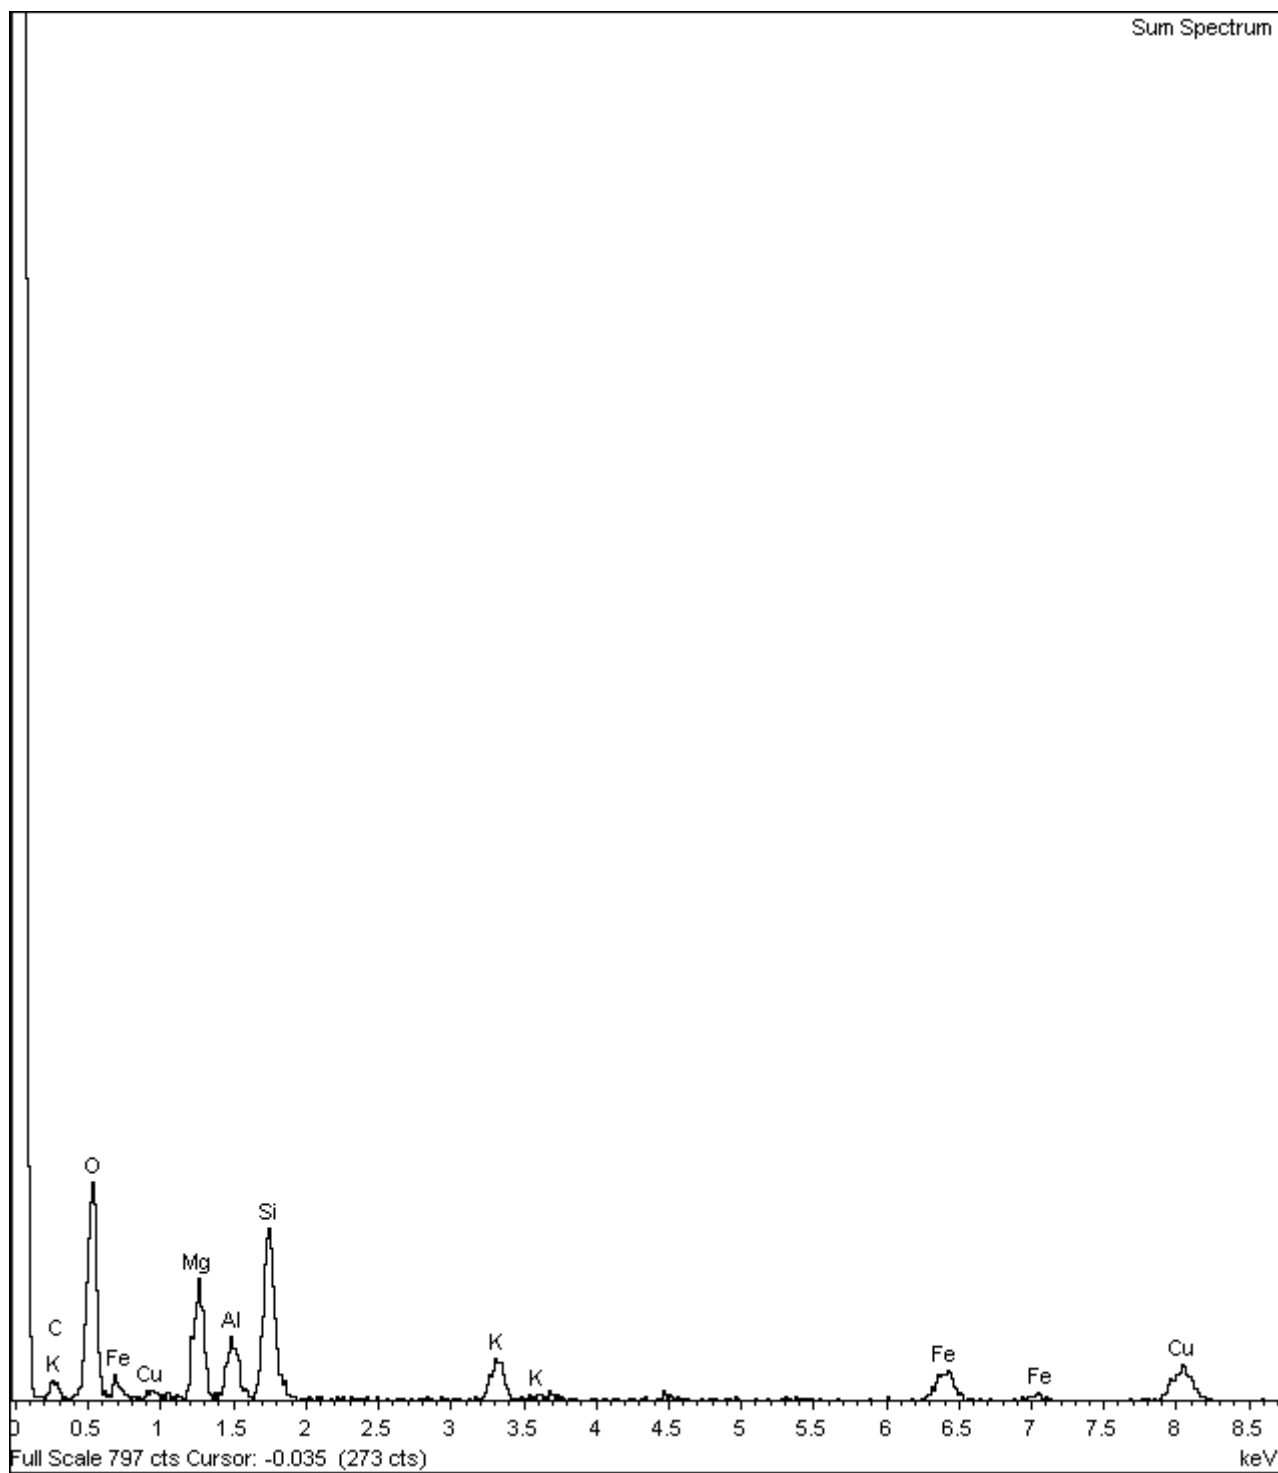

Comment:

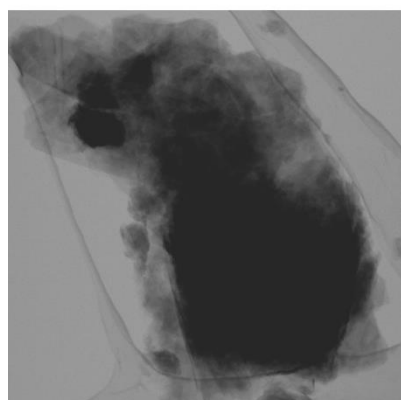

1µm

Electron Image 1

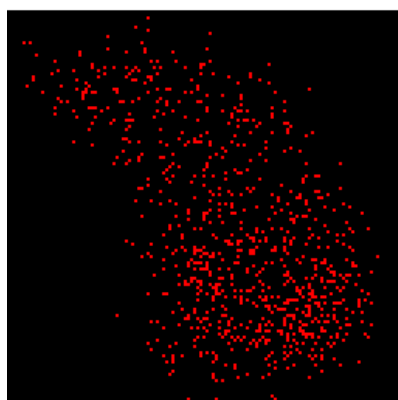

1µm

Mg Ka1\_2

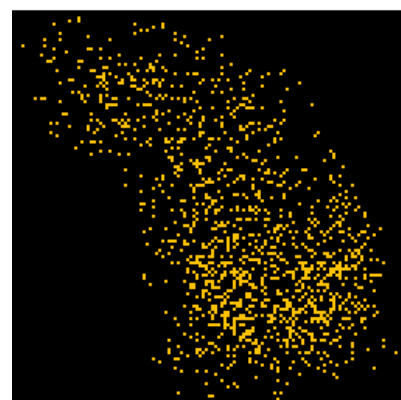

1µm

Si Ka1

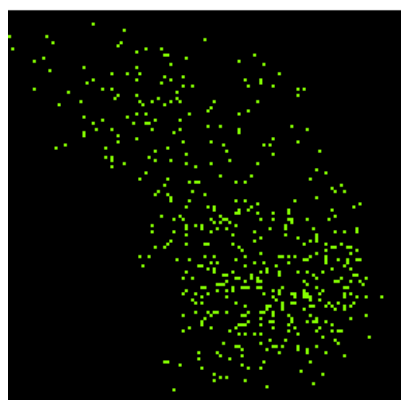

1µm

Al Ka1

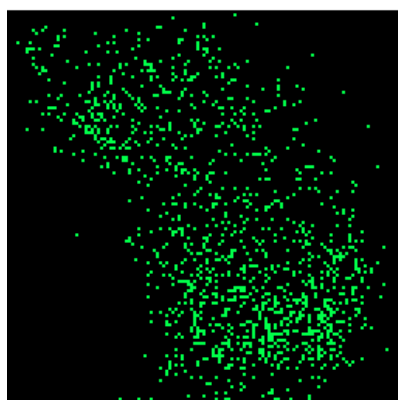

1µm

O Ka1

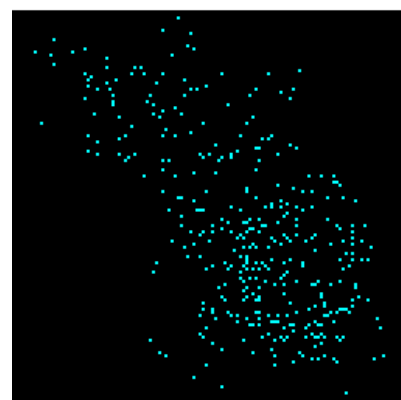

1µm

K Ka1

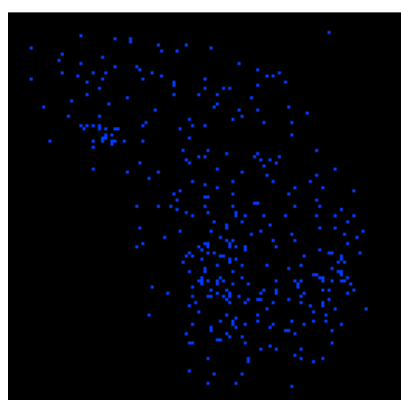

1µm

Fe Ka1

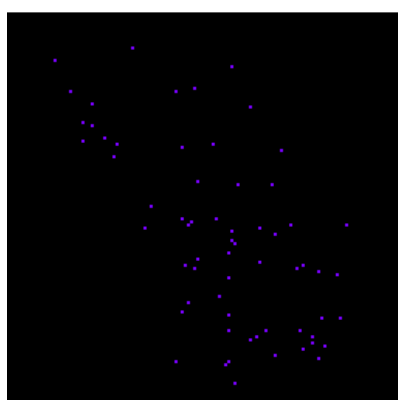

1µm

Ca Ka1

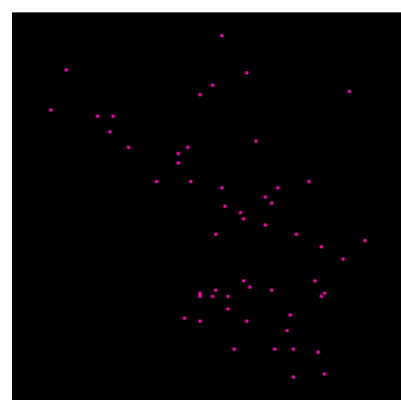

1µm

Ti Ka1

Comment:

Project: Project 1

Owner: INCA

Sample: L4E-MW-No

Type: Default

Label : Sum Spectrum

Collected : 13-May-2014 01:32 PM

Livetime (s) : 117.96

Real time (s) : 0.00

Detector : X-Max

Window : SATW

Tilt (deg) : 0.0

Elevation (deg) : 17.7

Azimuth (deg) : 0.0

Sample thickness: 0.0 nm

Sample density: 0.00 g/cm3

Spectrum processing :

Peak possibly omitted : 8.035 keV

Quantitation method : Cliff Lorimer thin ratio section.

Processing option : All elements analyzed (Normalised)

Number of iterations = 1

Standardless

| Element | Peak | Area  | k      | Abs   | Weight% | Weight% | Atomic% |
|---------|------|-------|--------|-------|---------|---------|---------|
|         | Area | Sigma | factor | Corn. |         | Sigma   |         |
| O K     | 1819 | 84    | 1.065  | 1.000 | 42.29   | 1.31    | 57.69   |

|        |      |    |       |       |        |      |       |
|--------|------|----|-------|-------|--------|------|-------|
| Mg K   | 1064 | 58 | 0.606 | 1.000 | 14.07  | 0.74 | 12.63 |
| Al K   | 544  | 48 | 0.589 | 1.000 | 7.00   | 0.60 | 5.66  |
| Si K   | 1758 | 74 | 0.569 | 1.000 | 21.85  | 0.89 | 16.98 |
| K K    | 531  | 41 | 0.552 | 1.000 | 6.40   | 0.49 | 3.57  |
| Ca K   | 81   | 21 | 0.542 | 1.000 | 0.96   | 0.25 | 0.52  |
| Ti K   | 53   | 18 | 0.608 | 1.000 | 0.70   | 0.24 | 0.32  |
| Fe K   | 456  | 39 | 0.678 | 1.000 | 6.74   | 0.56 | 2.64  |
| Totals |      |    |       |       | 100.00 |      |       |
