# Supplementary material for: Heterogeneous Distribution of Interlayer Cations and Iron as a Plausible Explanation of the Non-Exfoliation of Commercial Vermiculites Post Alcohol Treatment and Microwave Irradiation
Source: MDPI journal article supplement (doi:10.3390/min11080835), 2021-08-01
Supplement: s1 [file s1]

Project: Project 1

Owner: INCA

Sample: L4E-MW-Ex

Type: Default

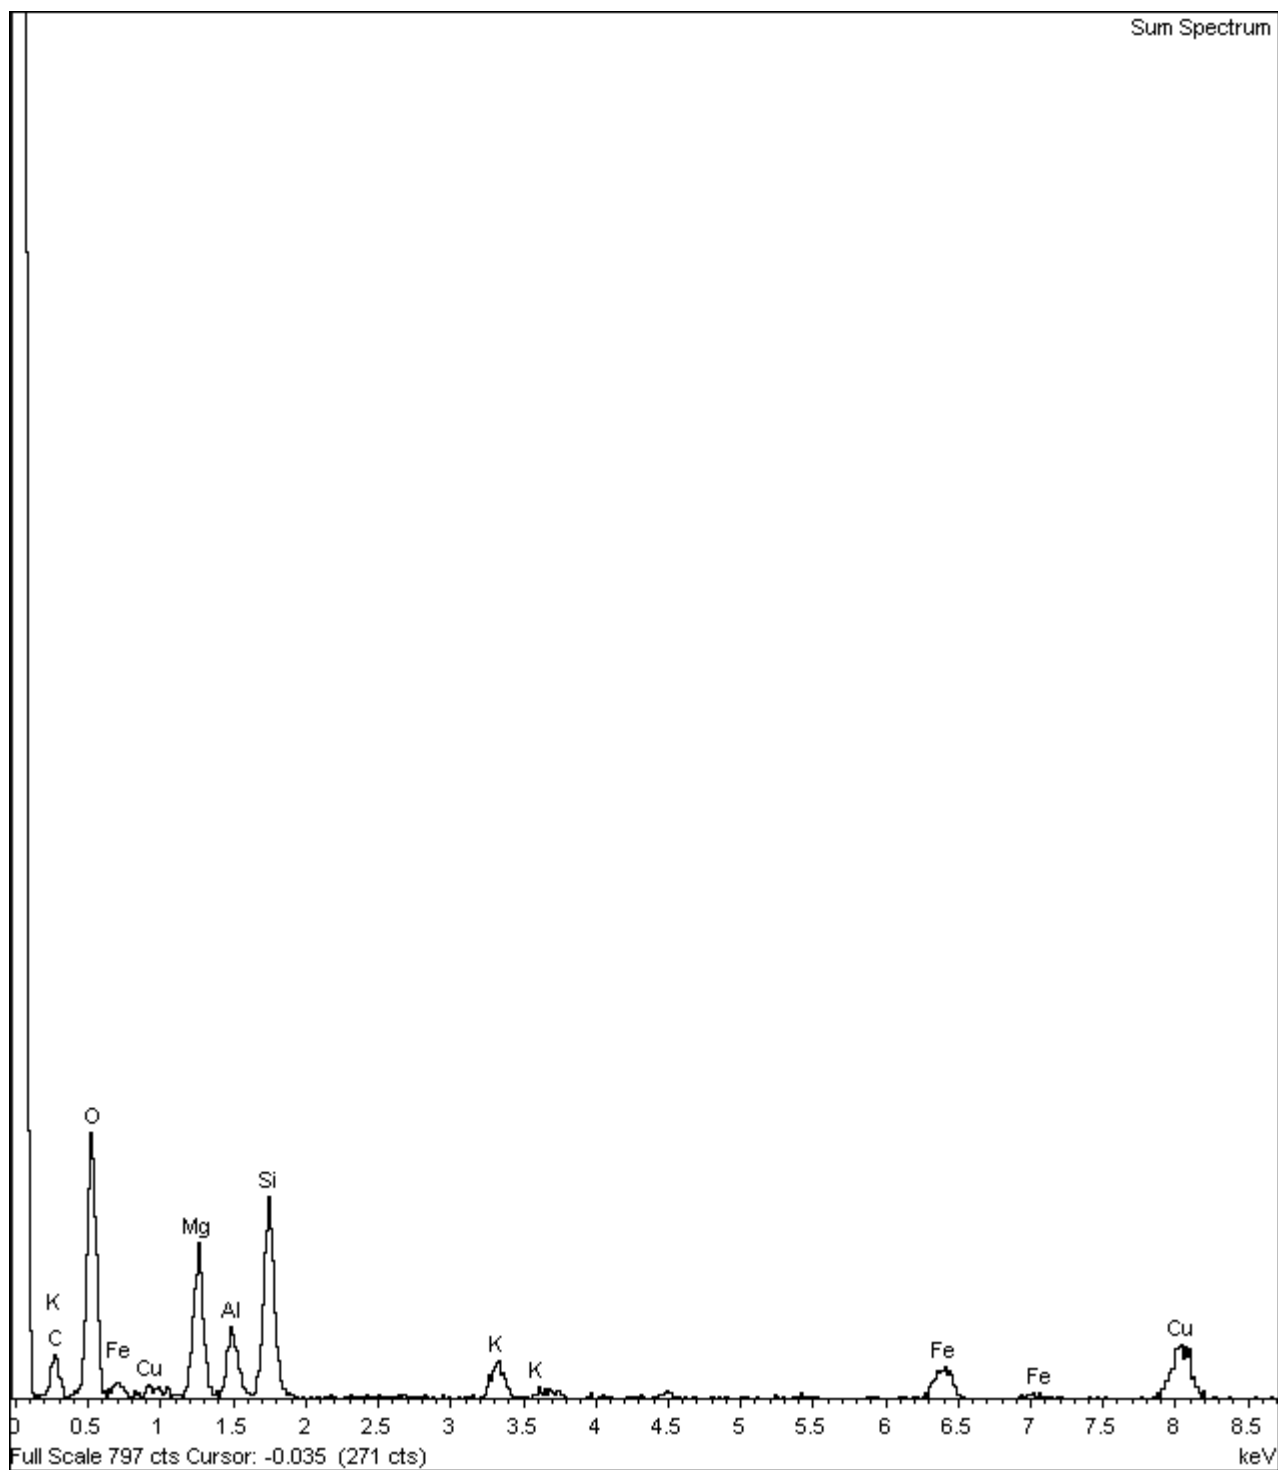

Comment:

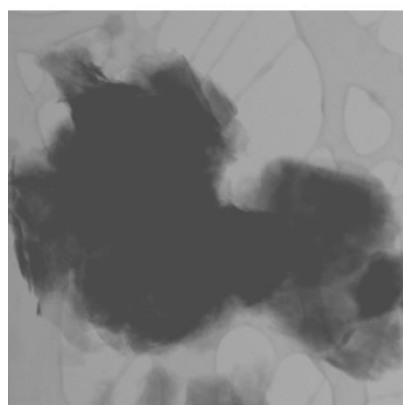

Electron Image 1

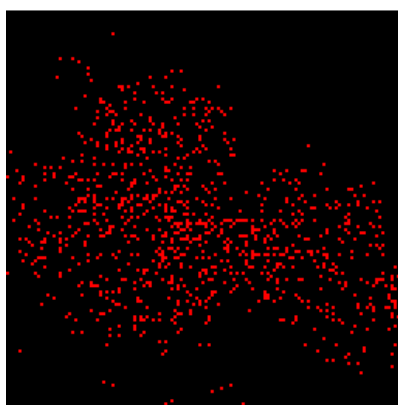

Mg Ka1\_2

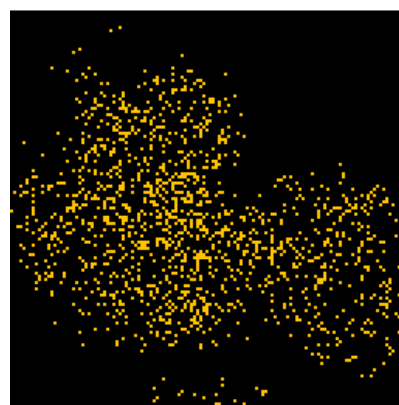

Si Ka1

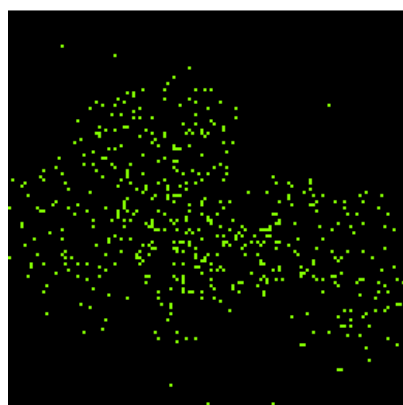

Al Ka1

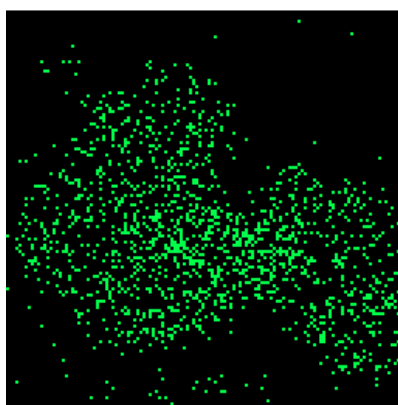

O Ka1

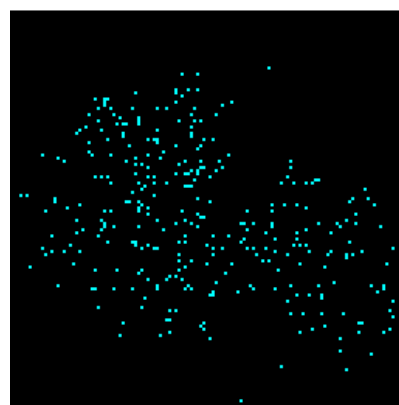

K Ka1

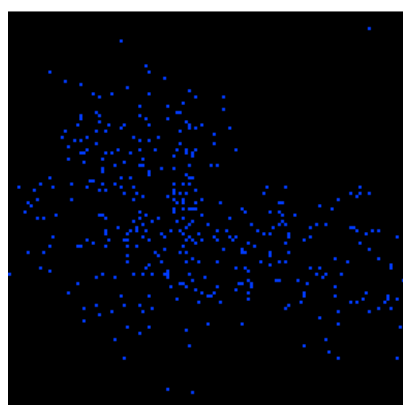

Fe Ka1

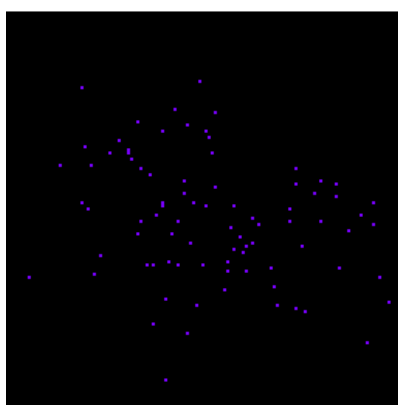

Ca Ka1

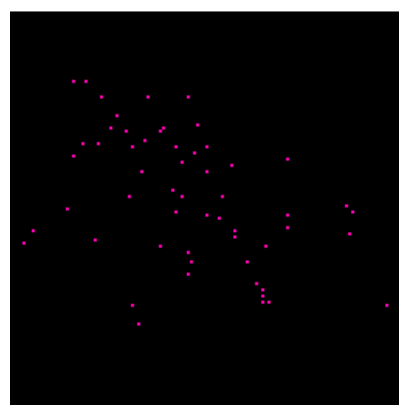

Ti Ka1

Comment:

Project: Project 1

Owner: INCA

Sample: L4E-MW-Ex

Type: Default

Label : Sum Spectrum

Collected : 13-May-2014 01:47 PM

Livetime (s) : 124.52

Real time (s) : 0.00

Detector : X-Max

Window : SATW

Tilt (deg) : 0.0

Elevation (deg) : 17.7

Azimuth (deg) : 0.0

Sample thickness: 0.0 nm

Sample density: 0.00 g/cm3

Spectrum processing :

Peak possibly omitted : 8.035 keV

Quantitation method : Cliff Lorimer thin ratio section.

Processing option : All elements analyzed (Normalised)

Number of iterations = 1

Standardless

| Element | Peak | Area  | k      | Abs    | Weight% | Weight% | Atomic% |
|---------|------|-------|--------|--------|---------|---------|---------|
|         | Area | Sigma | factor | Corrn. |         | Sigma   |         |
| O K     | 2210 | 91    | 1.065  | 1.000  | 44.31   | 1.20    | 59.59   |

|        |      |    |       |       |        |      |       |
|--------|------|----|-------|-------|--------|------|-------|
| Mg K   | 1249 | 63 | 0.606 | 1.000 | 14.23  | 0.69 | 12.60 |
| Al K   | 590  | 49 | 0.589 | 1.000 | 6.55   | 0.53 | 5.22  |
| Si K   | 2001 | 77 | 0.569 | 1.000 | 21.43  | 0.80 | 16.42 |
| K K    | 451  | 39 | 0.552 | 1.000 | 4.68   | 0.40 | 2.58  |
| Ca K   | 95   | 23 | 0.542 | 1.000 | 0.97   | 0.24 | 0.52  |
| Ti K   | 68   | 19 | 0.608 | 1.000 | 0.77   | 0.21 | 0.35  |
| Fe K   | 552  | 40 | 0.678 | 1.000 | 7.04   | 0.50 | 2.71  |
| Totals |      |    |       |       | 100.00 |      |       |

Project: Project 1

Owner: INCA

Sample: L4E-MW-Ex

Type: Default

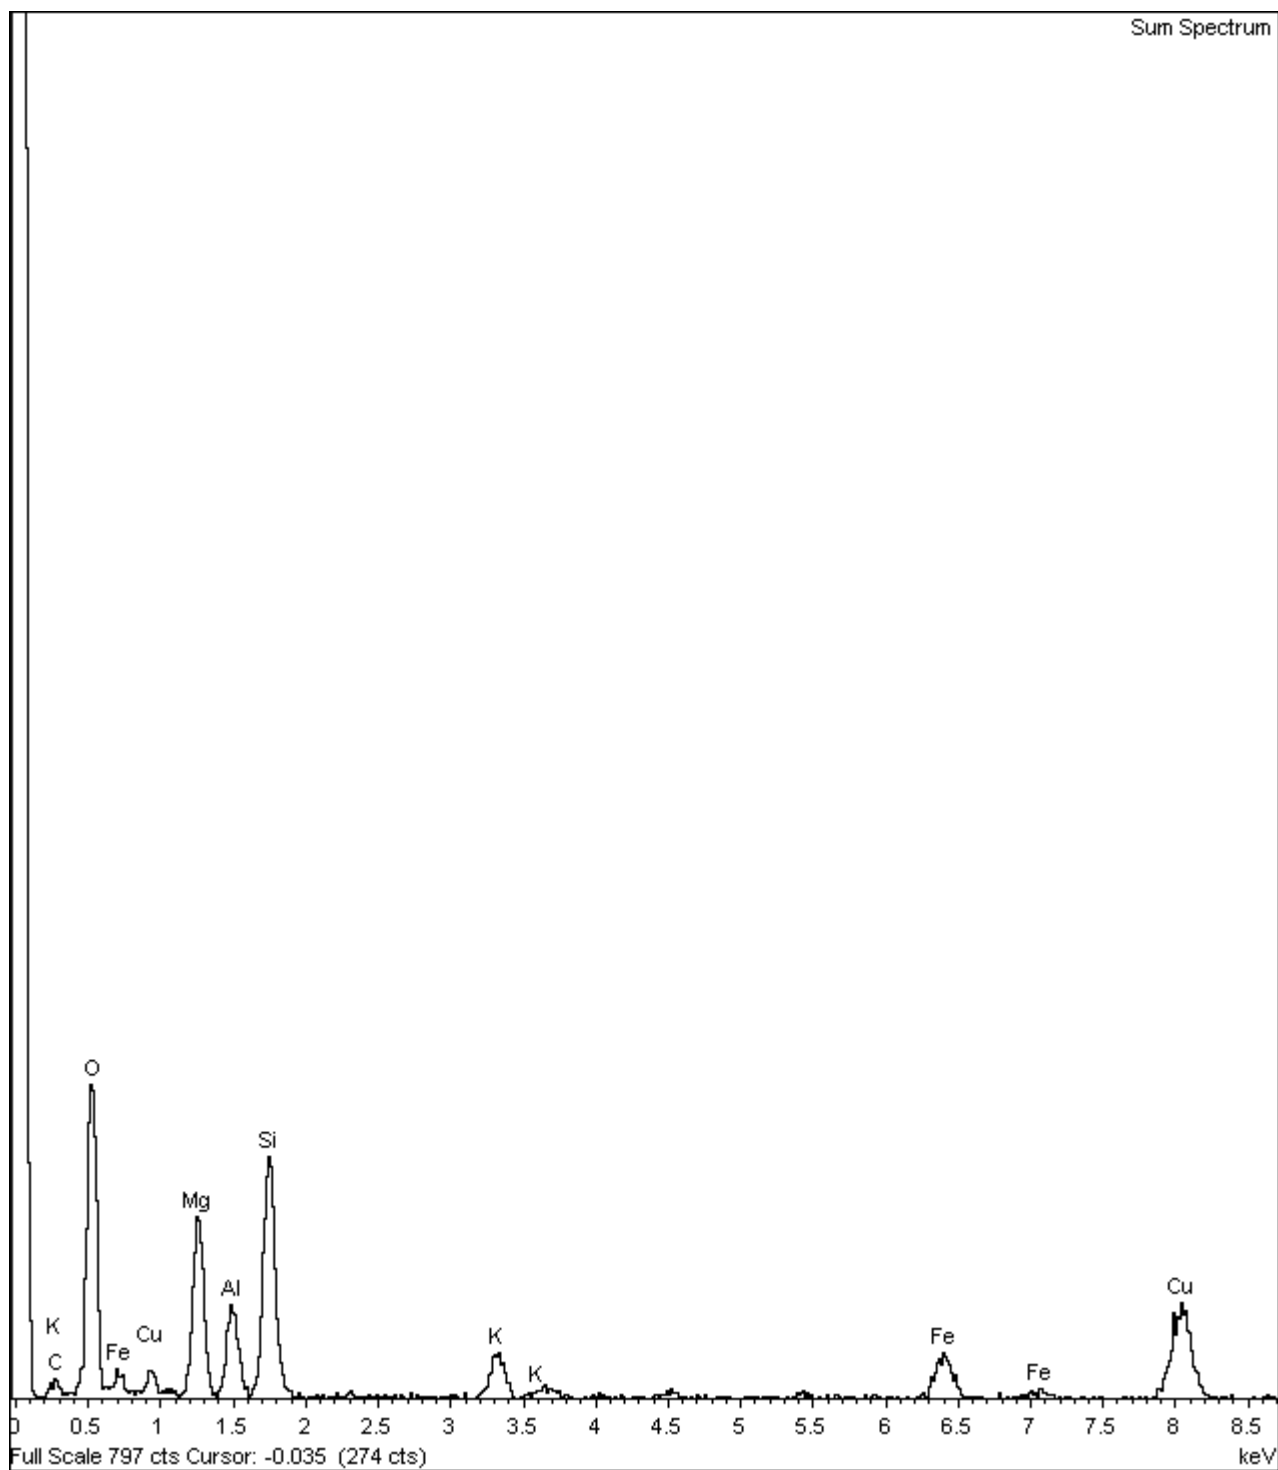

Comment:

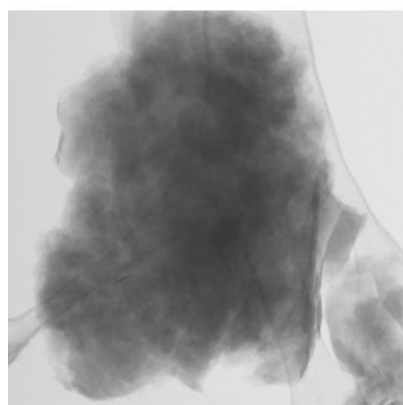

1µm

Electron Image 1

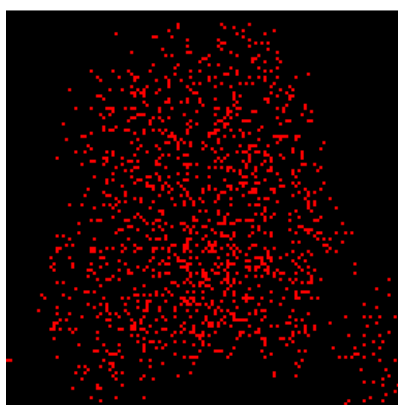

1µm

Mg Ka1\_2

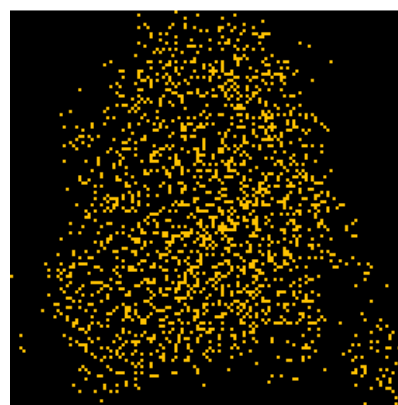

1µm

Si Ka1

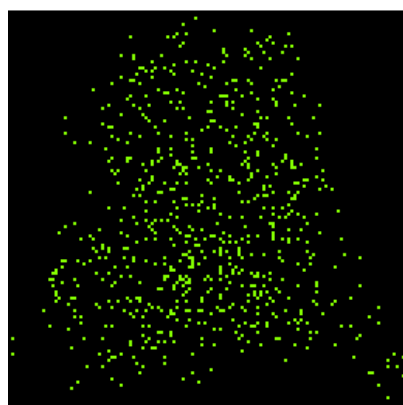

1µm

Al Ka1

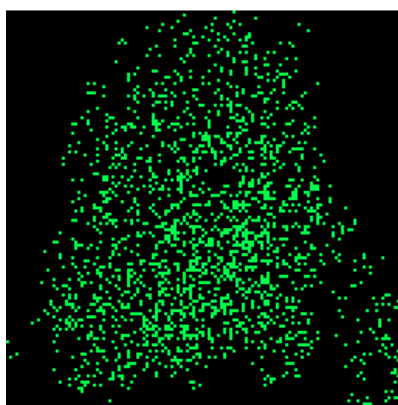

1µm

O Ka1

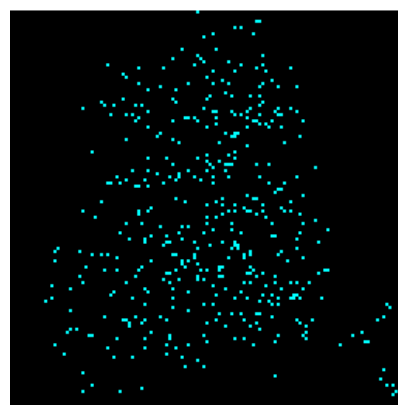

1µm

K Ka1

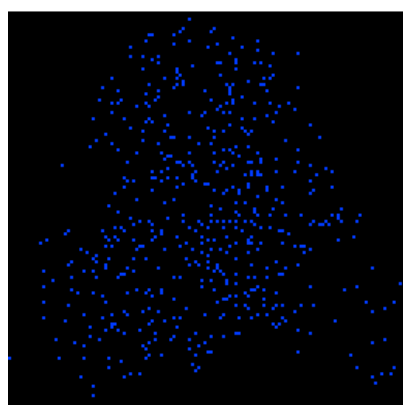

1µm

Fe Ka1

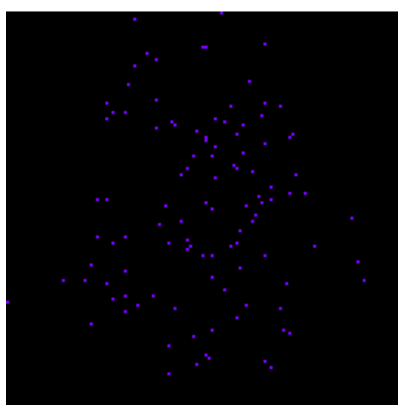

1µm

Ca Ka1

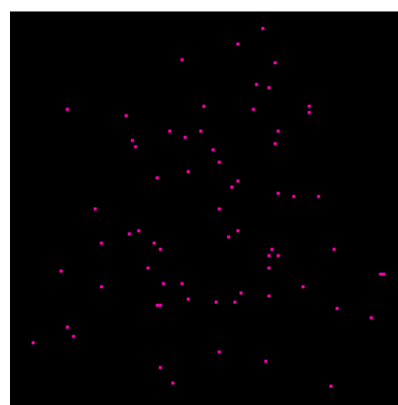

1µm

Ti Ka1

Comment:

Project: Project 1

Owner: INCA

Sample: L4E-MW-Ex

Type: Default

Label : Sum Spectrum

Collected : 13-May-2014 01:53 PM

Livetime (s) : 124.52

Real time (s) : 0.00

Detector : X-Max

Window : SATW

Tilt (deg) : 0.0

Elevation (deg) : 17.7

Azimuth (deg) : 0.0

Sample thickness: 0.0 nm

Sample density: 0.00 g/cm3

Spectrum processing :

Peaks possibly omitted : 8.038, 8.893 keV

Quantitation method : Cliff Lorimer thin ratio section.

Processing option : All elements analyzed (Normalised)

Number of iterations = 1

Standardless

| Element | Peak | Area  | k      | Abs   | Weight% | Weight% | Atomic% |
|---------|------|-------|--------|-------|---------|---------|---------|
|         | Area | Sigma | factor | Corn. |         | Sigma   |         |
| O K     | 2731 | 97    | 1.065  | 1.000 | 42.95   | 1.04    | 58.17   |

|        |      |    |       |       |        |      |       |
|--------|------|----|-------|-------|--------|------|-------|
| Mg K   | 1711 | 74 | 0.606 | 1.000 | 15.30  | 0.63 | 13.64 |
| Al K   | 824  | 59 | 0.589 | 1.000 | 7.17   | 0.50 | 5.76  |
| Si K   | 2492 | 90 | 0.569 | 1.000 | 20.95  | 0.71 | 16.16 |
| K K    | 599  | 45 | 0.552 | 1.000 | 4.88   | 0.36 | 2.71  |
| Ca K   | 98   | 26 | 0.542 | 1.000 | 0.79   | 0.21 | 0.42  |
| Ti K   | 69   | 20 | 0.608 | 1.000 | 0.62   | 0.18 | 0.28  |
| Fe K   | 733  | 47 | 0.678 | 1.000 | 7.34   | 0.46 | 2.85  |
| Totals |      |    |       |       | 100.00 |      |       |



Project: Project 1

Owner: INCA

Sample: L4E-MW-Ex

Type: Default

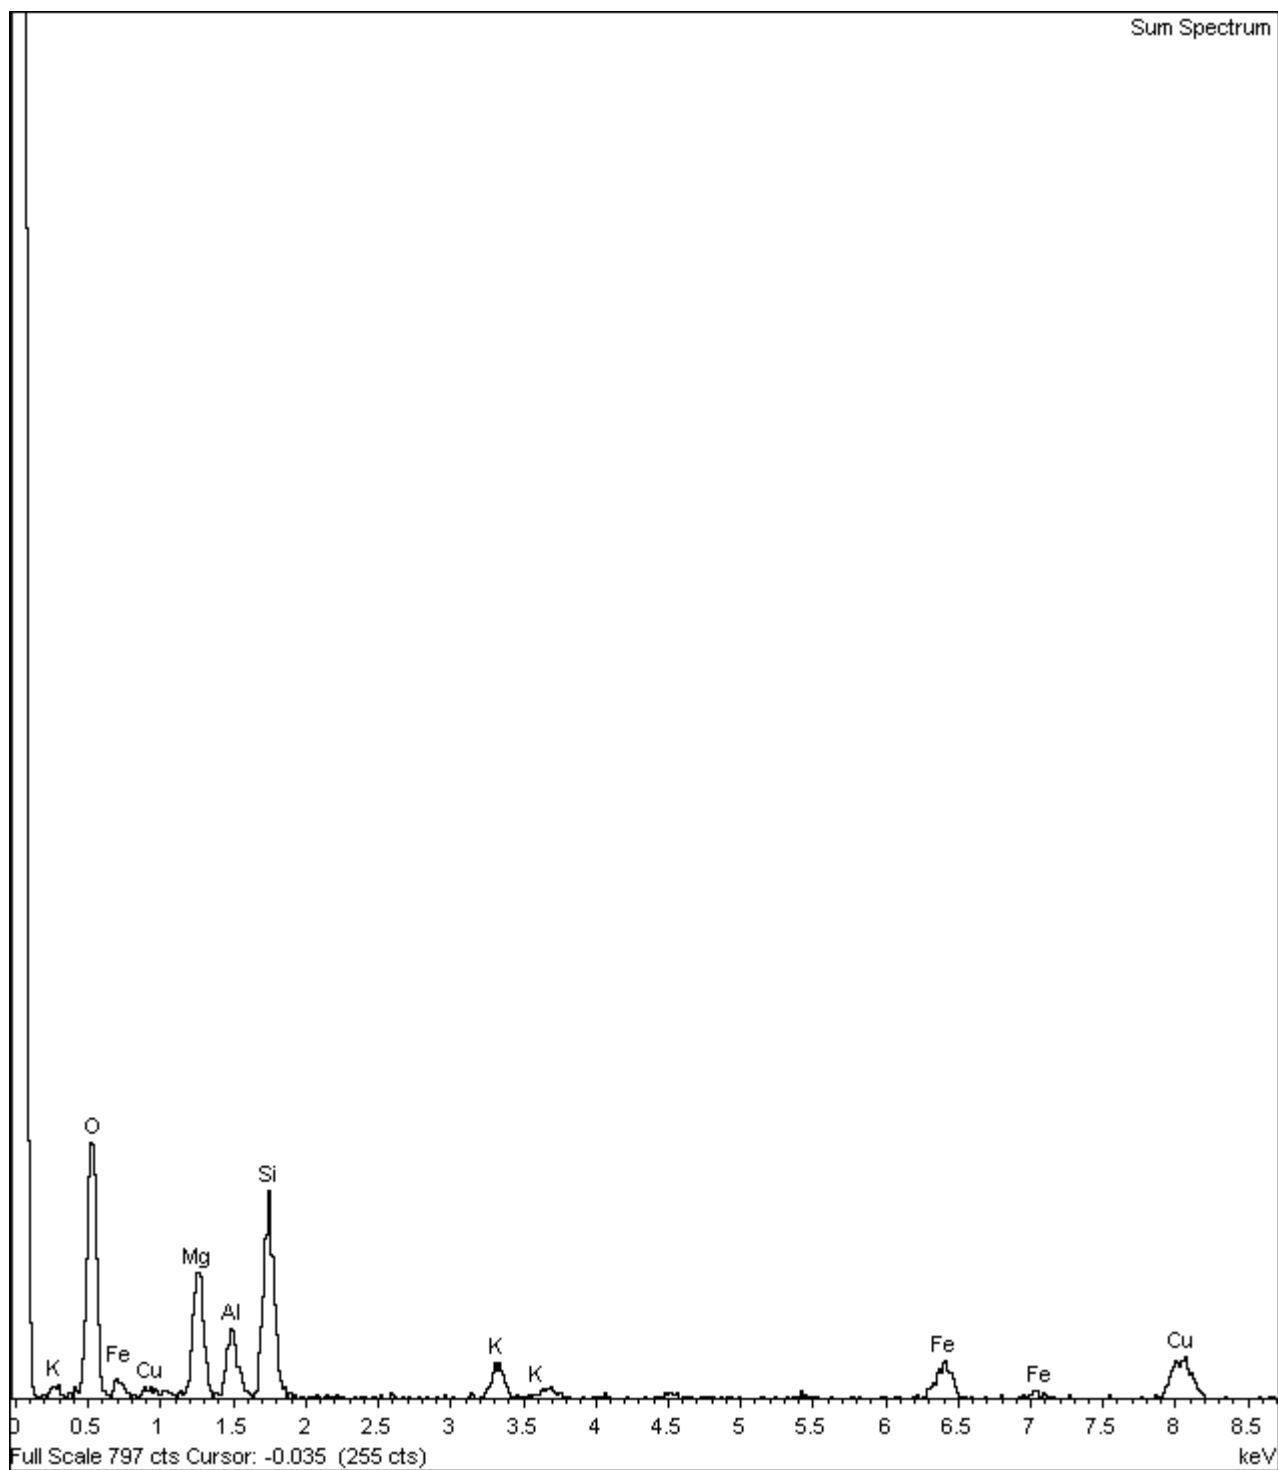

Comment:

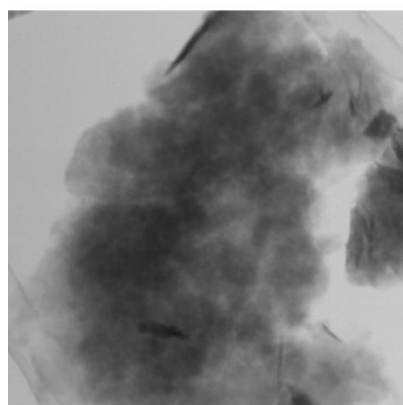

Electron Image 1

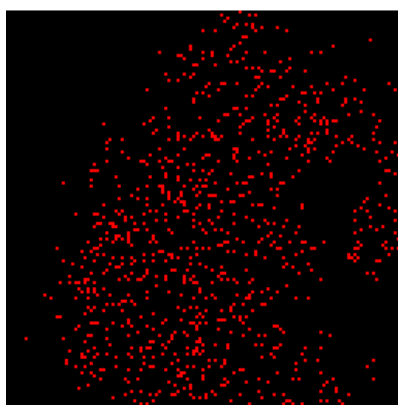

Mg Ka1\_2

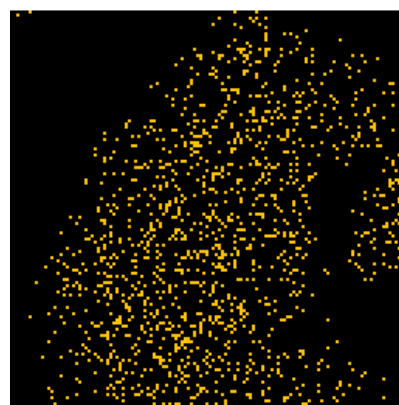

Si Ka1

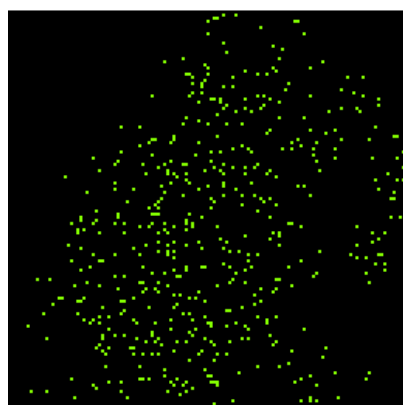

Al Ka1

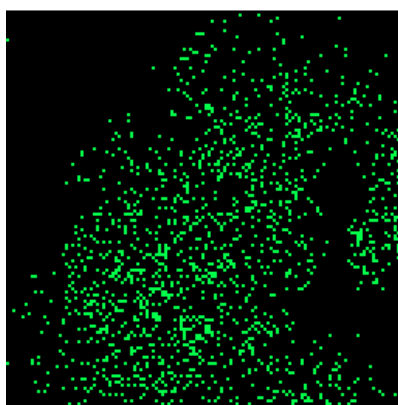

O Ka1

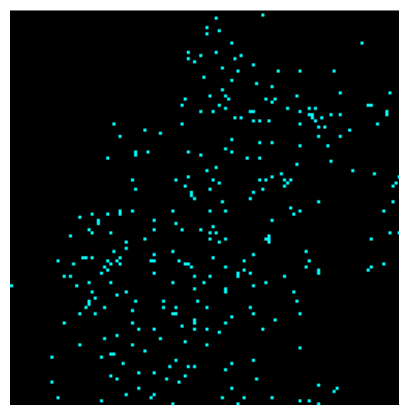

K Ka1

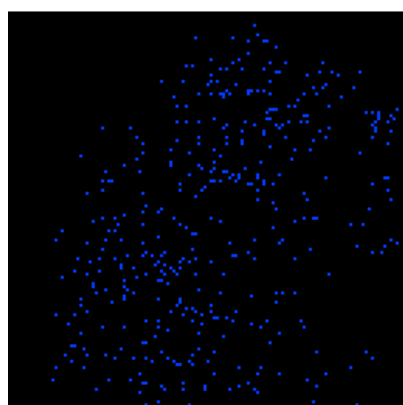

Fe Ka1

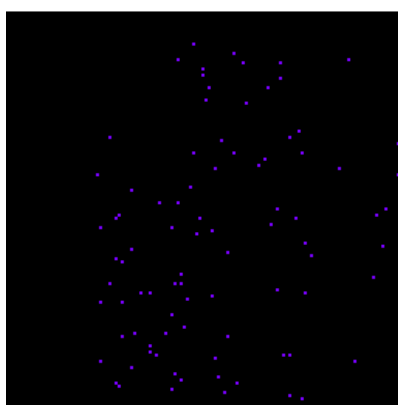

Ca Ka1

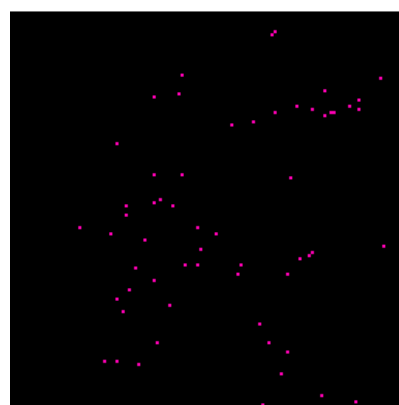

Ti Ka1

Comment:

Project: Project 1

Owner: INCA

Sample: L4E-MW-Ex

Type: Default

Label : Sum Spectrum

Collected : 13-May-2014 01:59 PM

Livetime (s) : 124.52

Real time (s) : 0.00

Detector : X-Max

Window : SATW

Tilt (deg) : 0.0

Elevation (deg) : 17.7

Azimuth (deg) : 0.0

Sample thickness: 0.0 nm

Sample density: 0.00 g/cm3

Spectrum processing :

Peak possibly omitted : 8.036 keV

Quantitation method : Cliff Lorimer thin ratio section.

Processing option : All elements analyzed (Normalised)

Number of iterations = 1

Standardless

| Element | Peak | Area  | k      | Abs   | Weight% | Weight% | Atomic% |
|---------|------|-------|--------|-------|---------|---------|---------|
|         | Area | Sigma | factor | Corn. |         | Sigma   |         |
| O K     | 2268 | 91    | 1.065  | 1.000 | 45.30   | 1.18    | 60.75   |

|        |      |    |       |       |        |      |       |
|--------|------|----|-------|-------|--------|------|-------|
| Mg K   | 1217 | 62 | 0.606 | 1.000 | 13.82  | 0.68 | 12.20 |
| Al K   | 600  | 50 | 0.589 | 1.000 | 6.63   | 0.54 | 5.27  |
| Si K   | 1879 | 76 | 0.569 | 1.000 | 20.05  | 0.78 | 15.32 |
| K K    | 469  | 39 | 0.552 | 1.000 | 4.86   | 0.40 | 2.67  |
| Ca K   | 102  | 23 | 0.542 | 1.000 | 1.04   | 0.24 | 0.56  |
| Ti K   | 66   | 19 | 0.608 | 1.000 | 0.76   | 0.22 | 0.34  |
| Fe K   | 593  | 40 | 0.678 | 1.000 | 7.54   | 0.50 | 2.90  |
| Totals |      |    |       |       | 100.00 |      |       |

Project: Project 1

Owner: INCA

Sample: L4E-MW-Ex

Type: Default

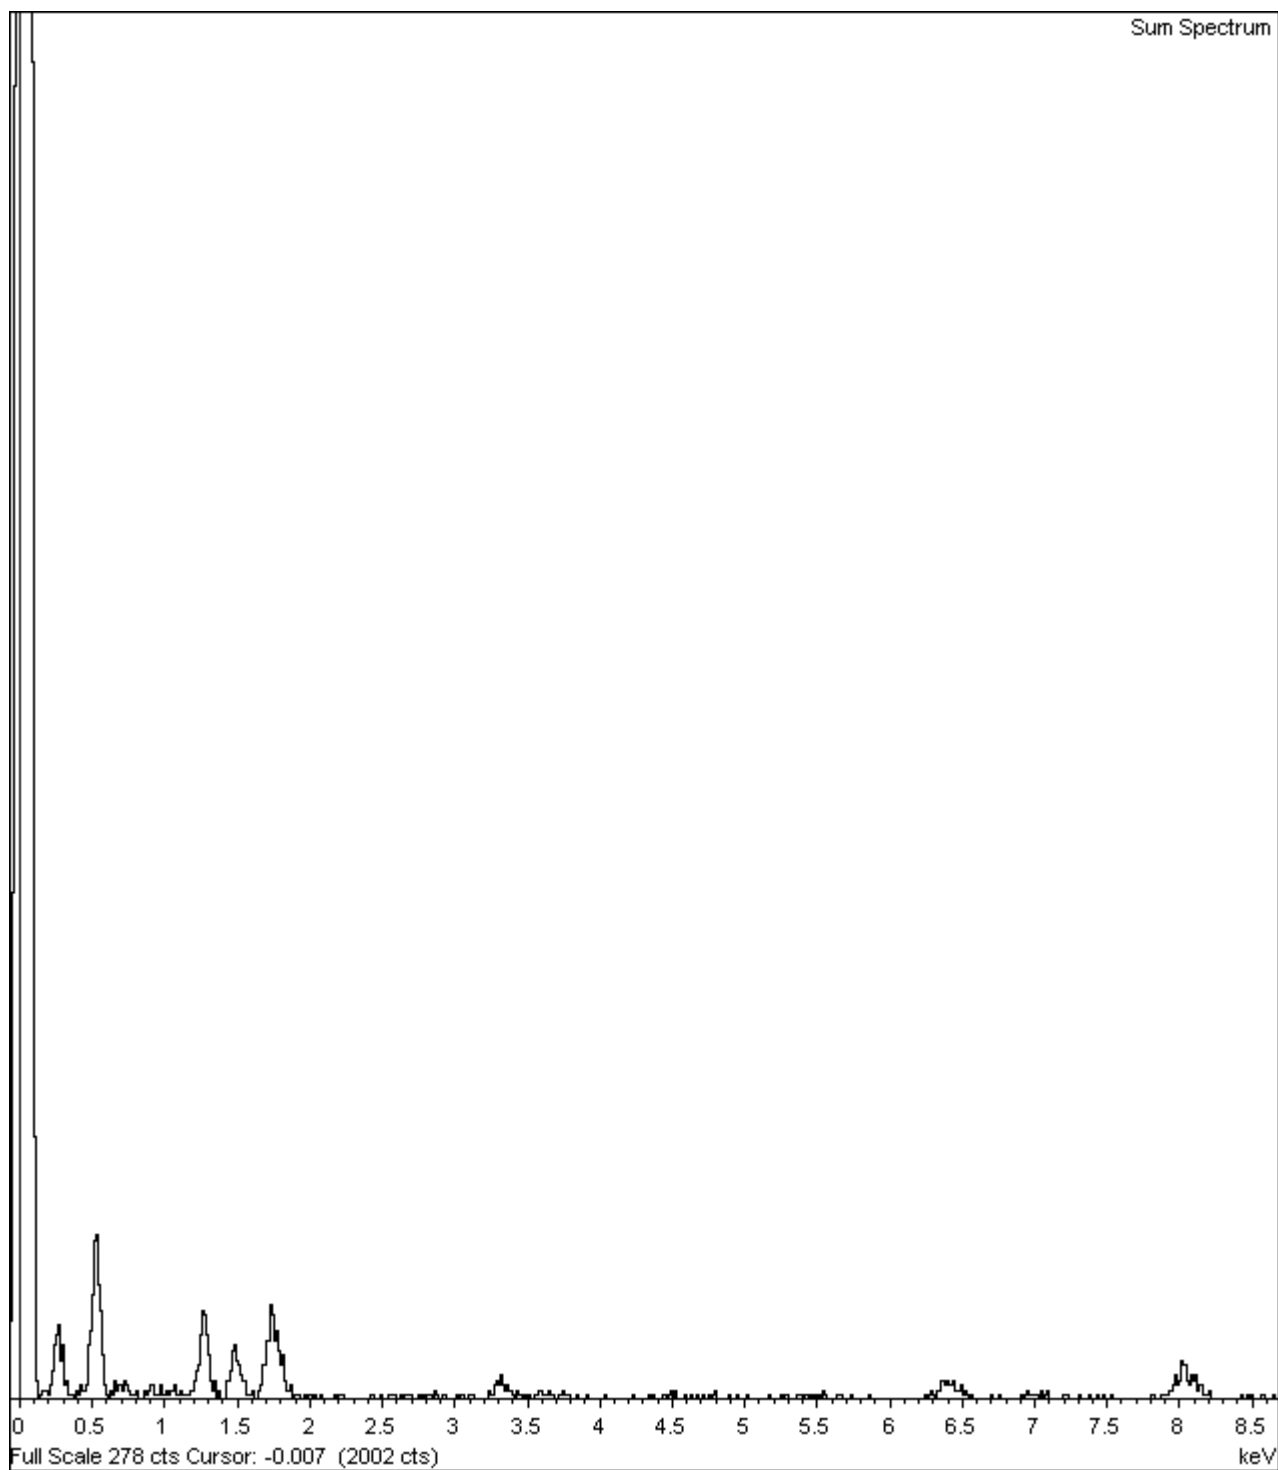

Comment:

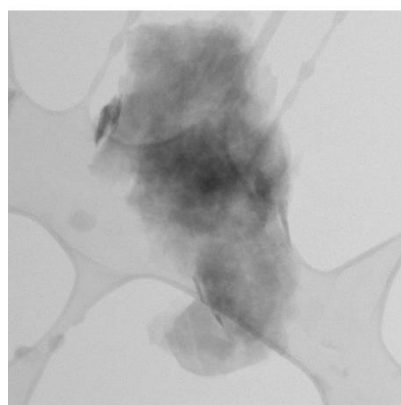

700nm Electron Image 1

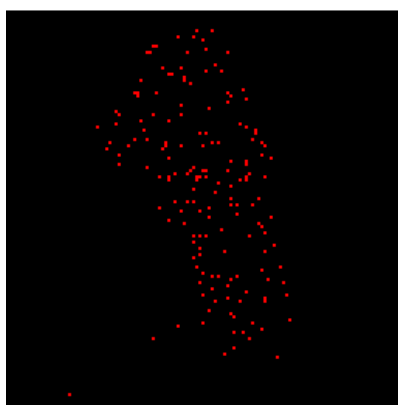

700nm Mg Ka1\_2

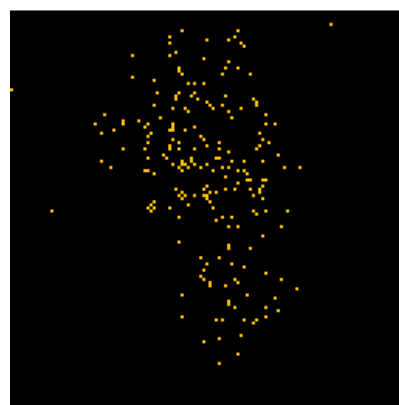

700nm Si Ka1

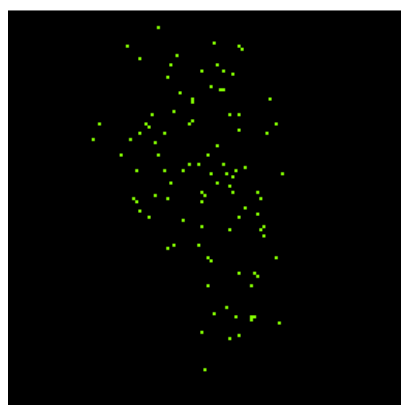

700nm Al Ka1

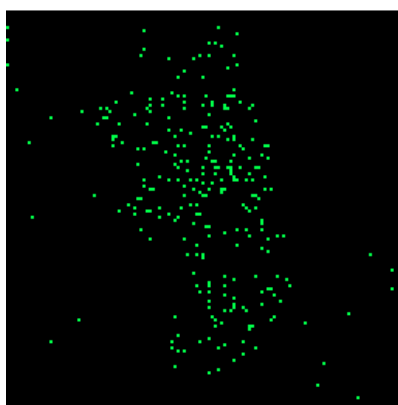

700nm O Ka1

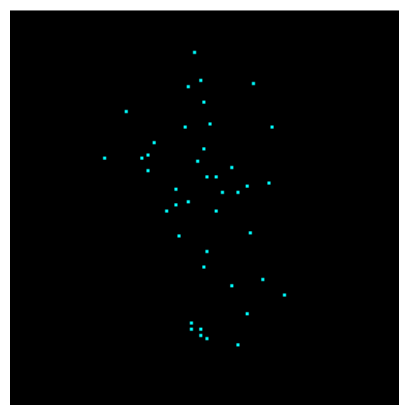

700nm K Ka1

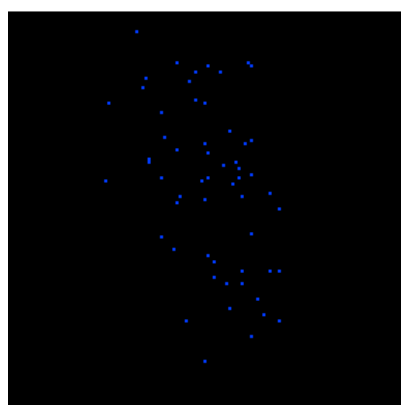

700nm Fe Ka1

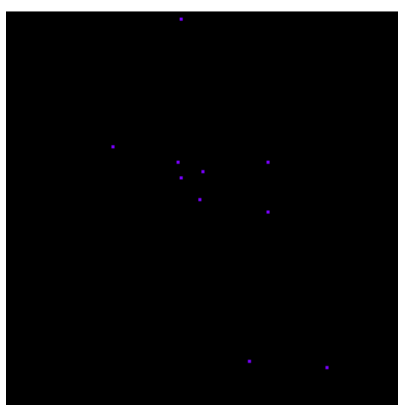

700nm Ca Ka1

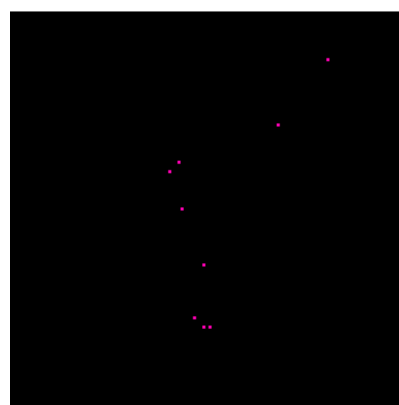

700nm Ti Ka1

Comment:

Project: Project 1

Owner: INCA

Sample: L4E-MW-Ex

Type: Default

Label : Sum Spectrum

Collected : 13-May-2014 02:05 PM

Livetime (s) : 131.07

Real time (s) : 0.00

Detector : X-Max

Window : SATW

Tilt (deg) : 0.0

Elevation (deg) : 17.7

Azimuth (deg) : 0.0

Sample thickness: 0.0 nm

Sample density: 0.00 g/cm3

Spectrum processing :

No peaks omitted

Quantitation method : Cliff Lorimer thin ratio section.

Processing option : All elements analyzed (Normalised)

Number of iterations = 1

Standardless

| Element | Peak | Area  | k      | Abs   | Weight% | Weight% | Atomic% |
|---------|------|-------|--------|-------|---------|---------|---------|
|         | Area | Sigma | factor | Corn. |         | Sigma   |         |
| O K     | 462  | 41    | 1.065  | 1.000 | 50.51   | 2.81    | 64.97   |

|        |     |    |       |       |        |      |       |
|--------|-----|----|-------|-------|--------|------|-------|
| Mg K   | 229 | 27 | 0.606 | 1.000 | 14.25  | 1.64 | 12.06 |
| Al K   | 152 | 23 | 0.589 | 1.000 | 9.20   | 1.37 | 7.01  |
| Si K   | 267 | 33 | 0.569 | 1.000 | 15.60  | 1.83 | 11.43 |
| K K    | 68  | 16 | 0.552 | 1.000 | 3.86   | 0.92 | 2.03  |
| Ca K   | 3   | 12 | 0.542 | 1.000 | 0.15   | 0.67 | 0.08  |
| Ti K   | 12  | 13 | 0.608 | 1.000 | 0.76   | 0.80 | 0.33  |
| Fe K   | 81  | 18 | 0.678 | 1.000 | 5.67   | 1.23 | 2.09  |
| Totals |     |    |       |       | 100.00 |      |       |



Project: Project 1

Owner: INCA

Sample: L4E-MW-Ex

Type: Default

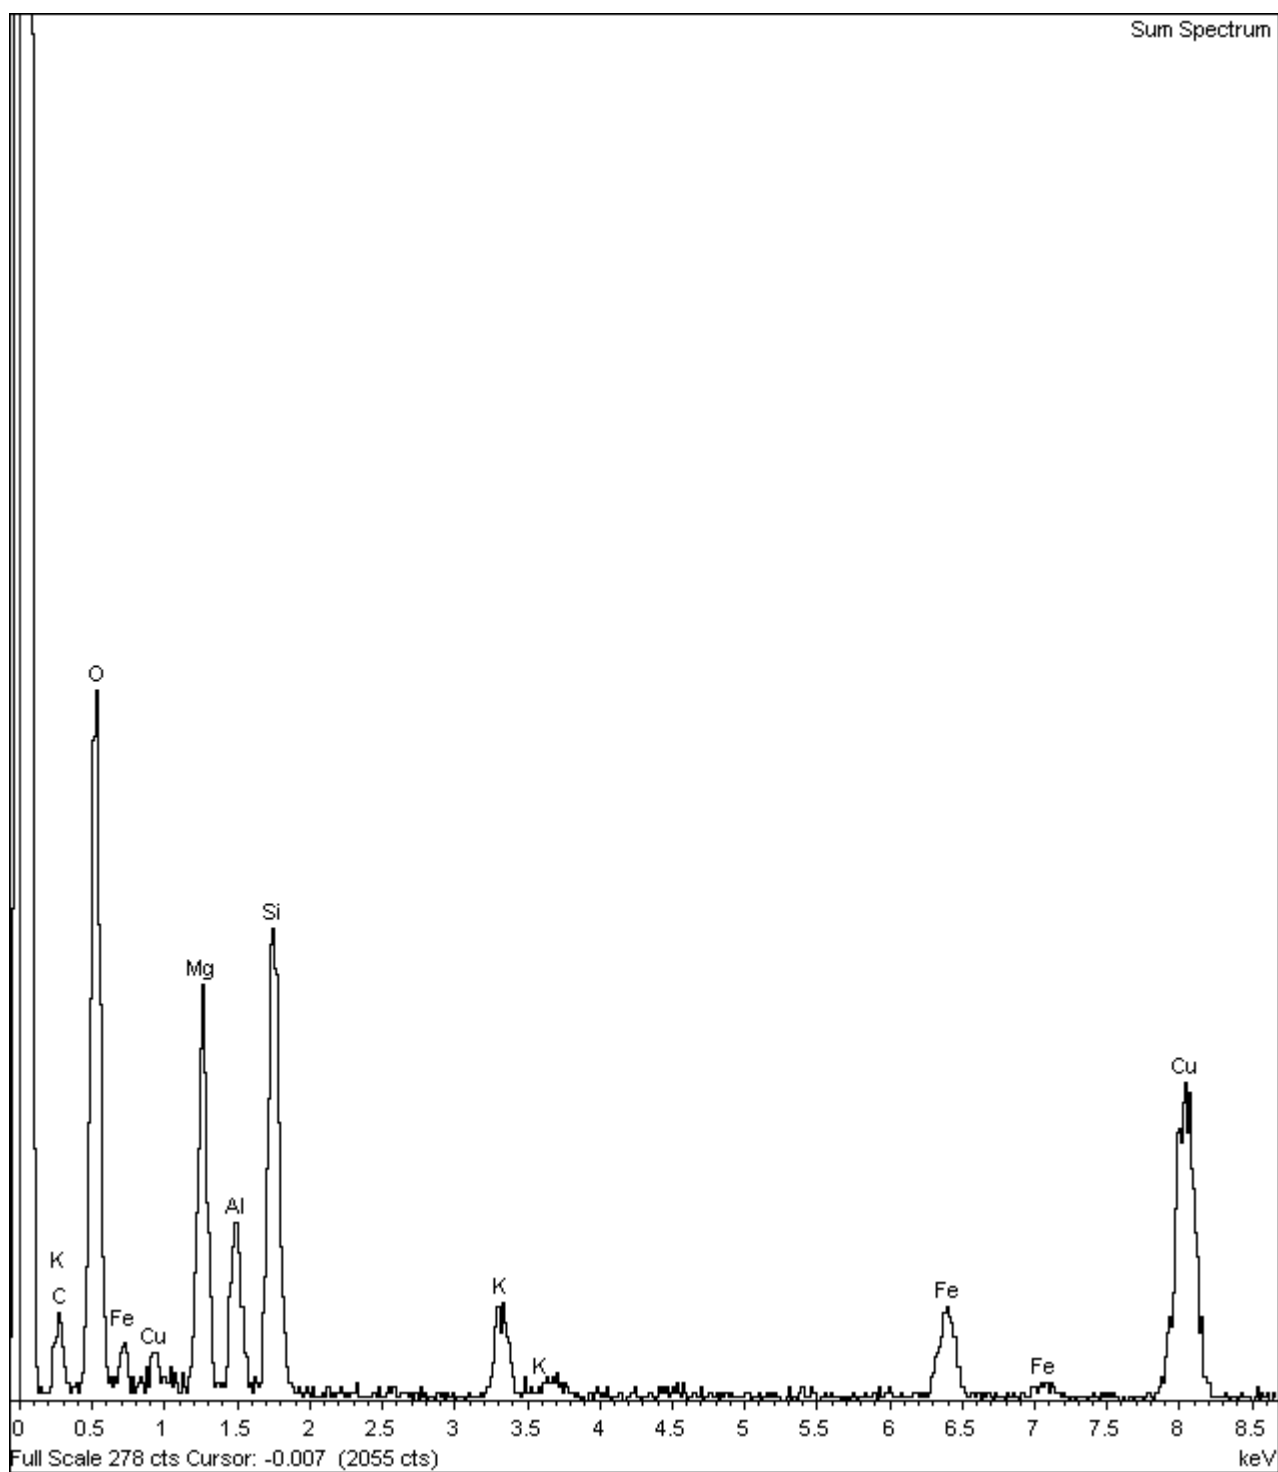

Comment:

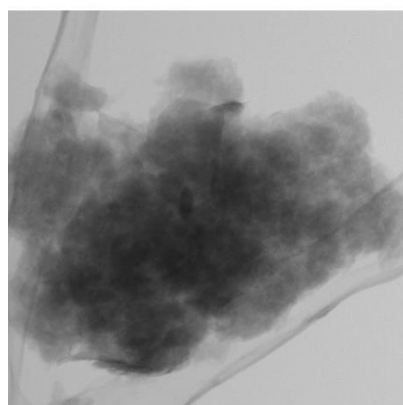

Electron Image 1

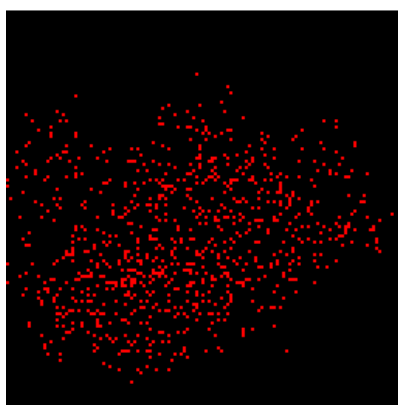

Mg Ka1\_2

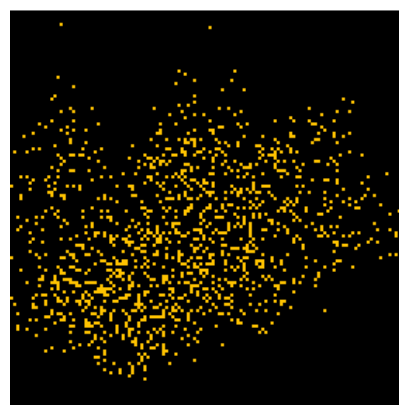

Si Ka1

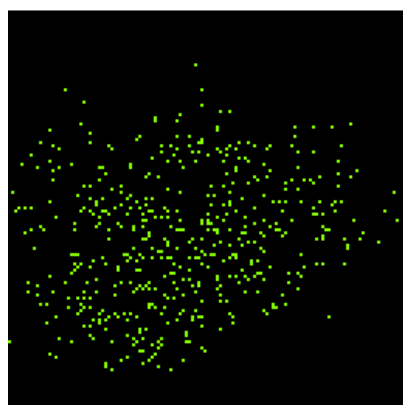

Al Ka1

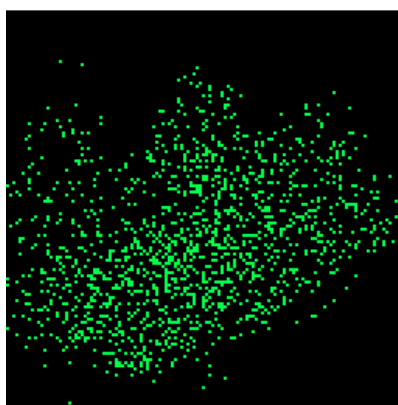

O Ka1

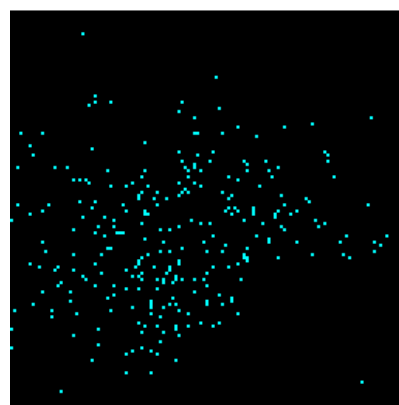

K Ka1

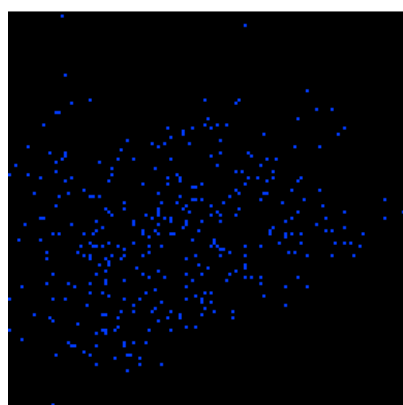

Fe Ka1

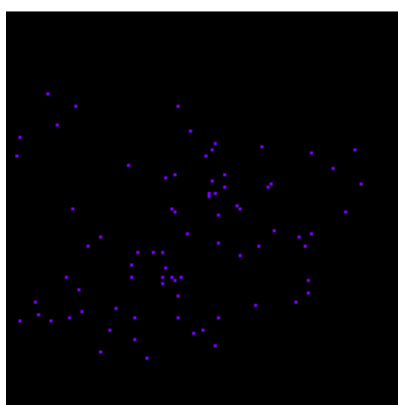

Ca Ka1

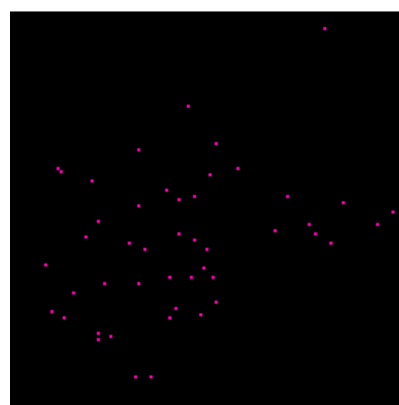

Ti Ka1

Comment:

Project: Project 1

Owner: INCA

Sample: L4E-MW-Ex

Type: Default

Label : Sum Spectrum

Collected : 13-May-2014 02:11 PM

Livetime (s) : 137.63

Real time (s) : 0.00

Detector : X-Max

Window : SATW

Tilt (deg) : 0.0

Elevation (deg) : 17.7

Azimuth (deg) : 0.0

Sample thickness: 0.0 nm

Sample density: 0.00 g/cm3

Spectrum processing :

Peaks possibly omitted : 8.035, 8.893 keV

Quantitation method : Cliff Lorimer thin ratio section.

Processing option : All elements analyzed (Normalised)

Number of iterations = 1

Standardless

| Element | Peak | Area  | k      | Abs   | Weight% | Weight% | Atomic% |
|---------|------|-------|--------|-------|---------|---------|---------|
|         | Area | Sigma | factor | Corn. |         | Sigma   |         |
| O K     | 2090 | 91    | 1.065  | 1.000 | 45.02   | 1.26    | 60.16   |

|        |      |    |       |       |        |      |       |
|--------|------|----|-------|-------|--------|------|-------|
| Mg K   | 1214 | 60 | 0.606 | 1.000 | 14.87  | 0.72 | 13.07 |
| Al K   | 585  | 47 | 0.589 | 1.000 | 6.97   | 0.55 | 5.53  |
| Si K   | 1756 | 73 | 0.569 | 1.000 | 20.21  | 0.82 | 15.39 |
| K K    | 398  | 37 | 0.552 | 1.000 | 4.44   | 0.41 | 2.43  |
| Ca K   | 84   | 23 | 0.542 | 1.000 | 0.93   | 0.25 | 0.49  |
| Ti K   | 42   | 17 | 0.608 | 1.000 | 0.51   | 0.21 | 0.23  |
| Fe K   | 514  | 40 | 0.678 | 1.000 | 7.05   | 0.53 | 2.70  |
| Totals |      |    |       |       | 100.00 |      |       |

Project: Project 1

Owner: INCA

Sample: L4E-MW-Ex

Type: Default

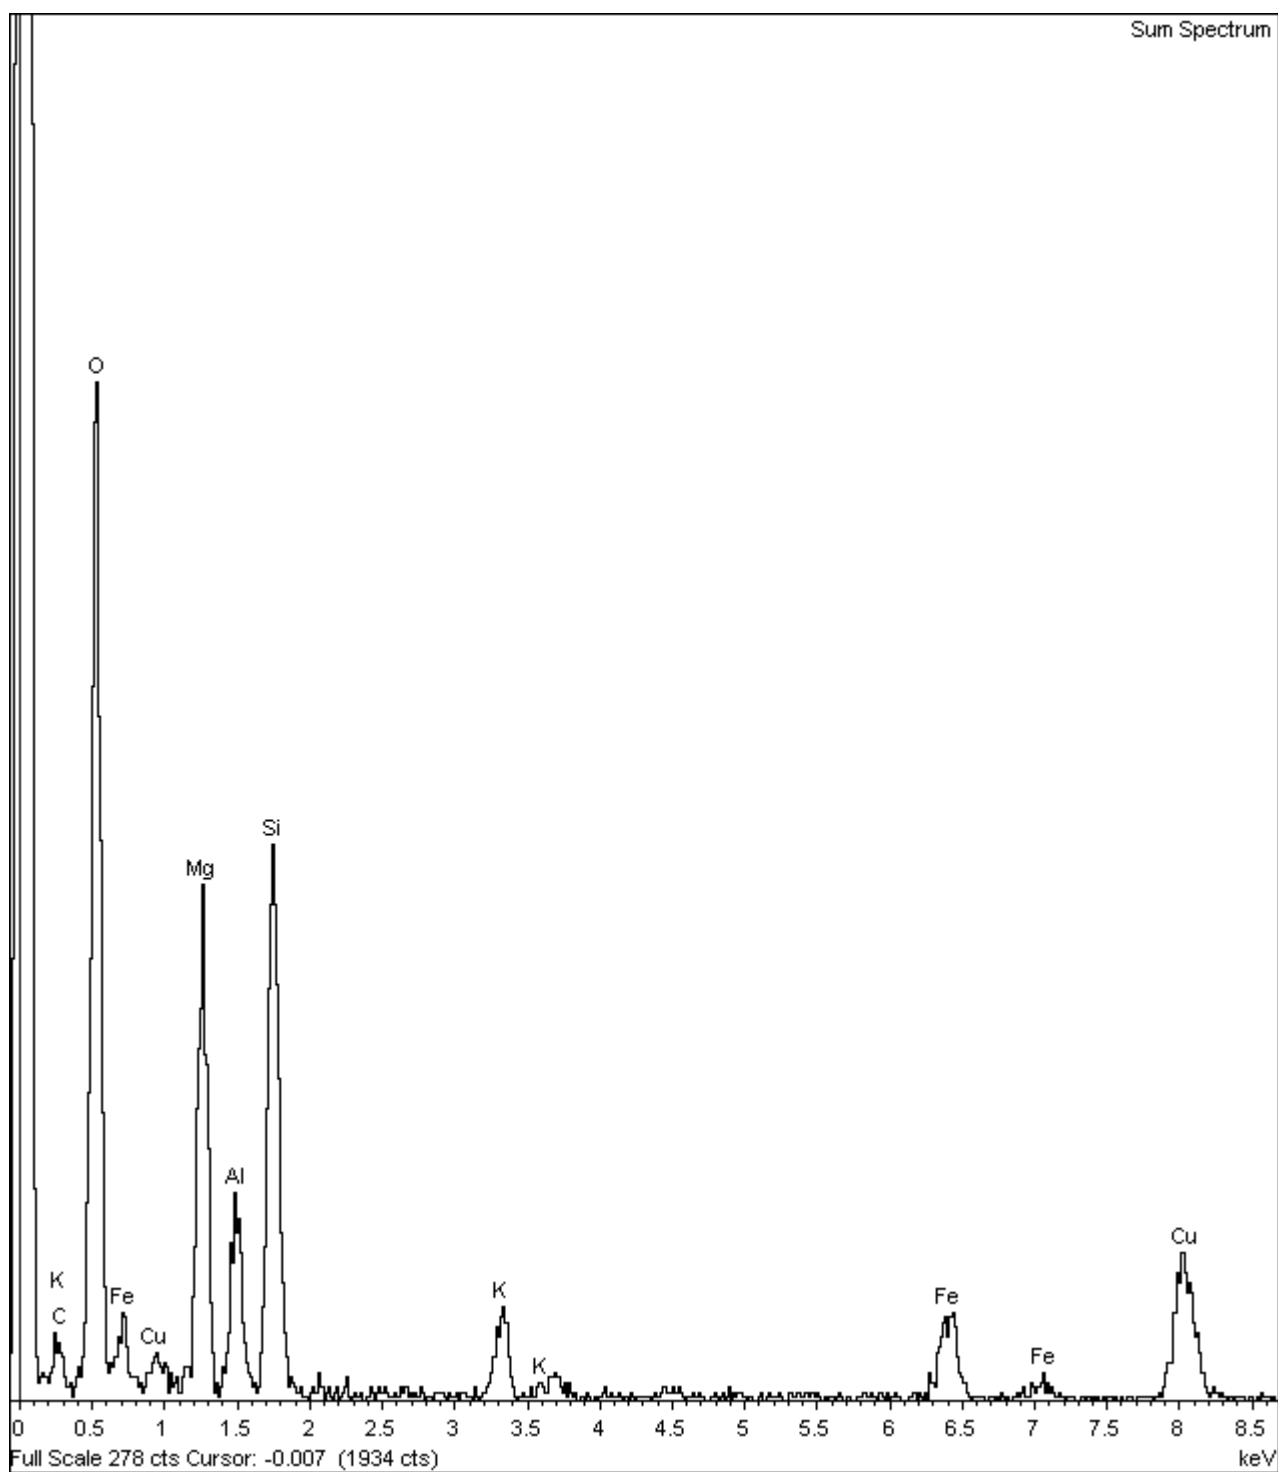

Comment:

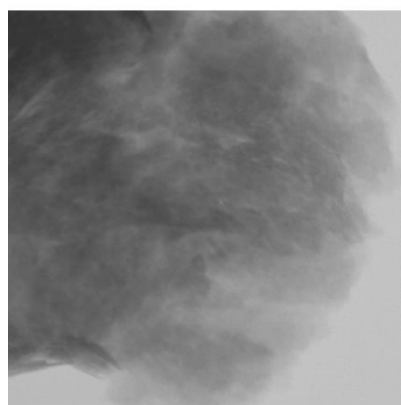

300nm

Electron Image 1

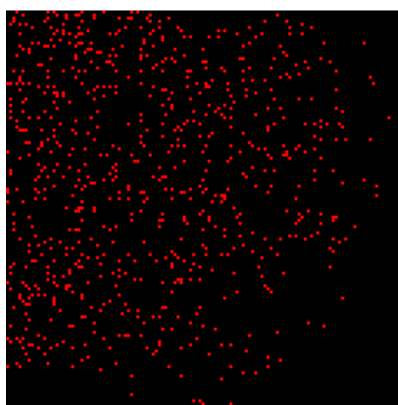

300nm

Mg Ka1\_2

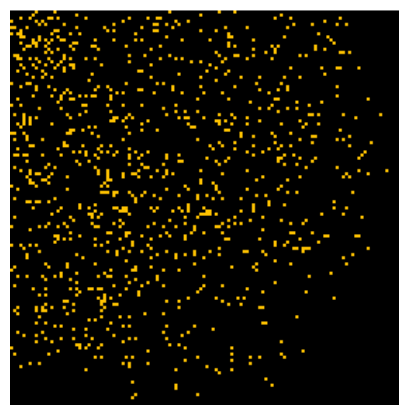

300nm

Si Ka1

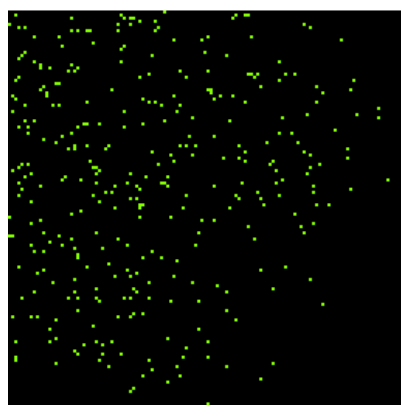

300nm

Al Ka1

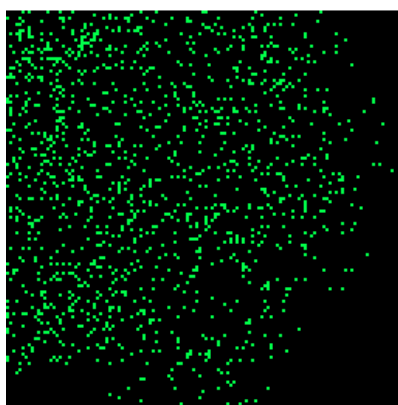

300nm

O Ka1

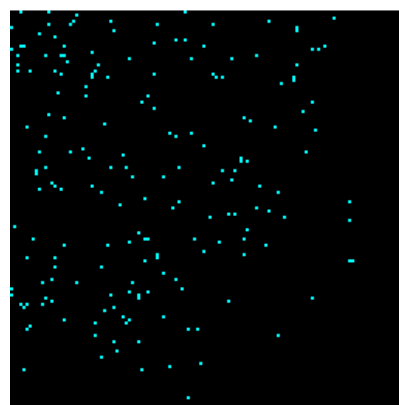

300nm

K Ka1

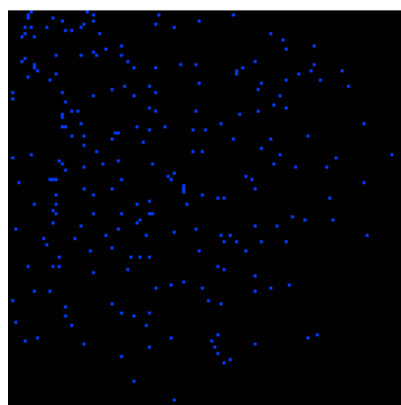

300nm

Fe Ka1

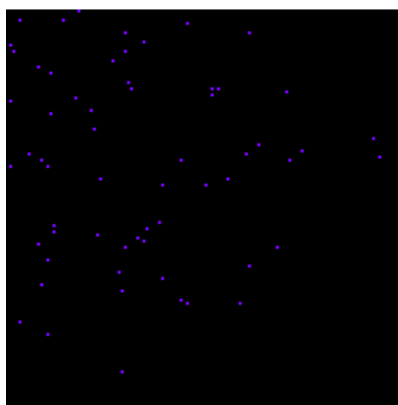

300nm

Ca Ka1

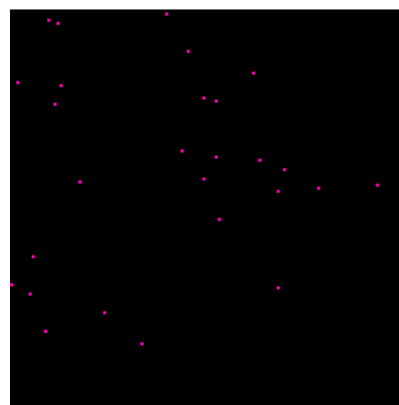

300nm

Ti Ka1

Comment:

Project: Project 1

Owner: INCA

Sample: L4E-MW-Ex

Type: Default

Label : Sum Spectrum

Collected : 13-May-2014 02:17 PM

Livetime (s) : 131.07

Real time (s) : 0.00

Detector : X-Max

Window : SATW

Tilt (deg) : 0.0

Elevation (deg) : 17.7

Azimuth (deg) : 0.0

Sample thickness: 0.0 nm

Sample density: 0.00 g/cm<sup>3</sup>

Spectrum processing :

Peak possibly omitted : 8.029 keV

Quantitation method : Cliff Lorimer thin ratio section.

Processing option : All elements analyzed (Normalised)

Number of iterations = 1

Standardless

| Element | Peak | Area  | k      | Abs   | Weight% | Weight% | Atomic% |
|---------|------|-------|--------|-------|---------|---------|---------|
|         | Area | Sigma | factor | Corn. |         | Sigma   |         |
| O K     | 2803 | 106   | 1.065  | 1.000 | 49.87   | 1.14    | 64.35   |

|        |      |    |       |       |        |      |       |
|--------|------|----|-------|-------|--------|------|-------|
| Mg K   | 1490 | 67 | 0.606 | 1.000 | 15.08  | 0.66 | 12.80 |
| Al K   | 607  | 50 | 0.589 | 1.000 | 5.98   | 0.48 | 4.57  |
| Si K   | 1953 | 78 | 0.569 | 1.000 | 18.57  | 0.73 | 13.65 |
| K K    | 412  | 35 | 0.552 | 1.000 | 3.80   | 0.32 | 2.01  |
| Ca K   | 91   | 22 | 0.542 | 1.000 | 0.82   | 0.20 | 0.42  |
| Ti K   | 26   | 16 | 0.608 | 1.000 | 0.26   | 0.17 | 0.11  |
| Fe K   | 497  | 39 | 0.678 | 1.000 | 5.62   | 0.44 | 2.08  |
| Totals |      |    |       |       | 100.00 |      |       |



Project: Project 1

Owner: INCA

Sample: L4E-MW-Ex

Type: Default

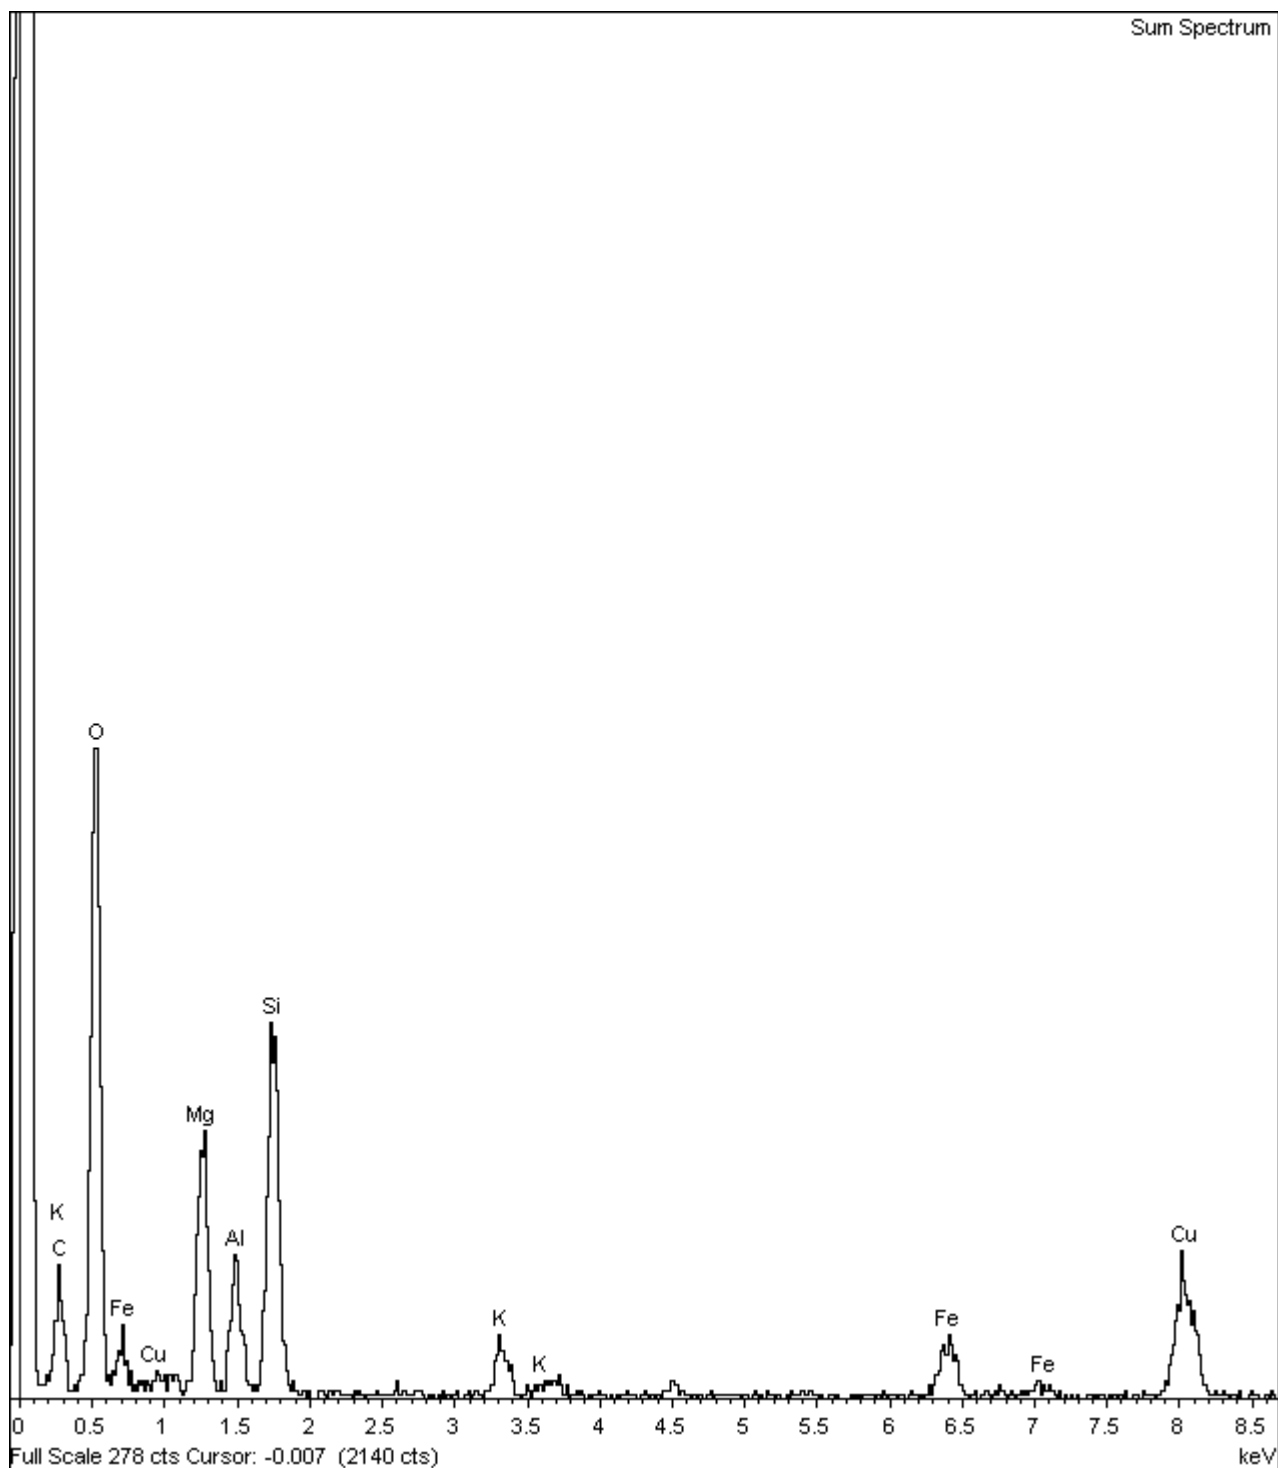

Comment:

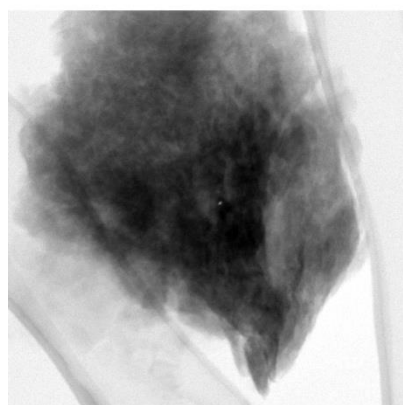

300nm

Electron Image 1

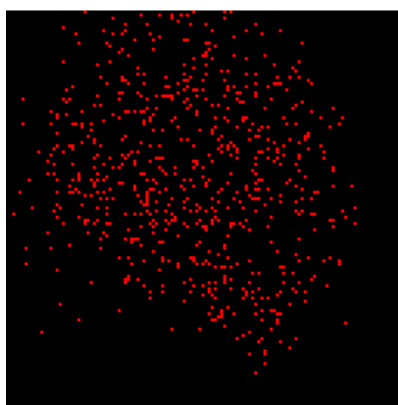

300nm

Mg Ka1\_2

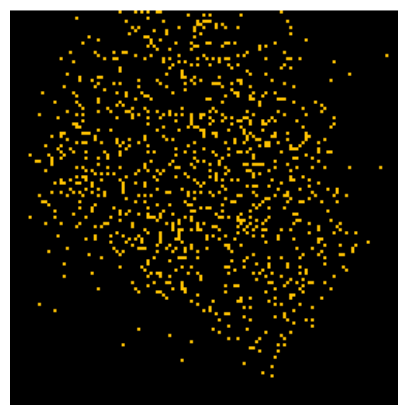

300nm

Si Ka1

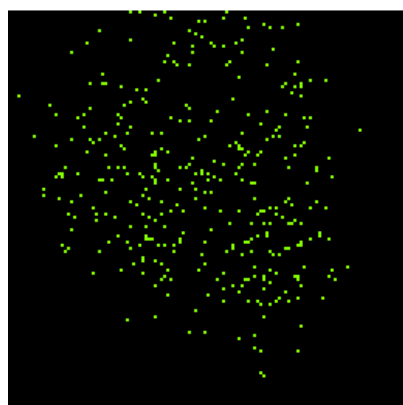

300nm

Al Ka1

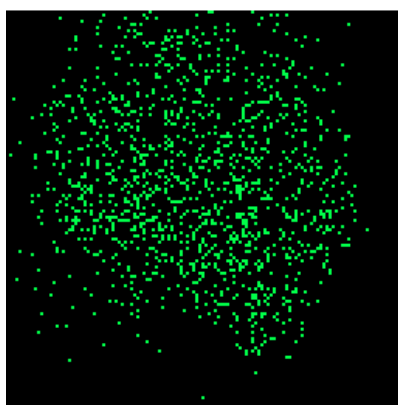

300nm

O Ka1

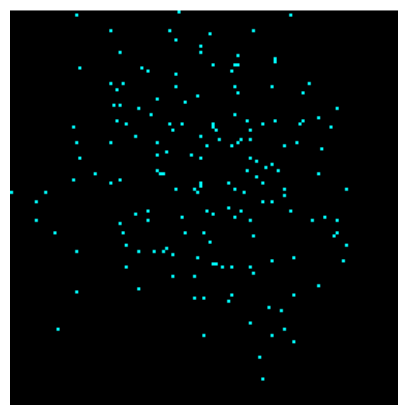

300nm

K Ka1

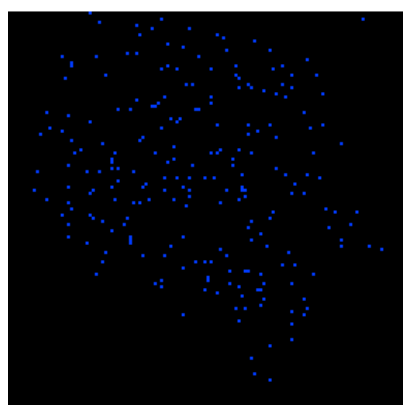

300nm

Fe Ka1

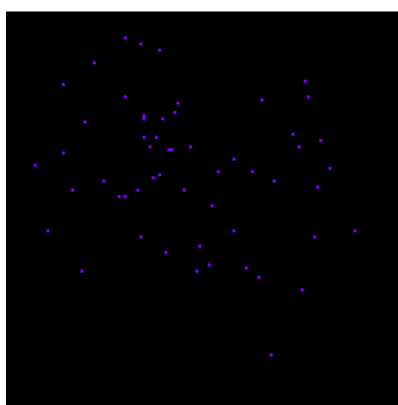

300nm

Ca Ka1

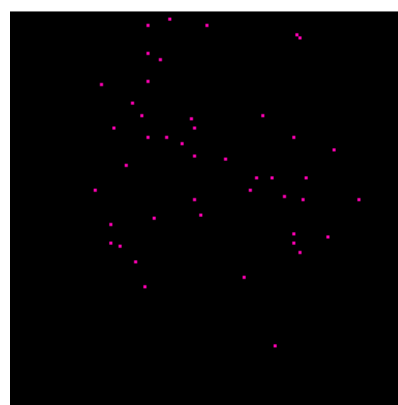

300nm

Ti Ka1

Comment:

Project: Project 1

Owner: INCA

Sample: L4E-MW-Ex

Type: Default

Label : Sum Spectrum

Collected : 13-May-2014 02:24 PM

Livetime (s) : 137.63

Real time (s) : 0.00

Detector : X-Max

Window : SATW

Tilt (deg) : 0.0

Elevation (deg) : 17.7

Azimuth (deg) : 0.0

Sample thickness: 0.0 nm

Sample density: 0.00 g/cm3

Spectrum processing :

Peak possibly omitted : 8.034 keV

Quantitation method : Cliff Lorimer thin ratio section.

Processing option : All elements analyzed (Normalised)

Number of iterations = 1

Standardless

| Element | Peak | Area  | k      | Abs    | Weight% | Weight% | Atomic% |
|---------|------|-------|--------|--------|---------|---------|---------|
|         | Area | Sigma | factor | Corrn. |         | Sigma   |         |
| O K     | 1952 | 85    | 1.065  | 1.000  | 51.39   | 1.35    | 66.06   |

|        |      |    |       |       |        |      |       |
|--------|------|----|-------|-------|--------|------|-------|
| Mg K   | 843  | 53 | 0.606 | 1.000 | 12.62  | 0.77 | 10.68 |
| Al K   | 428  | 41 | 0.589 | 1.000 | 6.24   | 0.59 | 4.75  |
| Si K   | 1328 | 65 | 0.569 | 1.000 | 18.69  | 0.88 | 13.69 |
| K K    | 266  | 29 | 0.552 | 1.000 | 3.64   | 0.40 | 1.91  |
| Ca K   | 56   | 19 | 0.542 | 1.000 | 0.75   | 0.26 | 0.38  |
| Ti K   | 71   | 17 | 0.608 | 1.000 | 1.07   | 0.25 | 0.46  |
| Fe K   | 335  | 31 | 0.678 | 1.000 | 5.61   | 0.51 | 2.07  |
| Totals |      |    |       |       | 100.00 |      |       |
