# Supplementary material for: Heterogeneous Distribution of Interlayer Cations and Iron as a Plausible Explanation of the Non-Exfoliation of Commercial Vermiculites Post Alcohol Treatment and Microwave Irradiation
Source: MDPI journal article supplement (doi:10.3390/min11080835), 2021-08-01
Supplement: s1 [file s1]

Project: Project 1

Owner: INCA

Sample: CHG-4B-MW-Ex

Type: Default

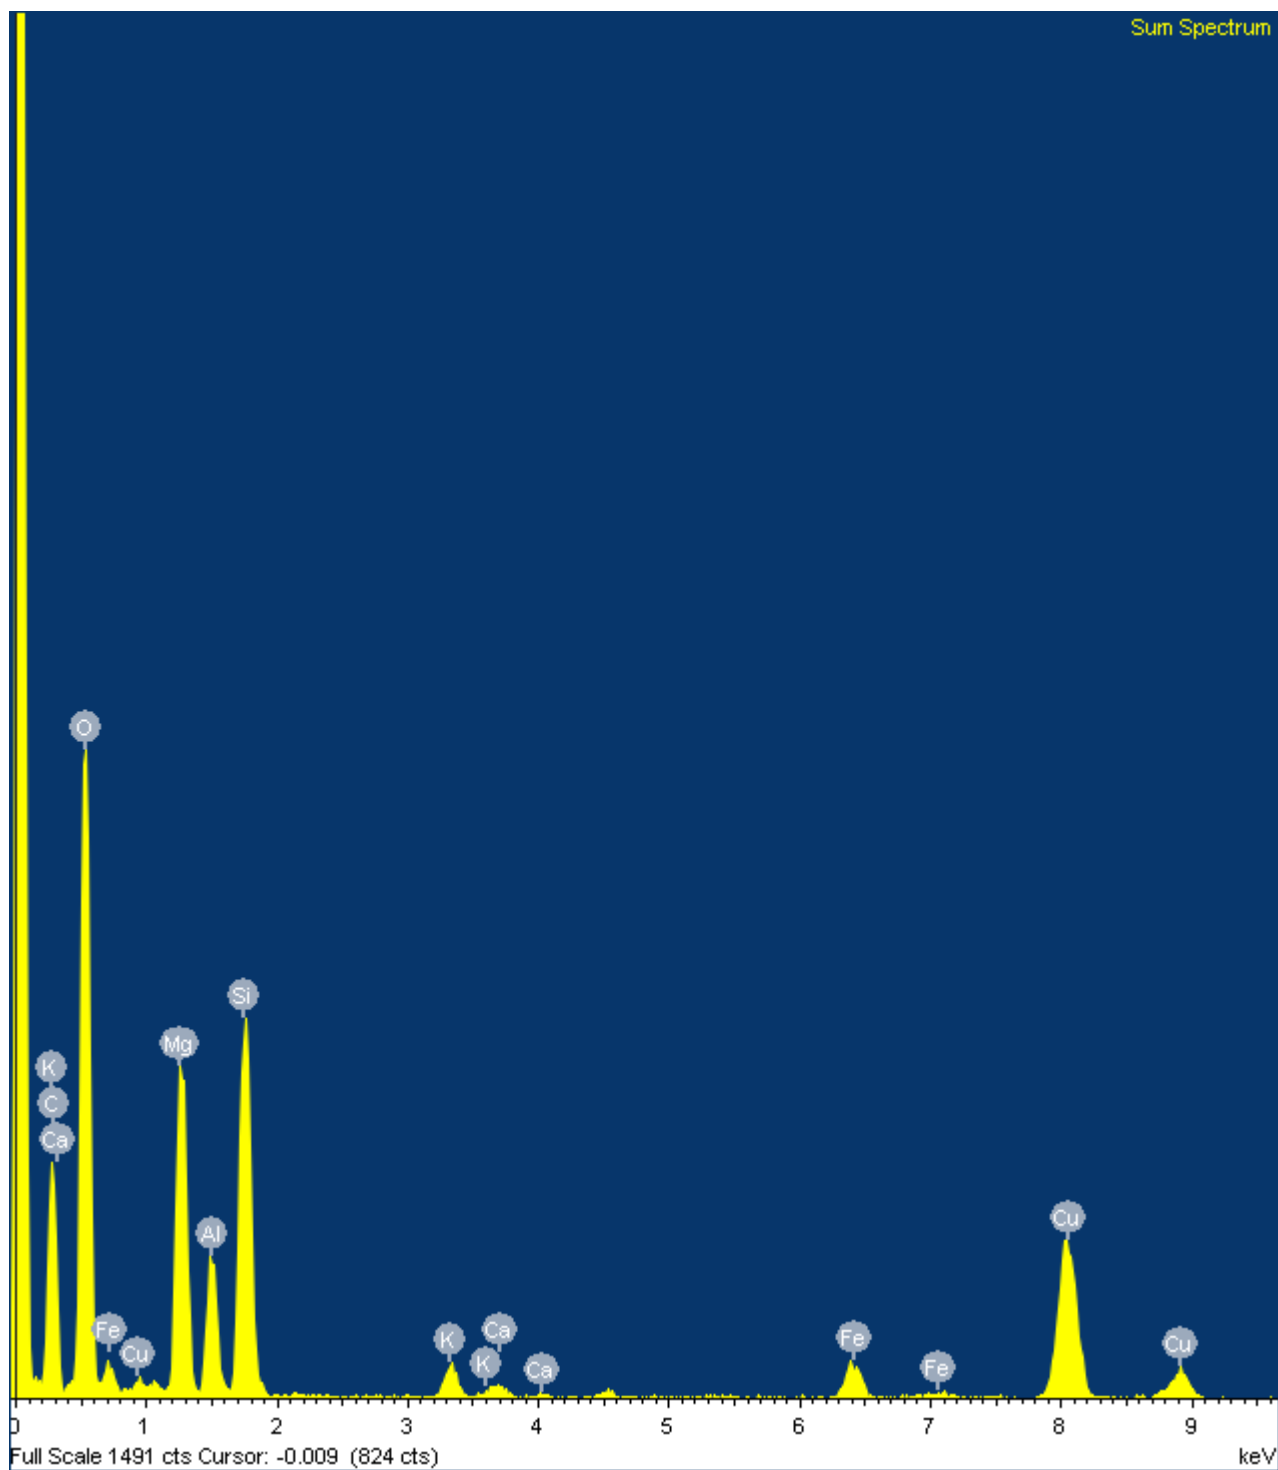

Comment:

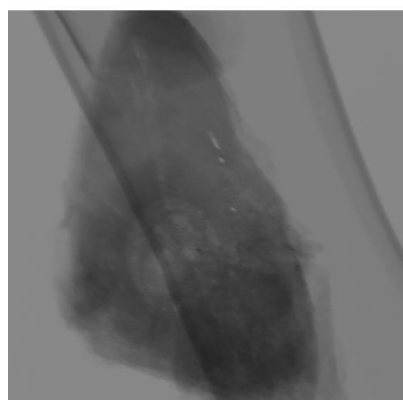

300nm Electron Image 1

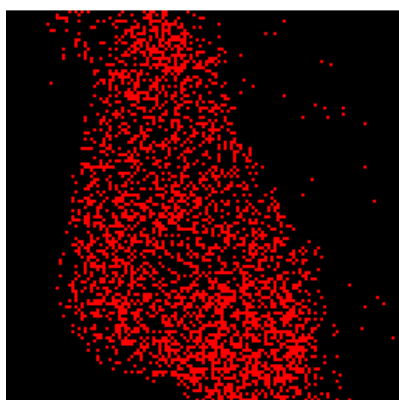

300nm O Ka1

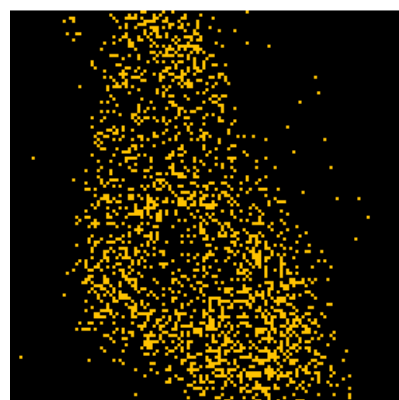

300nm Mg Ka1\_2

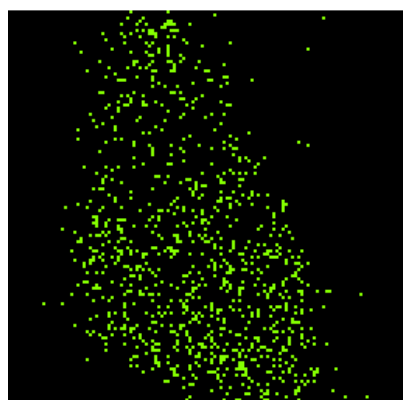

300nm Al Ka1

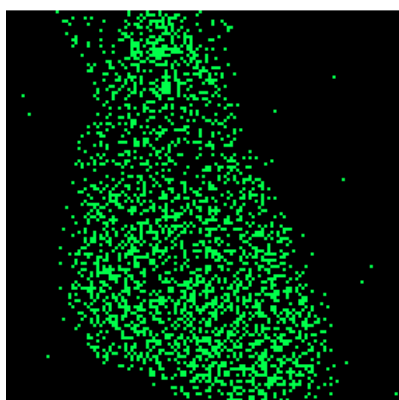

300nm Si Ka1

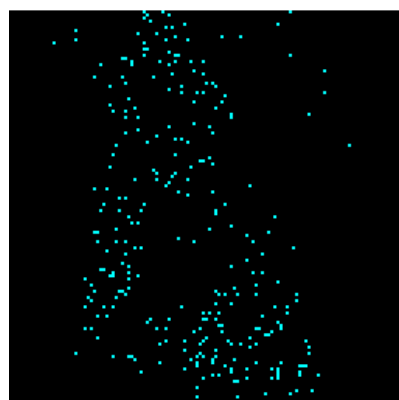

300nm K Ka1

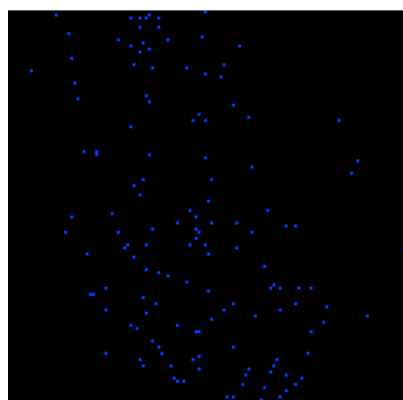

300nm Ca Ka1

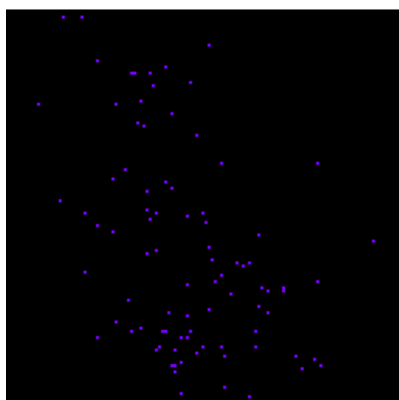

300nm Ti Ka1

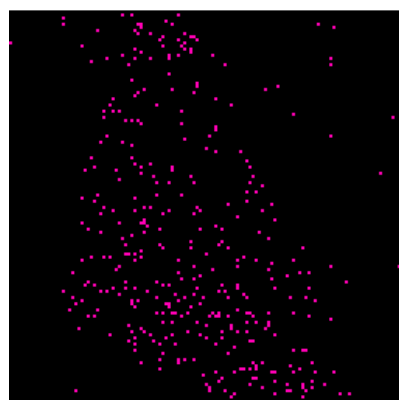

300nm Fe Ka1

Comment:

Project: Project 1

Owner: INCA

Sample: CHG-4B-MW-Ex

Type: Default

| Element | Peak  | Area  | k      | Abs   | Weight% | Weight% | Atomic% |
|---------|-------|-------|--------|-------|---------|---------|---------|
|         | Area  | Sigma | factor | Corn. |         | Sigma   |         |
| O K     | 10546 | 189   | 1.065  | 1.000 | 50.90   | 0.56    | 64.44   |
| Mg K    | 5913  | 137   | 0.606  | 1.000 | 16.23   | 0.36    | 13.52   |
| Al K    | 2546  | 100   | 0.589  | 1.000 | 6.80    | 0.26    | 5.11    |
| Si K    | 7611  | 157   | 0.569  | 1.000 | 19.63   | 0.39    | 14.16   |
| K K     | 789   | 57    | 0.552  | 1.000 | 1.97    | 0.14    | 1.02    |
| Ca K    | 290   | 41    | 0.542  | 1.000 | 0.71    | 0.10    | 0.36    |
| Ti K    | 167   | 33    | 0.608  | 1.000 | 0.46    | 0.09    | 0.19    |
| Fe K    | 1073  | 60    | 0.678  | 1.000 | 3.30    | 0.18    | 1.20    |
| Totals  |       |       |        |       | 100.00  |         |         |

Project: Project 1

Owner: INCA

Sample: CHG-4B-MW-Ex

Type: Default

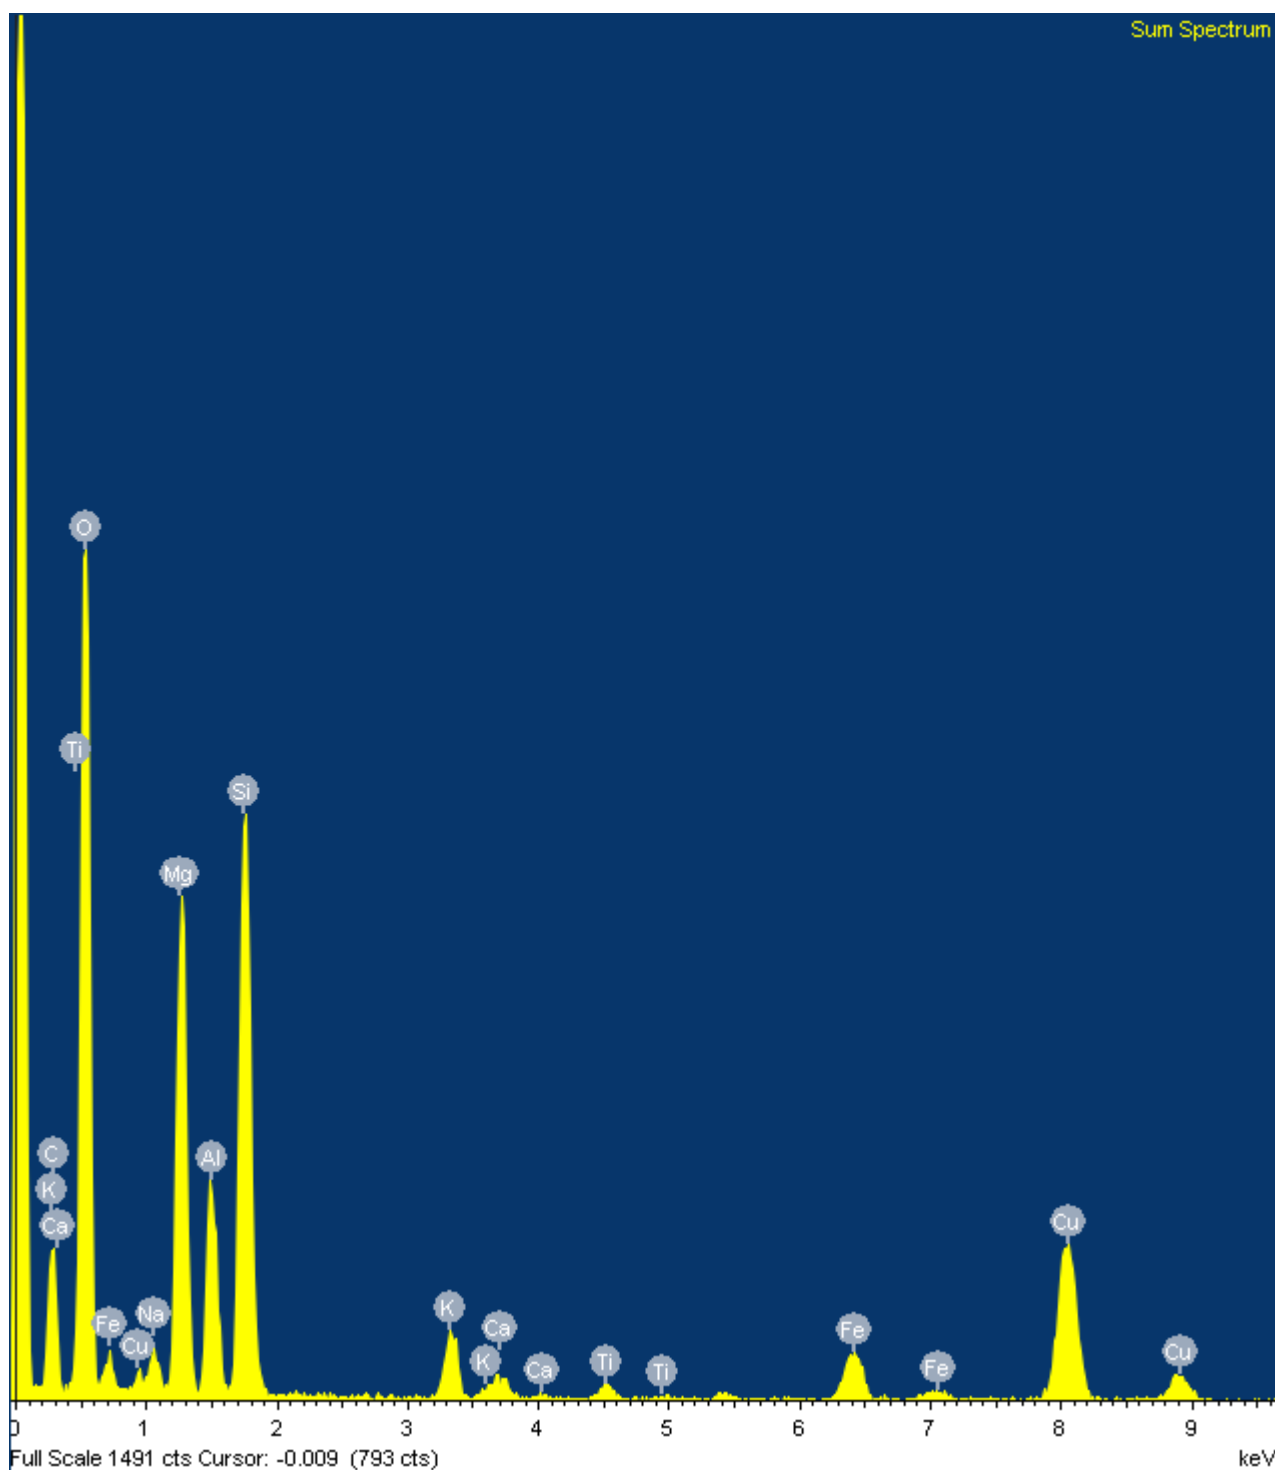

Comment:

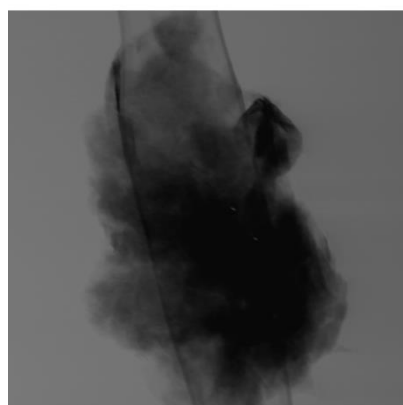

700nm

Electron Image 1

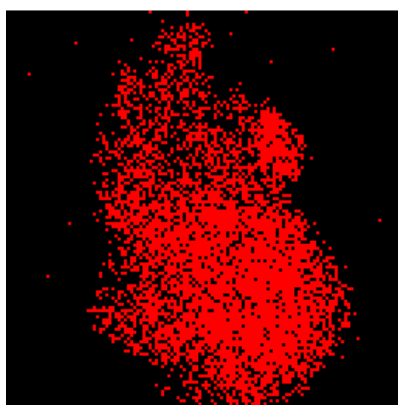

700nm

O Ka1

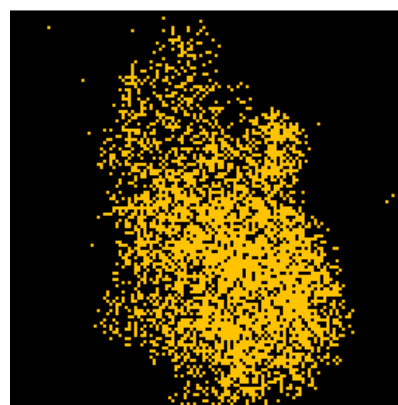

700nm

Mg Ka1\_2

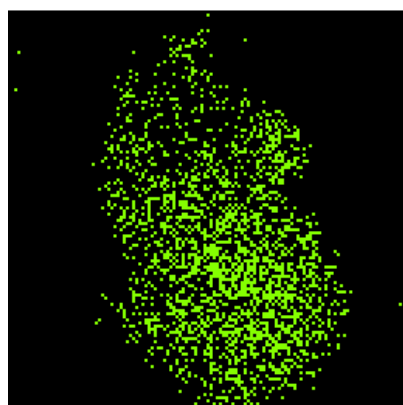

700nm

Al Ka1

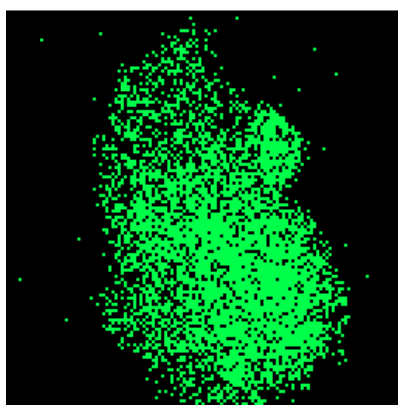

700nm

Si Ka1

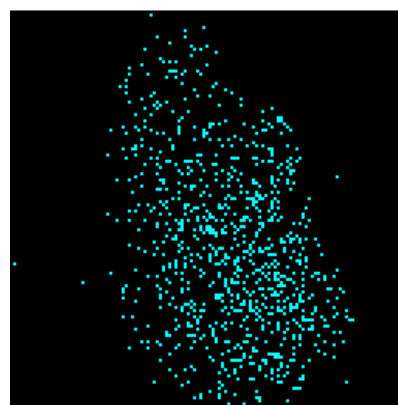

700nm

K Ka1

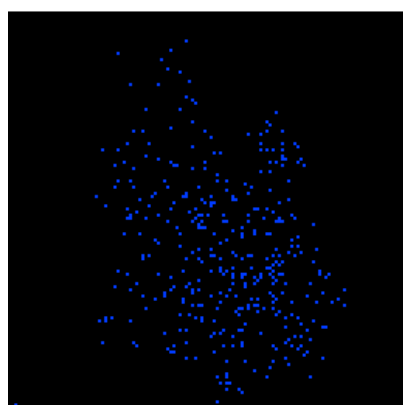

700nm

Ca Ka1

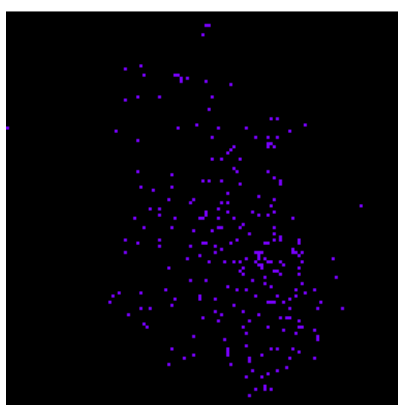

700nm

Ti Ka1

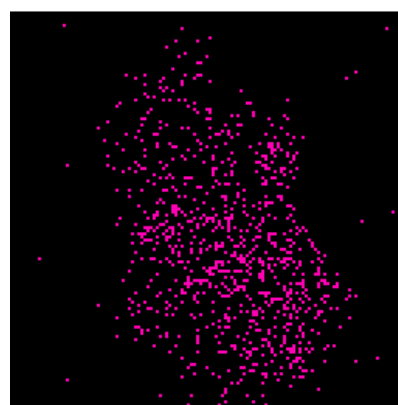

700nm

Fe Ka1

Comment:

Project: Project 1

Owner: INCA

Sample: CHG-4B-MW-Ex

Type: Default

| Element | Peak  | Area  | k      | Abs   | Weight% | Weight% | Atomic% |
|---------|-------|-------|--------|-------|---------|---------|---------|
|         | Area  | Sigma | factor | Corn. |         | Sigma   |         |
| O K     | 13858 | 217   | 1.065  | 1.000 | 46.98   | 0.47    | 60.97   |
| Mg K    | 8908  | 165   | 0.606  | 1.000 | 17.18   | 0.30    | 14.67   |
| Al K    | 3754  | 121   | 0.589  | 1.000 | 7.04    | 0.22    | 5.42    |
| Si K    | 11355 | 189   | 0.569  | 1.000 | 20.57   | 0.33    | 15.21   |
| K K     | 1793  | 78    | 0.552  | 1.000 | 3.15    | 0.14    | 1.67    |
| Ca K    | 524   | 55    | 0.542  | 1.000 | 0.91    | 0.09    | 0.47    |
| Ti K    | 384   | 43    | 0.608  | 1.000 | 0.74    | 0.08    | 0.32    |
| Fe K    | 1587  | 74    | 0.678  | 1.000 | 3.42    | 0.16    | 1.27    |
| Totals  |       |       |        |       | 100.00  |         |         |

Project: Project 1

Owner: INCA

Sample: CHG-4B-MW-Ex

Type: Default

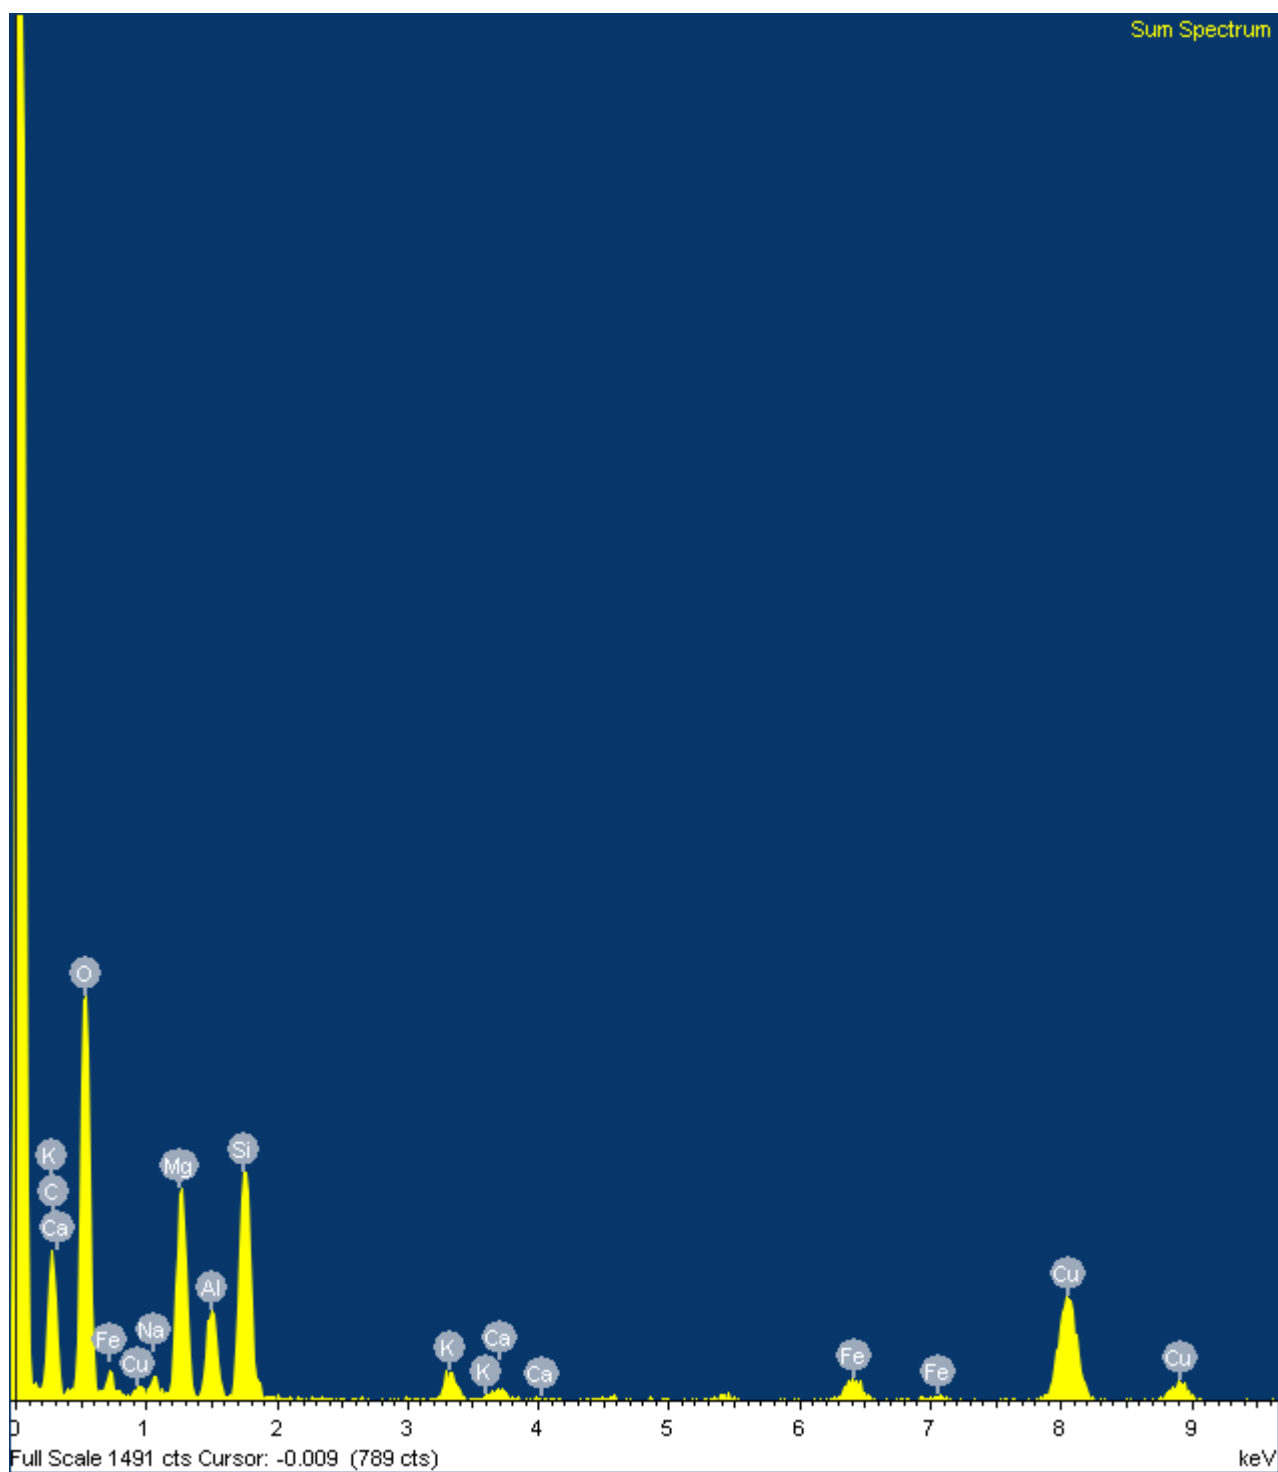

Comment:

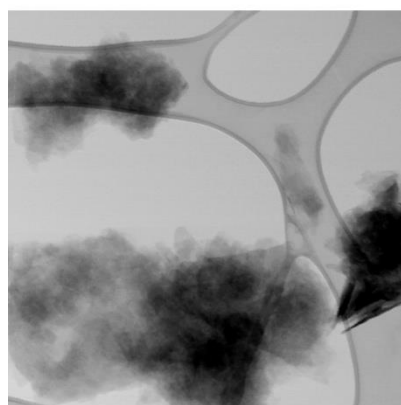

600nm Electron Image 1

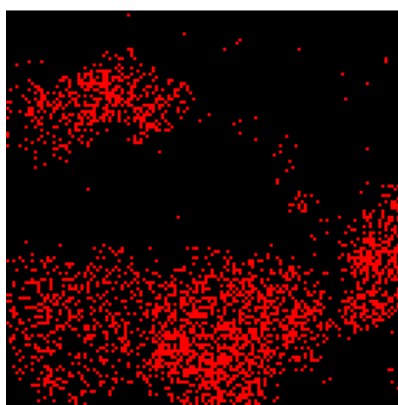

600nm O Ka1

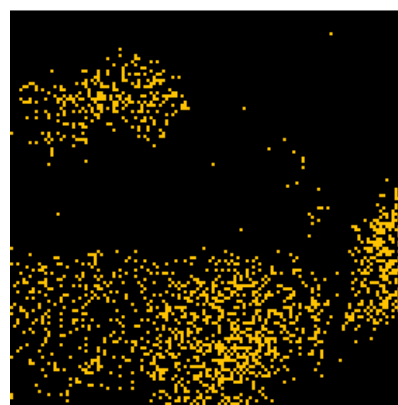

600nm Mg Ka1\_2

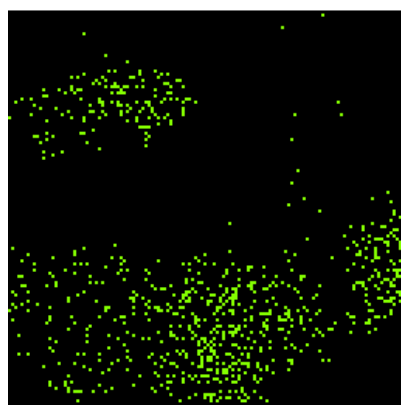

600nm Al Ka1

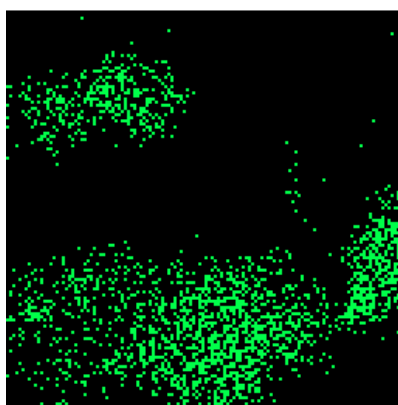

600nm Si Ka1

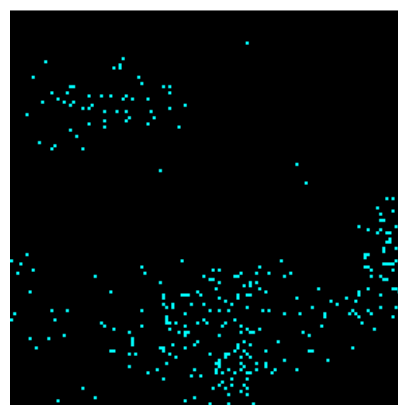

600nm K Ka1

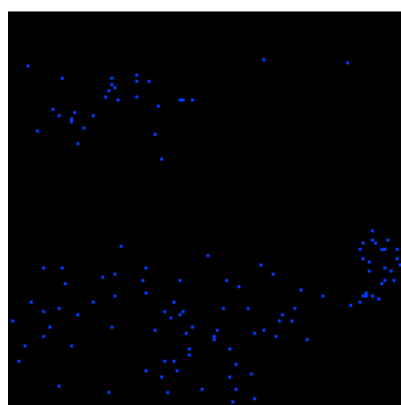

600nm Ca Ka1

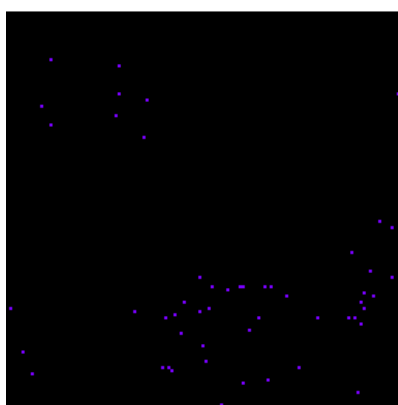

600nm Ti Ka1

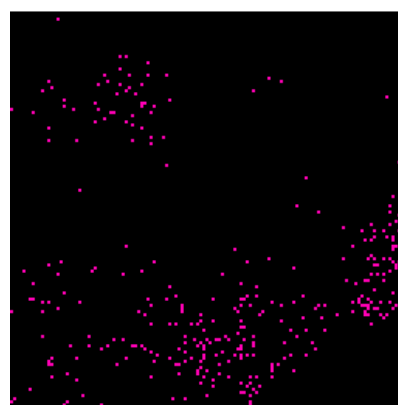

600nm Fe Ka1

Comment:



Project: Project 1

Owner: INCA

Sample: CHG-4B-MW-Ex

Type: Default

| Element | Peak | Area  | k      | Abs    | Weight% | Weight% | Atomic% |
|---------|------|-------|--------|--------|---------|---------|---------|
|         | Area | Sigma | factor | Corrn. |         | Sigma   |         |
| O K     | 6795 | 152   | 1.065  | 1.000  | 51.56   | 0.70    | 65.10   |
| Mg K    | 3662 | 108   | 0.606  | 1.000  | 15.80   | 0.45    | 13.13   |
| Al K    | 1618 | 79    | 0.589  | 1.000  | 6.80    | 0.32    | 5.09    |
| Si K    | 4674 | 122   | 0.569  | 1.000  | 18.96   | 0.47    | 13.63   |
| K K     | 688  | 50    | 0.552  | 1.000  | 2.70    | 0.20    | 1.40    |
| Ca K    | 212  | 36    | 0.542  | 1.000  | 0.82    | 0.14    | 0.41    |
| Ti K    | 75   | 25    | 0.608  | 1.000  | 0.33    | 0.11    | 0.14    |
| Fe K    | 628  | 48    | 0.678  | 1.000  | 3.03    | 0.23    | 1.10    |
| Totals  |      |       |        |        | 100.00  |         |         |

Project: Project 1

Owner: INCA

Sample: CHG-4B-MW-Ex

Type: Default

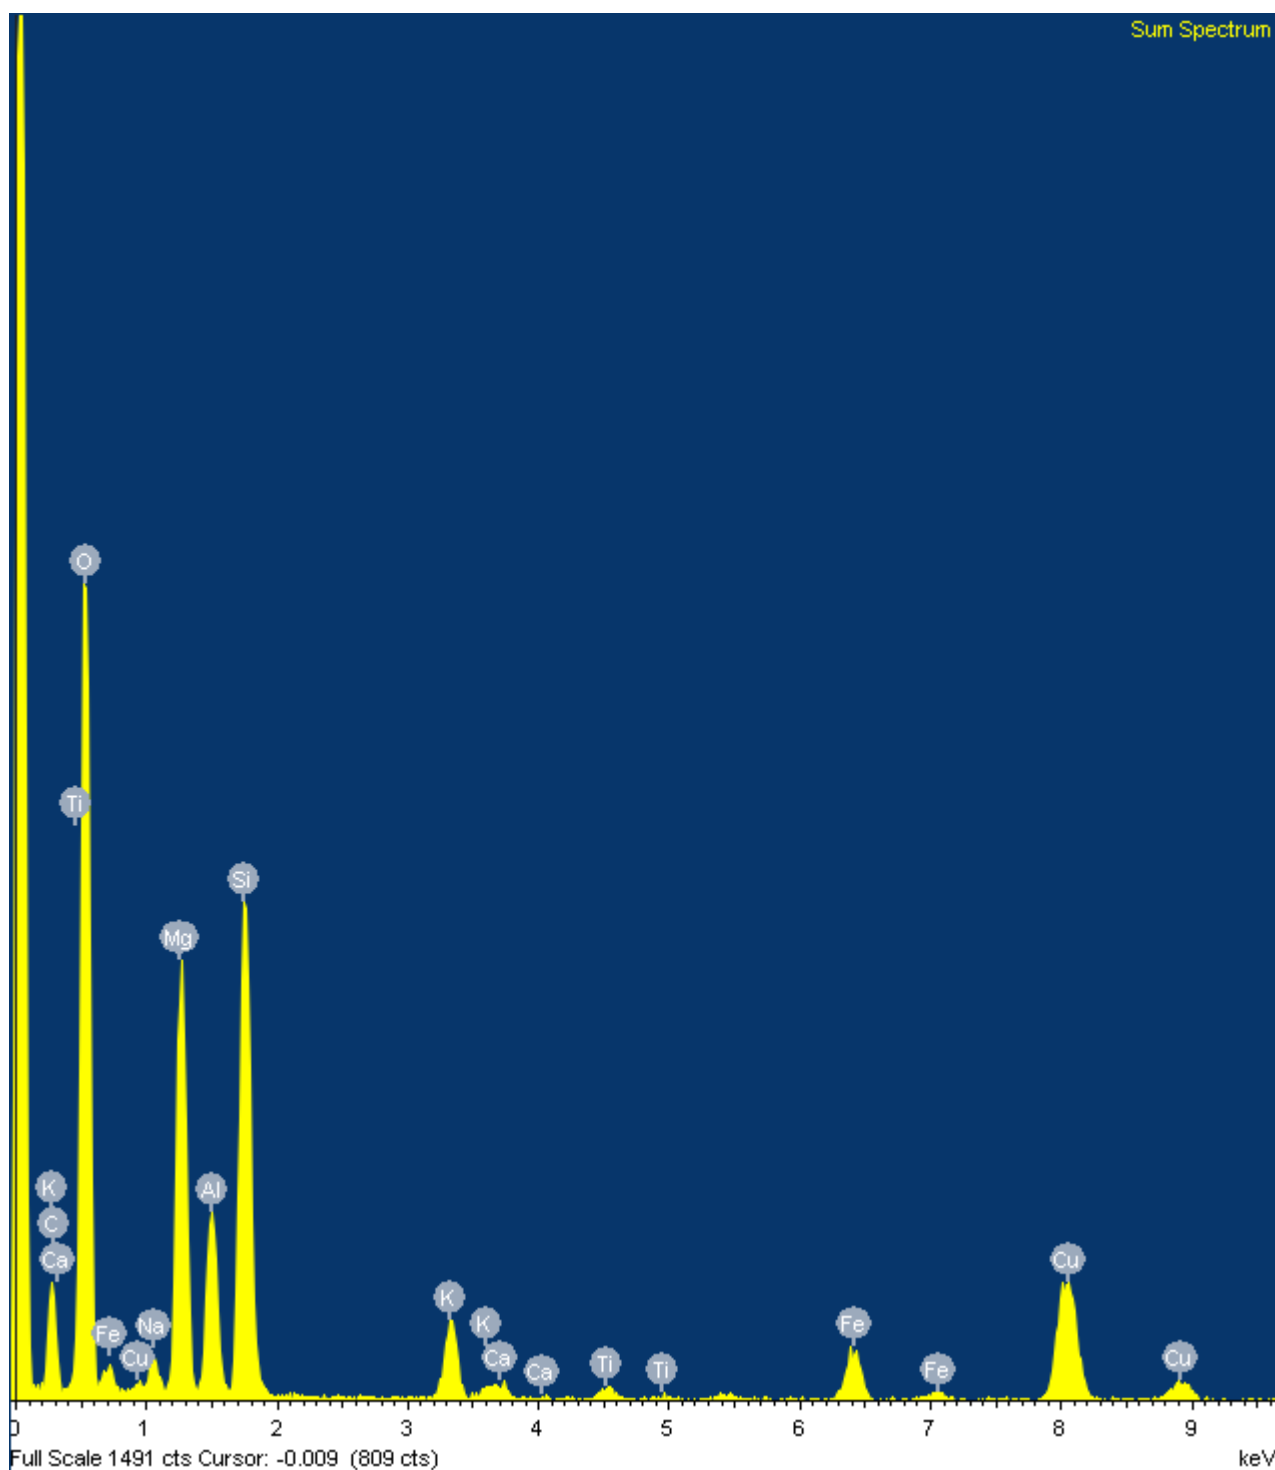

Comment:

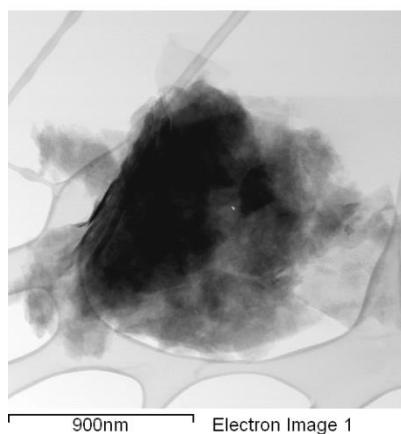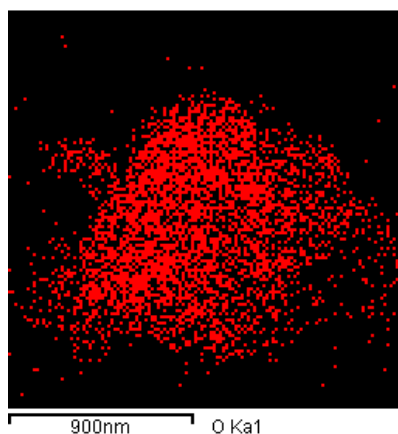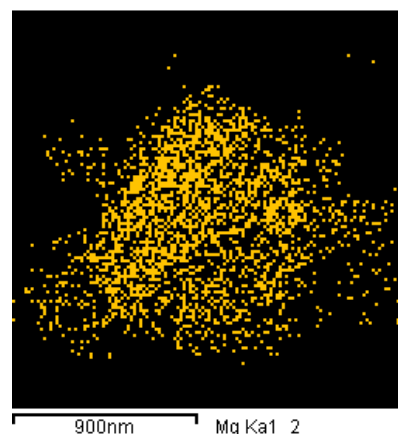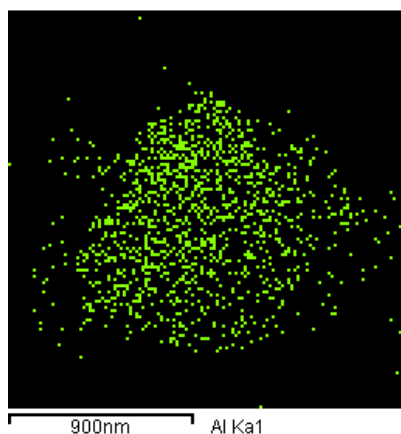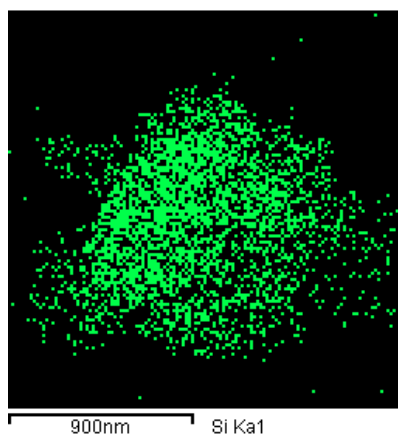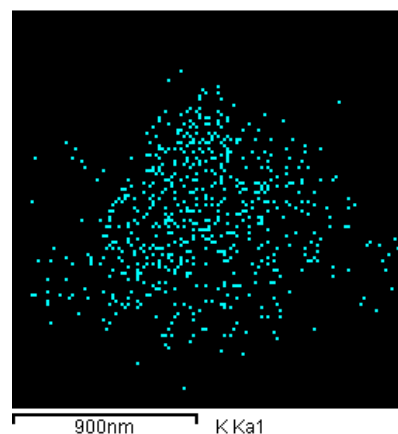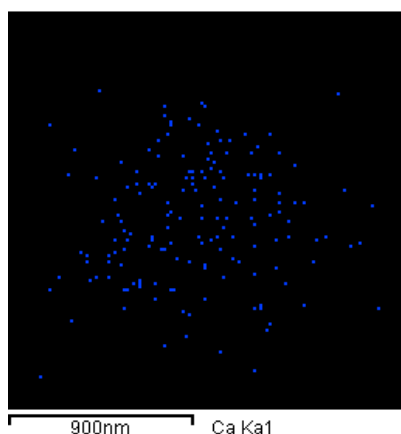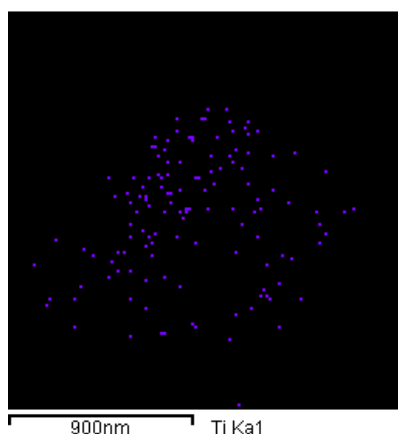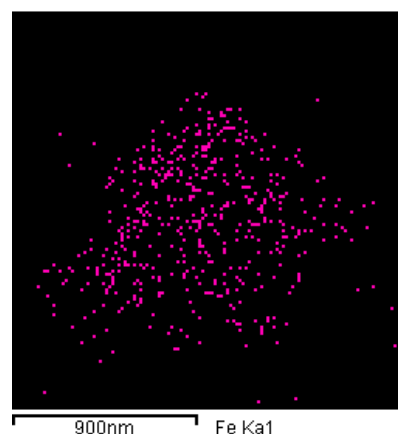

Comment:

Project: Project 1

Owner: INCA

Sample: CHG-4B-MW-Ex

Type: Default

| Element | Peak  | Area  | k      | Abs   | Weight% | Weight% | Atomic% |
|---------|-------|-------|--------|-------|---------|---------|---------|
|         | Area  | Sigma | factor | Corn. |         | Sigma   |         |
| O K     | 12908 | 210   | 1.065  | 1.000 | 48.35   | 0.50    | 62.42   |
| Mg K    | 7741  | 155   | 0.606  | 1.000 | 16.49   | 0.32    | 14.01   |
| Al K    | 3227  | 115   | 0.589  | 1.000 | 6.69    | 0.23    | 5.12    |
| Si K    | 9784  | 176   | 0.569  | 1.000 | 19.58   | 0.34    | 14.40   |
| K K     | 2012  | 82    | 0.552  | 1.000 | 3.90    | 0.16    | 2.06    |
| Ca K    | 328   | 48    | 0.542  | 1.000 | 0.63    | 0.09    | 0.32    |
| Ti K    | 337   | 41    | 0.608  | 1.000 | 0.72    | 0.09    | 0.31    |
| Fe K    | 1528  | 68    | 0.678  | 1.000 | 3.64    | 0.16    | 1.35    |
| Totals  |       |       |        |       | 100.00  |         |         |

Project: Project 1

Owner: INCA

Sample: CHG-4B-MW-Ex

Type: Default

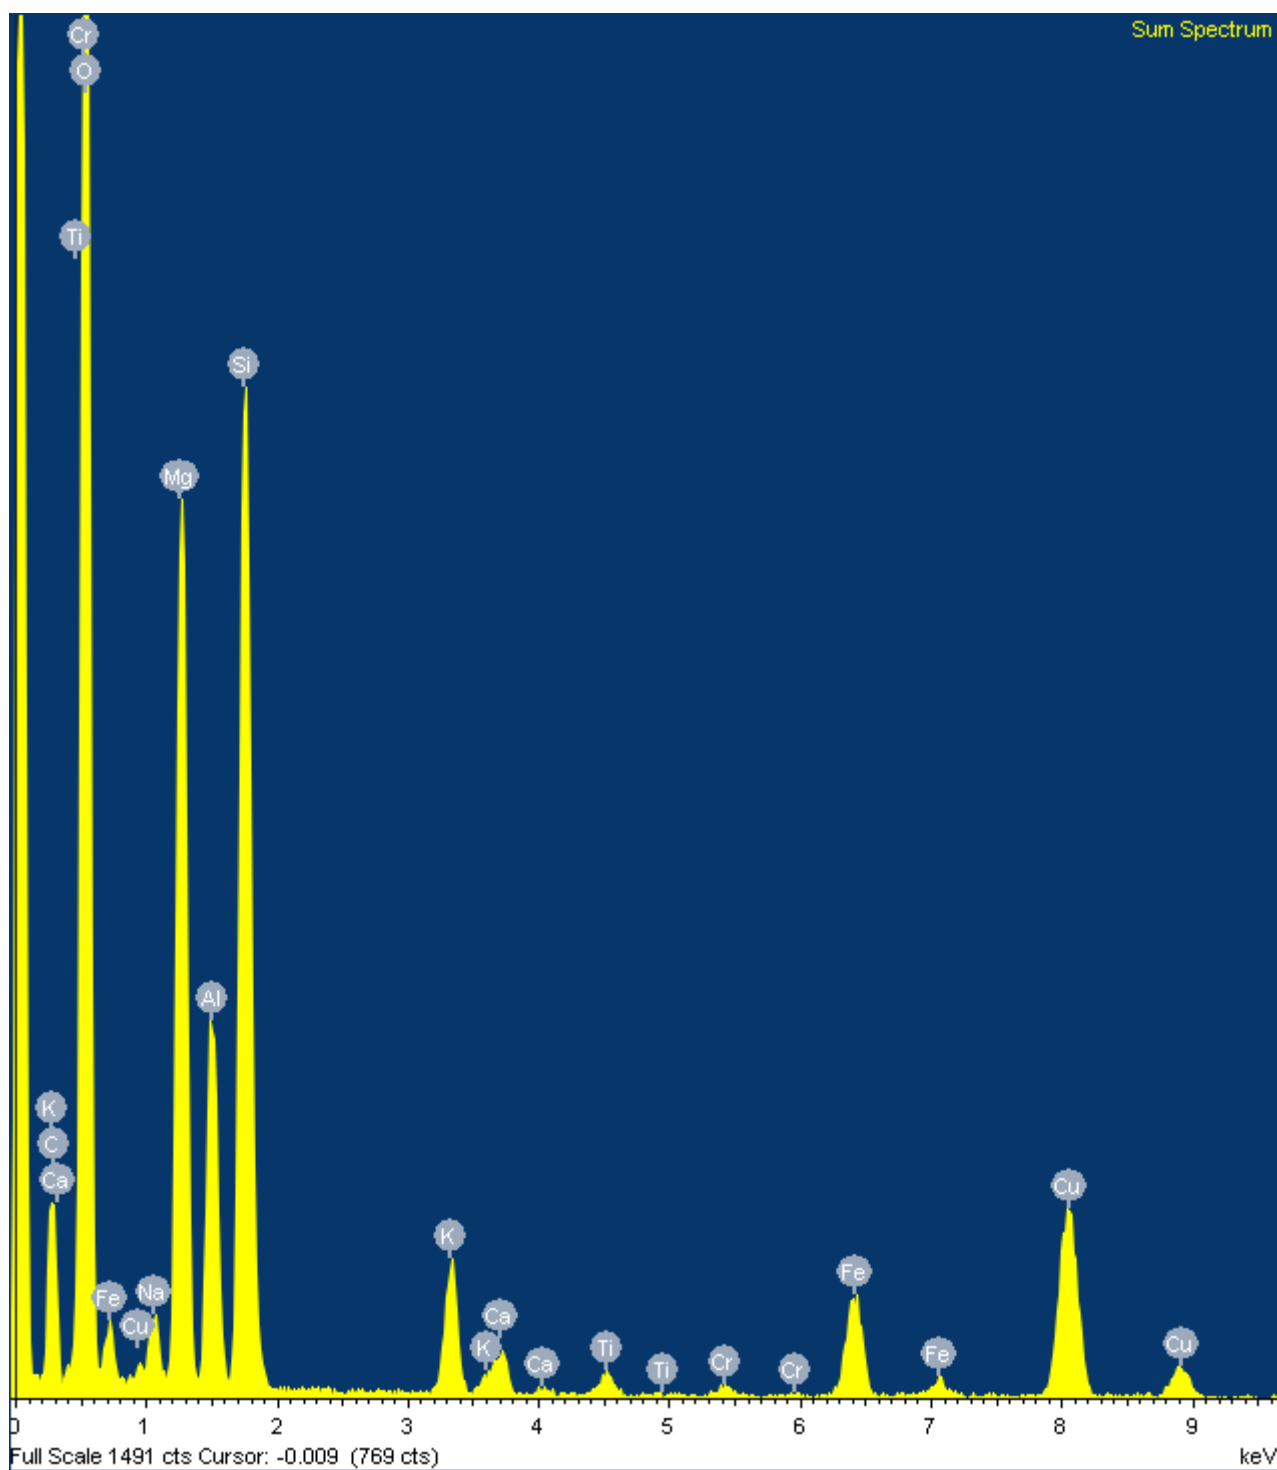

Comment:

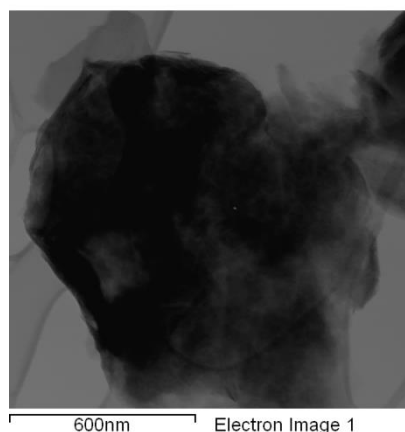

600nm

Electron Image 1

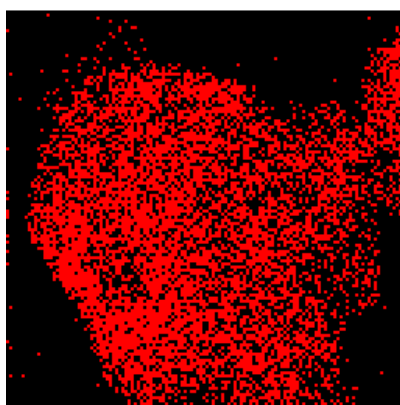

600nm

O Ka1

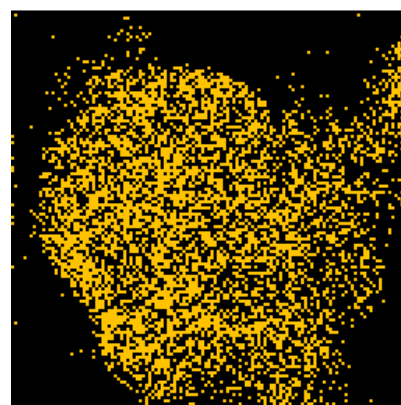

600nm

Mg Ka1\_2

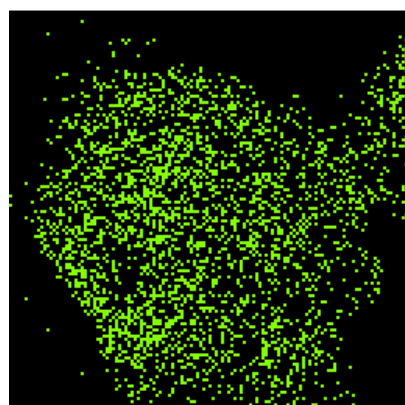

600nm

Al Ka1

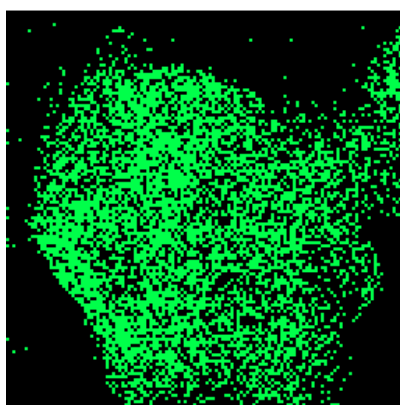

600nm

Si Ka1

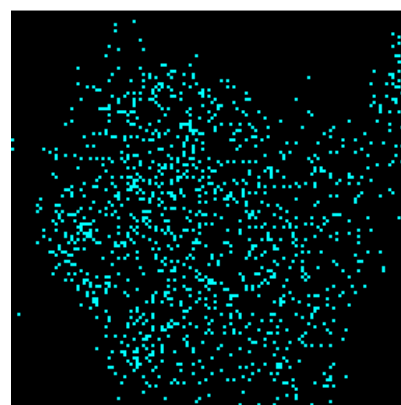

600nm

K Ka1

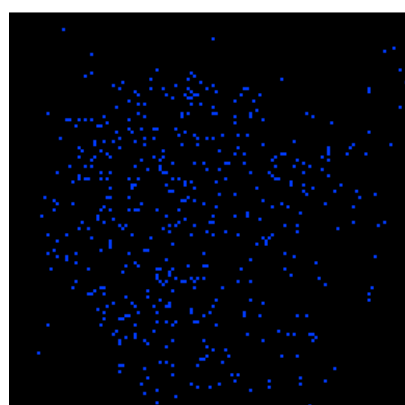

600nm

Ca Ka1

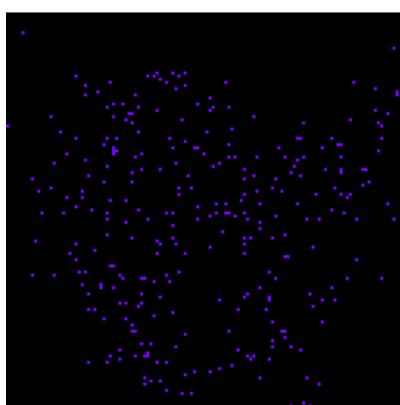

600nm

Ti Ka1

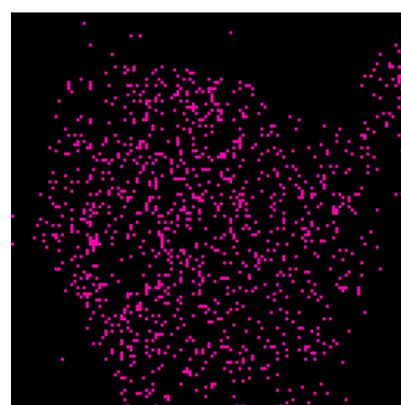

600nm

Fe Ka1

Comment:

Project: Project 1

Owner: INCA

Sample: CHG-4B-MW-Ex

Type: Default

| Element | Peak  | Area  | k      | Abs   | Weight% | Weight% | Atomic% |
|---------|-------|-------|--------|-------|---------|---------|---------|
|         | Area  | Sigma | factor | Corn. |         | Sigma   |         |
| O K     | 25621 | 293   | 1.065  | 1.000 | 47.66   | 0.35    | 61.75   |
| Mg K    | 15890 | 222   | 0.606  | 1.000 | 16.81   | 0.22    | 14.33   |
| Al K    | 6739  | 164   | 0.589  | 1.000 | 6.94    | 0.16    | 5.33    |
| Si K    | 19929 | 252   | 0.569  | 1.000 | 19.81   | 0.24    | 14.62   |
| K K     | 3430  | 108   | 0.552  | 1.000 | 3.31    | 0.10    | 1.75    |
| Ca K    | 1059  | 73    | 0.542  | 1.000 | 1.00    | 0.07    | 0.52    |
| Ti K    | 603   | 55    | 0.608  | 1.000 | 0.64    | 0.06    | 0.28    |
| Fe K    | 3239  | 100   | 0.678  | 1.000 | 3.83    | 0.12    | 1.42    |
| Totals  |       |       |        |       | 100.00  |         |         |

Project: Project 1

Owner: INCA

Sample: CHG-4B-MW-Ex

Type: Default

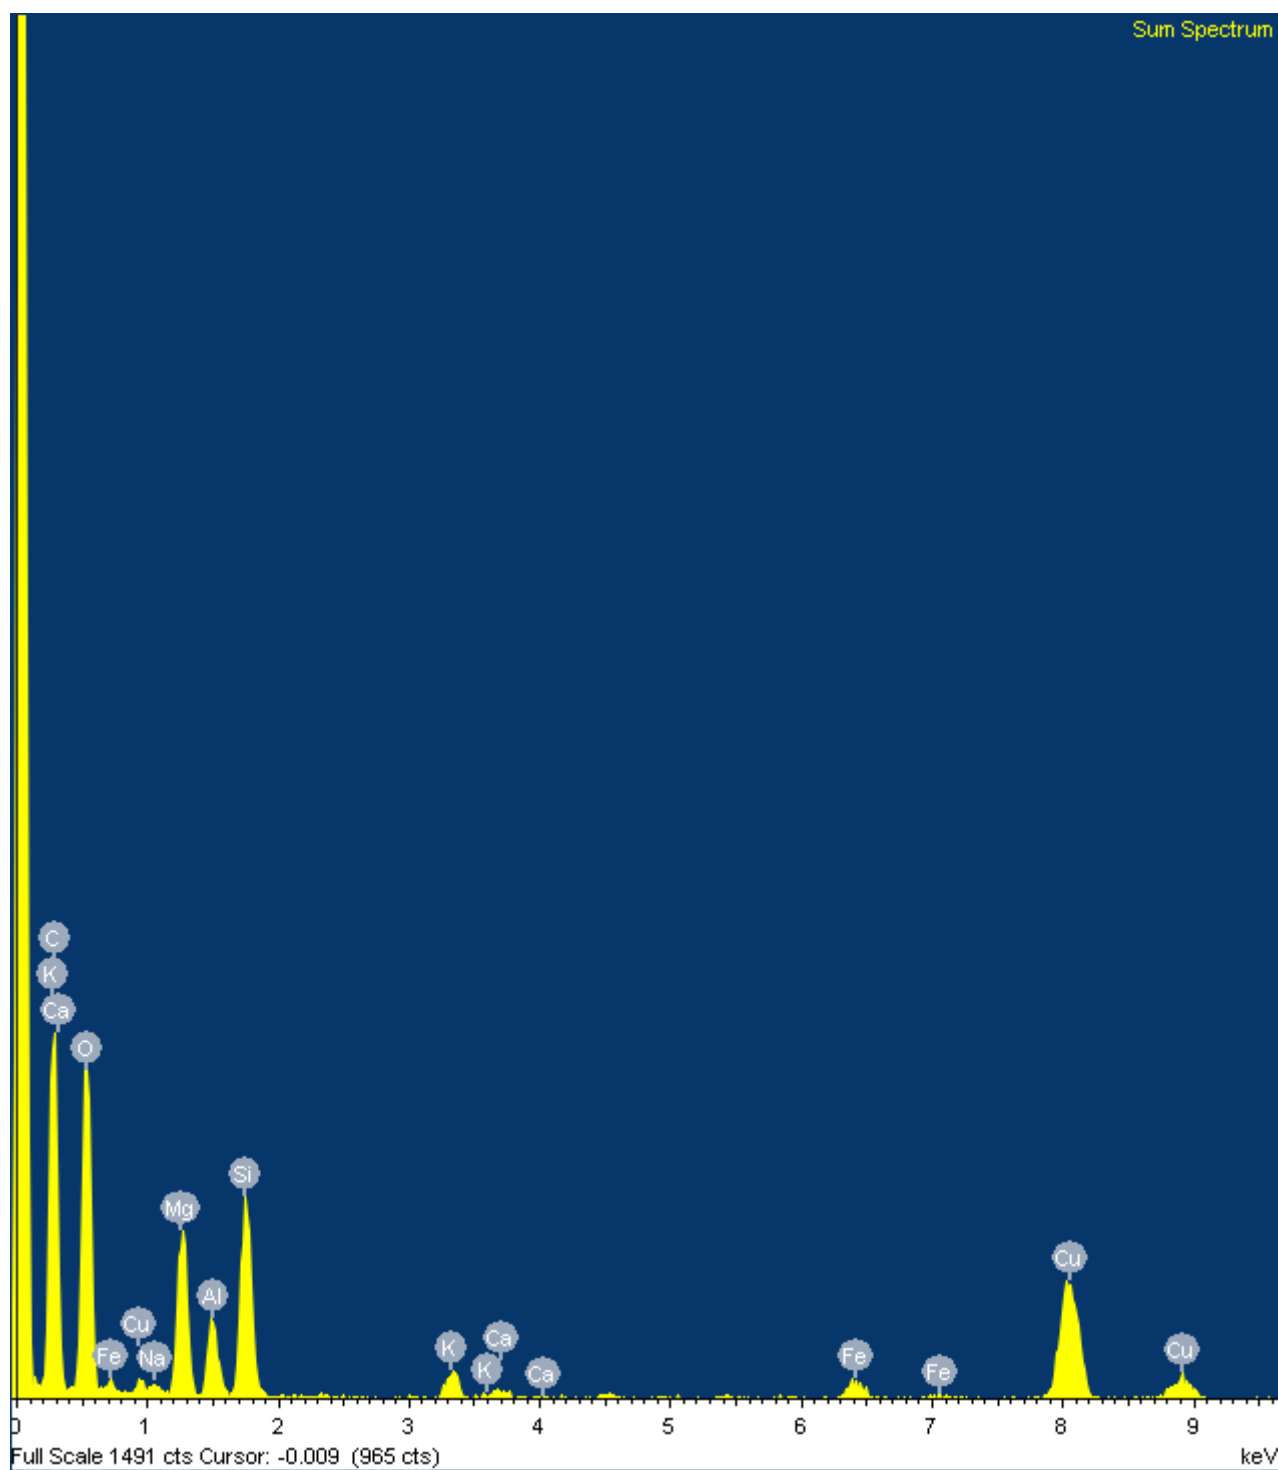

Comment:



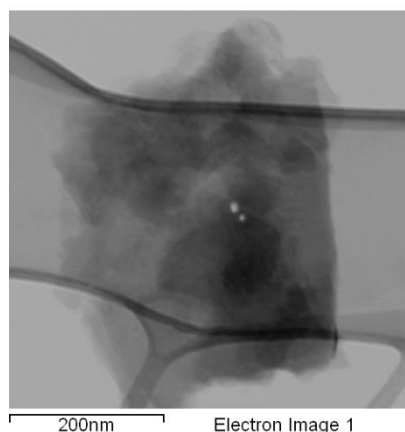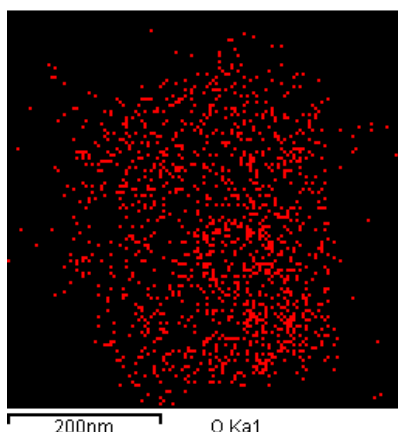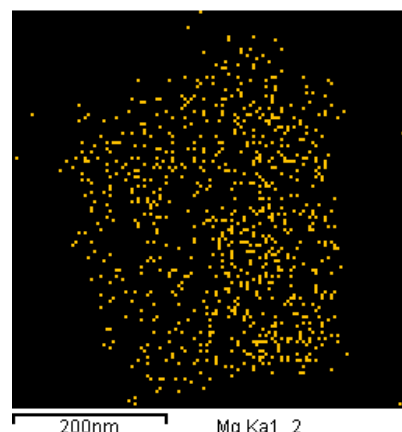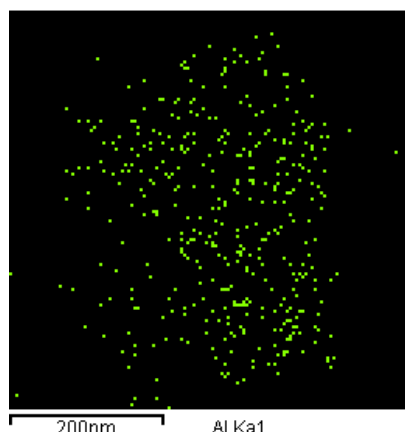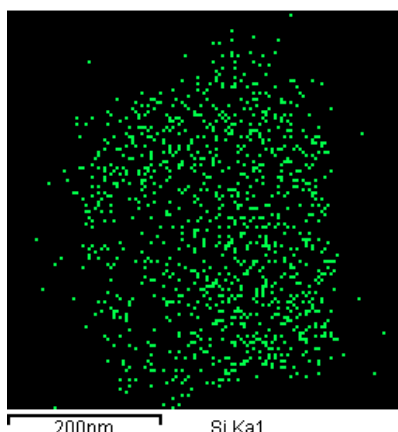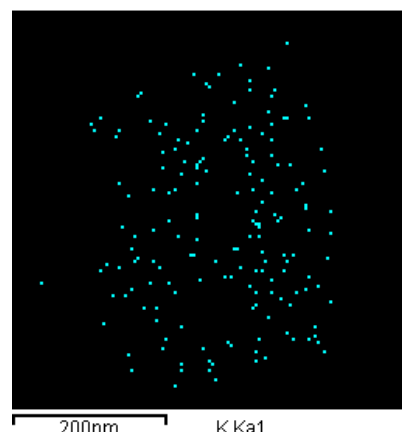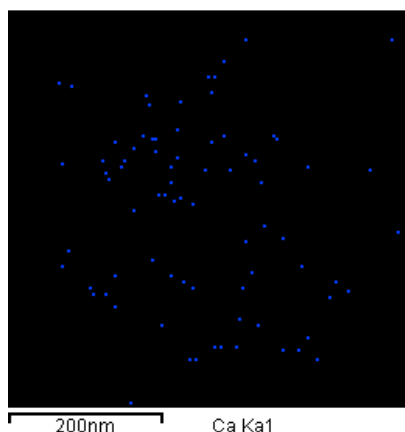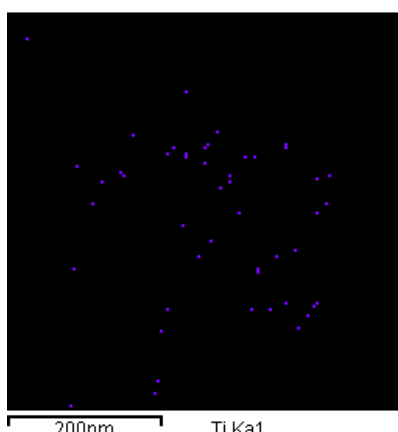

Comment:

Project: Project 1

Owner: INCA

Sample: CHG-4B-MW-Ex

Type: Default

| Element | Peak | Area  | k      | Abs    | Weight% | Weight% | Atomic% |
|---------|------|-------|--------|--------|---------|---------|---------|
|         | Area | Sigma | factor | Corrn. |         | Sigma   |         |
| O K     | 5715 | 140   | 1.065  | 1.000  | 51.83   | 0.77    | 65.47   |
| Mg K    | 3034 | 97    | 0.606  | 1.000  | 15.65   | 0.48    | 13.01   |
| Al K    | 1276 | 73    | 0.589  | 1.000  | 6.40    | 0.36    | 4.80    |
| Si K    | 3831 | 111   | 0.569  | 1.000  | 18.57   | 0.51    | 13.36   |
| K K     | 658  | 48    | 0.552  | 1.000  | 3.09    | 0.22    | 1.60    |
| Ca K    | 185  | 34    | 0.542  | 1.000  | 0.85    | 0.16    | 0.43    |
| Ti K    | 114  | 27    | 0.608  | 1.000  | 0.59    | 0.14    | 0.25    |
| Fe K    | 523  | 44    | 0.678  | 1.000  | 3.02    | 0.25    | 1.09    |
| Totals  |      |       |        |        | 100.00  |         |         |
