# Supplementary material for: Heterogeneous Distribution of Interlayer Cations and Iron as a Plausible Explanation of the Non-Exfoliation of Commercial Vermiculites Post Alcohol Treatment and Microwave Irradiation
Source: MDPI journal article supplement (doi:10.3390/min11080835), 2021-08-01
Supplement: s1 [file s1]

LPN

Project: Project 1

Owner: INCA

Sample: L4P-MW-No

Type: Default

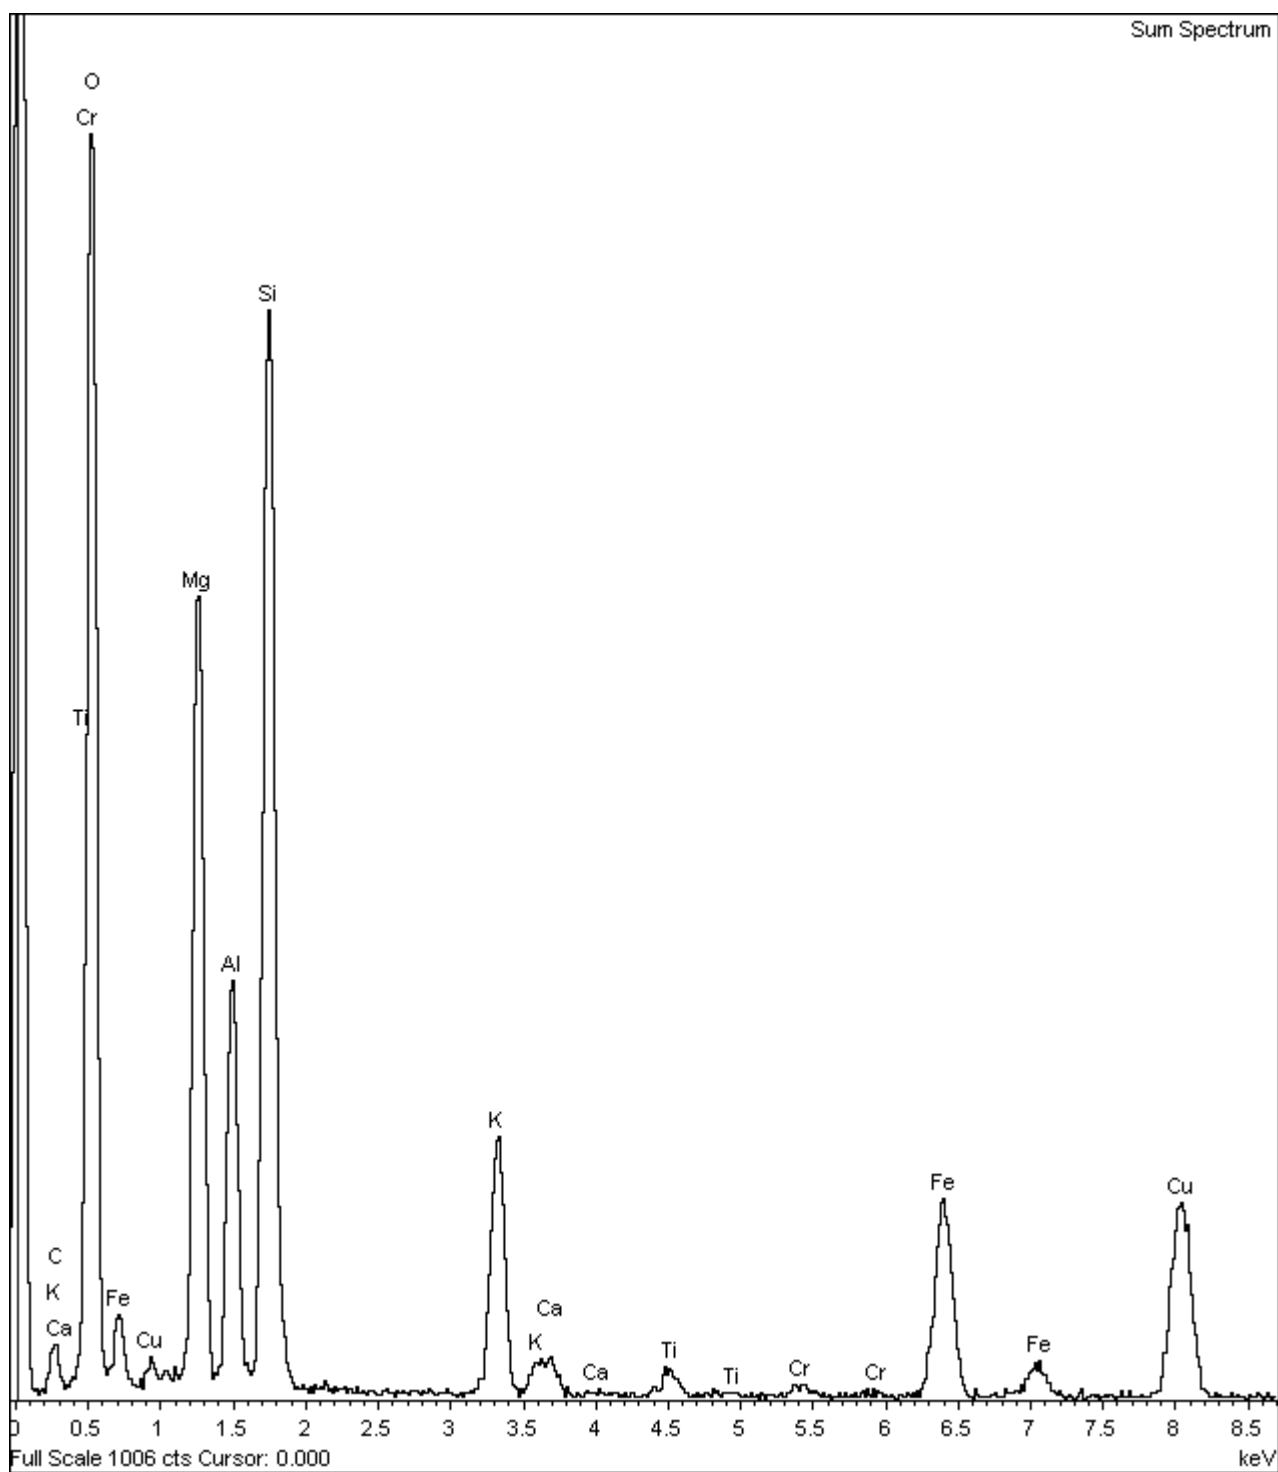

Comment:

| Element | Peak  | Area  | k      | Abs    | Weight% | Weight% | Atomic% |
|---------|-------|-------|--------|--------|---------|---------|---------|
|         | Area  | Sigma | factor | Corrn. |         | Sigma   |         |
| O K     | 13866 | 216   | 1.065  | 1.000  | 38.67   | 0.43    | 54.05   |
| Mg K    | 9818  | 177   | 0.606  | 1.000  | 15.57   | 0.27    | 14.32   |
| Al K    | 4998  | 141   | 0.589  | 1.000  | 7.72    | 0.21    | 6.39    |
| Si K    | 14694 | 215   | 0.569  | 1.000  | 21.90   | 0.30    | 17.44   |
| K K     | 4679  | 122   | 0.552  | 1.000  | 6.76    | 0.17    | 3.87    |
| Ca K    | 546   | 60    | 0.542  | 1.000  | 0.78    | 0.09    | 0.43    |
| Ti K    | 468   | 51    | 0.608  | 1.000  | 0.74    | 0.08    | 0.35    |
| Fe K    | 4425  | 114   | 0.678  | 1.000  | 7.86    | 0.20    | 3.15    |
| Totals  |       |       |        |        | 100.00  |         |         |

| Element | Peak | Area  | k      | Abs    | Weight% | Weight% | Atomic% |
|---------|------|-------|--------|--------|---------|---------|---------|
|         | Area | Sigma | factor | Corrn. |         | Sigma   |         |
| O K     | 4240 | 118   | 1.065  | 1.000  | 38.67   | 0.76    | 54.18   |
| Mg K    | 2977 | 95    | 0.606  | 1.000  | 15.44   | 0.47    | 14.24   |
| Al K    | 1498 | 76    | 0.589  | 1.000  | 7.56    | 0.37    | 6.28    |
| Si K    | 4409 | 117   | 0.569  | 1.000  | 21.49   | 0.53    | 17.15   |
| K K     | 1495 | 67    | 0.552  | 1.000  | 7.06    | 0.31    | 4.05    |
| Ca K    | 173  | 33    | 0.542  | 1.000  | 0.81    | 0.15    | 0.45    |
| Ti K    | 172  | 30    | 0.608  | 1.000  | 0.90    | 0.15    | 0.42    |
| Fe K    | 1391 | 63    | 0.678  | 1.000  | 8.07    | 0.35    | 3.24    |
| Totals  |      |       |        |        | 100.00  |         |         |

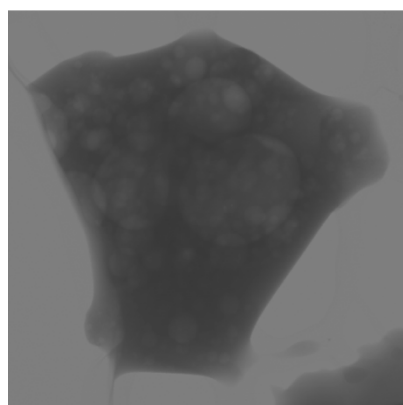

Electron Image 1

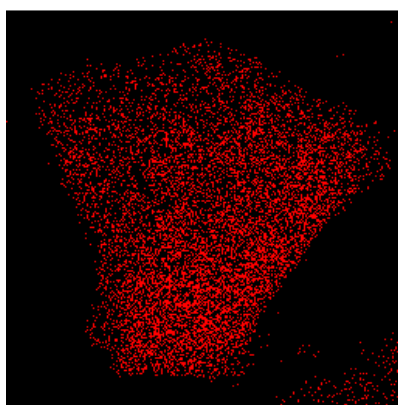

O Ka1

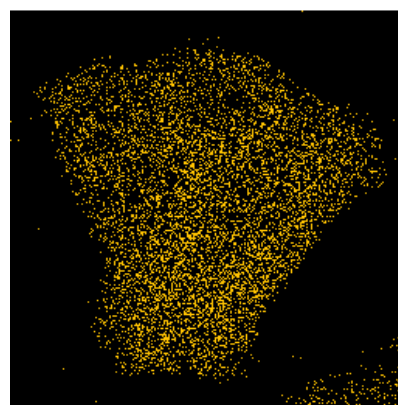

Mg Ka1\_2

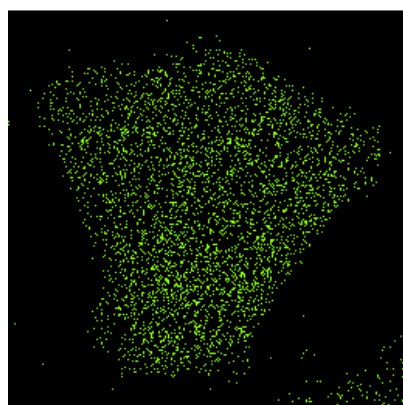

Al Ka1

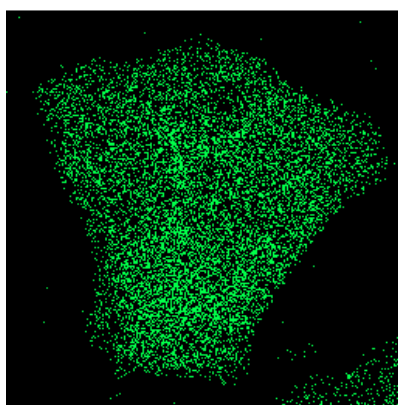

Si Ka1

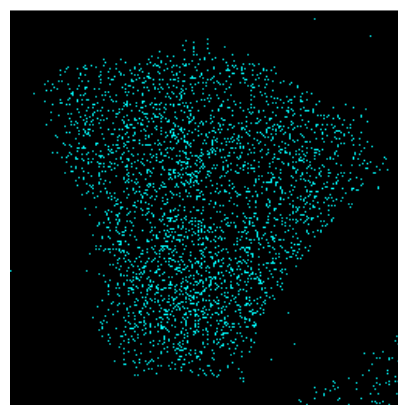

K Ka1

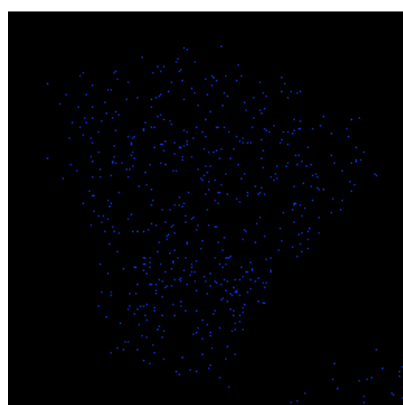

Ca Ka1

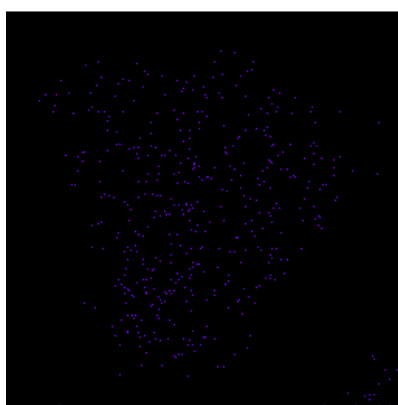

Ti Ka1

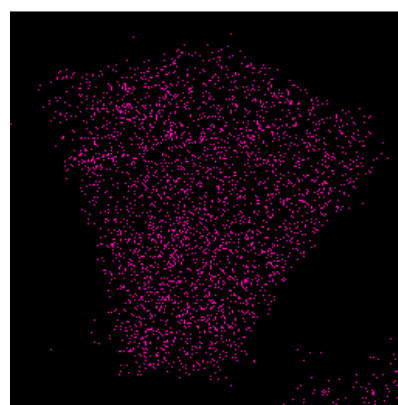

Fe Ka1

Comment:

Inca

Inca

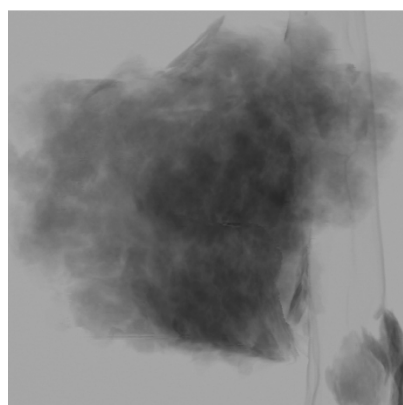

900nm Electron Image 1

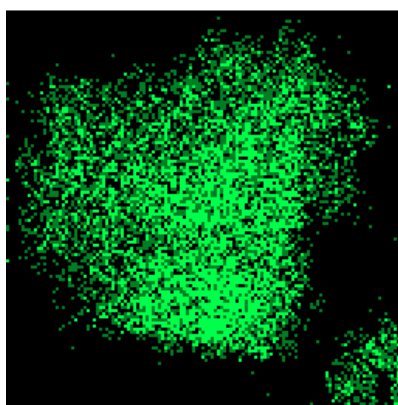

900nm O Ka1

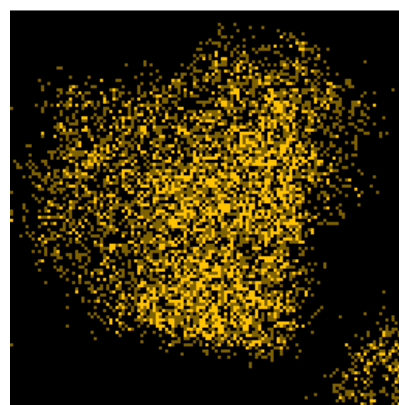

900nm Mg Ka1\_2

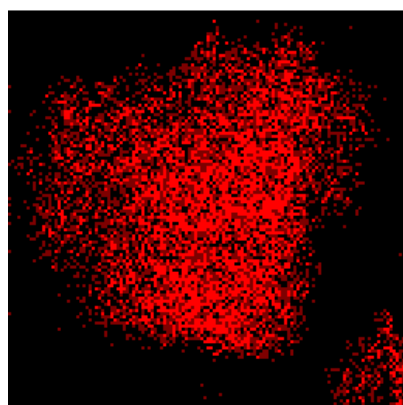

900nm Si Ka1

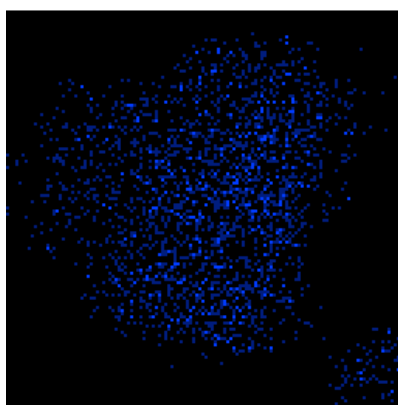

900nm K Ka1

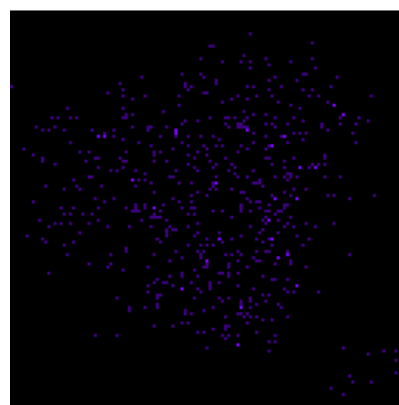

900nm Ca Ka1

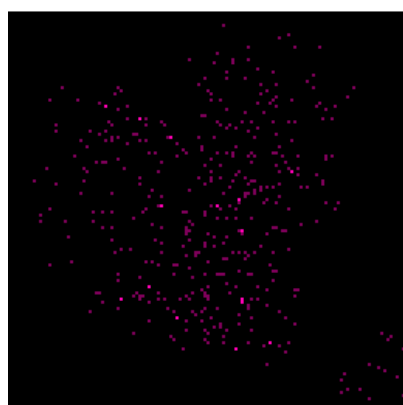

900nm Ti Ka1

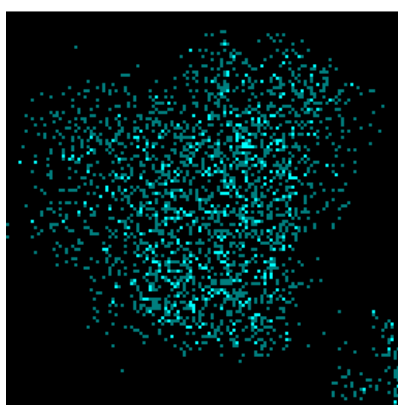

900nm Fe Ka1

Comment:

Project: Project 1

Owner: INCA

Sample: L4P-MW-No

Type: Default

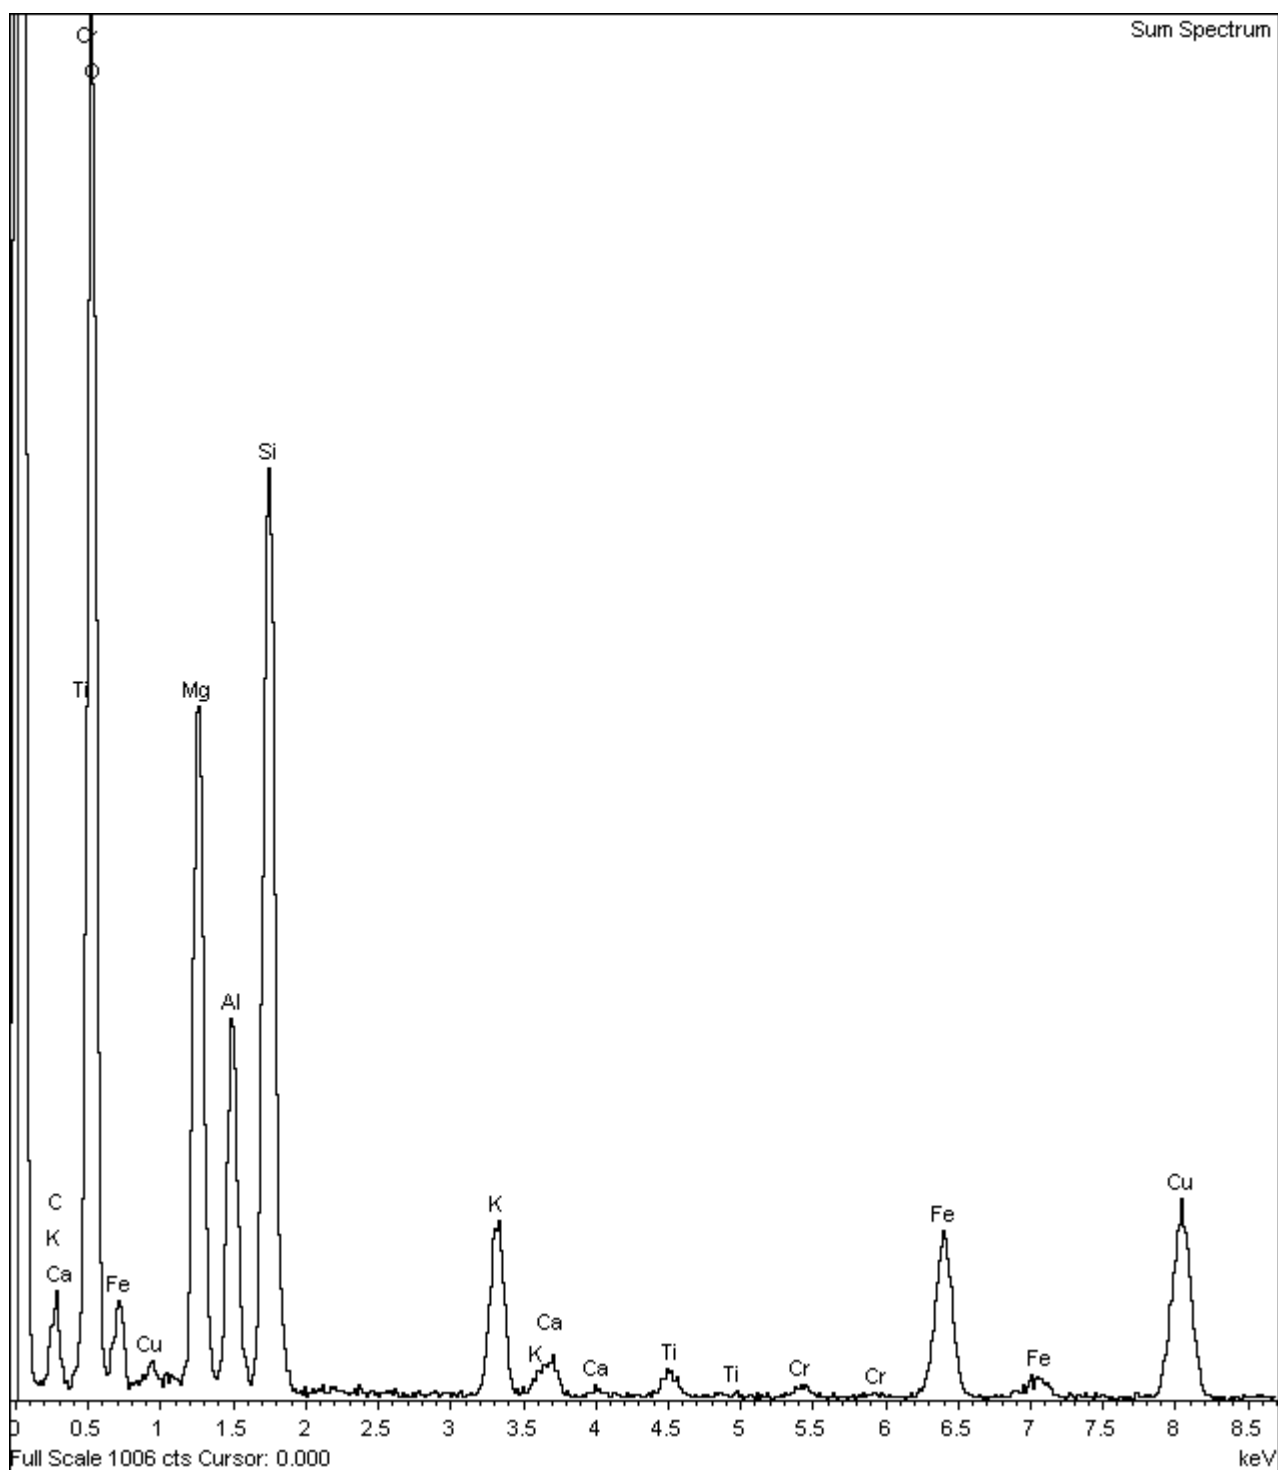

Comment:

| Element | Peak  | Area  | k      | Abs    | Weight% | Weight% | Atomic% |
|---------|-------|-------|--------|--------|---------|---------|---------|
|         | Area  | Sigma | factor | Corrn. |         | Sigma   |         |
| O K     | 14519 | 222   | 1.065  | 1.000  | 44.27   | 0.45    | 59.49   |
| Mg K    | 8357  | 163   | 0.606  | 1.000  | 14.49   | 0.27    | 12.82   |
| Al K    | 4357  | 130   | 0.589  | 1.000  | 7.35    | 0.21    | 5.86    |
| Si K    | 12526 | 199   | 0.569  | 1.000  | 20.41   | 0.31    | 15.63   |
| K K     | 3146  | 102   | 0.552  | 1.000  | 4.97    | 0.16    | 2.73    |
| Ca K    | 625   | 58    | 0.542  | 1.000  | 0.97    | 0.09    | 0.52    |
| Ti K    | 436   | 48    | 0.608  | 1.000  | 0.76    | 0.08    | 0.34    |
| Fe K    | 3495  | 103   | 0.678  | 1.000  | 6.78    | 0.19    | 2.61    |
| Totals  |       |       |        |        | 100.00  |         |         |

| Element | Peak  | Area  | k      | Abs    | Weight% | Weight% | Atomic% |
|---------|-------|-------|--------|--------|---------|---------|---------|
|         | Area  | Sigma | factor | Corrn. |         | Sigma   |         |
| O K     | 14519 | 222   | 1.065  | 1.000  | 44.27   | 0.45    | 59.49   |
| Mg K    | 8357  | 163   | 0.606  | 1.000  | 14.49   | 0.27    | 12.82   |
| Al K    | 4357  | 130   | 0.589  | 1.000  | 7.35    | 0.21    | 5.86    |
| Si K    | 12526 | 199   | 0.569  | 1.000  | 20.41   | 0.31    | 15.63   |
| K K     | 3146  | 102   | 0.552  | 1.000  | 4.97    | 0.16    | 2.73    |
| Ca K    | 625   | 58    | 0.542  | 1.000  | 0.97    | 0.09    | 0.52    |
| Ti K    | 436   | 48    | 0.608  | 1.000  | 0.76    | 0.08    | 0.34    |
| Fe K    | 3495  | 103   | 0.678  | 1.000  | 6.78    | 0.19    | 2.61    |
| Totals  |       |       |        |        | 100.00  |         |         |

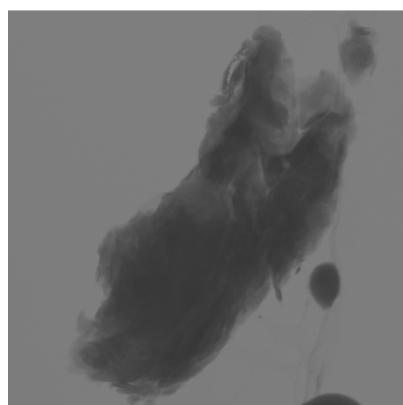

2µm Electron Image 1

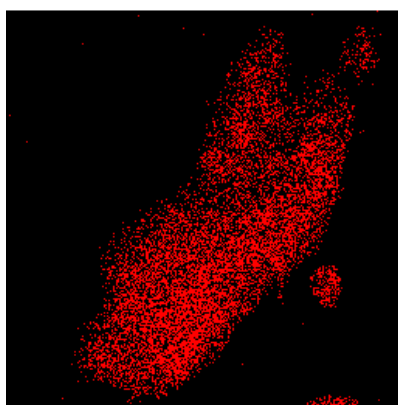

2µm Si Ka1

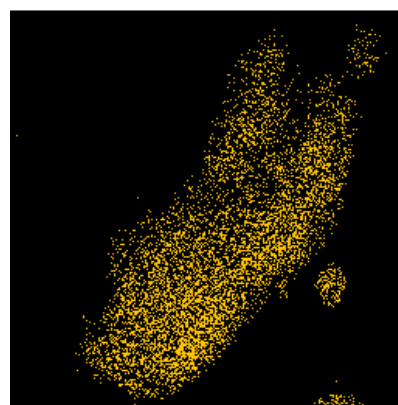

2µm Mg Ka1\_2

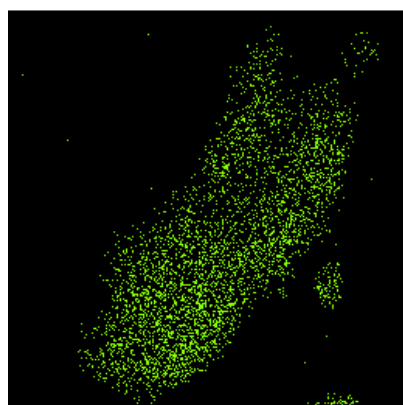

2µm Al Ka1

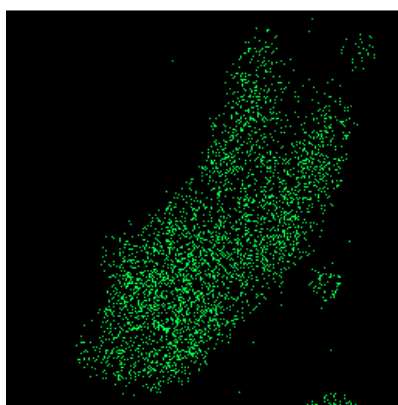

2µm Fe Ka1

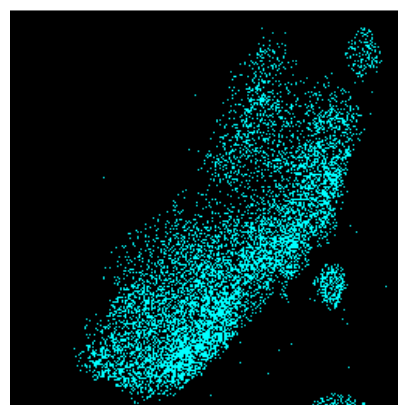

2µm O Ka1

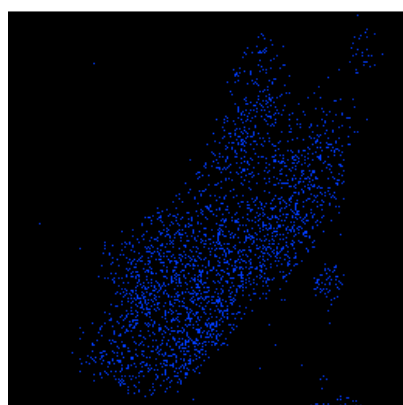

2µm K Ka1

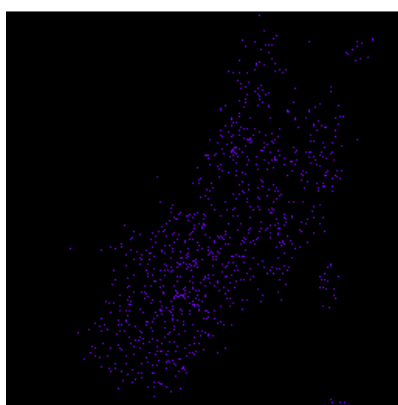

2µm Ca Ka1

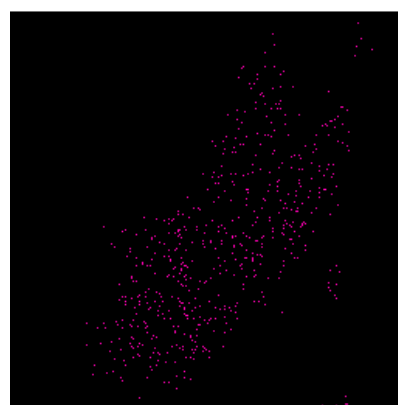

2µm Ti Ka1

Comment:

Inca

Inca



Project: Project 1

Owner: INCA

Sample: L4P-MW-No

Type: Default

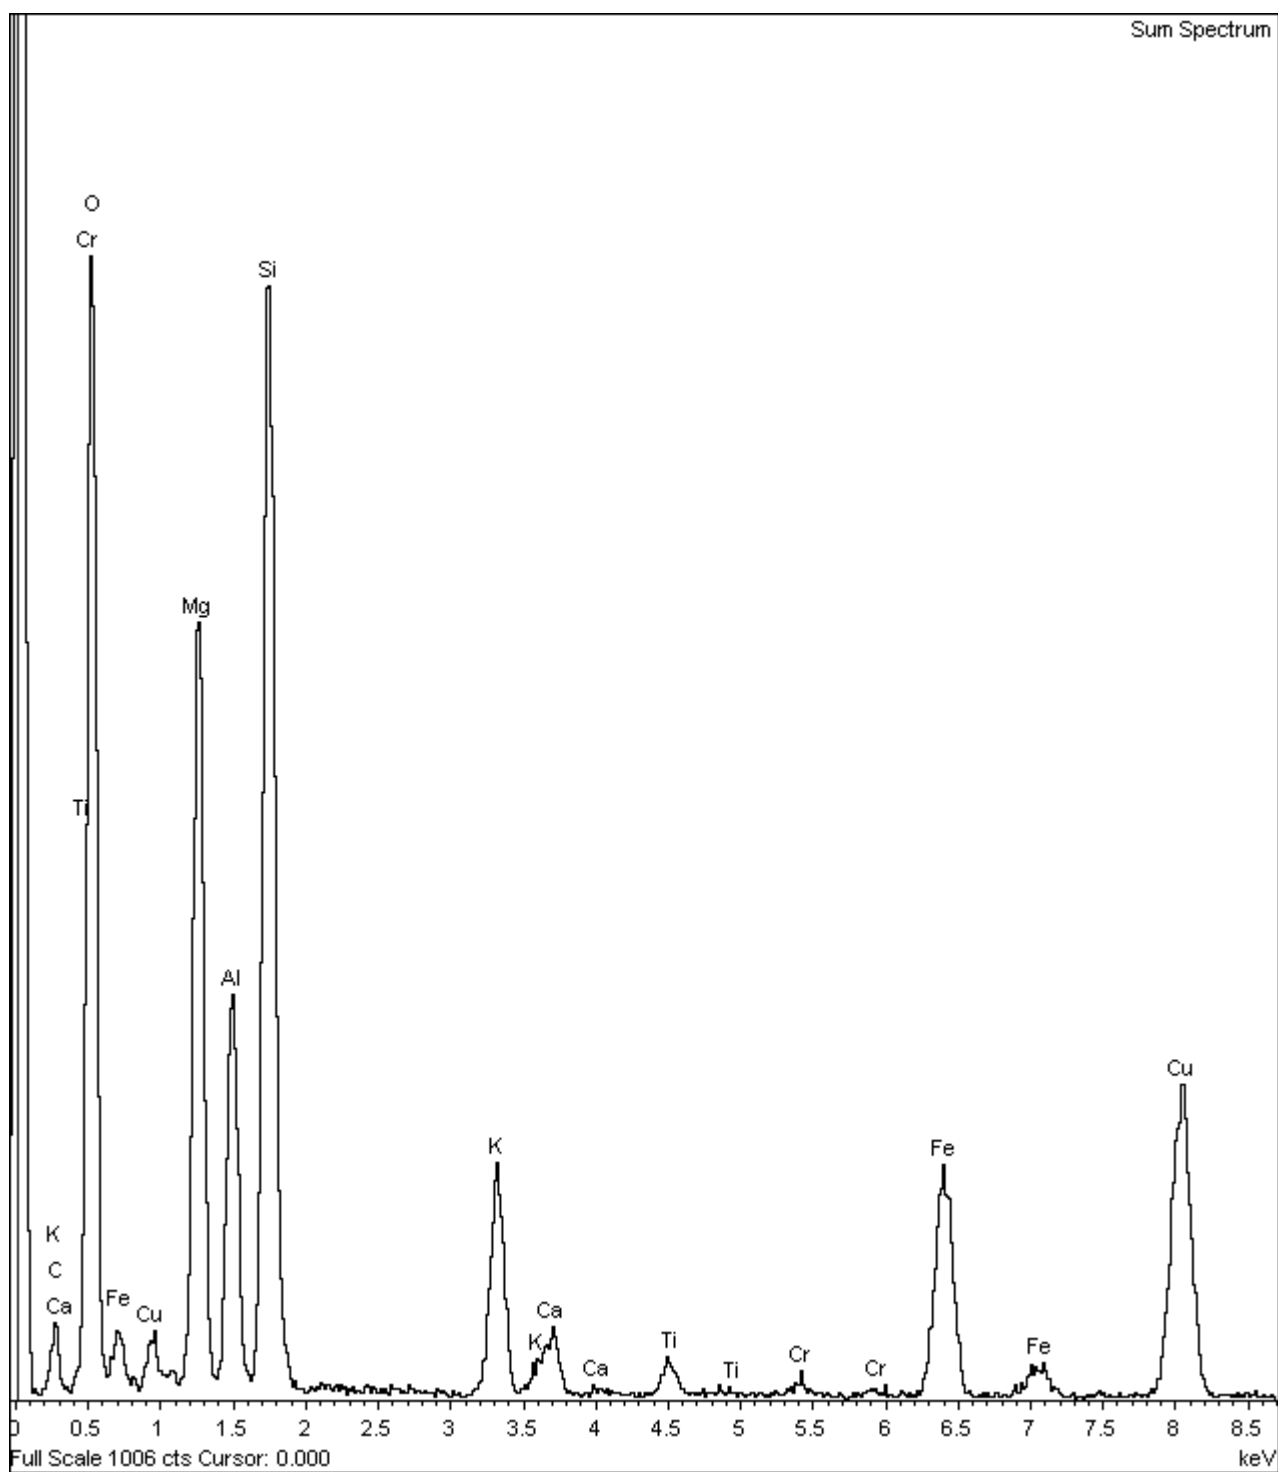

Comment:

| Element | Peak  | Area  | k      | Abs    | Weight% | Weight% | Atomic% |
|---------|-------|-------|--------|--------|---------|---------|---------|
|         | Area  | Sigma | factor | Corrn. |         | Sigma   |         |
| O K     | 12142 | 201   | 1.065  | 1.000  | 35.47   | 0.43    | 50.92   |
| Mg K    | 9290  | 171   | 0.606  | 1.000  | 15.44   | 0.27    | 14.58   |
| Al K    | 4876  | 138   | 0.589  | 1.000  | 7.89    | 0.22    | 6.71    |
| Si K    | 14971 | 216   | 0.569  | 1.000  | 23.37   | 0.31    | 19.11   |
| K K     | 3835  | 114   | 0.552  | 1.000  | 5.81    | 0.17    | 3.41    |
| Ca K    | 1003  | 72    | 0.542  | 1.000  | 1.49    | 0.11    | 0.86    |
| Ti K    | 622   | 56    | 0.608  | 1.000  | 1.04    | 0.09    | 0.50    |
| Fe K    | 5108  | 123   | 0.678  | 1.000  | 9.50    | 0.22    | 3.91    |
| Totals  |       |       |        |        | 100.00  |         |         |

| Element | Peak | Area  | k      | Abs    | Weight% | Weight% | Atomic% |
|---------|------|-------|--------|--------|---------|---------|---------|
|         | Area | Sigma | factor | Corrn. |         | Sigma   |         |
| C K     | 68   | 64    | 1.425  | 1.000  | 1.28    | 1.18    | 2.41    |
| O K     | 2533 | 91    | 1.065  | 1.000  | 35.71   | 1.03    | 50.55   |
| Mg K    | 1840 | 76    | 0.606  | 1.000  | 14.76   | 0.60    | 13.75   |
| Al K    | 900  | 61    | 0.589  | 1.000  | 7.02    | 0.47    | 5.89    |
| Si K    | 3075 | 97    | 0.569  | 1.000  | 23.17   | 0.73    | 18.69   |
| K K     | 811  | 51    | 0.552  | 1.000  | 5.93    | 0.37    | 3.43    |
| Ca K    | 246  | 33    | 0.542  | 1.000  | 1.77    | 0.23    | 1.00    |
| Ti K    | 131  | 25    | 0.608  | 1.000  | 1.06    | 0.20    | 0.50    |
| Fe K    | 1037 | 53    | 0.678  | 1.000  | 9.31    | 0.47    | 3.78    |
| Totals  |      |       |        |        | 100.00  |         |         |

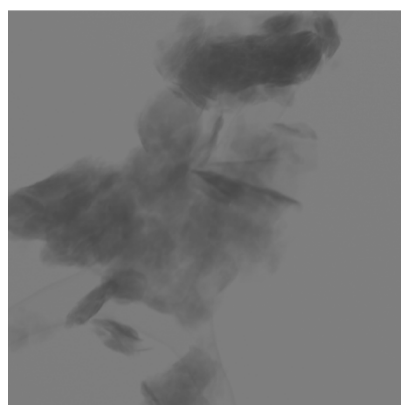

Electron Image 1

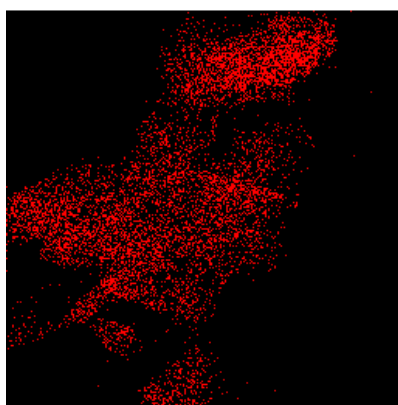

O Ka1

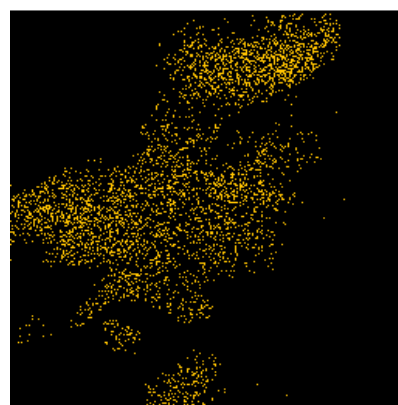

Mg Ka1\_2

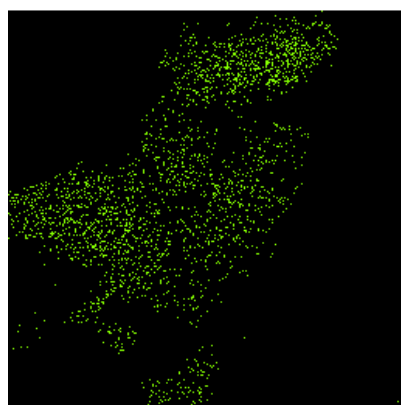

Al Ka1

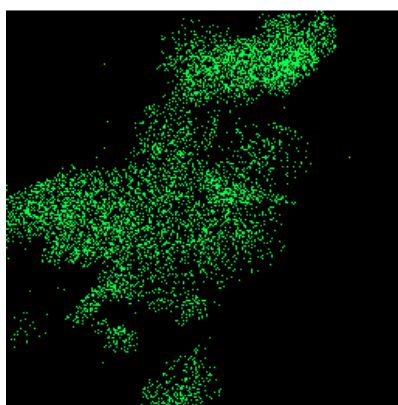

Si Ka1

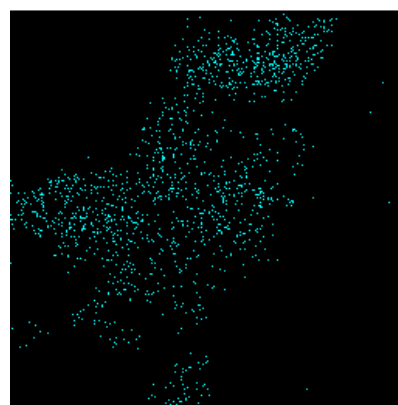

K Ka1

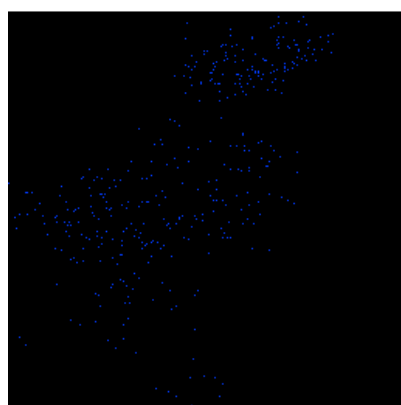

Ca Ka1

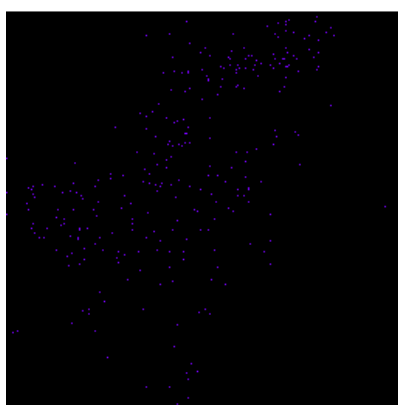

Ti Ka1

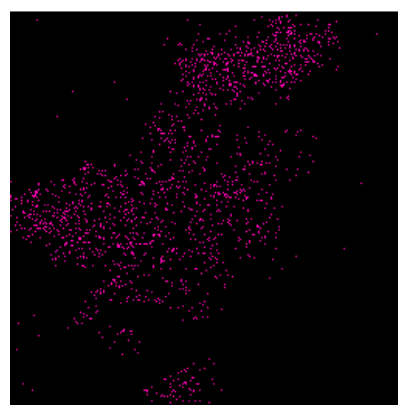

Fe Ka1

Comment:

**Inca**

**Inca**

Project: Project 1

Owner: INCA

Sample: L4P-MW-No

Type: Default

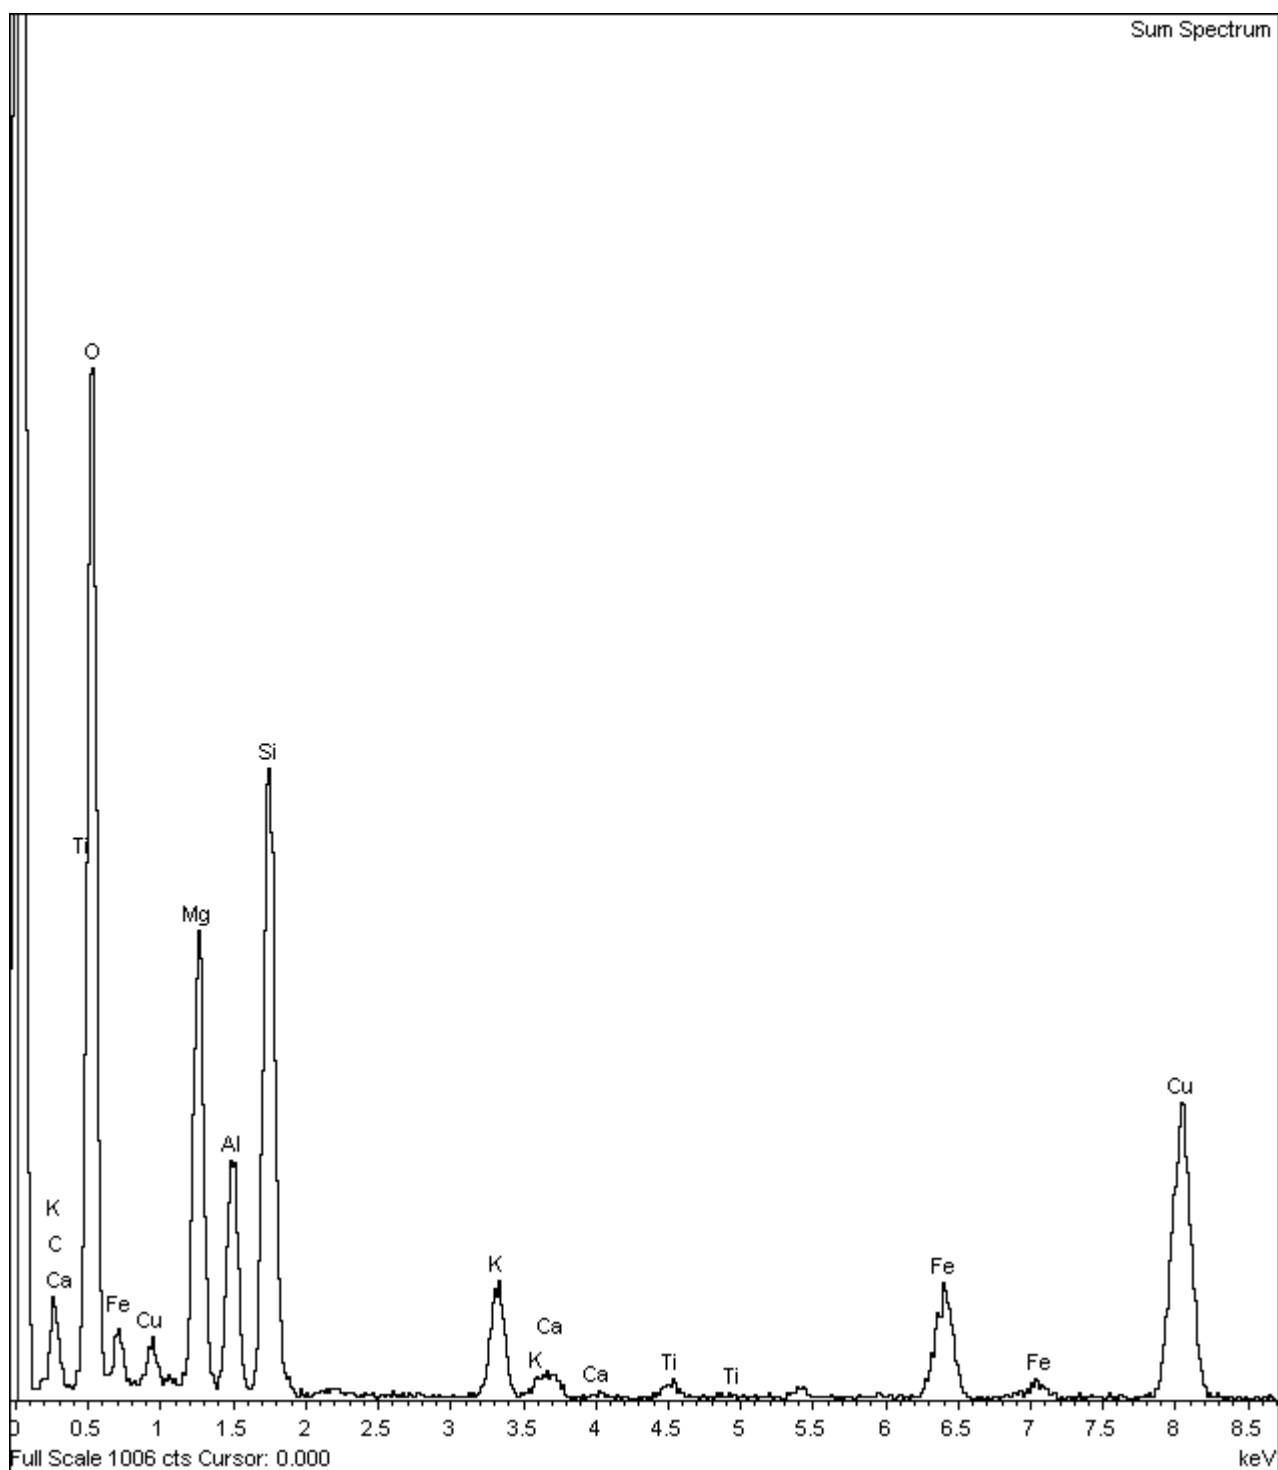

Comment:

| Element | Peak  | Area  | k      | Abs    | Weight% | Weight% | Atomic% |
|---------|-------|-------|--------|--------|---------|---------|---------|
|         | Area  | Sigma | factor | Corrn. |         | Sigma   |         |
| O K     | 10913 | 194   | 1.065  | 1.000  | 47.15   | 0.54    | 62.30   |
| Mg K    | 5500  | 134   | 0.606  | 1.000  | 13.51   | 0.32    | 11.75   |
| Al K    | 2921  | 107   | 0.589  | 1.000  | 6.98    | 0.25    | 5.47    |
| Si K    | 8463  | 164   | 0.569  | 1.000  | 19.54   | 0.36    | 14.71   |
| K K     | 2049  | 84    | 0.552  | 1.000  | 4.59    | 0.19    | 2.48    |
| Ca K    | 398   | 49    | 0.542  | 1.000  | 0.88    | 0.11    | 0.46    |
| Ti K    | 305   | 39    | 0.608  | 1.000  | 0.75    | 0.10    | 0.33    |
| Fe K    | 2400  | 87    | 0.678  | 1.000  | 6.60    | 0.23    | 2.50    |
| Totals  |       |       |        |        | 100.00  |         |         |

| Element | Peak  | Area  | k      | Abs    | Weight% | Weight% | Atomic% |
|---------|-------|-------|--------|--------|---------|---------|---------|
|         | Area  | Sigma | factor | Corrn. |         | Sigma   |         |
| O K     | 10913 | 194   | 1.065  | 1.000  | 47.15   | 0.54    | 62.30   |
| Mg K    | 5500  | 134   | 0.606  | 1.000  | 13.51   | 0.32    | 11.75   |
| Al K    | 2921  | 107   | 0.589  | 1.000  | 6.98    | 0.25    | 5.47    |
| Si K    | 8463  | 164   | 0.569  | 1.000  | 19.54   | 0.36    | 14.71   |
| K K     | 2049  | 84    | 0.552  | 1.000  | 4.59    | 0.19    | 2.48    |
| Ca K    | 398   | 49    | 0.542  | 1.000  | 0.88    | 0.11    | 0.46    |
| Ti K    | 305   | 39    | 0.608  | 1.000  | 0.75    | 0.10    | 0.33    |
| Fe K    | 2400  | 87    | 0.678  | 1.000  | 6.60    | 0.23    | 2.50    |
| Totals  |       |       |        |        | 100.00  |         |         |

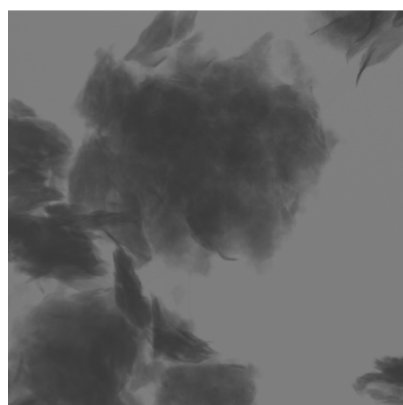

3µm Electron Image 1

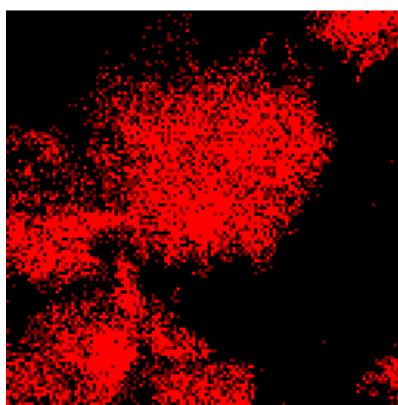

3µm O Ka1

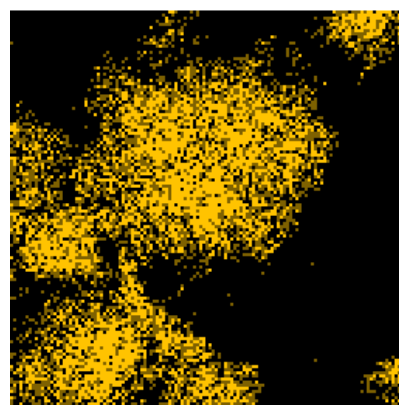

3µm Mg Ka1\_2

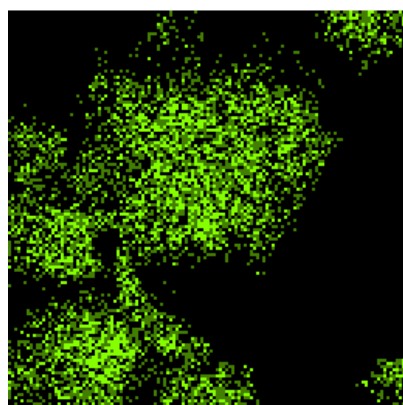

3µm Al Ka1

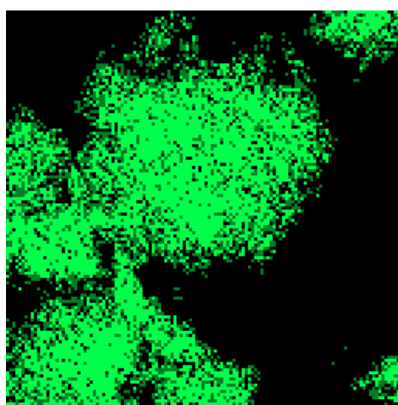

3µm Si Ka1

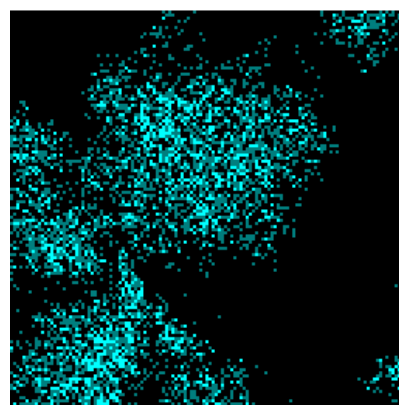

3µm K Ka1

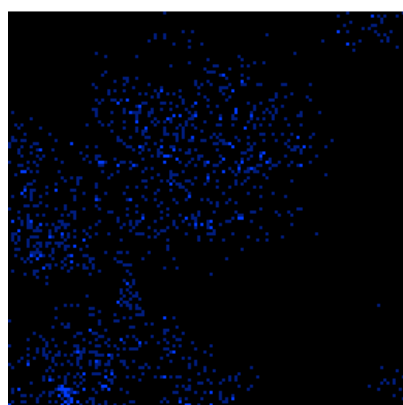

3µm Ca Ka1

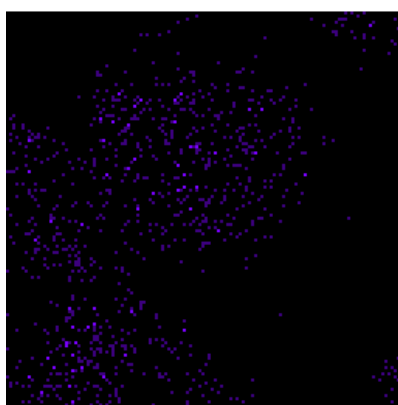

3µm Ti Ka1

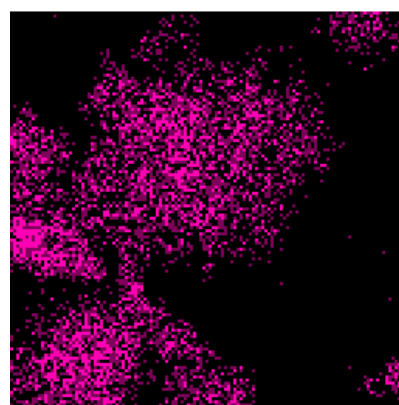

3µm Fe Ka1

Comment:

Project: Project 1

Owner: INCA

Sample: L4P-MW-No

Type: Default

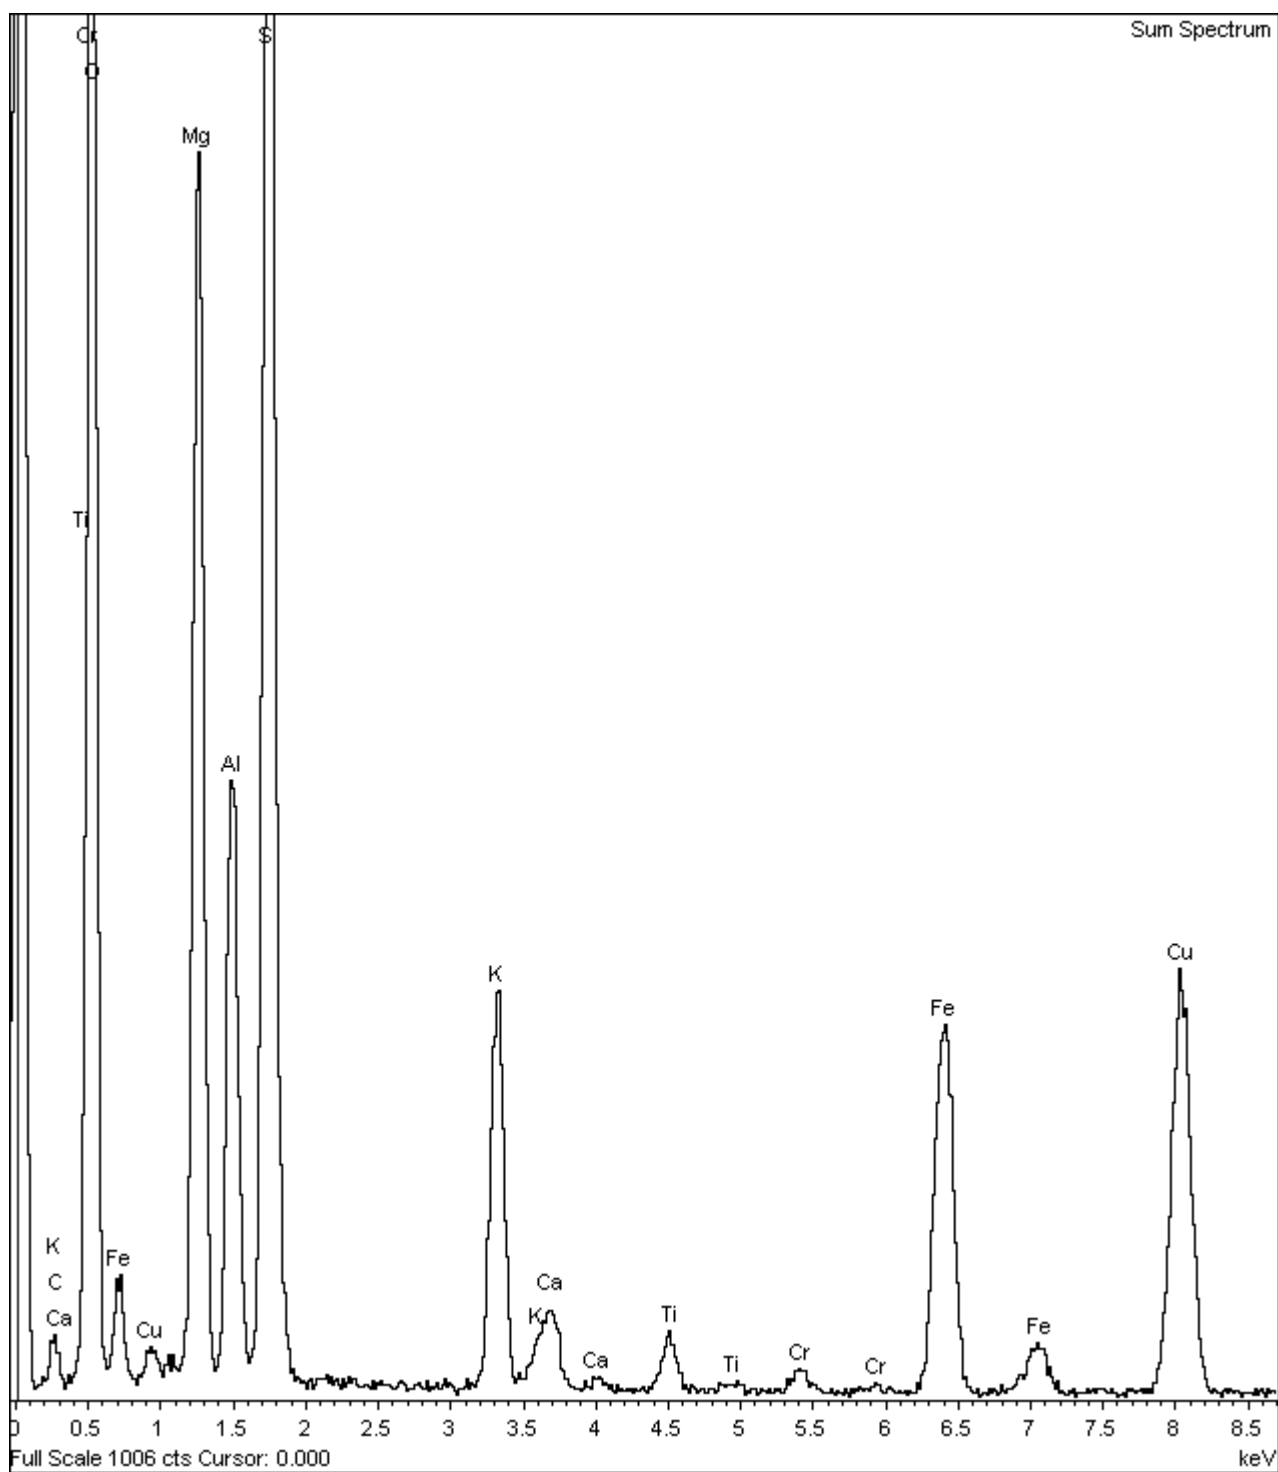

Comment:

| Element | Peak  | Area  | k      | Abs    | Weight% | Weight% | Atomic% |
|---------|-------|-------|--------|--------|---------|---------|---------|
|         | Area  | Sigma | factor | Corrn. |         | Sigma   |         |
| O K     | 18445 | 248   | 1.065  | 1.000  | 34.00   | 0.34    | 49.53   |
| Mg K    | 14653 | 216   | 0.606  | 1.000  | 15.36   | 0.21    | 14.73   |
| Al K    | 7580  | 174   | 0.589  | 1.000  | 7.73    | 0.17    | 6.68    |
| Si K    | 23765 | 276   | 0.569  | 1.000  | 23.41   | 0.25    | 19.43   |
| K K     | 7100  | 153   | 0.552  | 1.000  | 6.78    | 0.14    | 4.04    |
| Ca K    | 1478  | 90    | 0.542  | 1.000  | 1.39    | 0.08    | 0.81    |
| Ti K    | 964   | 71    | 0.608  | 1.000  | 1.01    | 0.07    | 0.49    |
| Fe K    | 8777  | 162   | 0.678  | 1.000  | 10.30   | 0.18    | 4.30    |
| Totals  |       |       |        |        | 100.00  |         |         |

| Element | Peak  | Area  | k      | Abs    | Weight% | Weight% | Atomic% |
|---------|-------|-------|--------|--------|---------|---------|---------|
|         | Area  | Sigma | factor | Corrn. |         | Sigma   |         |
| O K     | 18445 | 248   | 1.065  | 1.000  | 34.00   | 0.34    | 49.53   |
| Mg K    | 14653 | 216   | 0.606  | 1.000  | 15.36   | 0.21    | 14.73   |
| Al K    | 7580  | 174   | 0.589  | 1.000  | 7.73    | 0.17    | 6.68    |
| Si K    | 23765 | 276   | 0.569  | 1.000  | 23.41   | 0.25    | 19.43   |
| K K     | 7100  | 153   | 0.552  | 1.000  | 6.78    | 0.14    | 4.04    |
| Ca K    | 1478  | 90    | 0.542  | 1.000  | 1.39    | 0.08    | 0.81    |
| Ti K    | 964   | 71    | 0.608  | 1.000  | 1.01    | 0.07    | 0.49    |
| Fe K    | 8777  | 162   | 0.678  | 1.000  | 10.30   | 0.18    | 4.30    |
| Totals  |       |       |        |        | 100.00  |         |         |



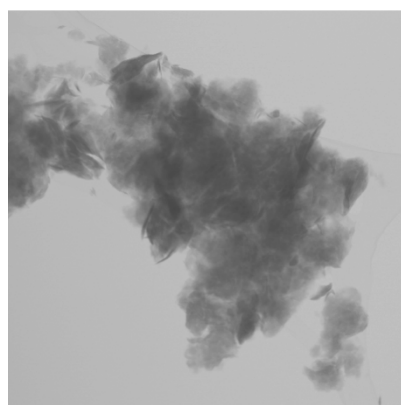

3µm Electron Image 1

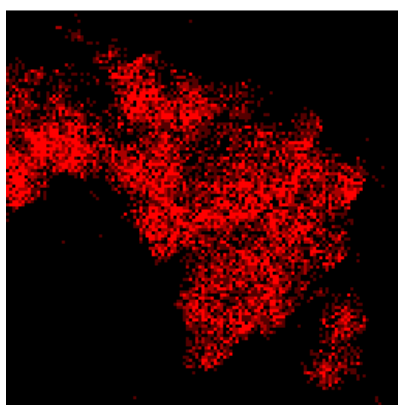

3µm O Ka1

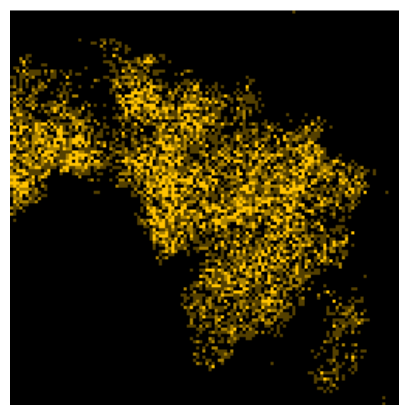

3µm Mg Ka1\_2

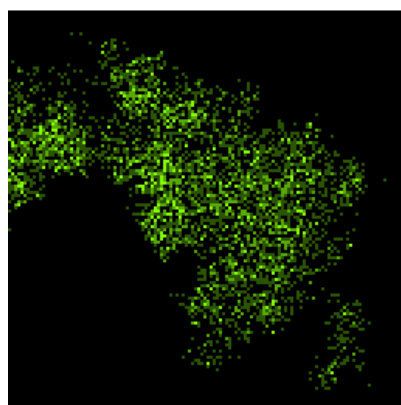

3µm Al Ka1

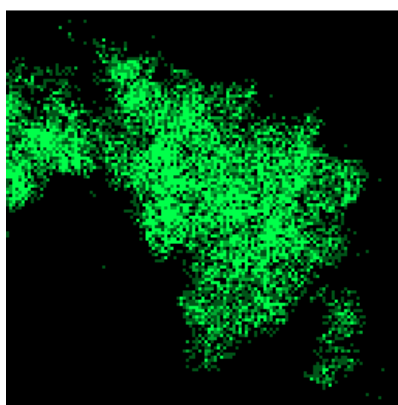

3µm Si Ka1

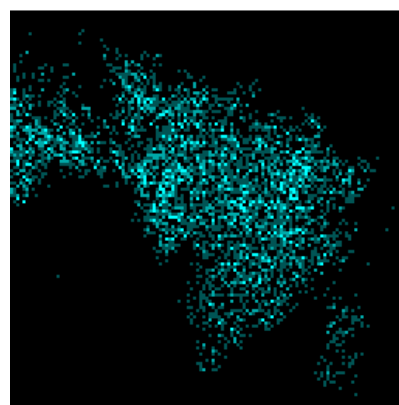

3µm K Ka1

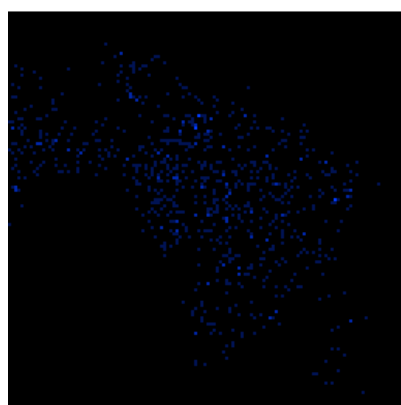

3µm Ca Ka1

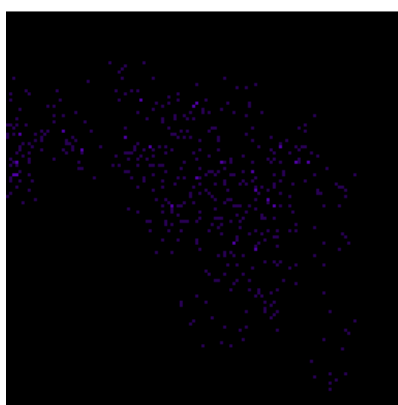

3µm Ti Ka1

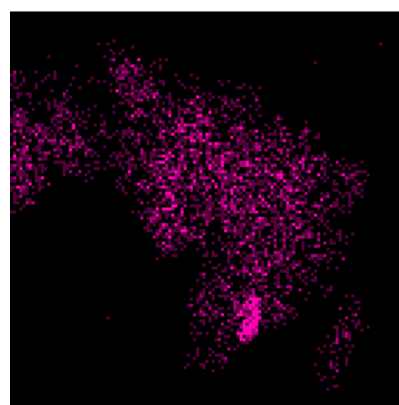

3µm Fe Ka1

Comment:

Project: Project 1

Owner: INCA

Sample: L4P-MW-No

Type: Default

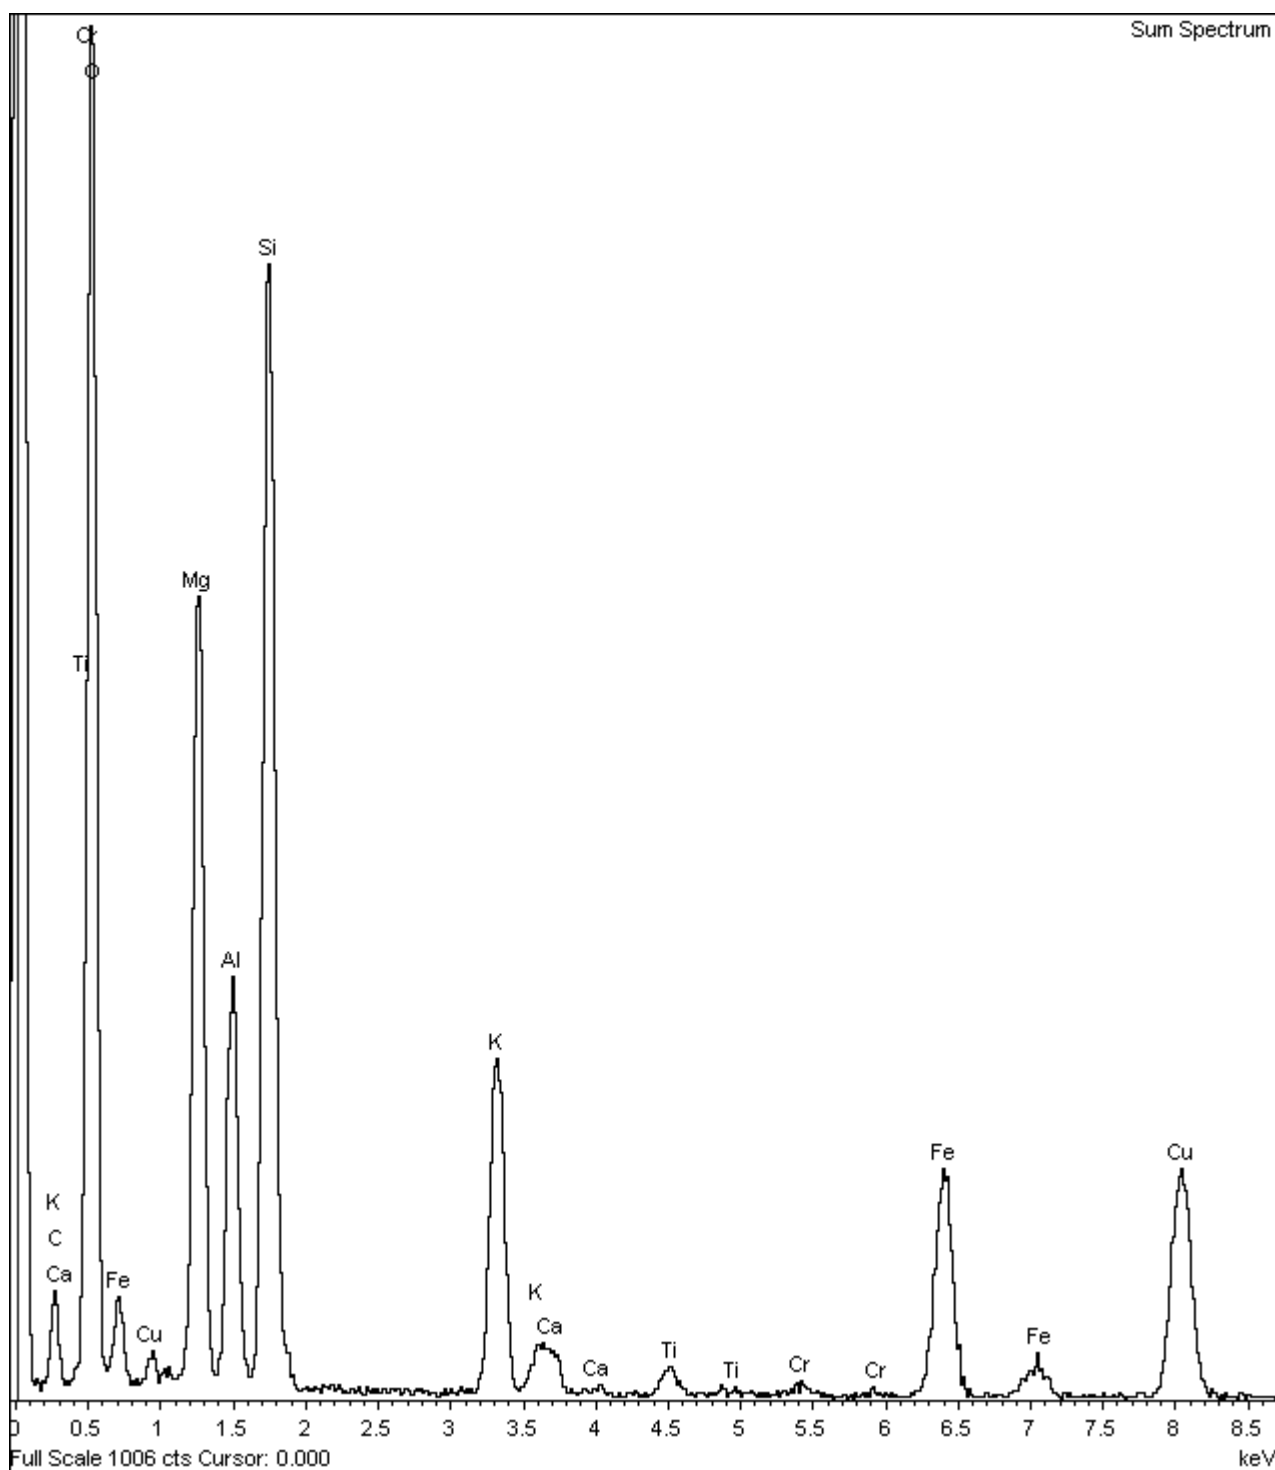

Comment:

# Project 1

10/05/2014 16:27:45

Project: Project 1

Owner: INCA

Sample: L4P-MW-No

Type: Default

| Element | Peak  | Area  | k      | Abs    | Weight% | Weight% | Atomic% |
|---------|-------|-------|--------|--------|---------|---------|---------|
|         | Area  | Sigma | factor | Corrn. |         | Sigma   |         |
| O K     | 14545 | 223   | 1.065  | 1.000  | 38.13   | 0.42    | 53.94   |
| Mg K    | 9738  | 177   | 0.606  | 1.000  | 14.52   | 0.25    | 13.52   |
| Al K    | 4999  | 141   | 0.589  | 1.000  | 7.25    | 0.20    | 6.09    |
| Si K    | 15146 | 220   | 0.569  | 1.000  | 21.22   | 0.29    | 17.10   |
| K K     | 6301  | 142   | 0.552  | 1.000  | 8.56    | 0.19    | 4.96    |
| Ca K    | 796   | 72    | 0.542  | 1.000  | 1.06    | 0.10    | 0.60    |
| Ti K    | 512   | 53    | 0.608  | 1.000  | 0.77    | 0.08    | 0.36    |
| Fe K    | 5084  | 122   | 0.678  | 1.000  | 8.48    | 0.20    | 3.44    |
| Totals  |       |       |        |        | 100.00  |         |         |

| Element | Peak | Area  | k      | Abs    | Weight% | Weight% | Atomic% |
|---------|------|-------|--------|--------|---------|---------|---------|
|         | Area | Sigma | factor | Corrn. |         | Sigma   |         |
| C K     | 148  | 55    | 1.425  | 1.000  | 3.35    | 1.21    | 6.19    |
| O K     | 2074 | 82    | 1.065  | 1.000  | 35.16   | 1.11    | 48.84   |
| Mg K    | 1543 | 68    | 0.606  | 1.000  | 14.87   | 0.65    | 13.60   |
| Al K    | 691  | 52    | 0.589  | 1.000  | 6.48    | 0.48    | 5.34    |
| Si K    | 2381 | 83    | 0.569  | 1.000  | 21.57   | 0.76    | 17.07   |
| K K     | 959  | 54    | 0.552  | 1.000  | 8.42    | 0.47    | 4.79    |
| Ca K    | 97   | 28    | 0.542  | 1.000  | 0.84    | 0.24    | 0.47    |
| Fe K    | 863  | 47    | 0.678  | 1.000  | 9.31    | 0.50    | 3.70    |
| Totals  |      |       |        |        | 100.00  |         |         |
