# Supplementary material for: Heterogeneous Distribution of Interlayer Cations and Iron as a Plausible Explanation of the Non-Exfoliation of Commercial Vermiculites Post Alcohol Treatment and Microwave Irradiation
Source: MDPI journal article supplement (doi:10.3390/min11080835), 2021-08-01
Supplement: s1 [file s1]

Project: Project 1

Owner: INCA

Sample: L4B-MW-Ex

Type: Default

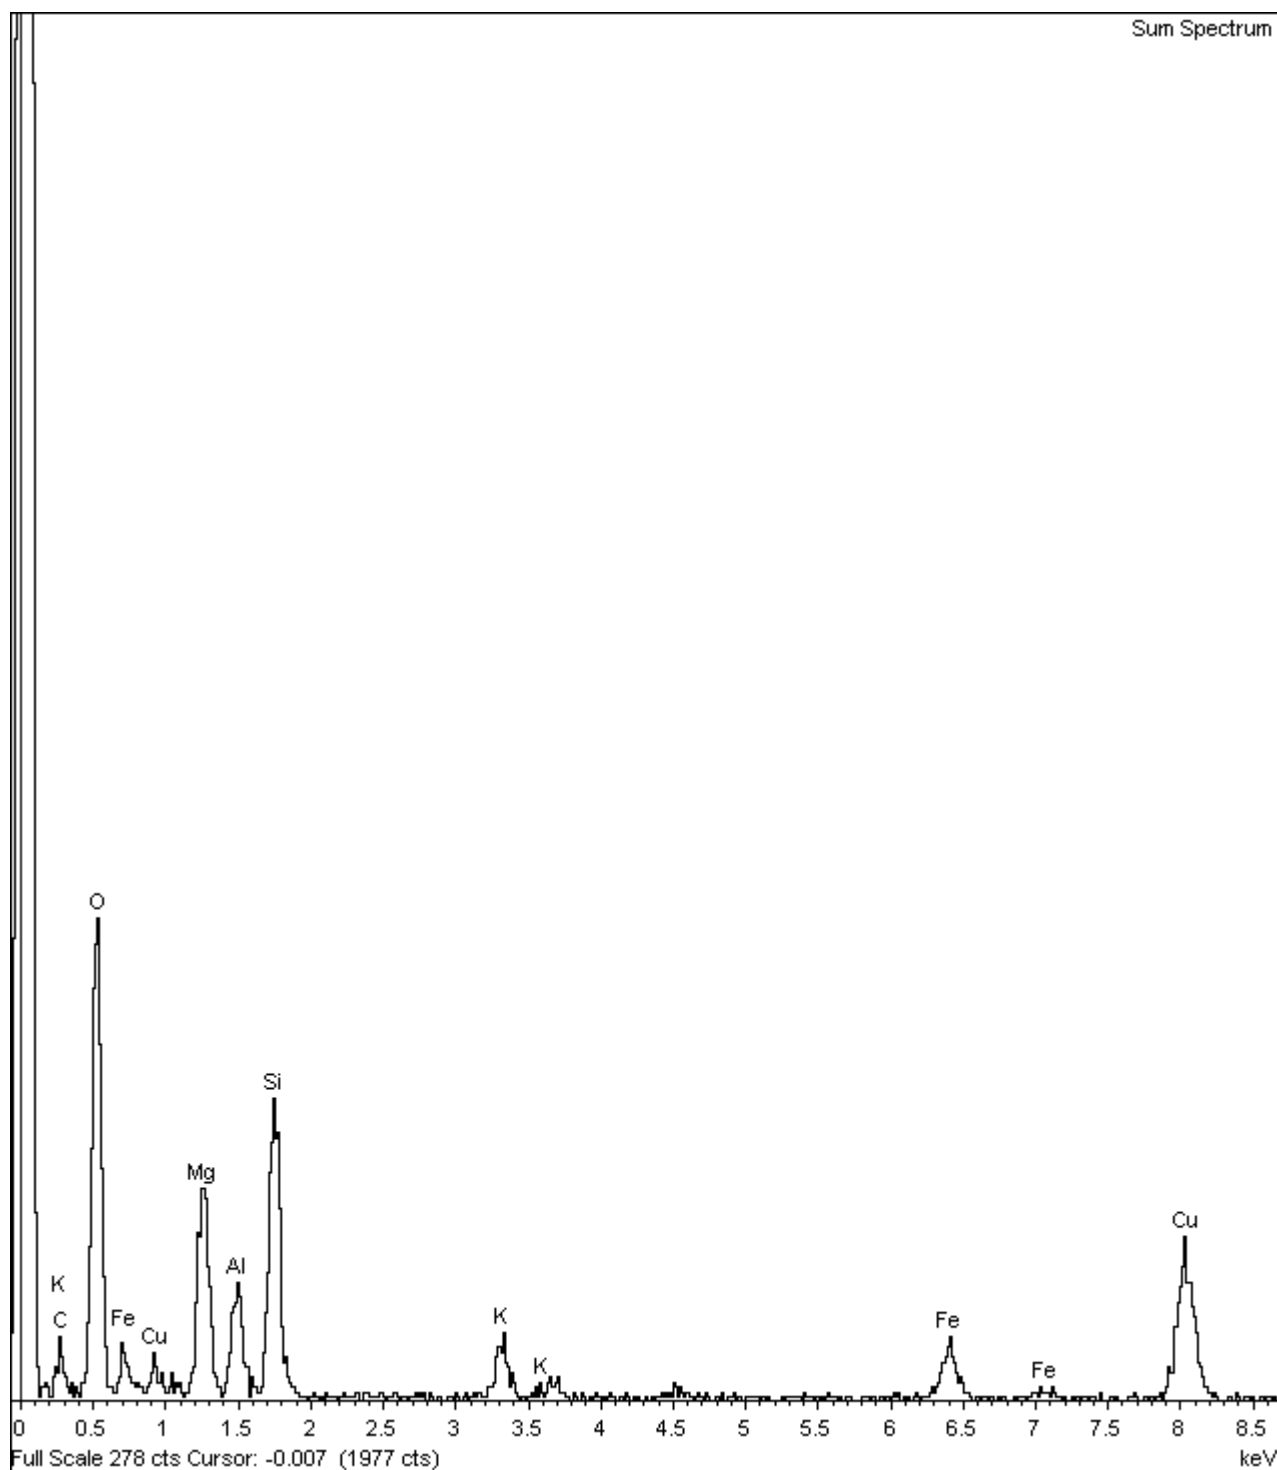

Comment:

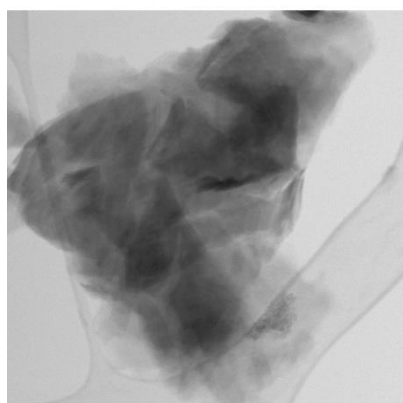

900nm Electron Image 1

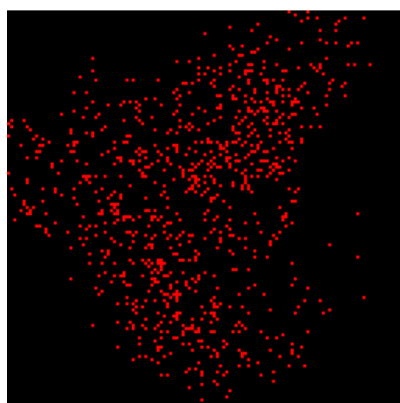

900nm O Ka1

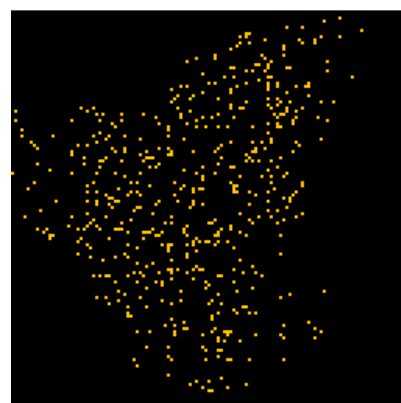

900nm Mg Ka1\_2

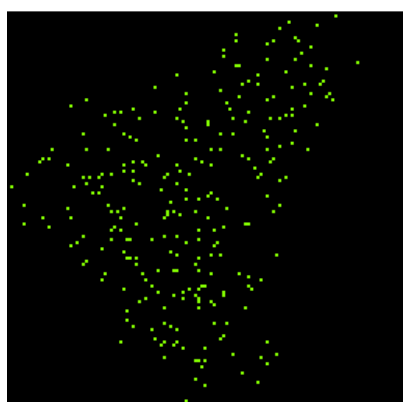

900nm Al Ka1

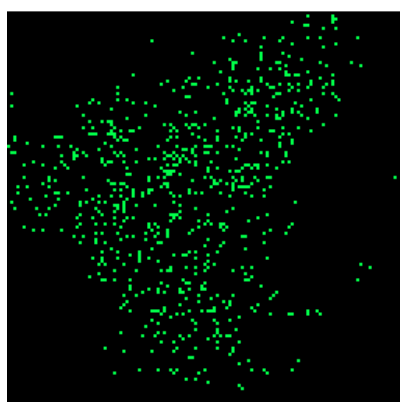

900nm Si Ka1

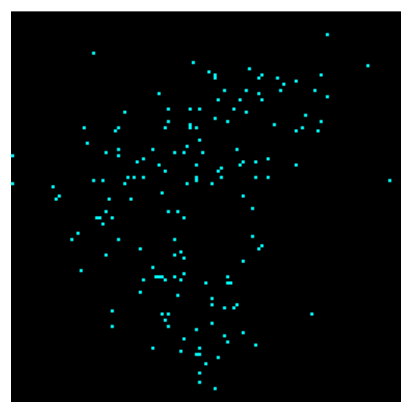

900nm K Ka1

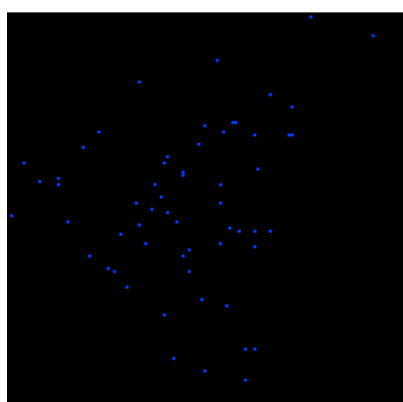

900nm Ca Ka1

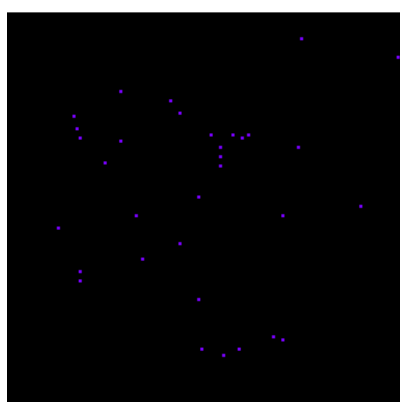

900nm Ti Ka1

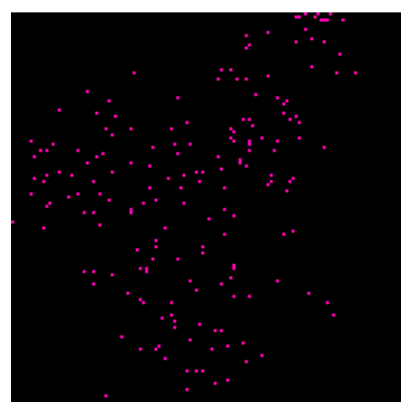

900nm Fe Ka1

Comment:

Project: Project 1

Owner: INCA

Sample: L4B-MW-Ex

Type: Default

| Element | Peak | Area  | k      | Abs    | Weight% | Weight% | Atomic% |
|---------|------|-------|--------|--------|---------|---------|---------|
|         | Area | Sigma | factor | Corrn. |         | Sigma   |         |
| O K     | 1424 | 73    | 1.065  | 1.000  | 47.92   | 1.55    | 63.07   |
| Mg K    | 690  | 48    | 0.606  | 1.000  | 13.20   | 0.89    | 11.43   |
| Al K    | 335  | 38    | 0.589  | 1.000  | 6.25    | 0.68    | 4.88    |
| Si K    | 1098 | 57    | 0.569  | 1.000  | 19.76   | 1.00    | 14.81   |
| K K     | 247  | 30    | 0.552  | 1.000  | 4.31    | 0.51    | 2.32    |
| Ca K    | 84   | 18    | 0.542  | 1.000  | 1.43    | 0.31    | 0.75    |
| Ti K    | 45   | 16    | 0.608  | 1.000  | 0.87    | 0.30    | 0.38    |
| Fe K    | 293  | 29    | 0.678  | 1.000  | 6.27    | 0.61    | 2.36    |
| Totals  |      |       |        |        | 100.00  |         |         |

Project: Project 1

Owner: INCA

Sample: L4B-MW-Ex

Type: Default

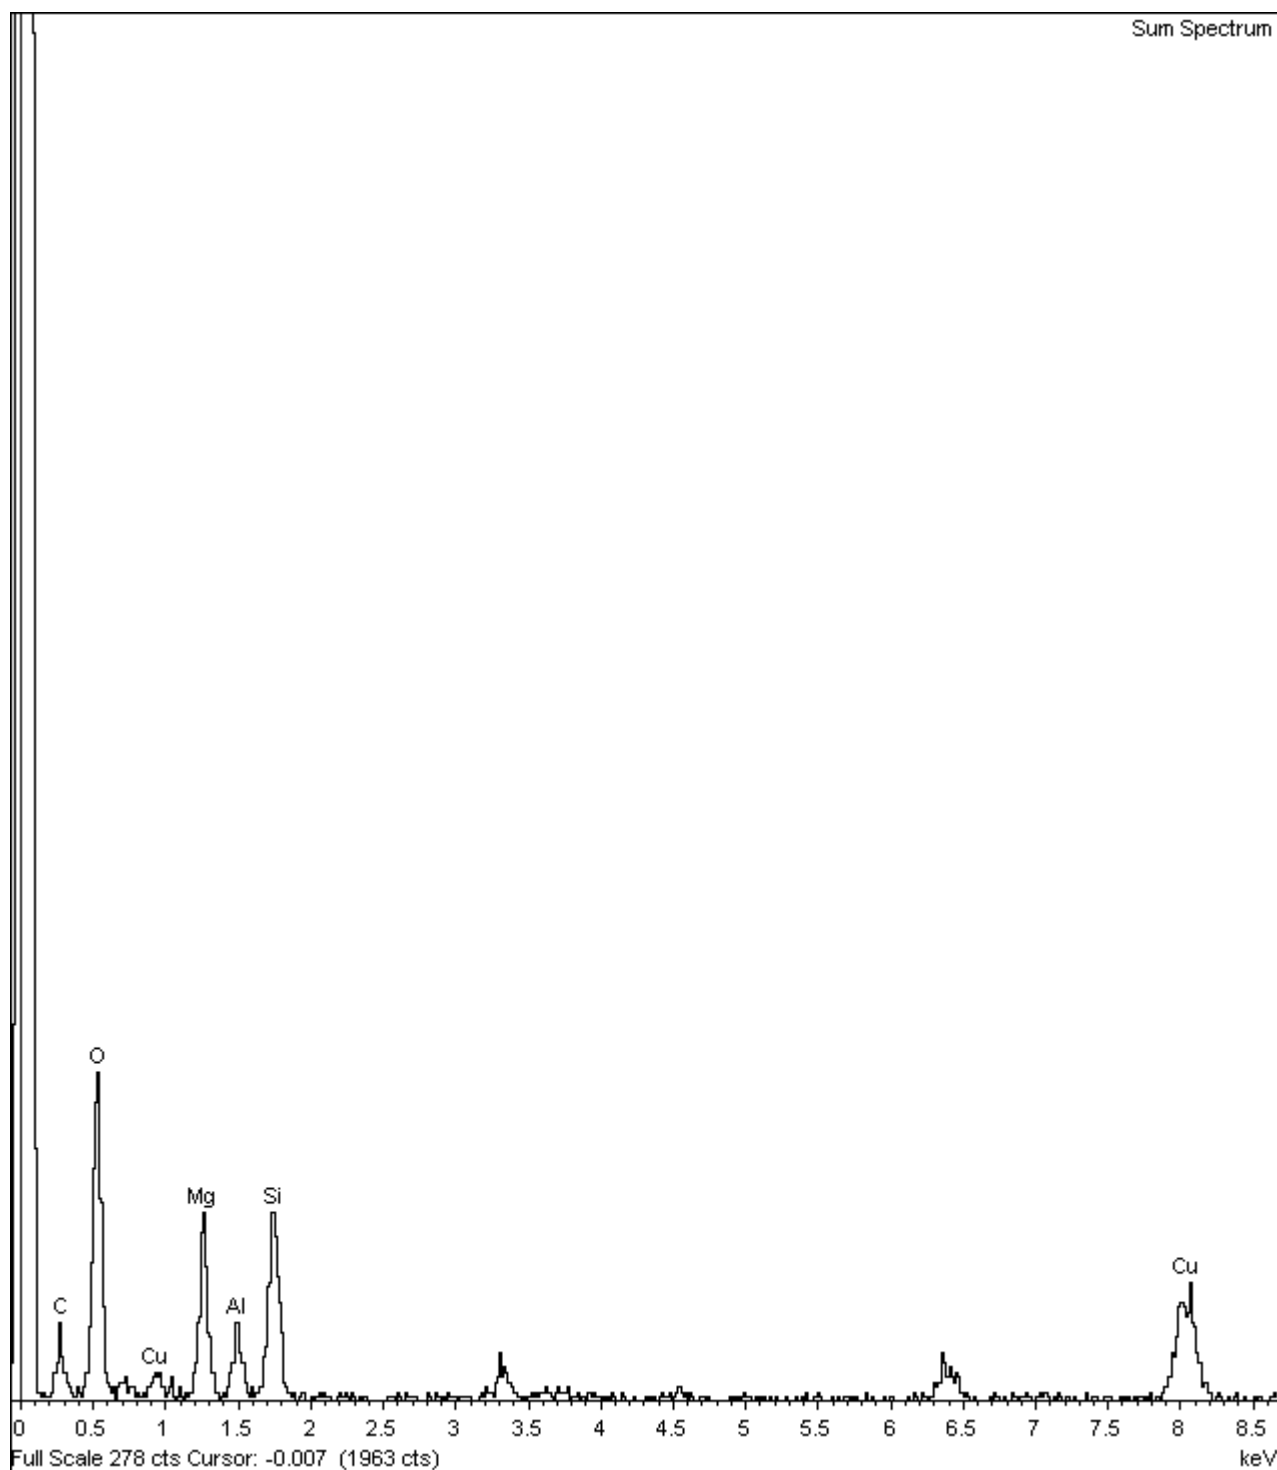

Comment:

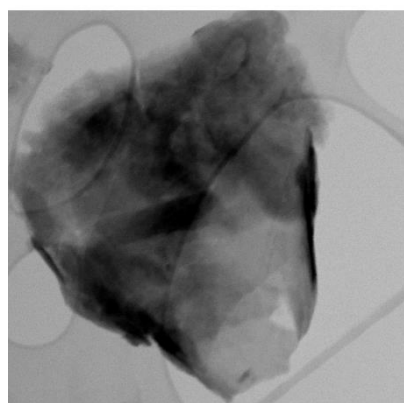

700nm Electron Image 1

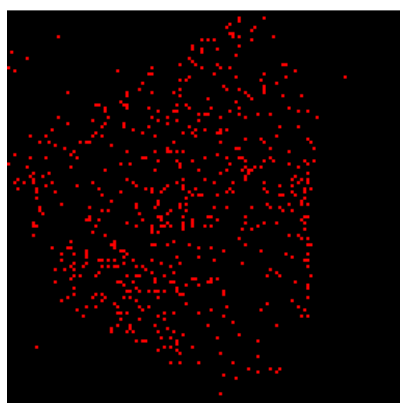

700nm O Ka1

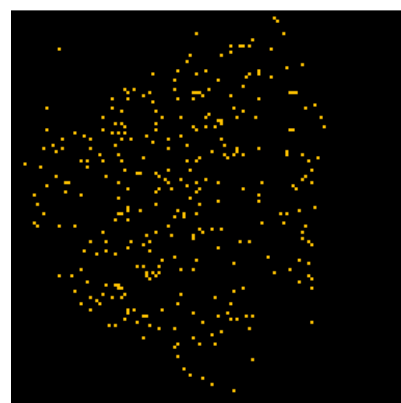

700nm Mg Ka1\_2

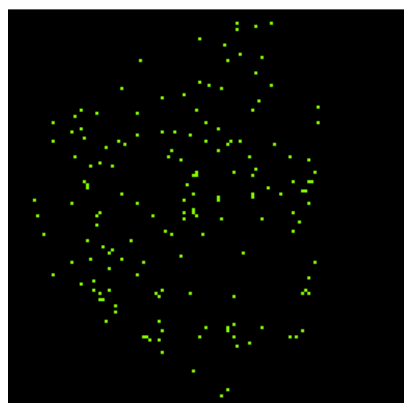

700nm Al Ka1

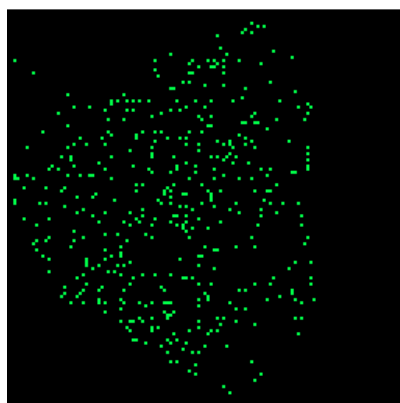

700nm Si Ka1

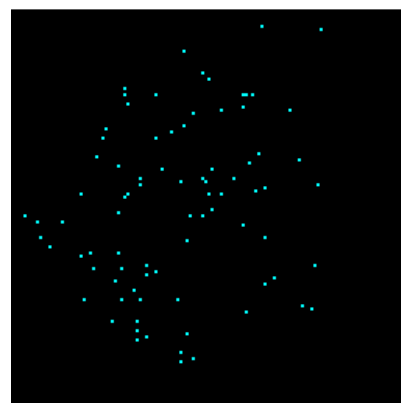

700nm K Ka1

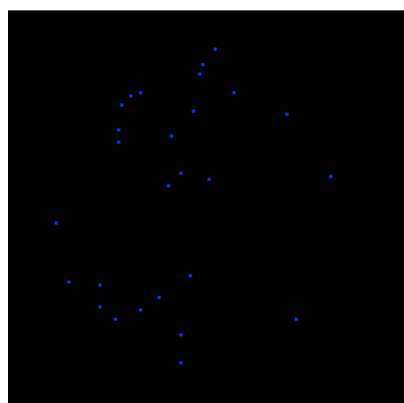

700nm Ca Ka1

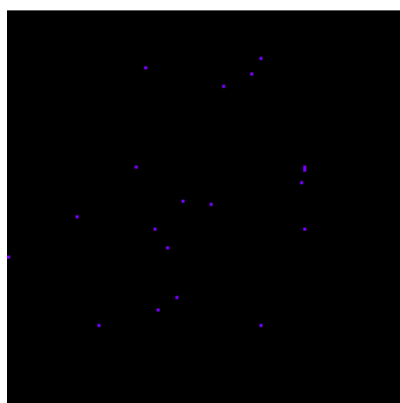

700nm Ti Ka1

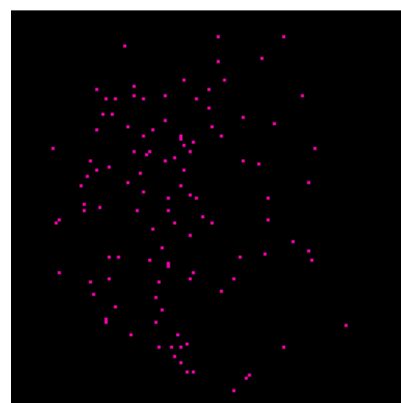

700nm Fe Ka1

Comment:

Project: Project 1

Owner: INCA

Sample: L4B-MW-Ex

Type: Default

| Element | Peak | Area  | k      | Abs    | Weight% | Weight% | Atomic% |
|---------|------|-------|--------|--------|---------|---------|---------|
|         | Area | Sigma | factor | Corrn. |         | Sigma   |         |
| O K     | 907  | 57    | 1.065  | 1.000  | 50.30   | 1.97    | 64.82   |
| Mg K    | 439  | 38    | 0.606  | 1.000  | 13.83   | 1.15    | 11.72   |
| Al K    | 229  | 29    | 0.589  | 1.000  | 7.02    | 0.87    | 5.36    |
| Si K    | 627  | 44    | 0.569  | 1.000  | 18.57   | 1.27    | 13.63   |
| K K     | 122  | 22    | 0.552  | 1.000  | 3.50    | 0.63    | 1.84    |
| Ca K    | 15   | 16    | 0.542  | 1.000  | 0.41    | 0.44    | 0.21    |
| Ti K    | 26   | 13    | 0.608  | 1.000  | 0.83    | 0.40    | 0.36    |
| Fe K    | 157  | 24    | 0.678  | 1.000  | 5.54    | 0.82    | 2.05    |
| Totals  |      |       |        |        | 100.00  |         |         |

Project: Project 1

Owner: INCA

Sample: L4B-MW-Ex

Type: Default

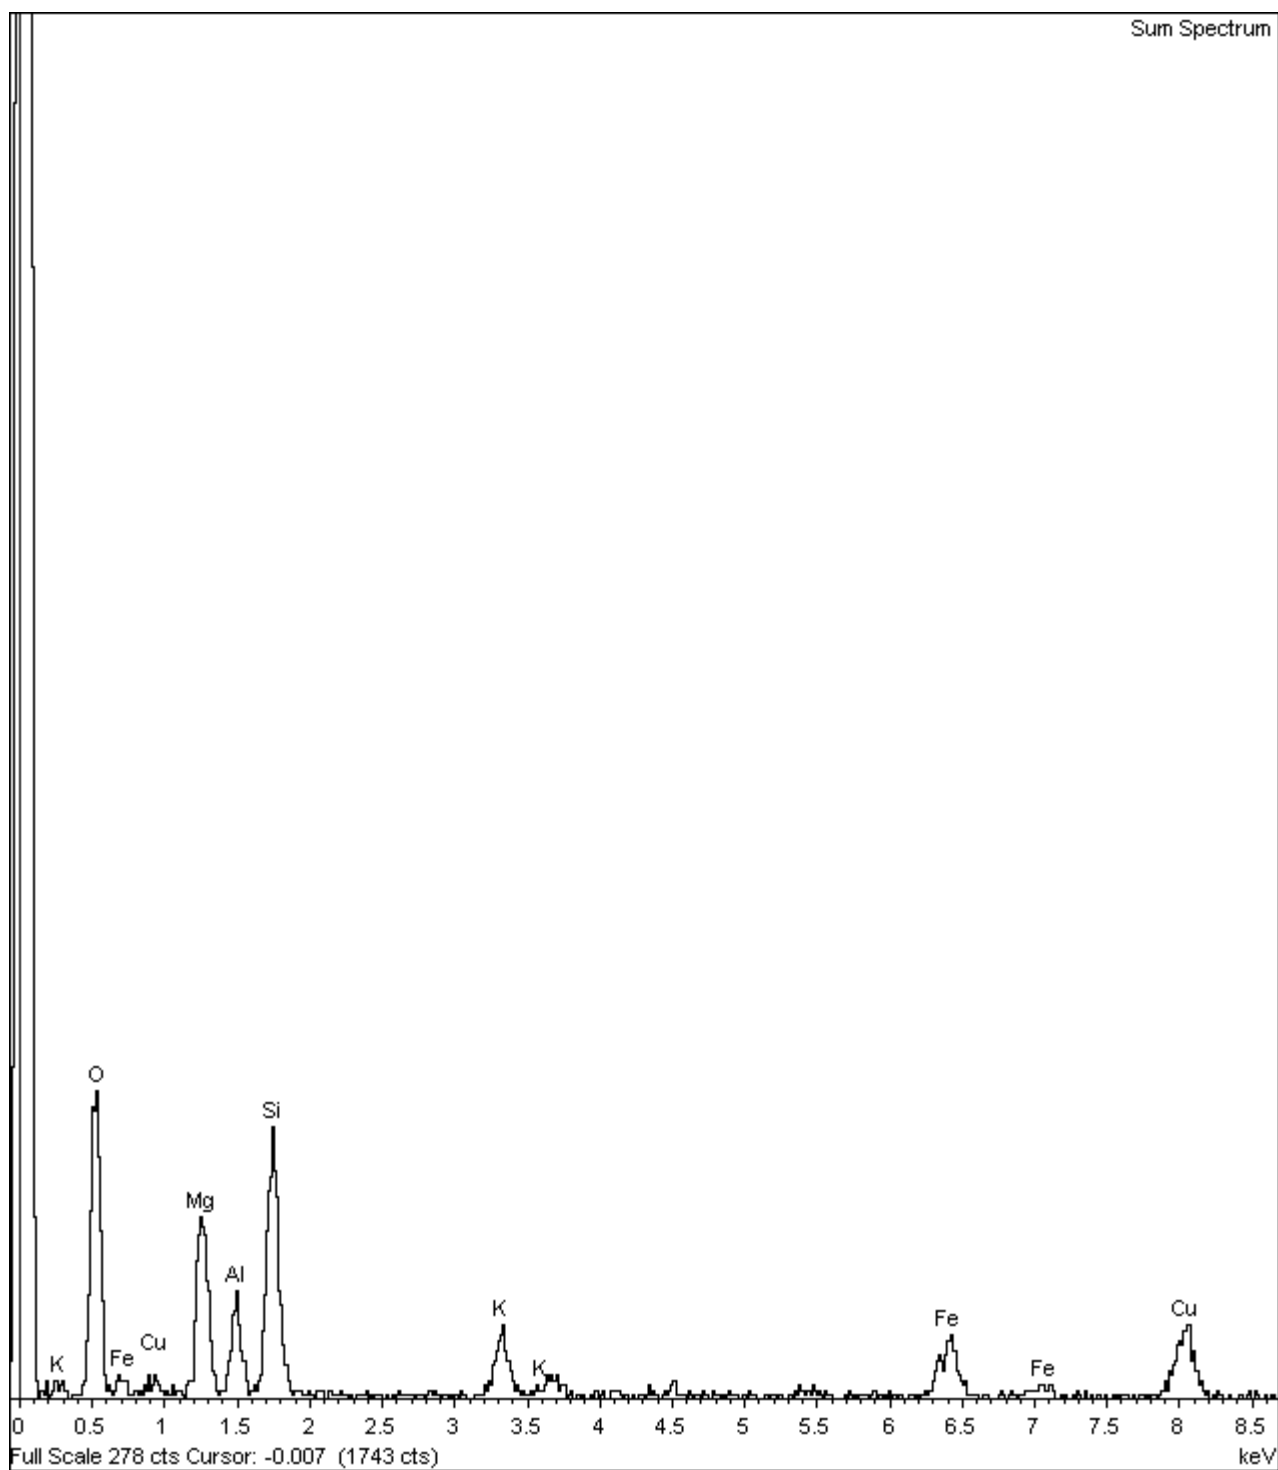

Comment:

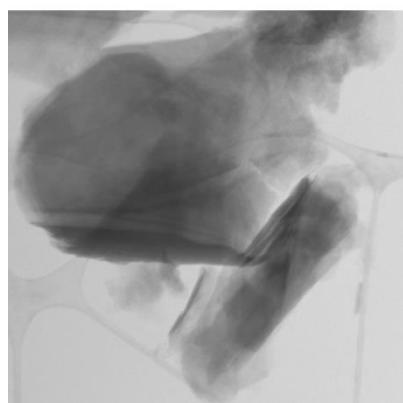

1µm Electron Image 1

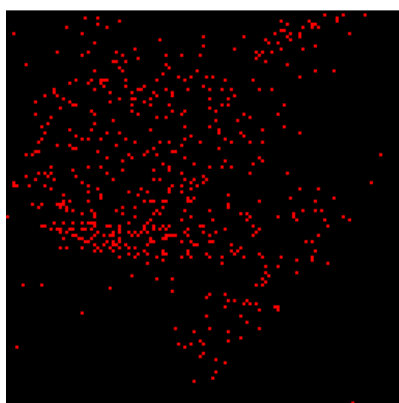

1µm O Ka1

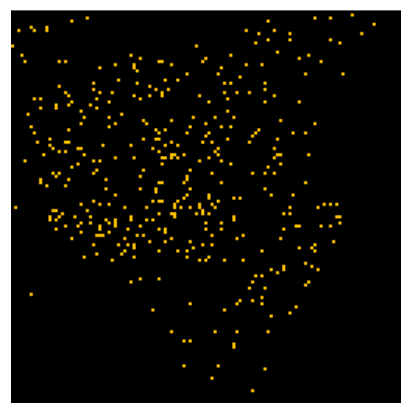

1µm Mg Ka1\_2

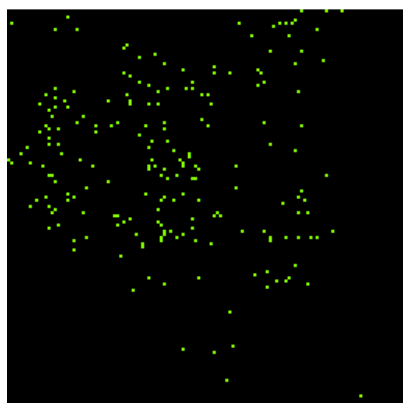

1µm Al Ka1

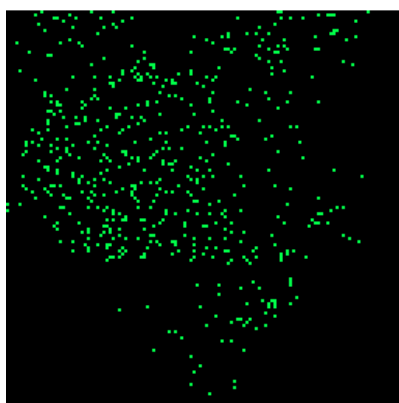

1µm Si Ka1

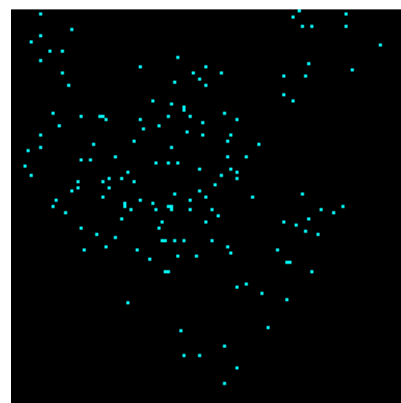

1µm K Ka1

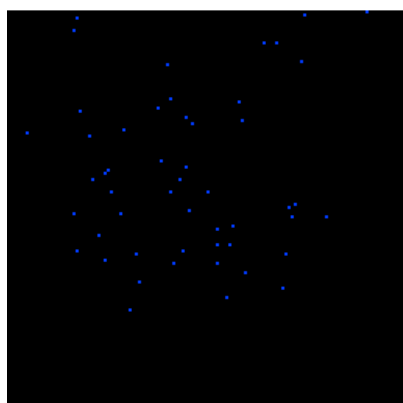

1µm Ca Ka1

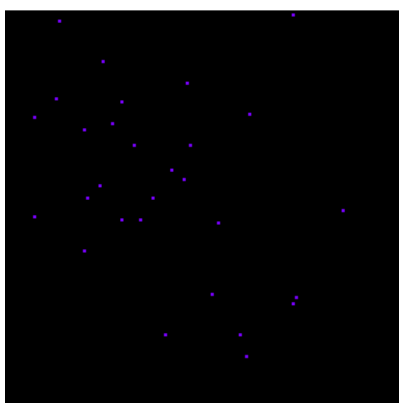

1µm Ti Ka1

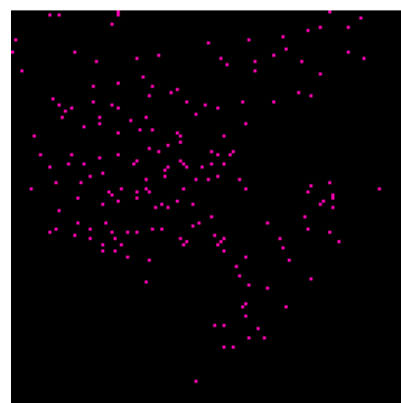

1µm Fe Ka1

Comment:



Project: Project 1

Owner: INCA

Sample: L4B-MW-Ex

Type: Default

| Element | Peak | Area  | k      | Abs    | Weight% | Weight% | Atomic% |
|---------|------|-------|--------|--------|---------|---------|---------|
|         | Area | Sigma | factor | Corrn. |         | Sigma   |         |
| O K     | 926  | 59    | 1.065  | 1.000  | 40.25   | 1.77    | 56.04   |
| Mg K    | 591  | 44    | 0.606  | 1.000  | 14.61   | 1.05    | 13.39   |
| Al K    | 295  | 34    | 0.589  | 1.000  | 7.10    | 0.80    | 5.86    |
| Si K    | 892  | 54    | 0.569  | 1.000  | 20.71   | 1.19    | 16.43   |
| K K     | 271  | 31    | 0.552  | 1.000  | 6.10    | 0.69    | 3.48    |
| Ca K    | 68   | 19    | 0.542  | 1.000  | 1.51    | 0.41    | 0.84    |
| Ti K    | 49   | 15    | 0.608  | 1.000  | 1.23    | 0.38    | 0.57    |
| Fe K    | 307  | 32    | 0.678  | 1.000  | 8.50    | 0.85    | 3.39    |
| Totals  |      |       |        |        | 100.00  |         |         |

Project: Project 1

Owner: INCA

Sample: L4B-MW-Ex

Type: Default

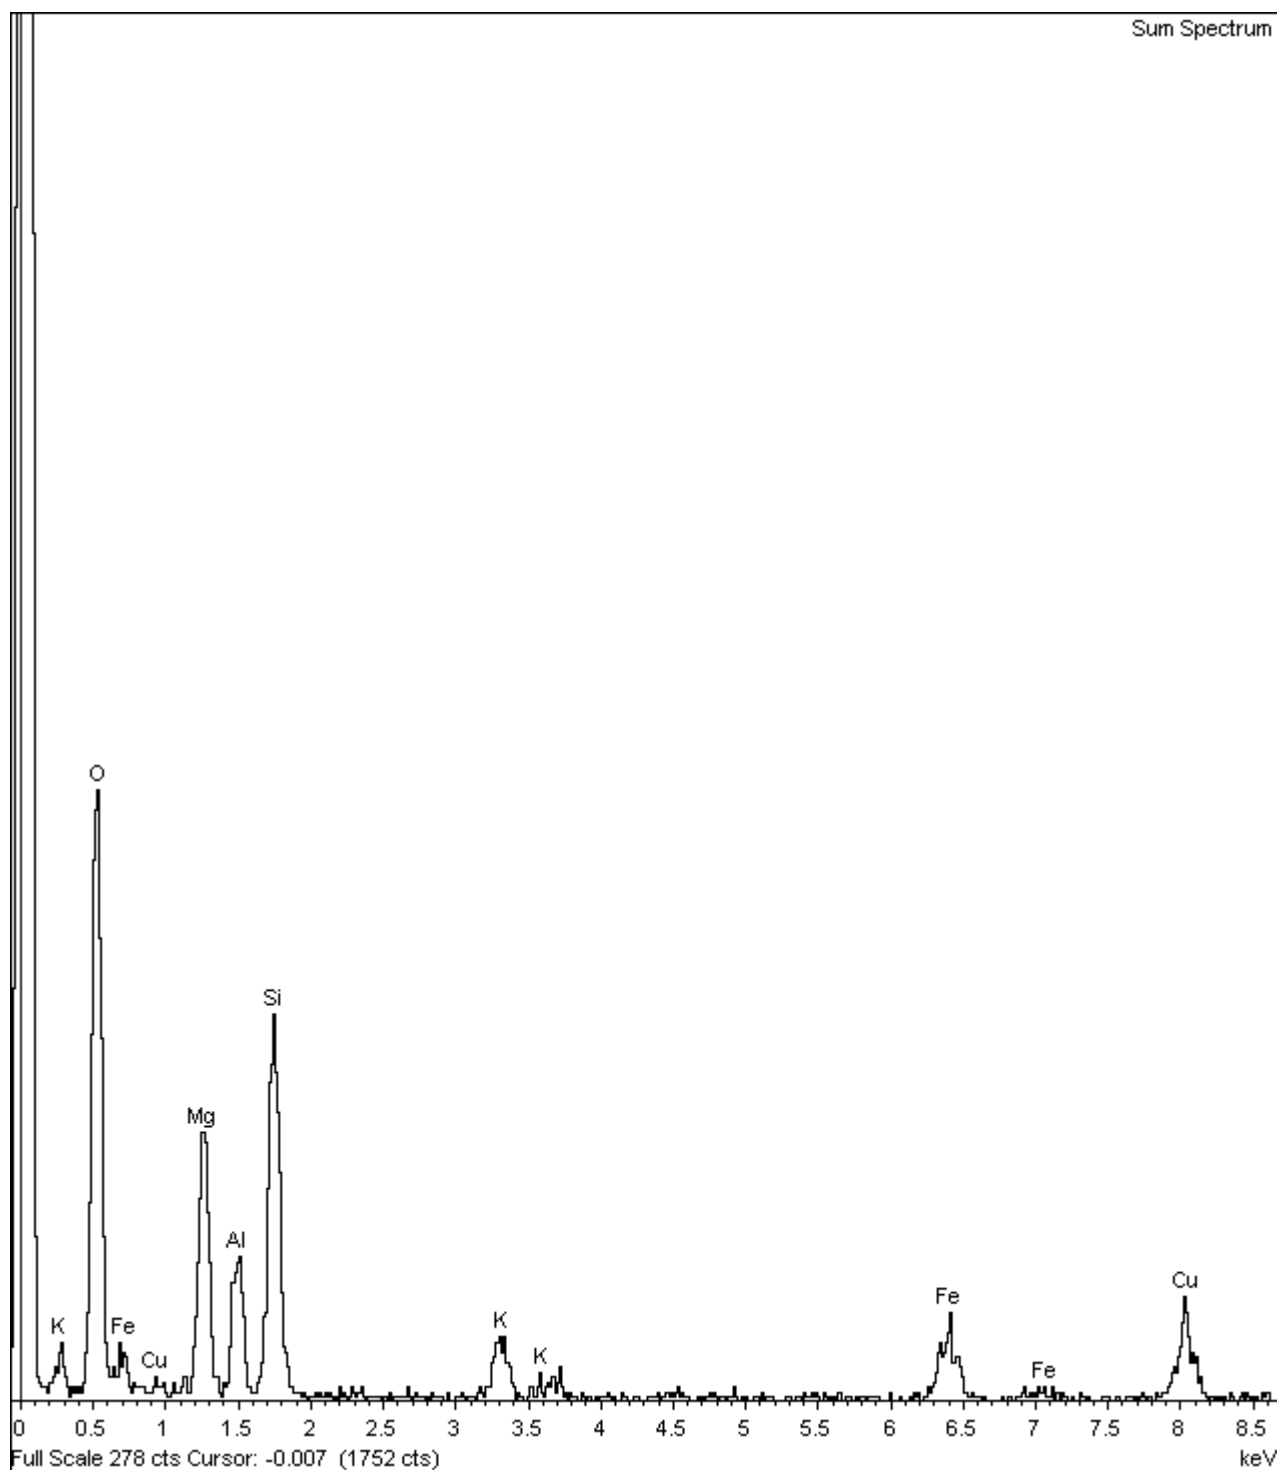

Comment:

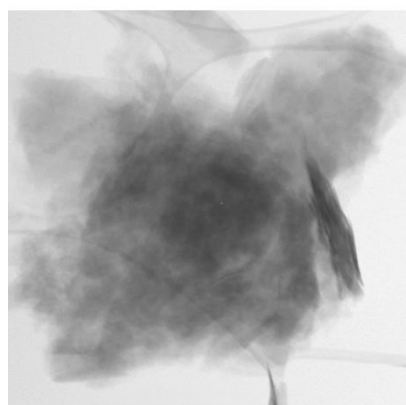

900nm Electron Image 1

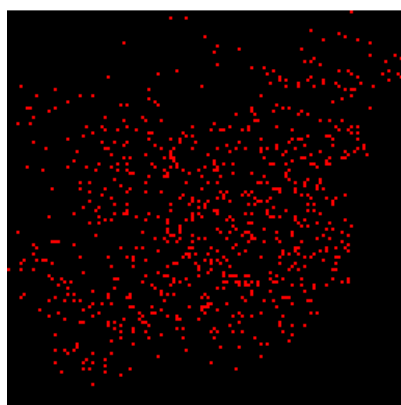

900nm O Ka1

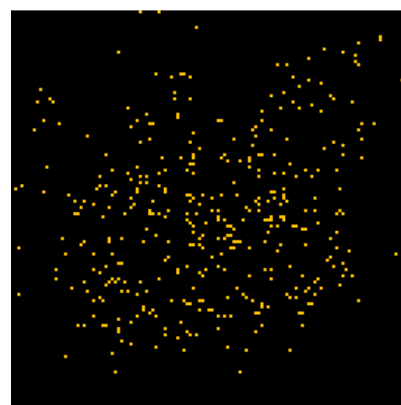

900nm Mg Ka1\_2

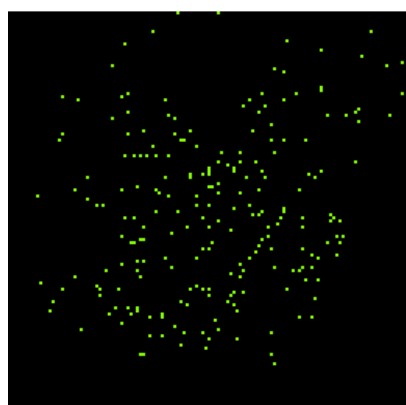

900nm Al Ka1

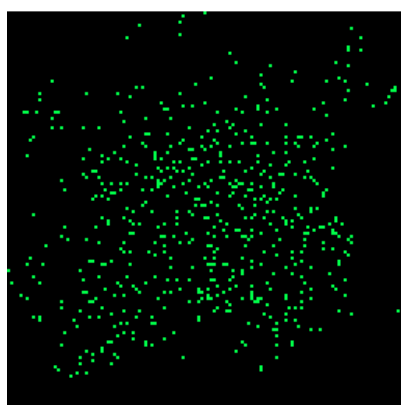

900nm Si Ka1

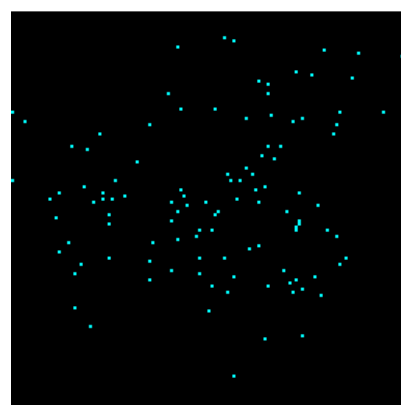

900nm K Ka1

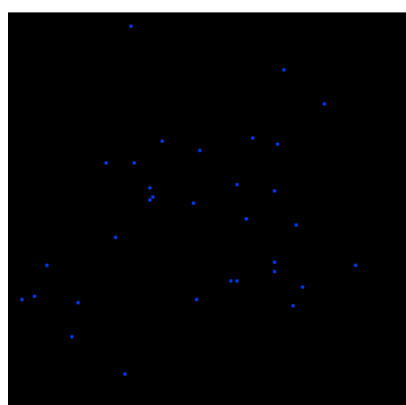

900nm Ca Ka1

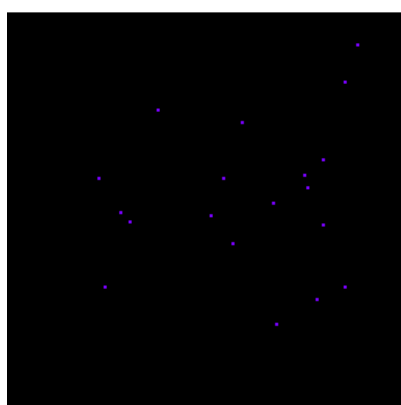

900nm Ti Ka1

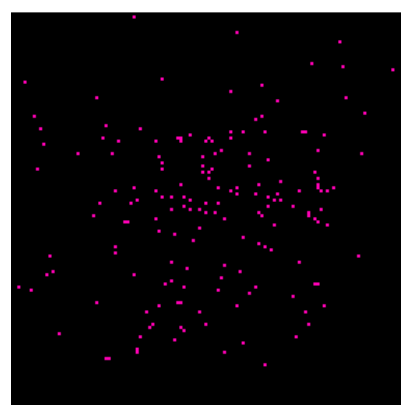

900nm Fe Ka1

Comment:

Project: Project 1

Owner: INCA

Sample: L4B-MW-Ex

Type: Default

| Element | Peak | Area  | k      | Abs    | Weight% | Weight% | Atomic% |
|---------|------|-------|--------|--------|---------|---------|---------|
|         | Area | Sigma | factor | Corrn. |         | Sigma   |         |
| O K     | 1825 | 84    | 1.065  | 1.000  | 48.35   | 1.38    | 63.27   |
| Mg K    | 881  | 53    | 0.606  | 1.000  | 13.27   | 0.77    | 11.42   |
| Al K    | 477  | 42    | 0.589  | 1.000  | 6.99    | 0.61    | 5.43    |
| Si K    | 1388 | 66    | 0.569  | 1.000  | 19.65   | 0.90    | 14.65   |
| K K     | 293  | 32    | 0.552  | 1.000  | 4.03    | 0.43    | 2.16    |
| Ca K    | 76   | 20    | 0.542  | 1.000  | 1.02    | 0.26    | 0.53    |
| Ti K    | 35   | 14    | 0.608  | 1.000  | 0.53    | 0.20    | 0.23    |
| Fe K    | 365  | 34    | 0.678  | 1.000  | 6.16    | 0.56    | 2.31    |
| Totals  |      |       |        |        | 100.00  |         |         |

Project: Project 1

Owner: INCA

Sample: L4B-MW-Ex

Type: Default

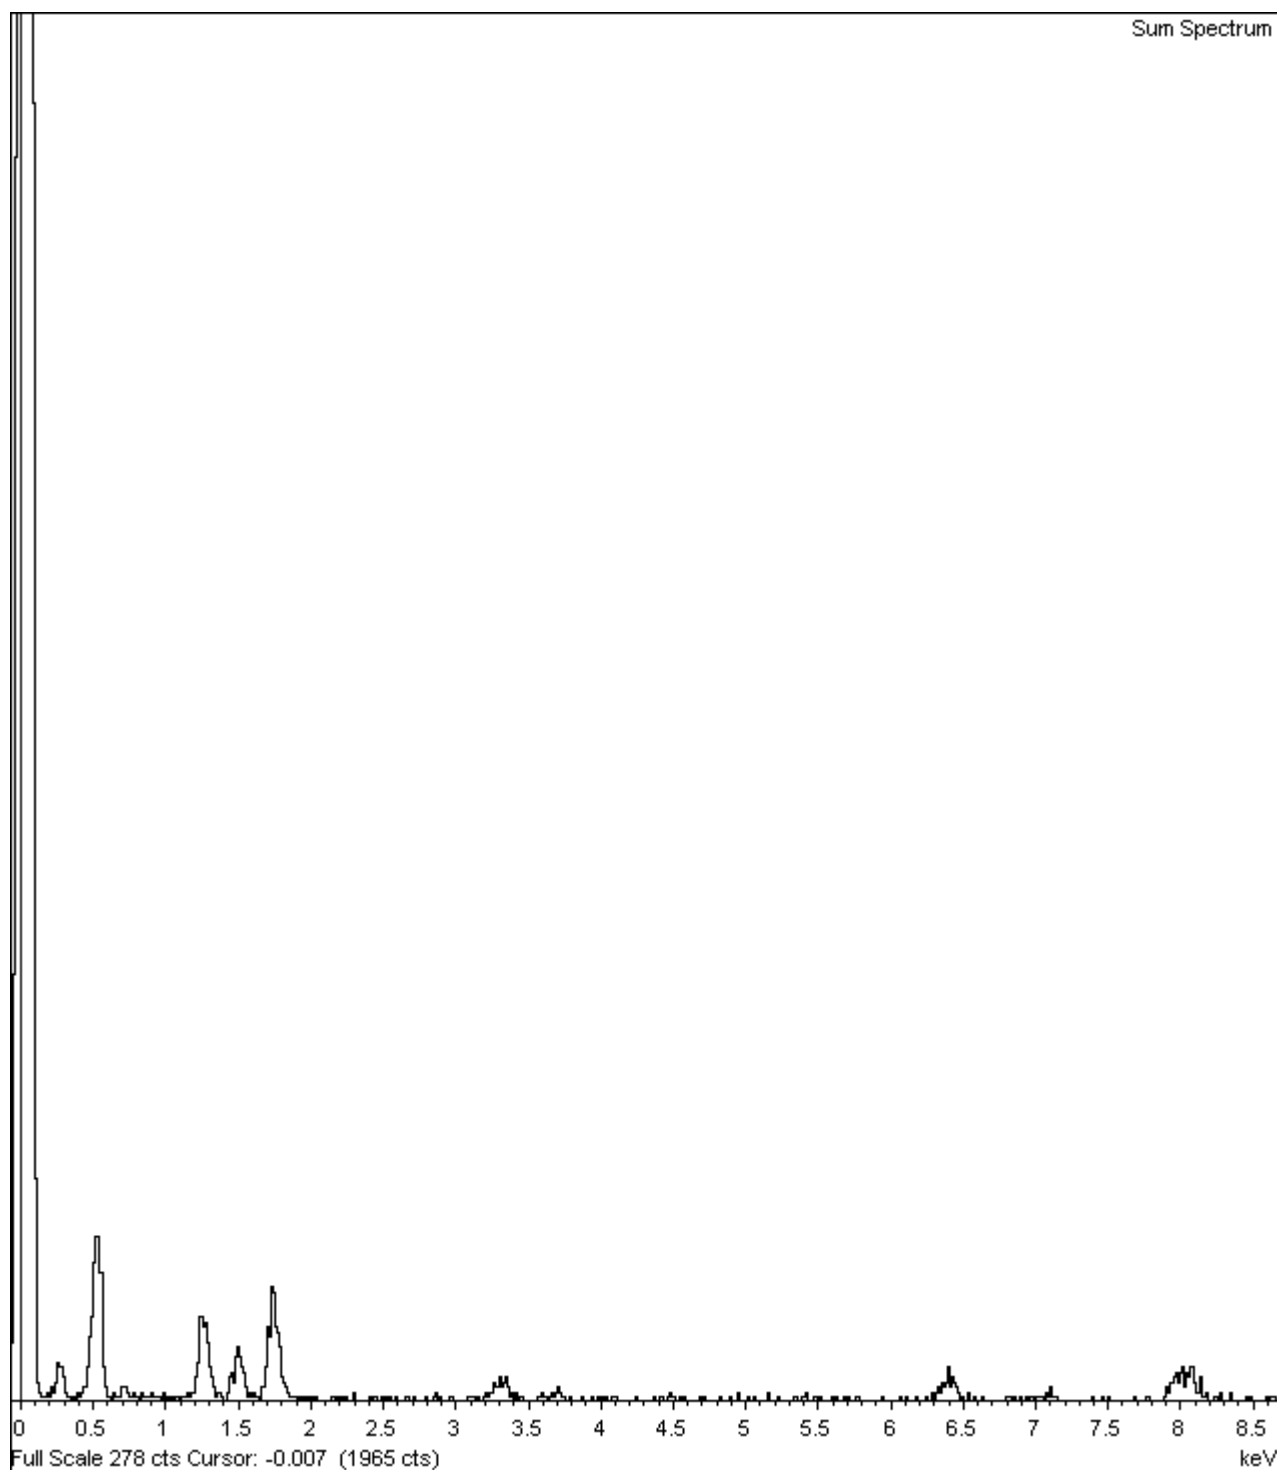

Comment:

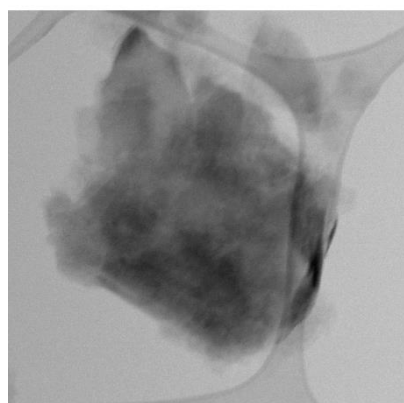

600nm Electron Image 1

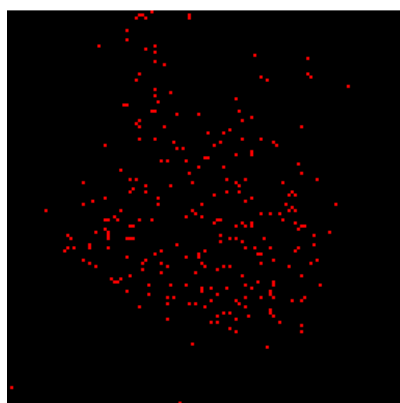

600nm O Ka1

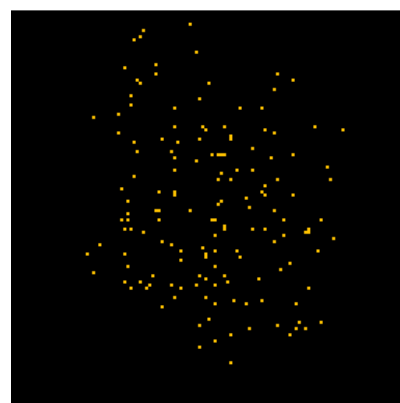

600nm Mg Ka1\_2

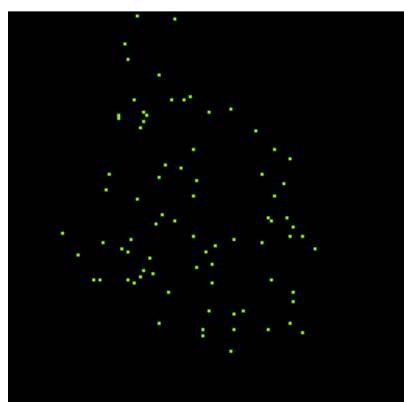

600nm Al Ka1

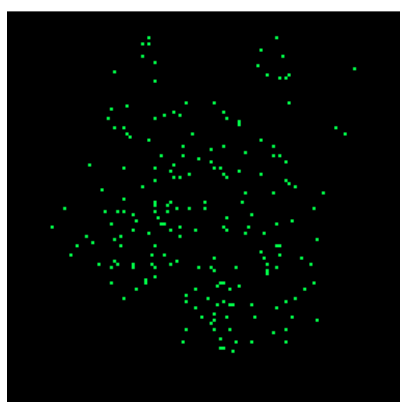

600nm Si Ka1

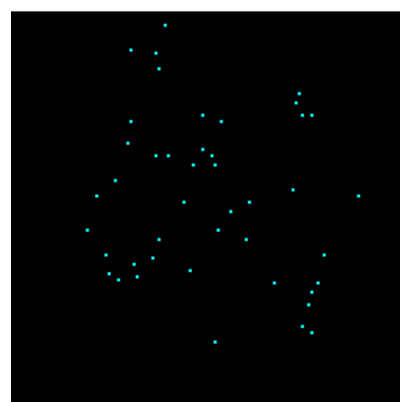

600nm K Ka1

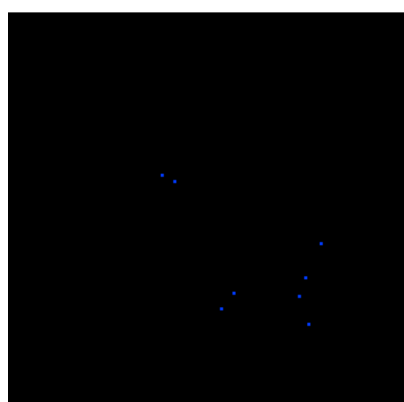

600nm Ca Ka1

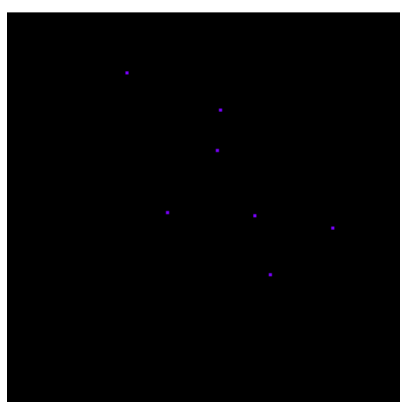

600nm Ti Ka1

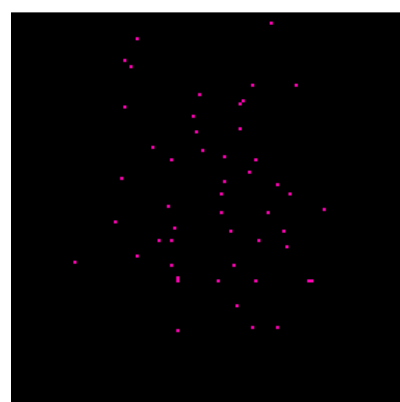

600nm Fe Ka1

Comment:

Project: Project 1

Owner: INCA

Sample: L4B-MW-Ex

Type: Default

| Element | Peak | Area  | k      | Abs   | Weight% | Weight% | Atomic% |
|---------|------|-------|--------|-------|---------|---------|---------|
|         | Area | Sigma | factor | Corn. |         | Sigma   |         |
| O K     | 503  | 44    | 1.065  | 1.000 | 47.71   | 2.63    | 63.00   |
| Mg K    | 257  | 29    | 0.606  | 1.000 | 13.88   | 1.52    | 12.06   |
| Al K    | 148  | 24    | 0.589  | 1.000 | 7.77    | 1.21    | 6.09    |
| Si K    | 336  | 33    | 0.569  | 1.000 | 17.03   | 1.64    | 12.81   |
| K K     | 80   | 17    | 0.552  | 1.000 | 3.95    | 0.84    | 2.14    |
| Ca K    | 32   | 12    | 0.542  | 1.000 | 1.54    | 0.58    | 0.81    |
| Ti K    | 7    | 13    | 0.608  | 1.000 | 0.38    | 0.69    | 0.17    |
| Fe K    | 128  | 18    | 0.678  | 1.000 | 7.74    | 1.10    | 2.93    |
| Totals  |      |       |        |       | 100.00  |         |         |
