# Supplementary material for: Heterogeneous Distribution of Interlayer Cations and Iron as a Plausible Explanation of the Non-Exfoliation of Commercial Vermiculites Post Alcohol Treatment and Microwave Irradiation
Source: MDPI journal article supplement (doi:10.3390/min11080835), 2021-08-01
Supplement: s1 [file s1]

LPE

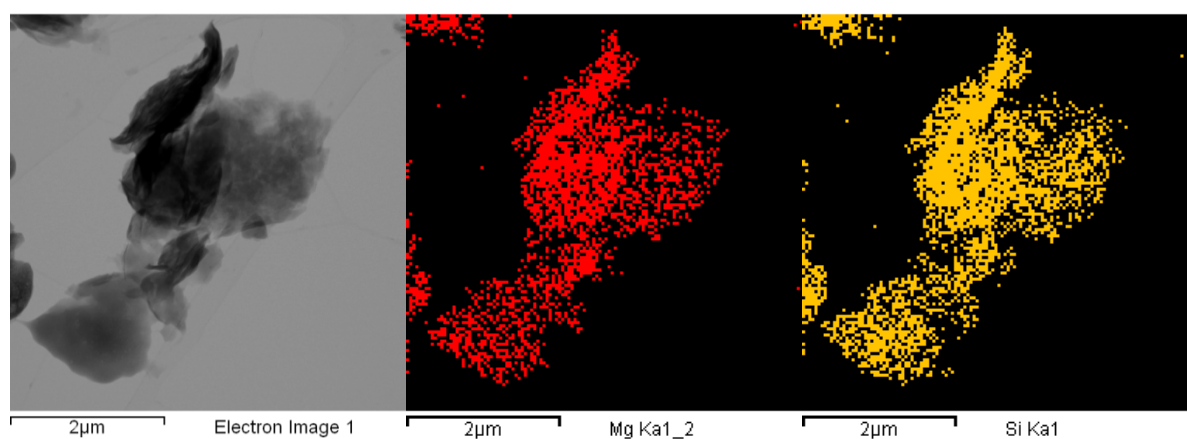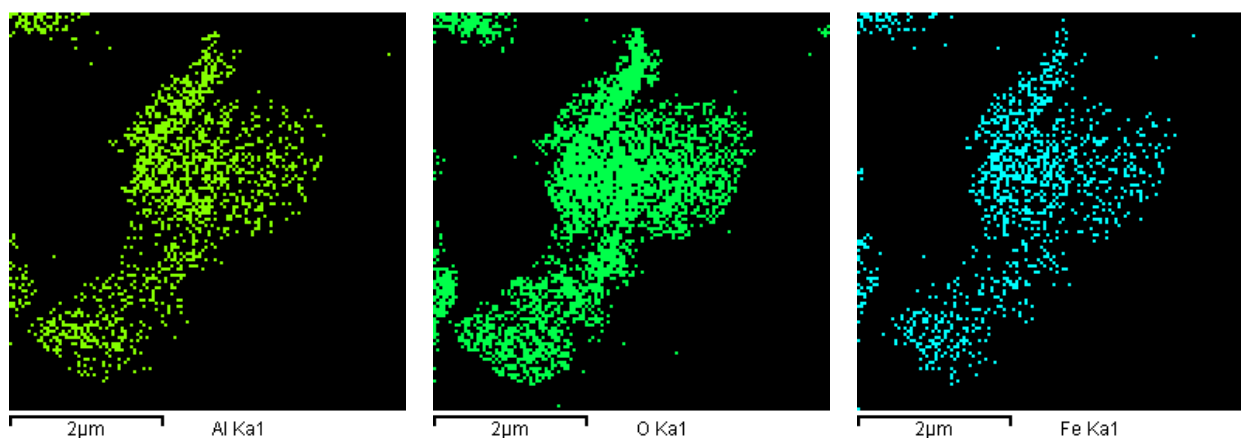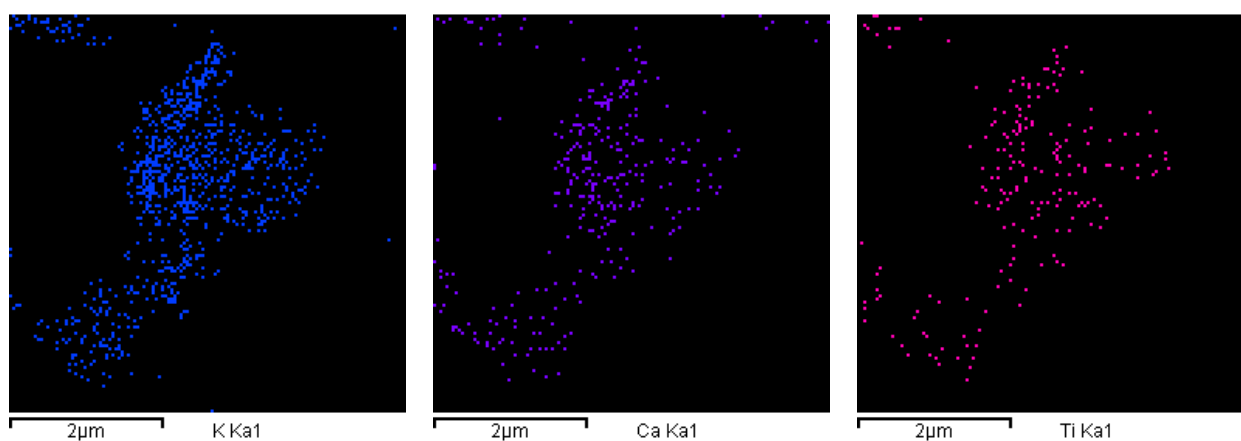

Comment:

Project: Project 1

Owner: INCA

Sample: L4P-MW-ex

Type: Default

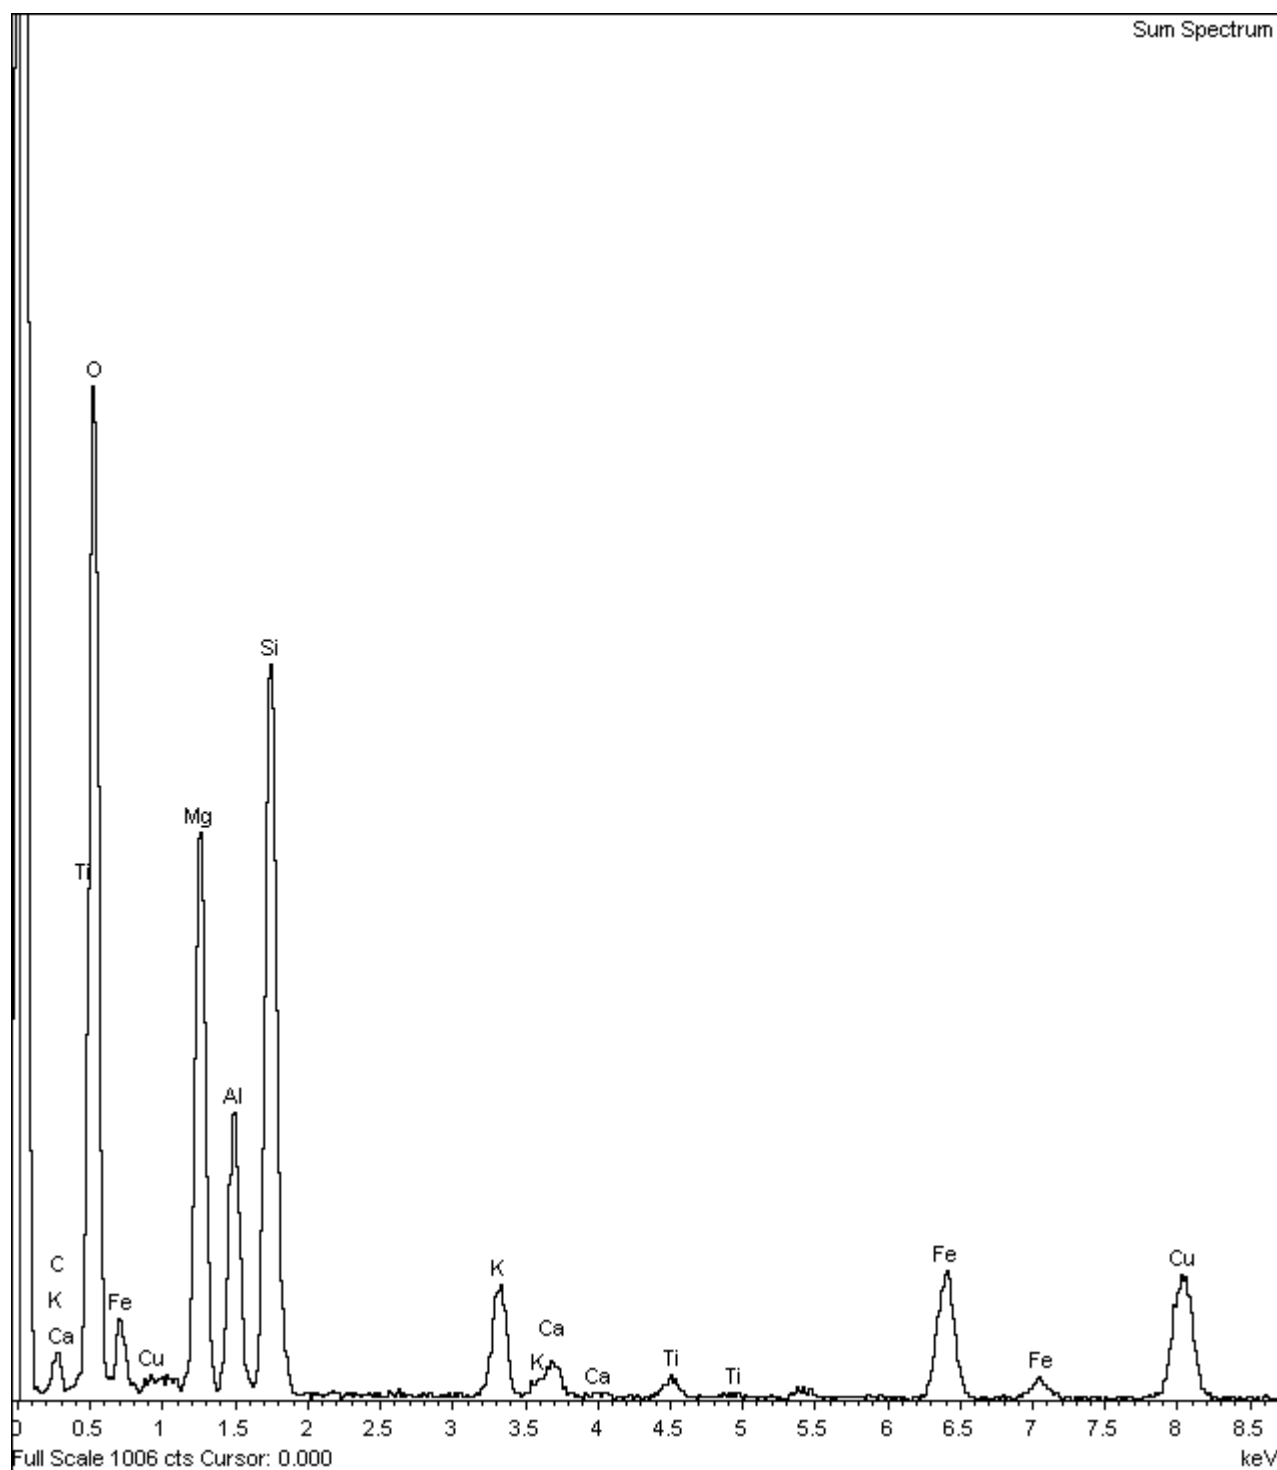

Comment:

| Element | Peak  | Area  | k      | Abs    | Weight% | Weight% | Atomic% |
|---------|-------|-------|--------|--------|---------|---------|---------|
|         | Area  | Sigma | factor | Corrn. |         | Sigma   |         |
| O K     | 10845 | 193   | 1.065  | 1.000  | 42.88   | 0.52    | 58.03   |
| Mg K    | 6969  | 147   | 0.606  | 1.000  | 15.67   | 0.32    | 13.96   |
| Al K    | 3327  | 116   | 0.589  | 1.000  | 7.28    | 0.25    | 5.84    |
| Si K    | 9841  | 175   | 0.569  | 1.000  | 20.79   | 0.35    | 16.03   |
| K K     | 2086  | 85    | 0.552  | 1.000  | 4.27    | 0.17    | 2.37    |
| Ca K    | 599   | 55    | 0.542  | 1.000  | 1.21    | 0.11    | 0.65    |
| Ti K    | 356   | 43    | 0.608  | 1.000  | 0.80    | 0.10    | 0.36    |
| Fe K    | 2820  | 90    | 0.678  | 1.000  | 7.10    | 0.22    | 2.75    |
| Totals  |       |       |        |        | 100.00  |         |         |

| Element | Peak | Area  | k      | Abs    | Weight% | Weight% | Atomic% |
|---------|------|-------|--------|--------|---------|---------|---------|
|         | Area | Sigma | factor | Corrn. |         | Sigma   |         |
| O K     | 1481 | 75    | 1.065  | 1.000  | 42.32   | 1.43    | 57.72   |
| Mg K    | 922  | 54    | 0.606  | 1.000  | 14.98   | 0.84    | 13.45   |
| Al K    | 489  | 43    | 0.589  | 1.000  | 7.73    | 0.66    | 6.25    |
| Si K    | 1324 | 64    | 0.569  | 1.000  | 20.22   | 0.93    | 15.71   |
| K K     | 306  | 31    | 0.552  | 1.000  | 4.53    | 0.45    | 2.53    |
| Ca K    | 134  | 21    | 0.542  | 1.000  | 1.95    | 0.30    | 1.06    |
| Ti K    | 43   | 14    | 0.608  | 1.000  | 0.70    | 0.23    | 0.32    |
| Fe K    | 416  | 32    | 0.678  | 1.000  | 7.56    | 0.58    | 2.95    |
| Totals  |      |       |        |        | 100.00  |         |         |

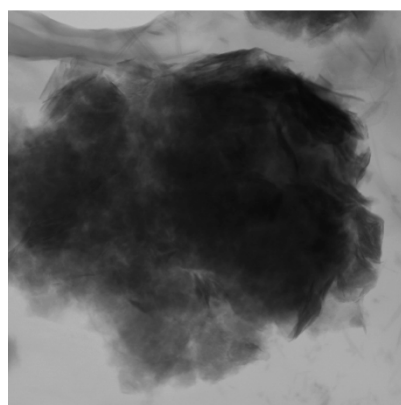

3µm Electron Image 1

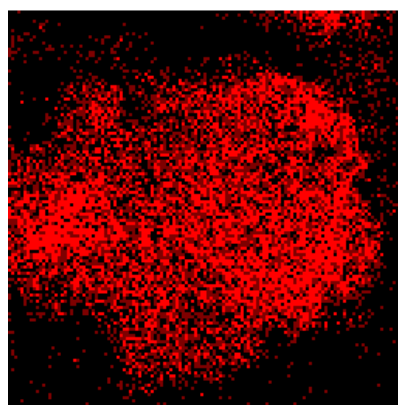

3µm O Ka1

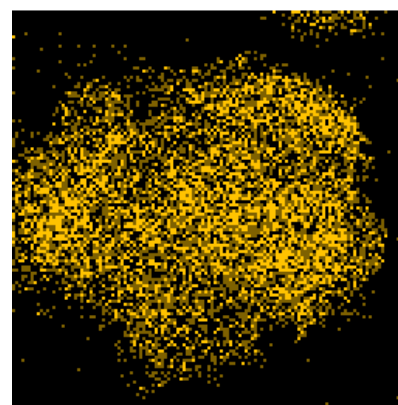

3µm Mg Ka1\_2

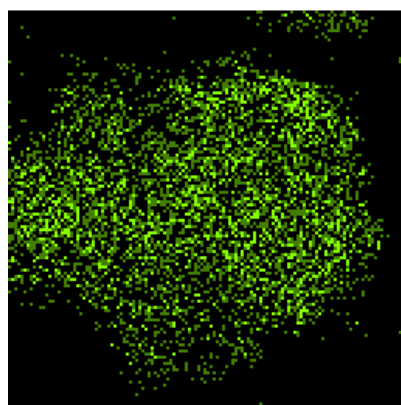

3µm Al Ka1

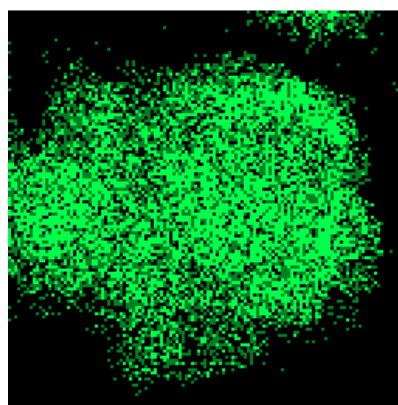

3µm Si Ka1

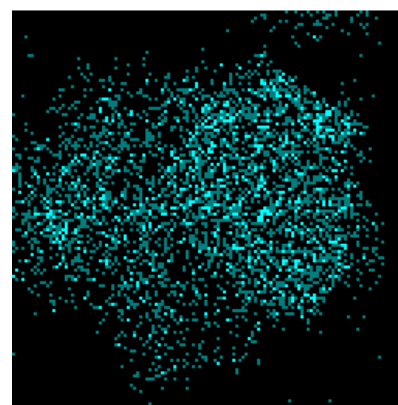

3µm K Ka1

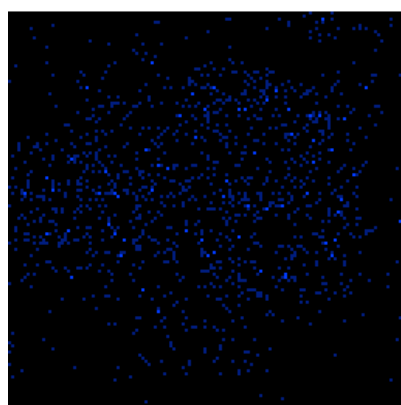

3µm Ca Ka1

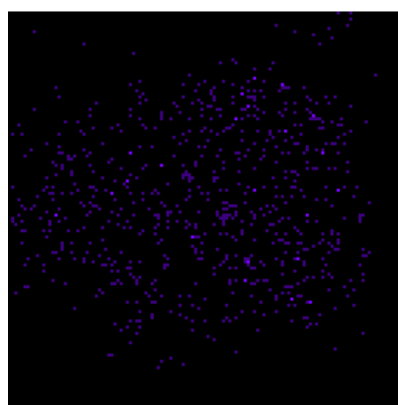

3µm Ti Ka1

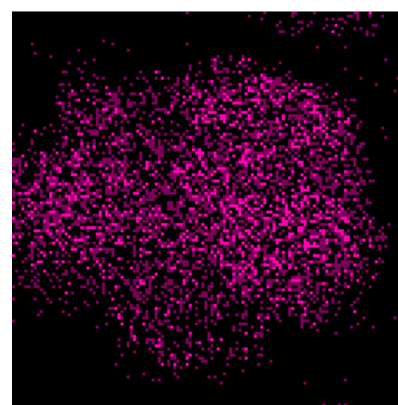

3µm Fe Ka1

Comment:

Project: Project 1

Owner: INCA

Sample: L4P-MW-ex

Type: Default

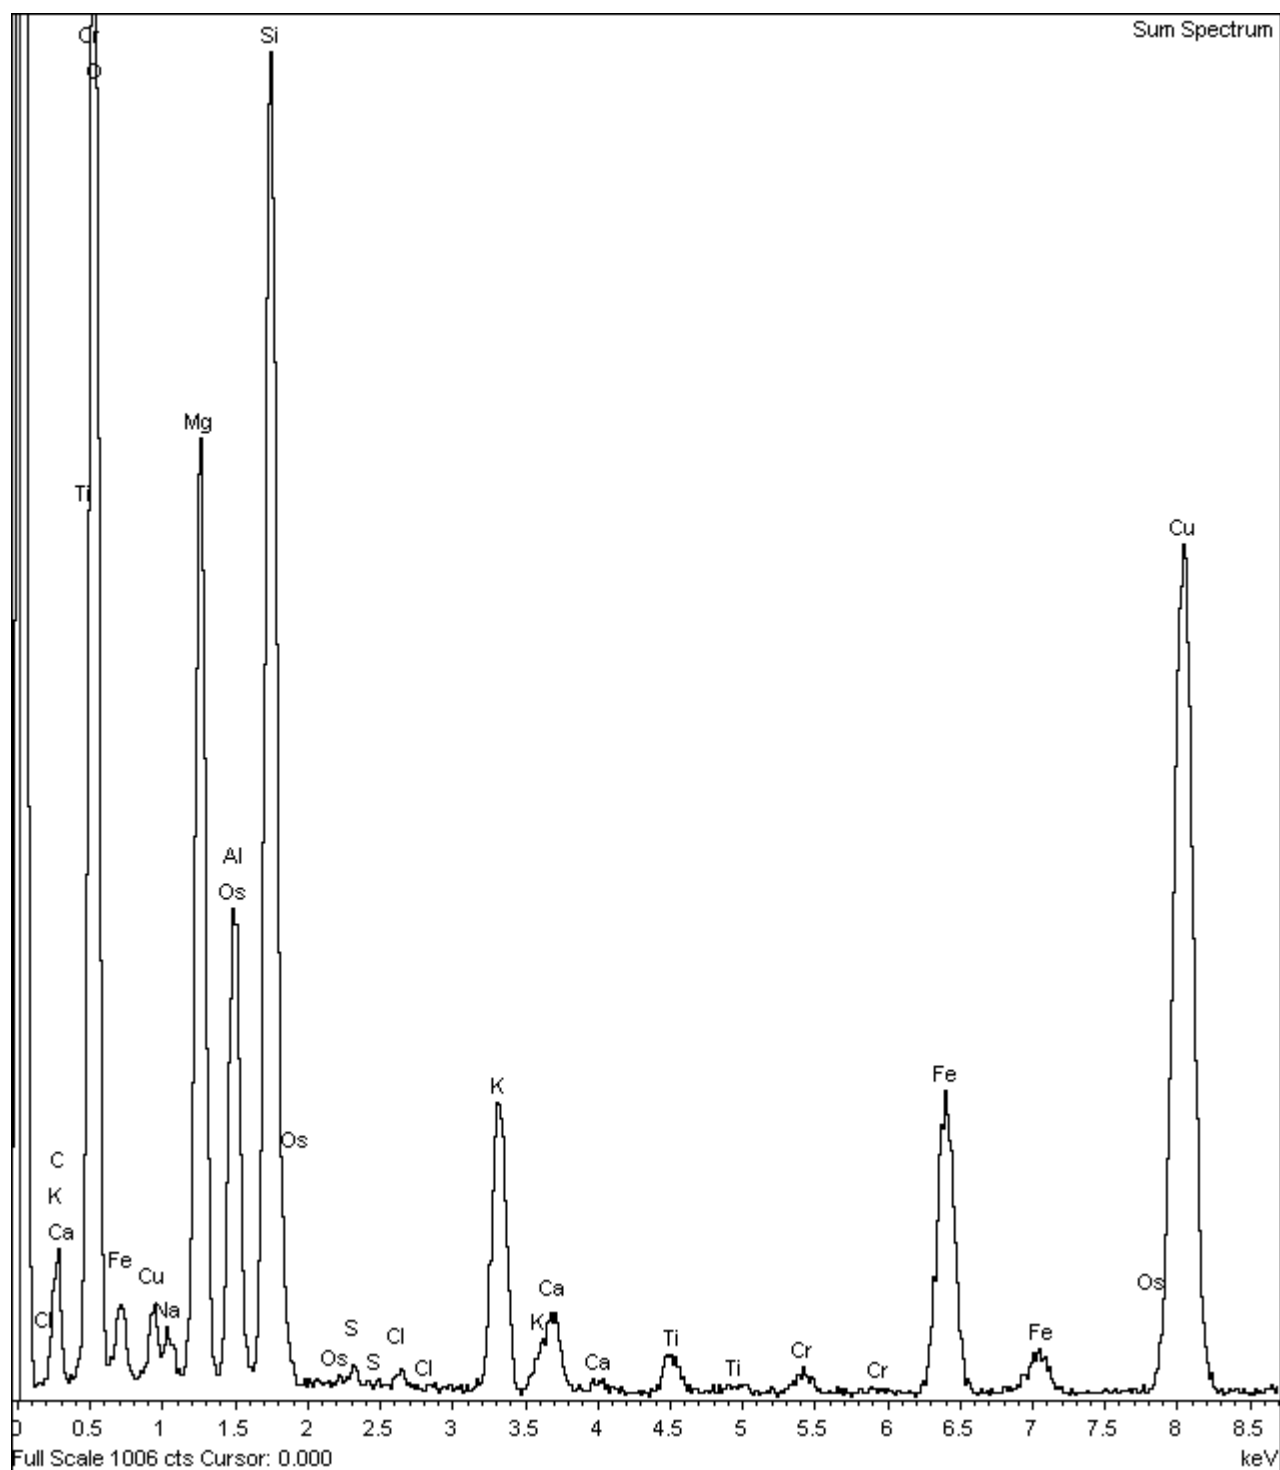

Comment:

| Element | Peak  | Area  | k      | Abs   | Weight% | Weight% | Atomic% |
|---------|-------|-------|--------|-------|---------|---------|---------|
|         | Area  | Sigma | factor | Corn. |         | Sigma   |         |
| O K     | 18090 | 246   | 1.065  | 1.000 | 39.67   | 0.38    | 55.58   |
| Mg K    | 11559 | 191   | 0.606  | 1.000 | 14.42   | 0.23    | 13.29   |
| Al K    | 5937  | 153   | 0.589  | 1.000 | 7.21    | 0.18    | 5.99    |
| Si K    | 17775 | 240   | 0.569  | 1.000 | 20.83   | 0.26    | 16.62   |
| K K     | 5361  | 135   | 0.552  | 1.000 | 6.09    | 0.15    | 3.49    |
| Ca K    | 1347  | 84    | 0.542  | 1.000 | 1.50    | 0.09    | 0.84    |
| Ti K    | 718   | 64    | 0.608  | 1.000 | 0.90    | 0.08    | 0.42    |
| Fe K    | 6719  | 142   | 0.678  | 1.000 | 9.38    | 0.19    | 3.76    |
| Totals  |       |       |        |       | 100.00  |         |         |

| Element | Peak | Area  | k      | Abs   | Weight% | Weight% | Atomic% |
|---------|------|-------|--------|-------|---------|---------|---------|
|         | Area | Sigma | factor | Corn. |         | Sigma   |         |
| O K     | 4393 | 121   | 1.065  | 1.000 | 38.57   | 0.76    | 54.45   |
| Mg K    | 2902 | 96    | 0.606  | 1.000 | 14.49   | 0.45    | 13.46   |
| Al K    | 1518 | 77    | 0.589  | 1.000 | 7.38    | 0.36    | 6.18    |
| Si K    | 4549 | 120   | 0.569  | 1.000 | 21.35   | 0.53    | 17.16   |
| K K     | 1374 | 67    | 0.552  | 1.000 | 6.25    | 0.30    | 3.61    |
| Ca K    | 320  | 41    | 0.542  | 1.000 | 1.43    | 0.18    | 0.81    |
| Ti K    | 213  | 32    | 0.608  | 1.000 | 1.07    | 0.16    | 0.50    |
| Fe K    | 1693 | 72    | 0.678  | 1.000 | 9.46    | 0.39    | 3.83    |
| Totals  |      |       |        |       | 100.00  |         |         |

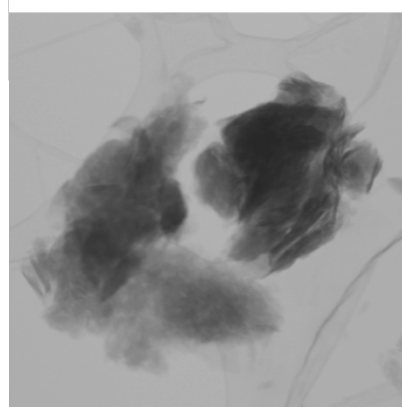

2µm Electron Image 1

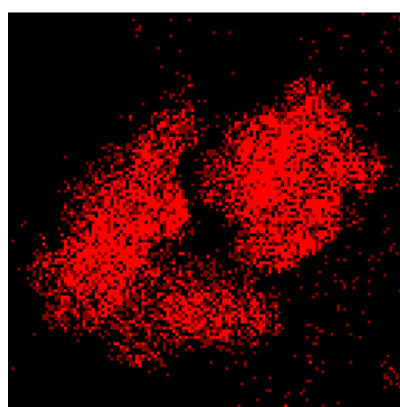

2µm O Ka1

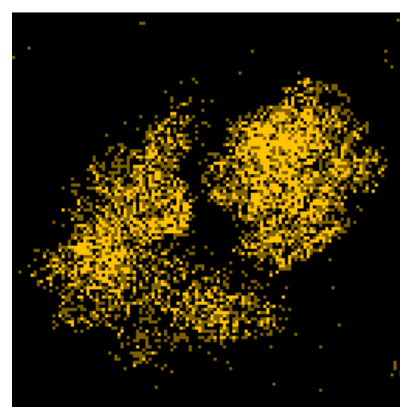

2µm Mg Ka1\_2

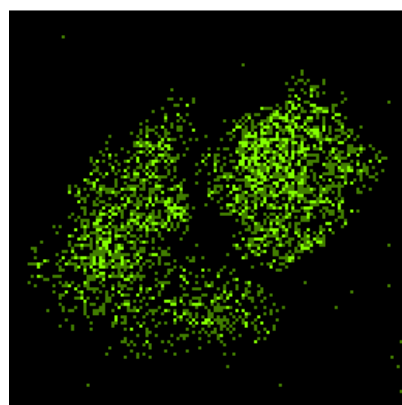

2µm Al Ka1

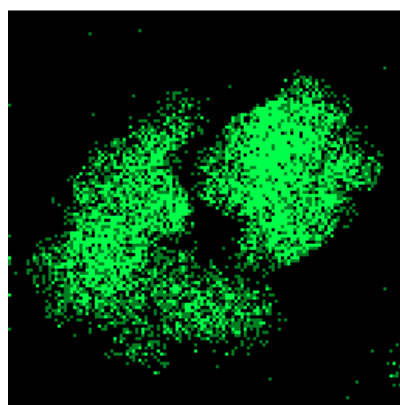

2µm Si Ka1

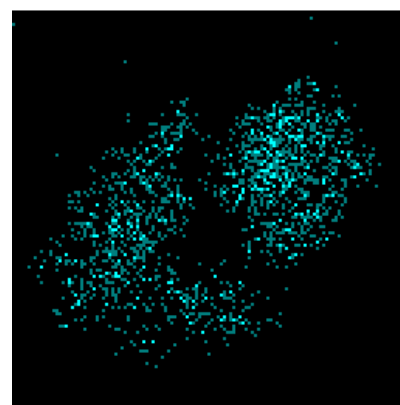

2µm K Ka1

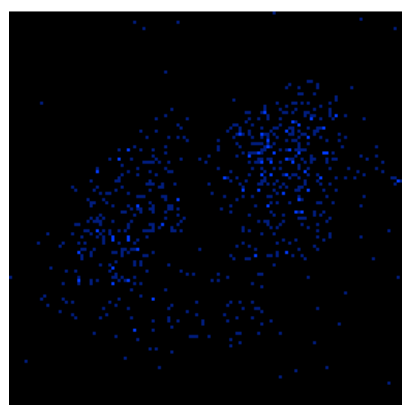

2µm Ca Ka1

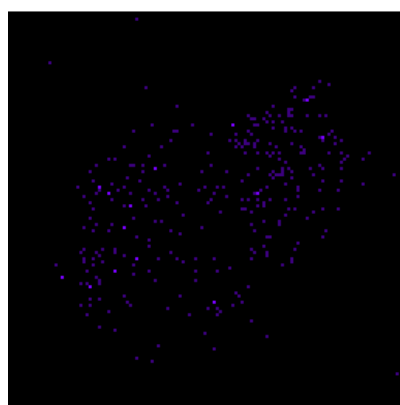

2µm Ti Ka1

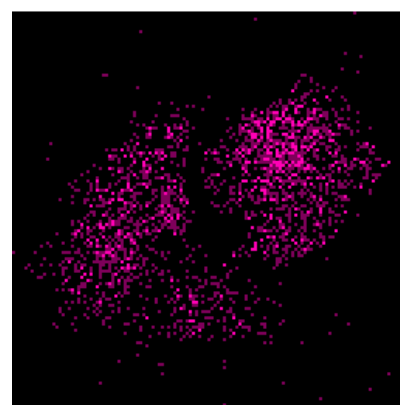

2µm Fe Ka1

Comment:



Project: Project 1

Owner: INCA

Sample: L4P-MW-ex

Type: Default

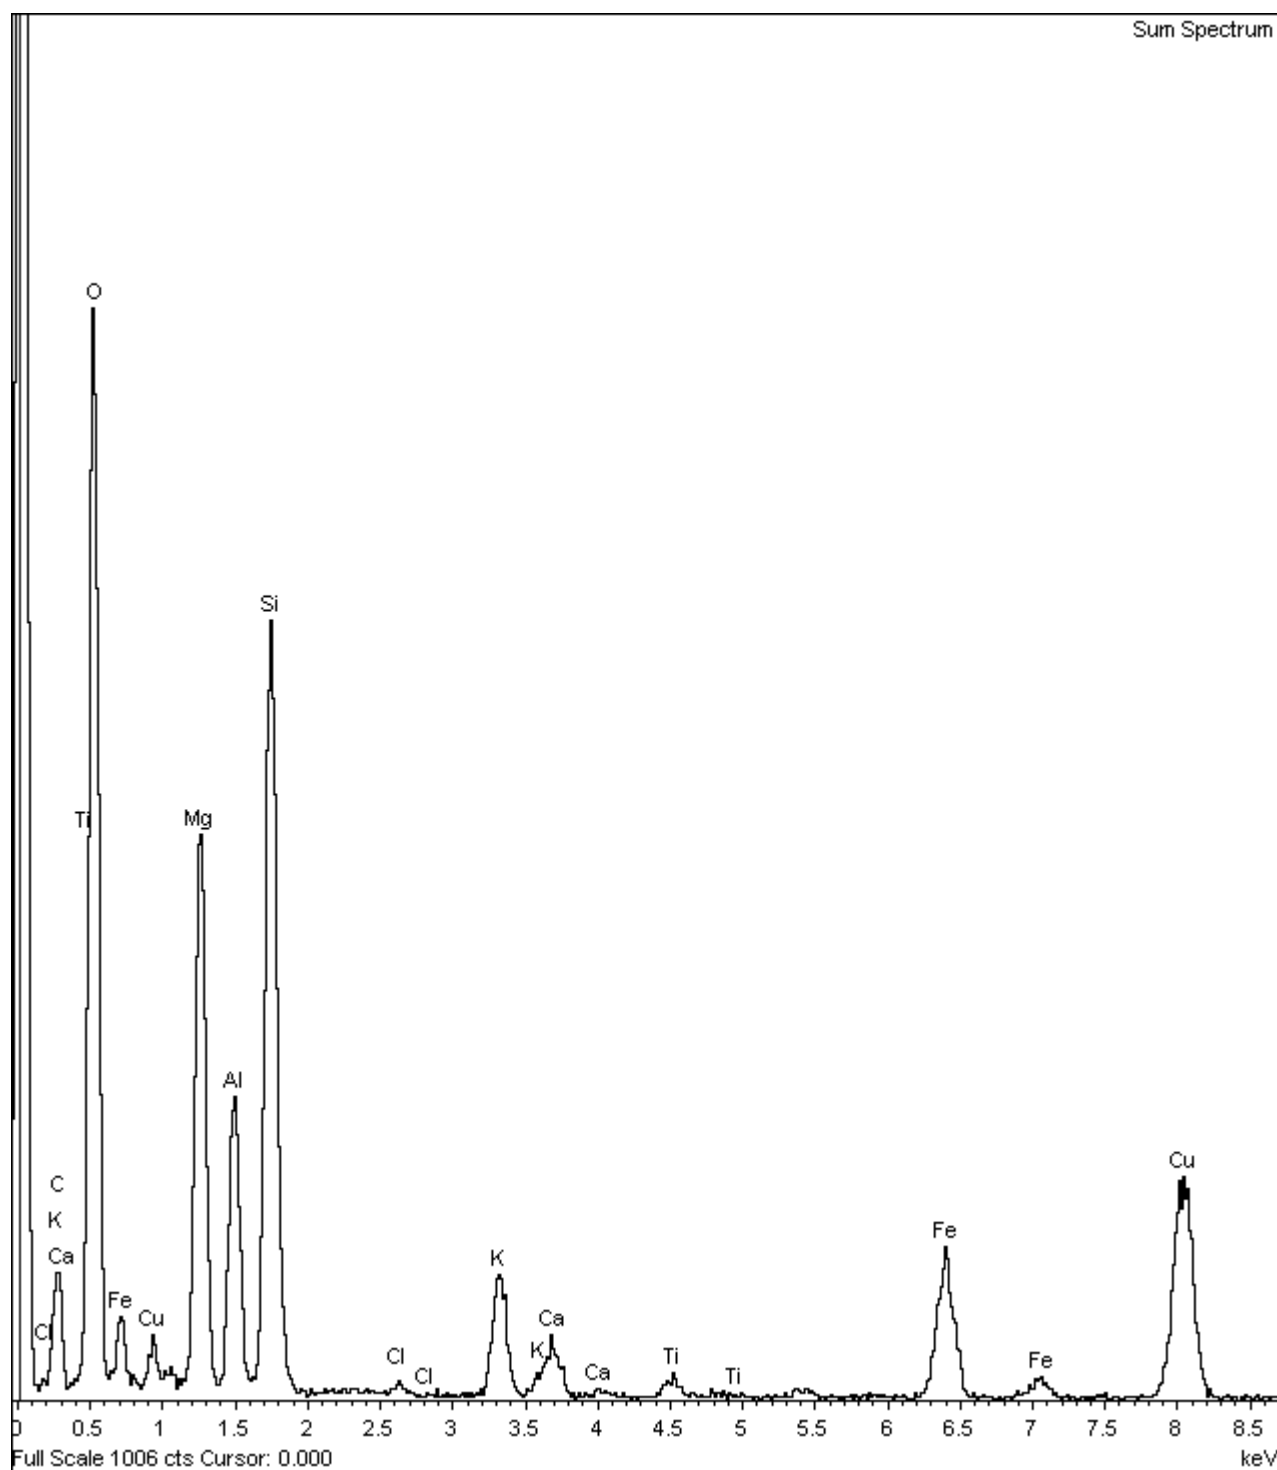

Comment:

| Element | Peak  | Area  | k      | Abs    | Weight% | Weight% | Atomic% |
|---------|-------|-------|--------|--------|---------|---------|---------|
|         | Area  | Sigma | factor | Corrn. |         | Sigma   |         |
| O K     | 11756 | 200   | 1.065  | 1.000  | 44.02   | 0.50    | 59.28   |
| Mg K    | 6800  | 148   | 0.606  | 1.000  | 14.48   | 0.30    | 12.83   |
| Al K    | 3589  | 118   | 0.589  | 1.000  | 7.44    | 0.24    | 5.94    |
| Si K    | 10247 | 181   | 0.569  | 1.000  | 20.50   | 0.34    | 15.73   |
| K K     | 2291  | 88    | 0.552  | 1.000  | 4.45    | 0.17    | 2.45    |
| Ca K    | 765   | 62    | 0.542  | 1.000  | 1.46    | 0.12    | 0.78    |
| Ti K    | 268   | 43    | 0.608  | 1.000  | 0.57    | 0.09    | 0.26    |
| Fe K    | 2970  | 95    | 0.678  | 1.000  | 7.08    | 0.22    | 2.73    |
| Totals  |       |       |        |        | 100.00  |         |         |

| Element | Peak | Area  | k      | Abs    | Weight% | Weight% | Atomic% |
|---------|------|-------|--------|--------|---------|---------|---------|
|         | Area | Sigma | factor | Corrn. |         | Sigma   |         |
| O K     | 2628 | 94    | 1.065  | 1.000  | 43.48   | 1.05    | 58.68   |
| Mg K    | 1578 | 71    | 0.606  | 1.000  | 14.85   | 0.63    | 13.19   |
| Al K    | 837  | 56    | 0.589  | 1.000  | 7.67    | 0.50    | 6.14    |
| Si K    | 2338 | 86    | 0.569  | 1.000  | 20.68   | 0.72    | 15.90   |
| K K     | 477  | 40    | 0.552  | 1.000  | 4.09    | 0.34    | 2.26    |
| Ca K    | 171  | 28    | 0.542  | 1.000  | 1.44    | 0.23    | 0.77    |
| Ti K    | 82   | 20    | 0.608  | 1.000  | 0.78    | 0.18    | 0.35    |
| Fe K    | 666  | 46    | 0.678  | 1.000  | 7.01    | 0.47    | 2.71    |
| Totals  |      |       |        |        | 100.00  |         |         |

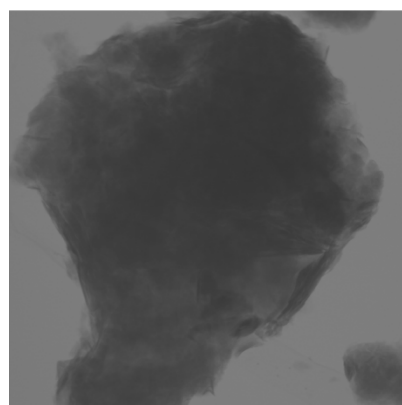

3µm

Electron Image 1

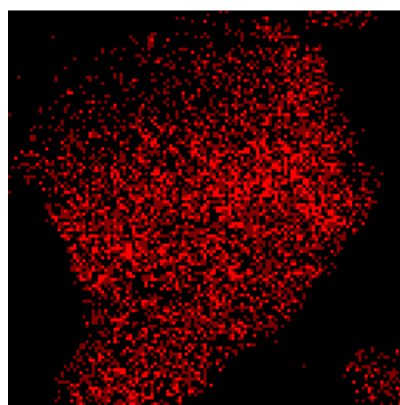

3µm

Al Ka1

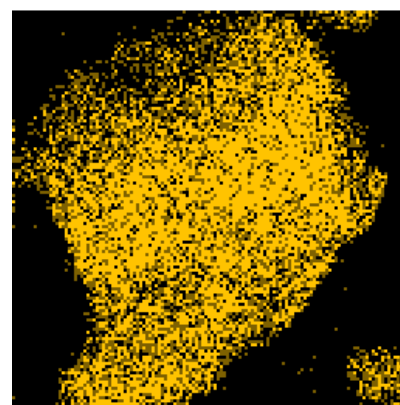

3µm

Si Ka1

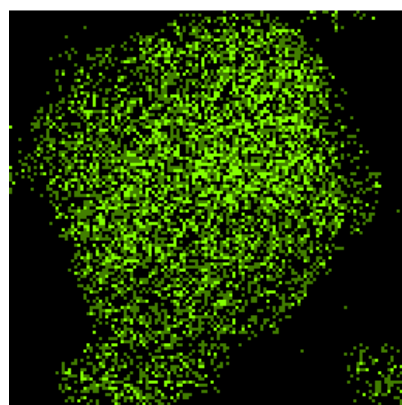

3µm

Fe Ka1

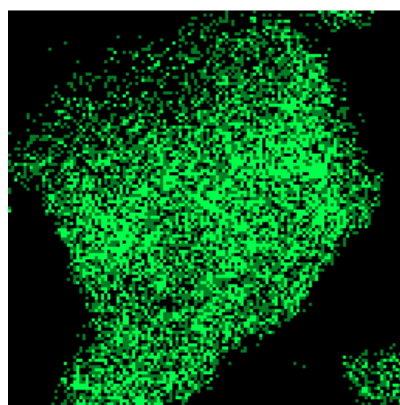

3µm

Mg Ka1\_2

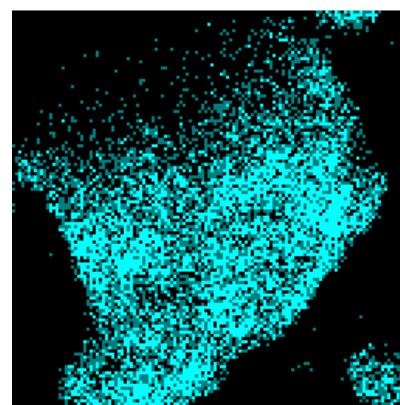

3µm

O Ka1

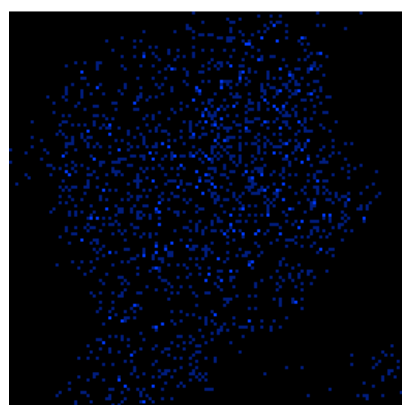

3µm

Ca Ka1

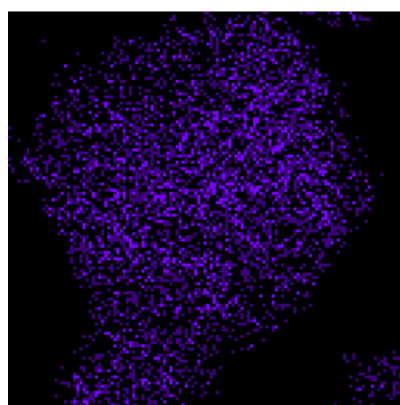

3µm

K Ka1

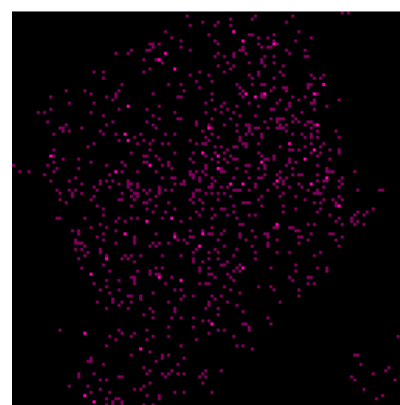

3µm

Ti Ka1

Comment:

Project: Project 1

Owner: INCA

Sample: L4P-MW-ex

Type: Default

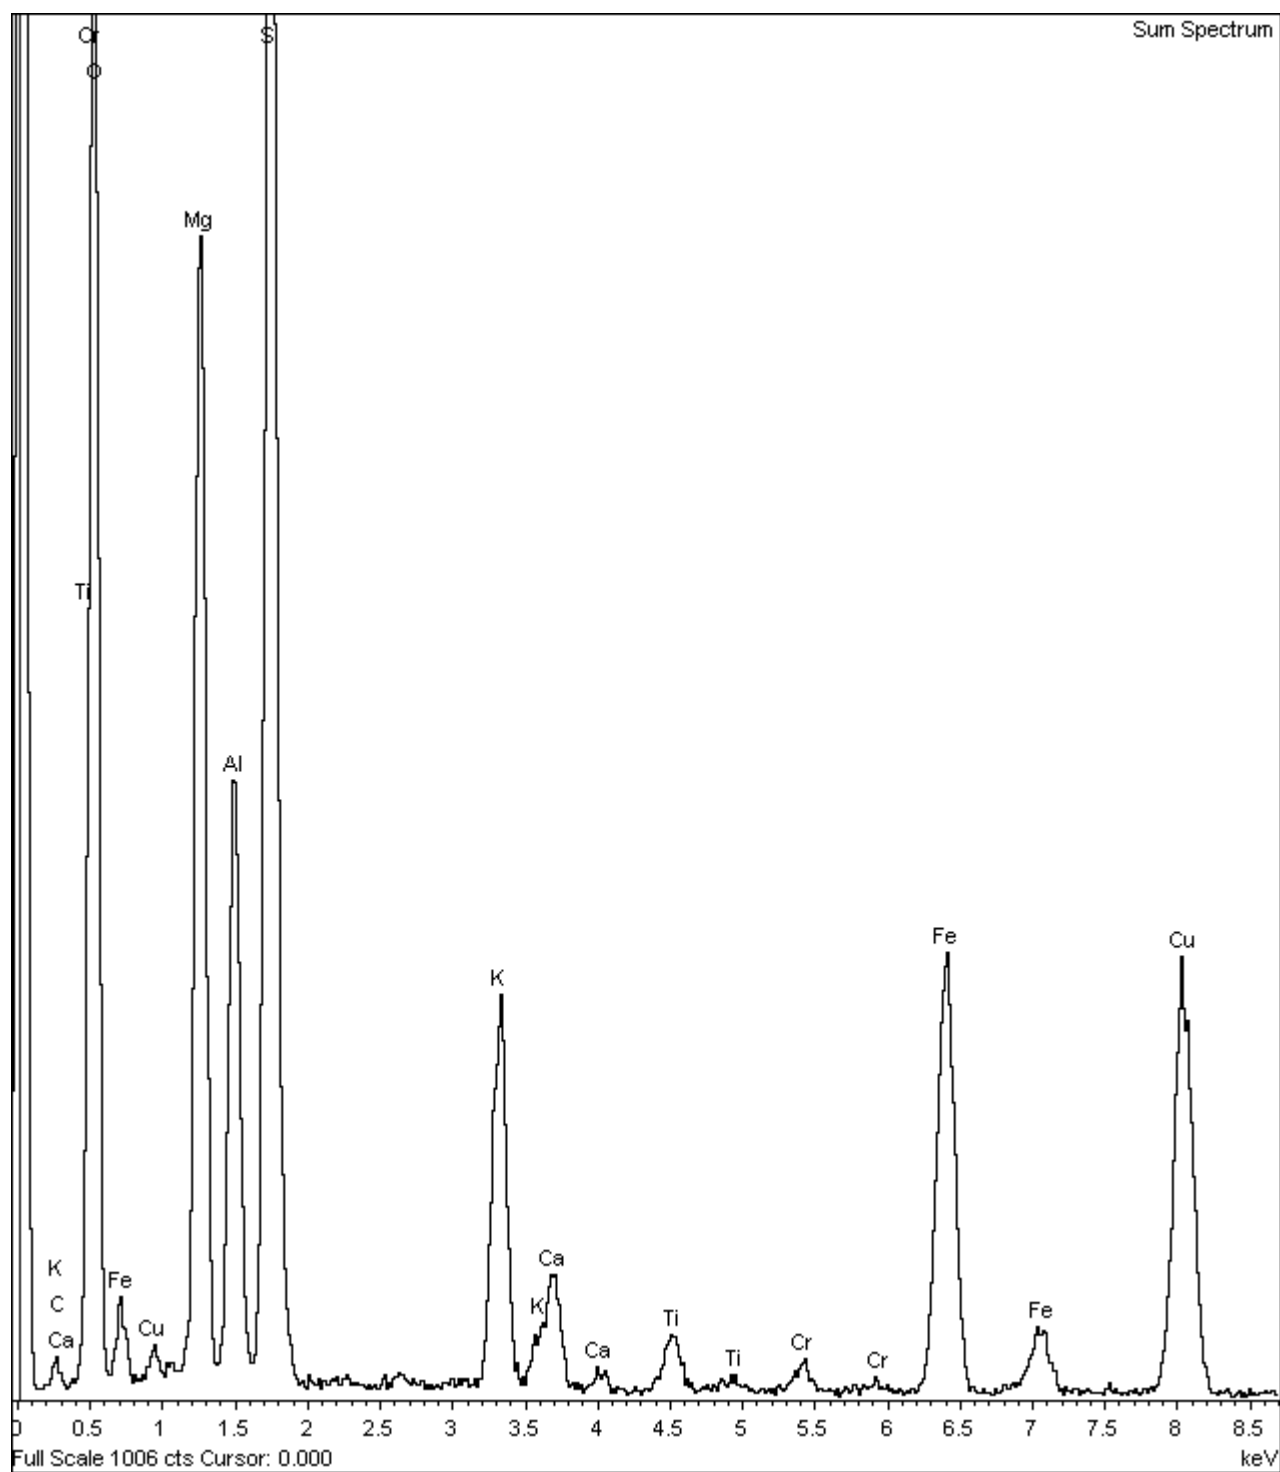

Comment:

Project: Project 1

Owner: INCA

Sample: L4P-MW-ex

Type: Default

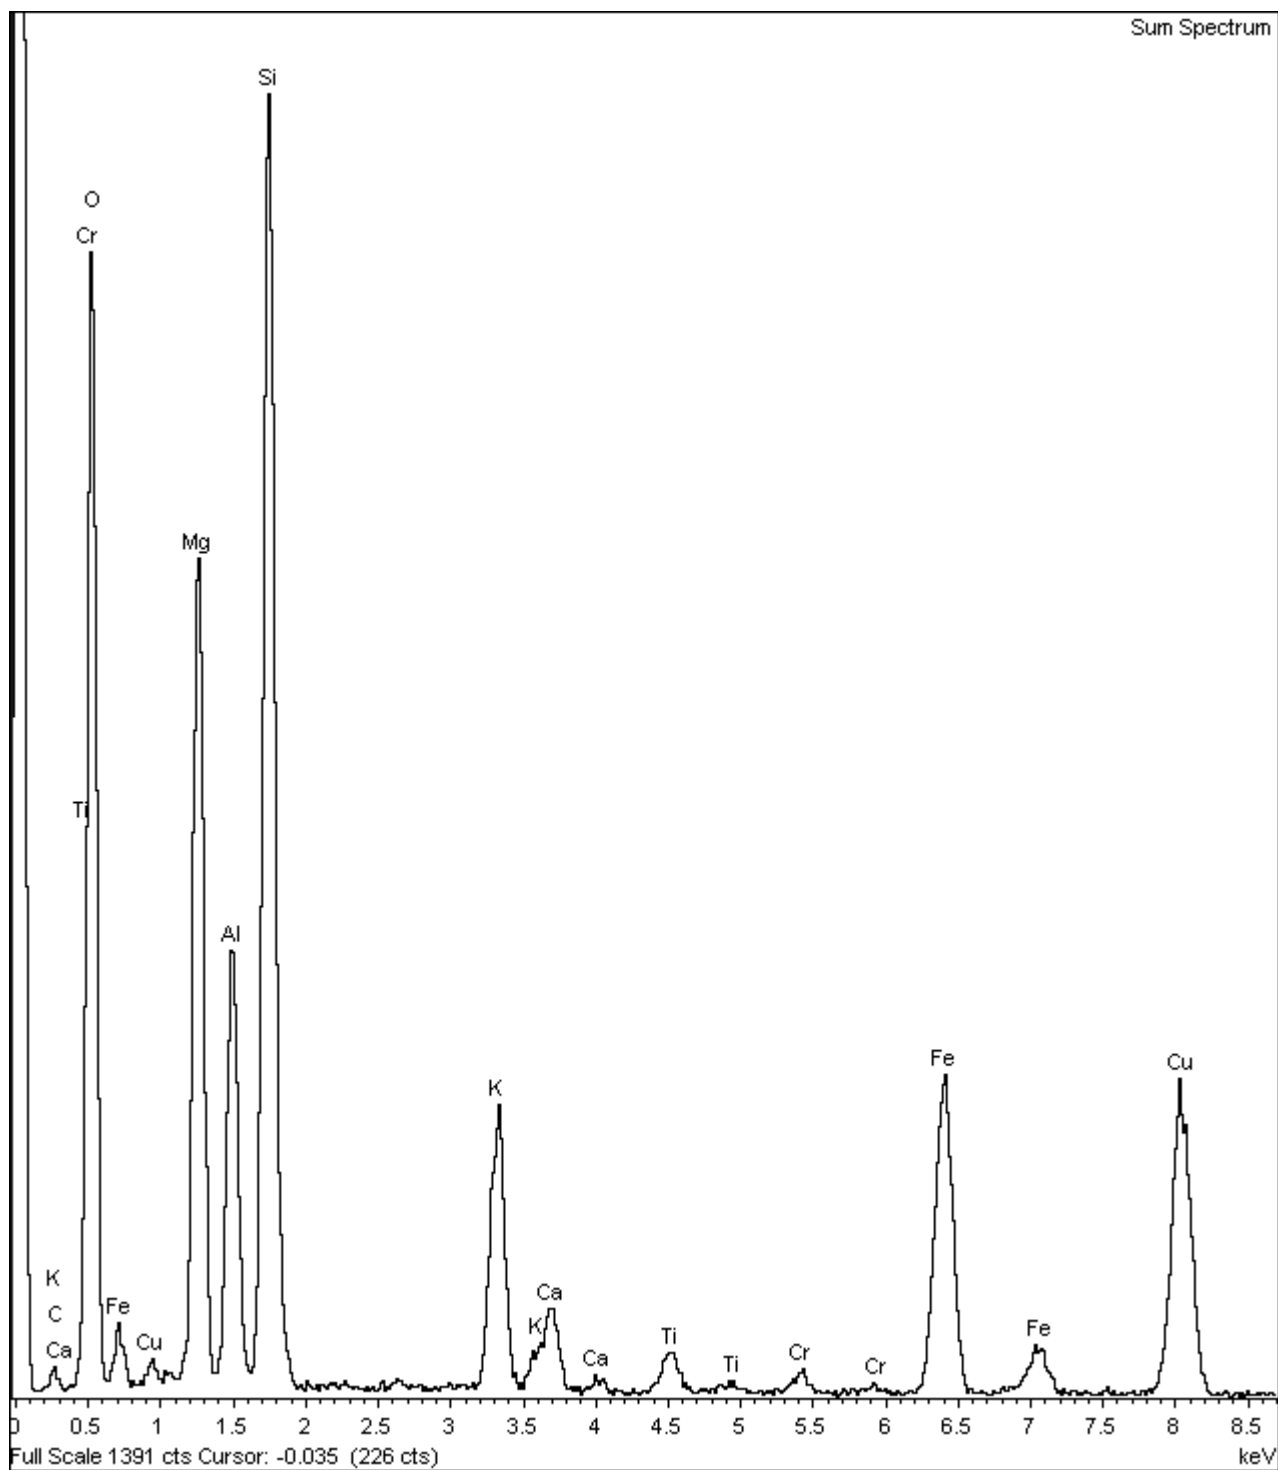

Comment:

| Element | Peak  | Area  | k      | Abs    | Weight% | Weight% | Atomic% |
|---------|-------|-------|--------|--------|---------|---------|---------|
|         | Area  | Sigma | factor | Corrn. |         | Sigma   |         |
| O K     | 16302 | 233   | 1.065  | 1.000  | 31.08   | 0.34    | 46.56   |
| Mg K    | 13961 | 212   | 0.606  | 1.000  | 15.13   | 0.22    | 14.92   |
| Al K    | 7388  | 172   | 0.589  | 1.000  | 7.80    | 0.17    | 6.93    |
| Si K    | 23585 | 273   | 0.569  | 1.000  | 24.03   | 0.26    | 20.51   |
| K K     | 6884  | 156   | 0.552  | 1.000  | 6.80    | 0.15    | 4.17    |
| Ca K    | 1982  | 98    | 0.542  | 1.000  | 1.92    | 0.09    | 1.15    |
| Ti K    | 1066  | 75    | 0.608  | 1.000  | 1.16    | 0.08    | 0.58    |
| Fe K    | 9961  | 170   | 0.678  | 1.000  | 12.08   | 0.20    | 5.19    |
| Totals  |       |       |        |        | 100.00  |         |         |

| Element | Peak | Area  | k      | Abs    | Weight% | Weight% | Atomic% |
|---------|------|-------|--------|--------|---------|---------|---------|
|         | Area | Sigma | factor | Corrn. |         | Sigma   |         |
| O K     | 3242 | 101   | 1.065  | 1.000  | 30.85   | 0.75    | 46.41   |
| Mg K    | 2729 | 93    | 0.606  | 1.000  | 14.77   | 0.47    | 14.62   |
| Al K    | 1491 | 77    | 0.589  | 1.000  | 7.86    | 0.39    | 7.01    |
| Si K    | 4691 | 121   | 0.569  | 1.000  | 23.86   | 0.56    | 20.44   |
| K K     | 1467 | 69    | 0.552  | 1.000  | 7.23    | 0.33    | 4.45    |
| Ca K    | 392  | 45    | 0.542  | 1.000  | 1.90    | 0.21    | 1.14    |
| Ti K    | 244  | 33    | 0.608  | 1.000  | 1.32    | 0.18    | 0.67    |
| Fe K    | 2016 | 76    | 0.678  | 1.000  | 12.21   | 0.44    | 5.26    |
| Totals  |      |       |        |        | 100.00  |         |         |

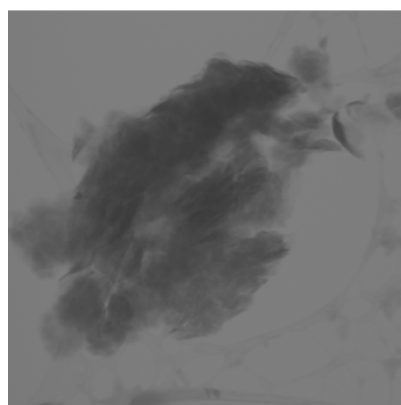

3µm Electron Image 1

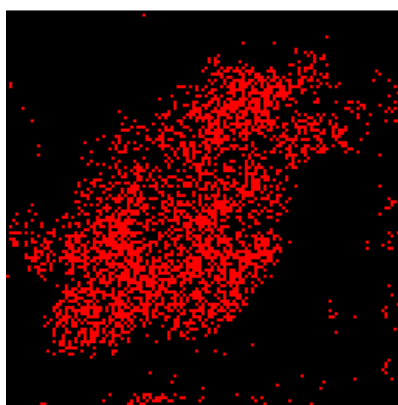

3µm O Ka1

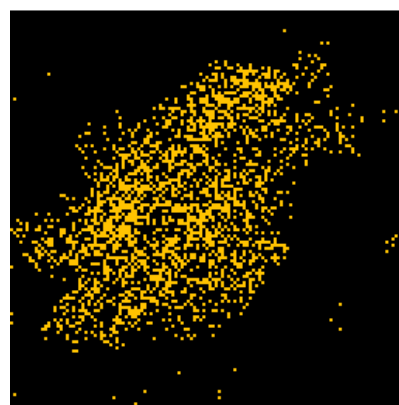

3µm Mg Ka1\_2

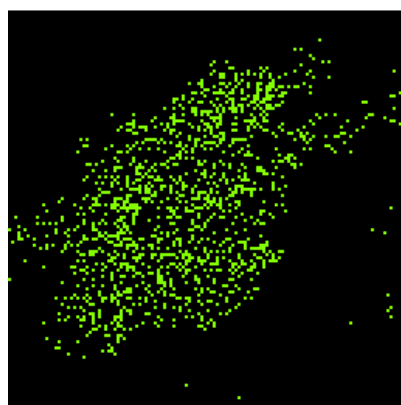

3µm Al Ka1

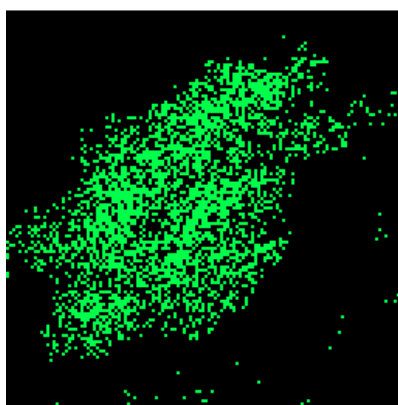

3µm Si Ka1

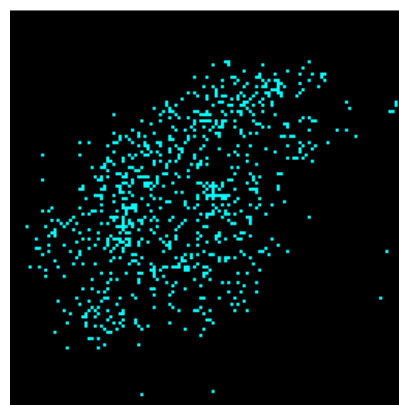

3µm K Ka1

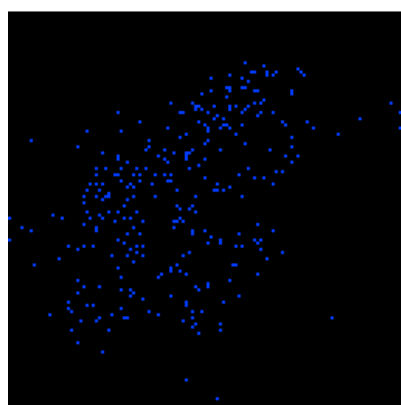

3µm Ca Ka1

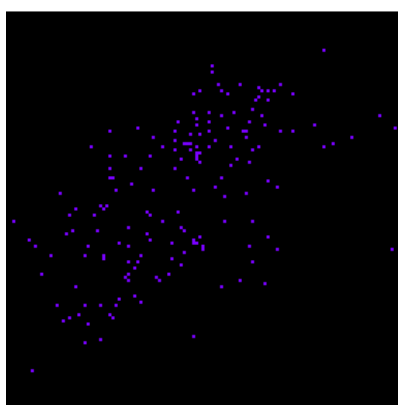

3µm Ti Ka1

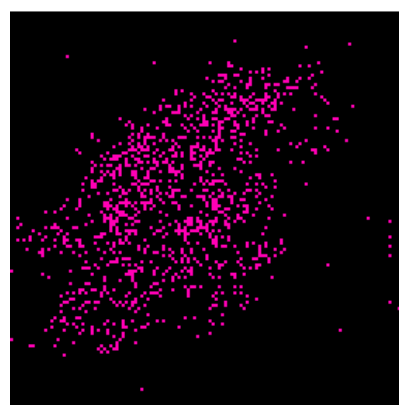

3µm Fe Ka1

Comment:

Inca

Inca

Project: Project 1

Owner: INCA

Sample: L4P-MW-ex

Type: Default

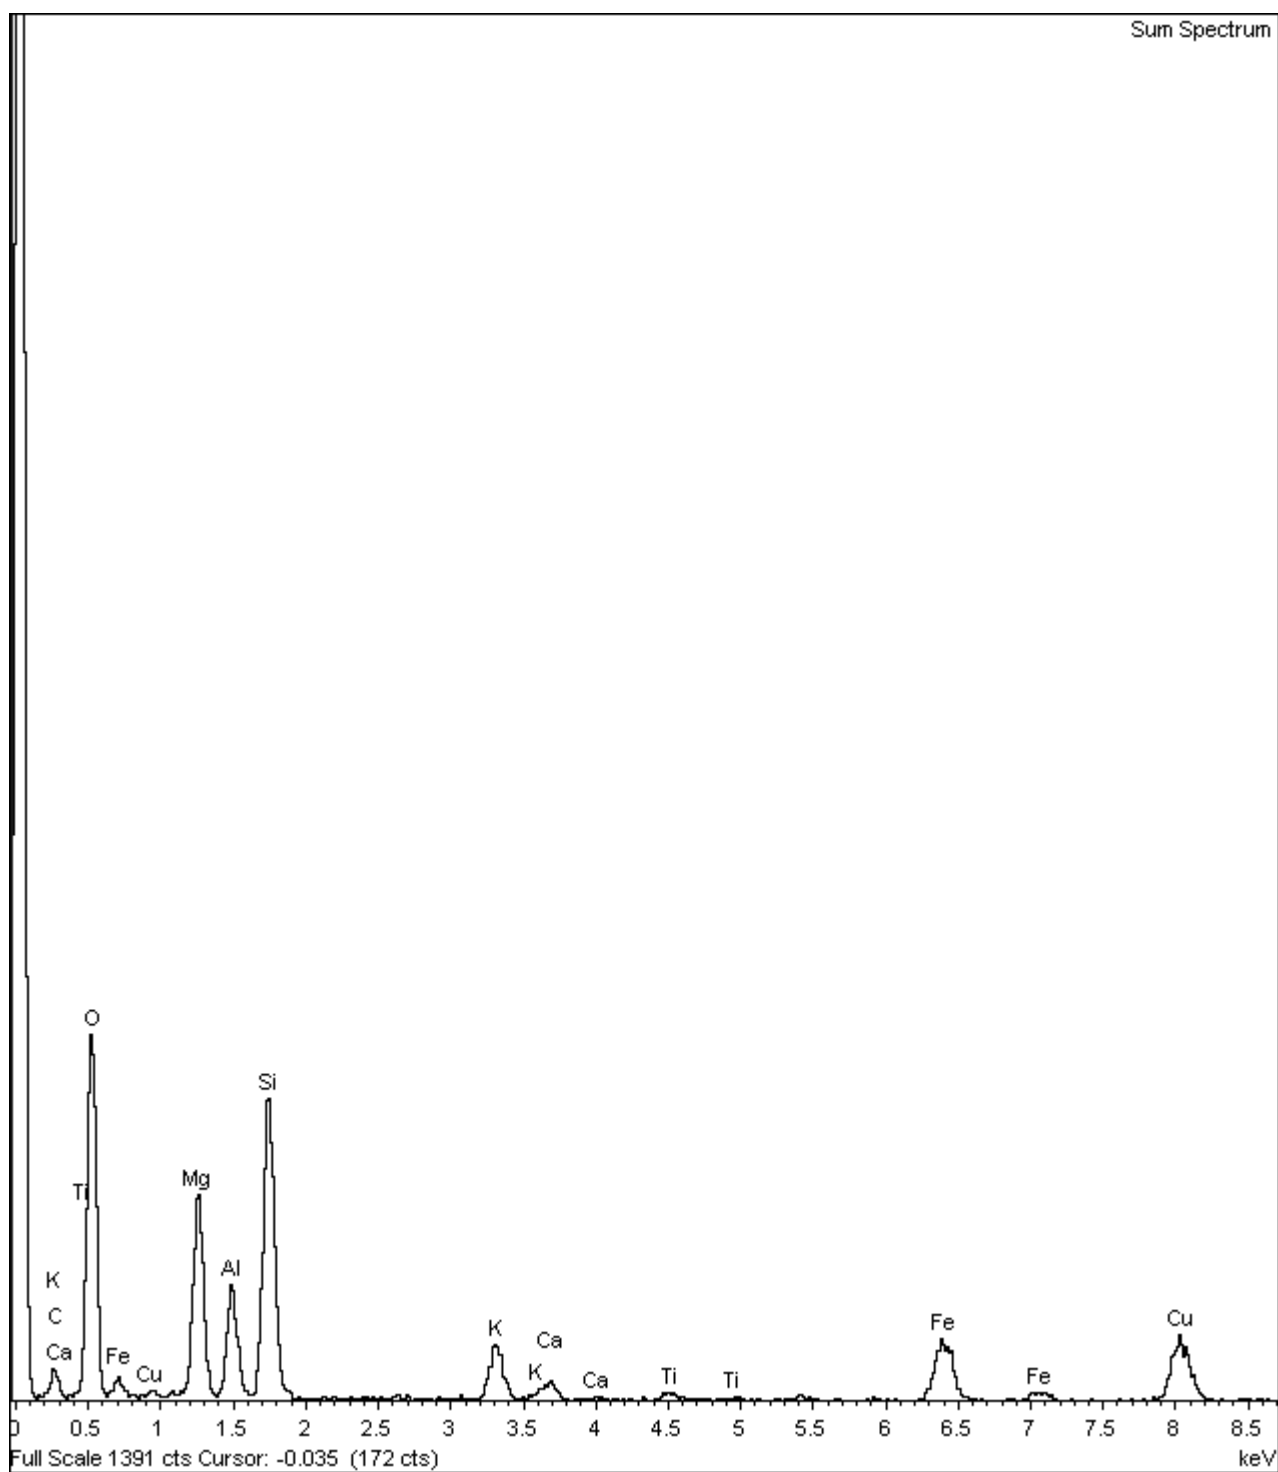

Comment:



| Element | Peak | Area  | k      | Abs    | Weight% | Weight% | Atomic% |
|---------|------|-------|--------|--------|---------|---------|---------|
|         | Area | Sigma | factor | Cornn. |         | Sigma   |         |
| O K     | 5441 | 134   | 1.065  | 1.000  | 40.87   | 0.70    | 56.55   |
| Mg K    | 3299 | 104   | 0.606  | 1.000  | 14.09   | 0.42    | 12.83   |
| Al K    | 1802 | 83    | 0.589  | 1.000  | 7.49    | 0.33    | 6.15    |
| Si K    | 5396 | 130   | 0.569  | 1.000  | 21.66   | 0.49    | 17.07   |
| K K     | 1263 | 67    | 0.552  | 1.000  | 4.92    | 0.26    | 2.78    |
| Ca K    | 370  | 42    | 0.542  | 1.000  | 1.41    | 0.16    | 0.78    |
| Ti K    | 200  | 33    | 0.608  | 1.000  | 0.86    | 0.14    | 0.40    |
| Fe K    | 1820 | 73    | 0.678  | 1.000  | 8.70    | 0.34    | 3.45    |
| Totals  |      |       |        |        | 100.00  |         |         |

| Element | Peak | Area  | k      | Abs    | Weight% | Weight% | Atomic% |
|---------|------|-------|--------|--------|---------|---------|---------|
|         | Area | Sigma | factor | Cornn. |         | Sigma   |         |
| O K     | 1295 | 63    | 1.065  | 1.000  | 39.09   | 1.36    | 54.56   |
| Mg K    | 895  | 53    | 0.606  | 1.000  | 15.36   | 0.85    | 14.11   |
| Al K    | 479  | 43    | 0.589  | 1.000  | 8.00    | 0.69    | 6.62    |
| Si K    | 1343 | 64    | 0.569  | 1.000  | 21.65   | 0.97    | 17.22   |
| K K     | 344  | 34    | 0.552  | 1.000  | 5.38    | 0.52    | 3.07    |
| Ca K    | 85   | 22    | 0.542  | 1.000  | 1.31    | 0.33    | 0.73    |
| Fe K    | 480  | 37    | 0.678  | 1.000  | 9.21    | 0.68    | 3.68    |
| Totals  |      |       |        |        | 100.00  |         |         |

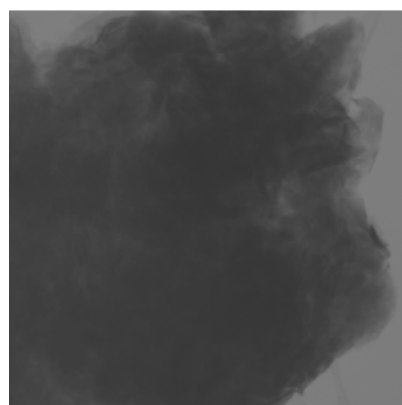

3µm

Electron Image 1

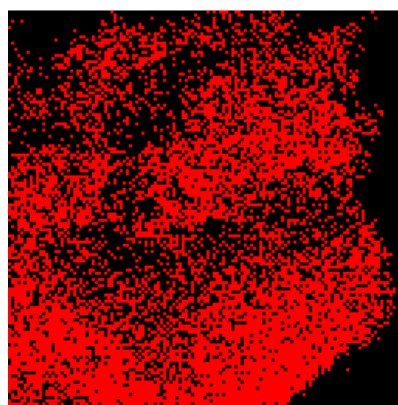

3µm

O Ka1

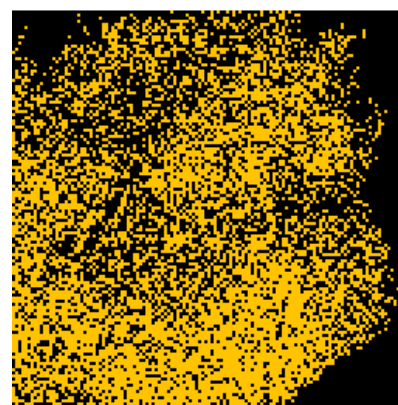

3µm

Mg Ka1\_2

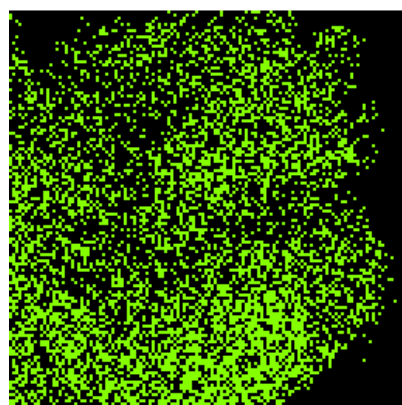

3µm

Al Ka1

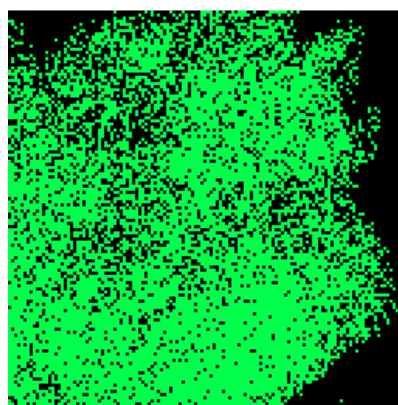

3µm

Si Ka1

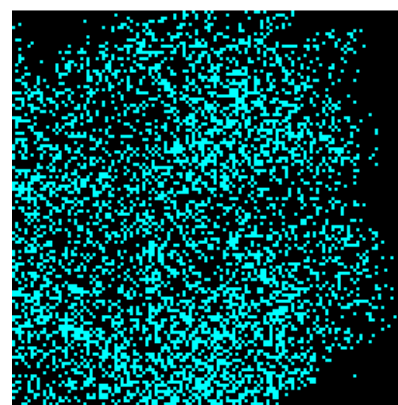

3µm

K Ka1

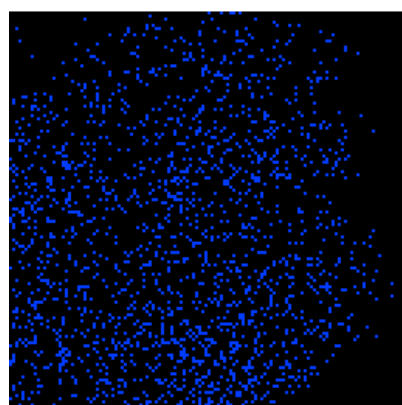

3µm

Ca Ka1

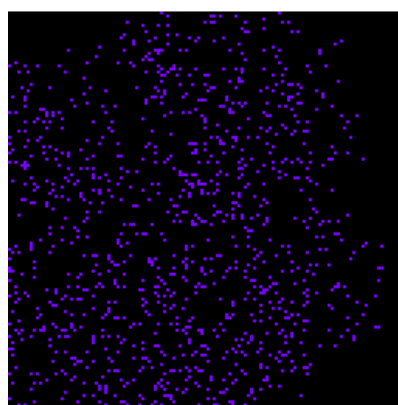

3µm

Ti Ka1

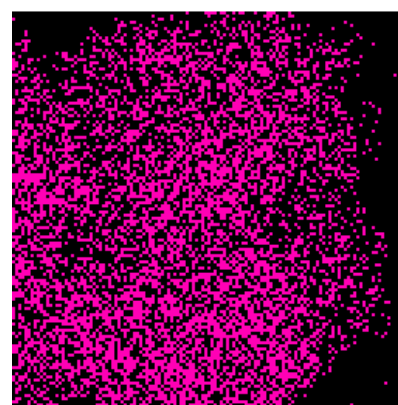

3µm

Fe Ka1

Comment:

Inca

Inca

Project: Project 1

Owner: INCA

Sample: L4P-MW-ex

Type: Default

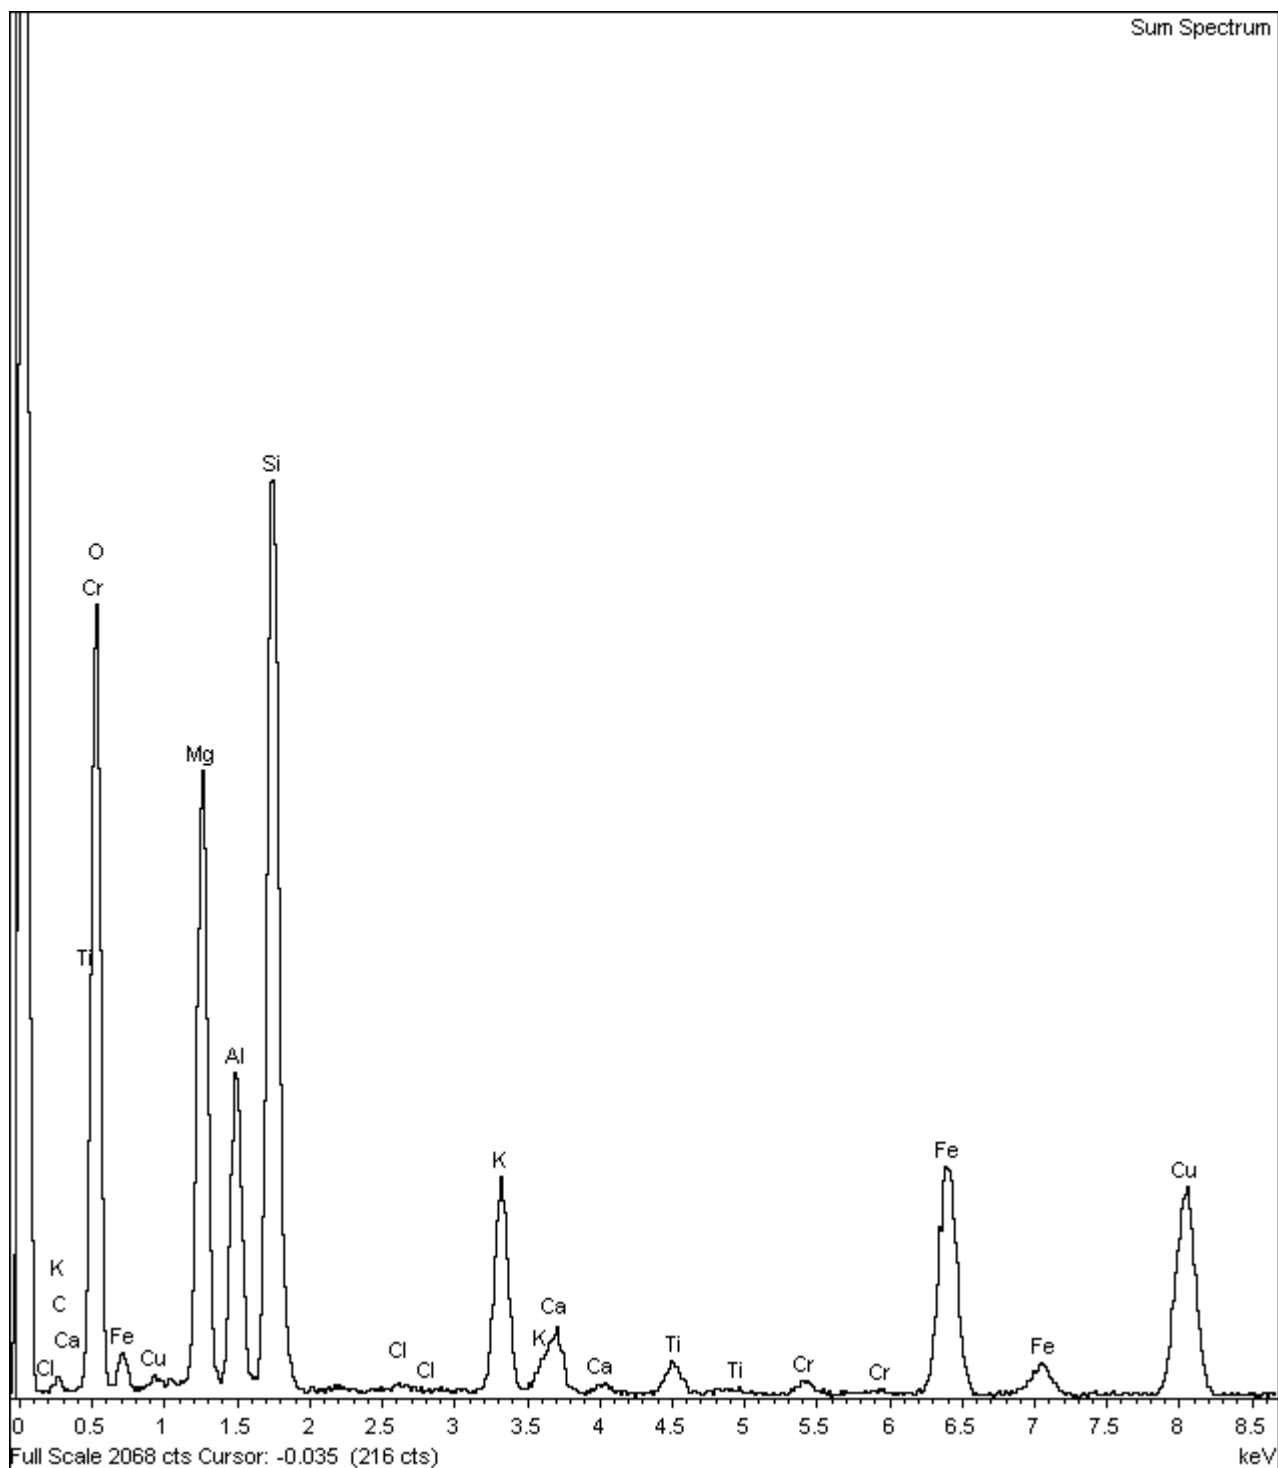

Comment:

| Element | Peak  | Area  | k      | Abs    | Weight% | Weight% | Atomic% |
|---------|-------|-------|--------|--------|---------|---------|---------|
|         | Area  | Sigma | factor | Corrn. |         | Sigma   |         |
| C K     | -93   | 128   | 1.425  | 1.000  | -0.22   | 0.30    | -0.44   |
| O K     | 17156 | 241   | 1.065  | 1.000  | 30.48   | 0.34    | 46.11   |
| Mg K    | 14813 | 217   | 0.606  | 1.000  | 14.97   | 0.21    | 14.90   |
| Al K    | 7790  | 177   | 0.589  | 1.000  | 7.66    | 0.17    | 6.87    |
| Si K    | 25603 | 284   | 0.569  | 1.000  | 24.31   | 0.26    | 20.95   |
| K K     | 7741  | 161   | 0.552  | 1.000  | 7.13    | 0.15    | 4.41    |
| Ca K    | 2144  | 105   | 0.542  | 1.000  | 1.94    | 0.09    | 1.17    |
| Ti K    | 1138  | 79    | 0.608  | 1.000  | 1.16    | 0.08    | 0.58    |
| Fe K    | 11130 | 179   | 0.678  | 1.000  | 12.58   | 0.20    | 5.45    |
| Totals  |       |       |        |        | 100.00  |         |         |

| Element | Peak | Area  | k      | Abs    | Weight% | Weight% | Atomic% |
|---------|------|-------|--------|--------|---------|---------|---------|
|         | Area | Sigma | factor | Corrn. |         | Sigma   |         |
| O K     | 3214 | 102   | 1.065  | 1.000  | 30.26   | 0.74    | 45.81   |
| Mg K    | 2730 | 93    | 0.606  | 1.000  | 14.62   | 0.47    | 14.56   |
| Al K    | 1529 | 77    | 0.589  | 1.000  | 7.97    | 0.38    | 7.15    |
| Si K    | 4782 | 121   | 0.569  | 1.000  | 24.06   | 0.56    | 20.75   |
| K K     | 1447 | 68    | 0.552  | 1.000  | 7.06    | 0.32    | 4.37    |
| Ca K    | 364  | 45    | 0.542  | 1.000  | 1.74    | 0.21    | 1.05    |
| Ti K    | 260  | 35    | 0.608  | 1.000  | 1.40    | 0.19    | 0.71    |
| Fe K    | 2152 | 80    | 0.678  | 1.000  | 12.90   | 0.45    | 5.59    |
| Totals  |      |       |        |        | 100.00  |         |         |
