# Supplementary material for: Heterogeneous Distribution of Interlayer Cations and Iron as a Plausible Explanation of the Non-Exfoliation of Commercial Vermiculites Post Alcohol Treatment and Microwave Irradiation
Source: MDPI journal article supplement (doi:10.3390/min11080835), 2021-08-01
Supplement: s1 [file s1]

LME

Project: Project 1

Owner: INCA

Sample: L4M-MW-Ex

Type: Default

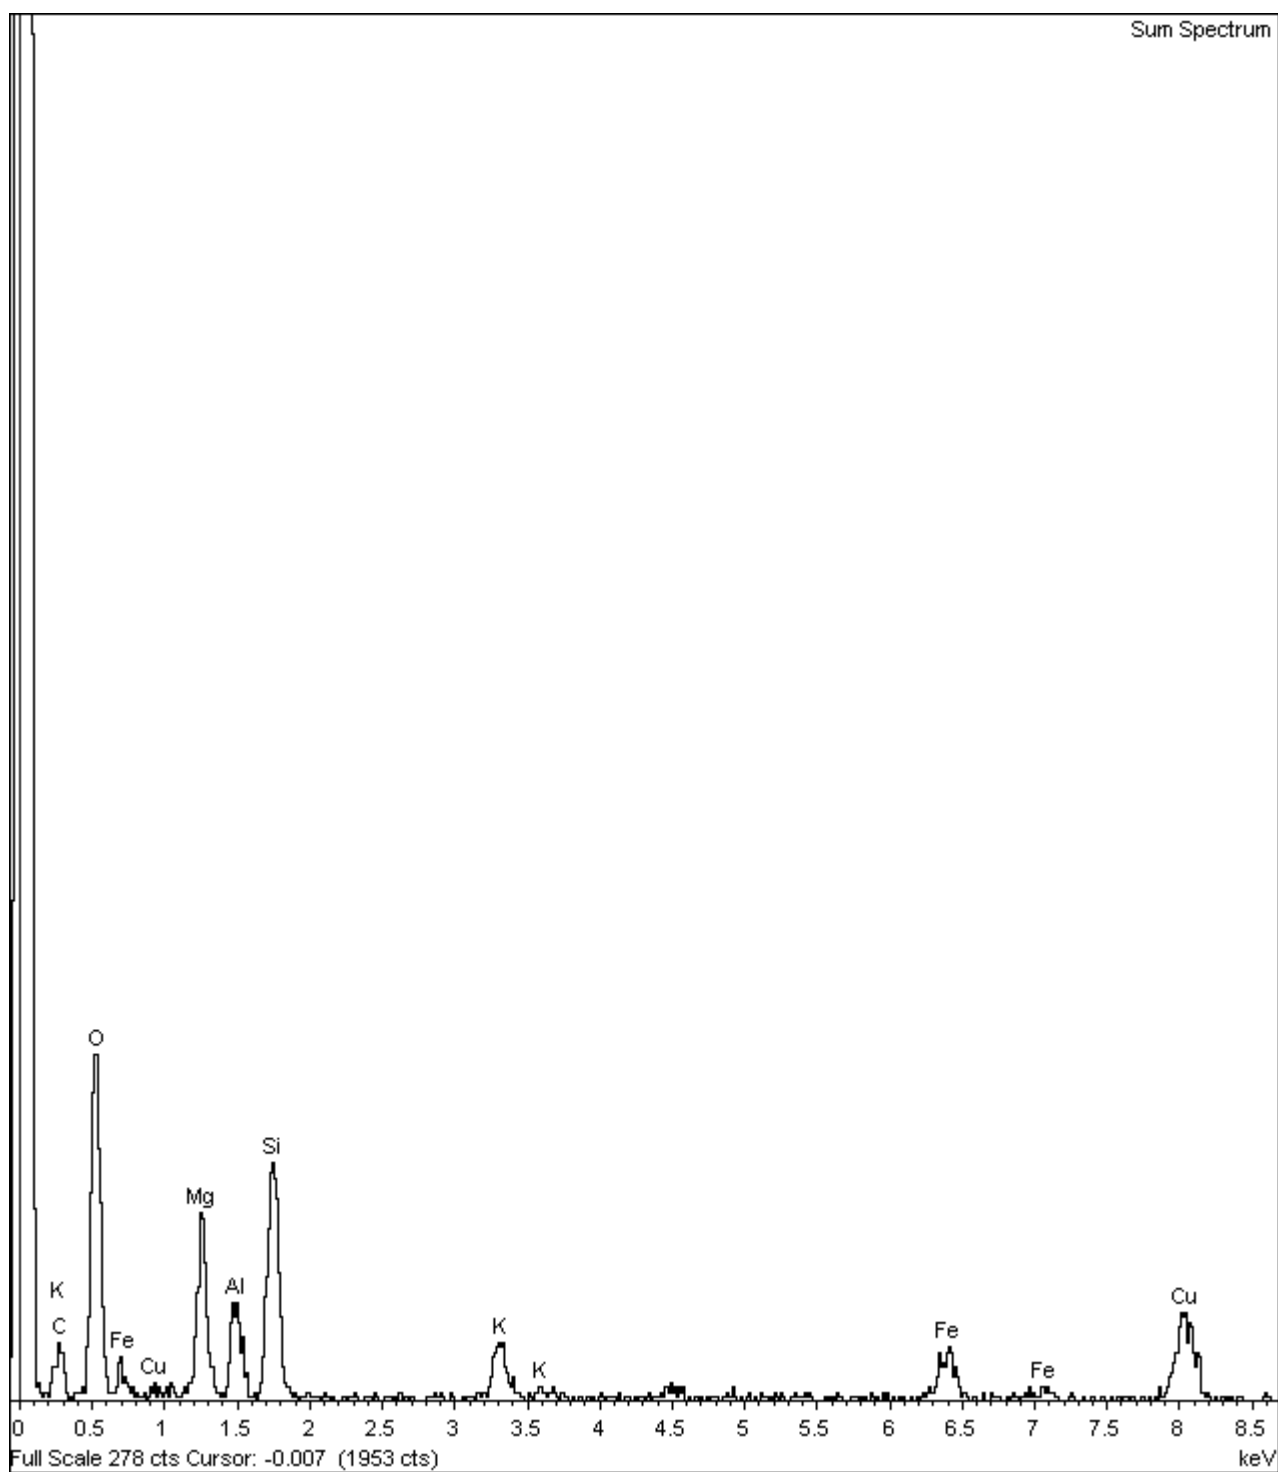

Comment:

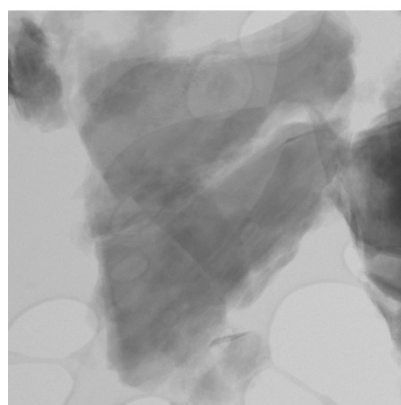

900nm Electron Image 1

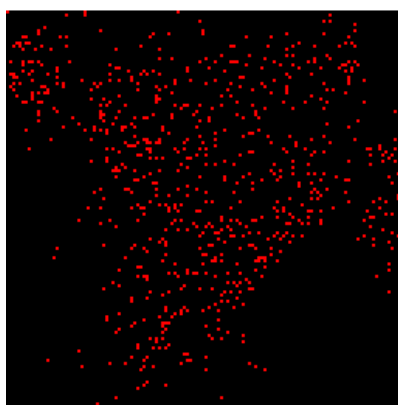

900nm O Ka1

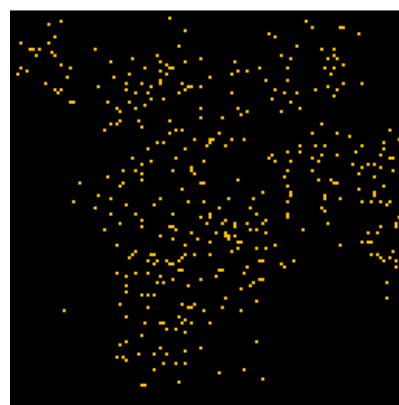

900nm Mg Ka1\_2

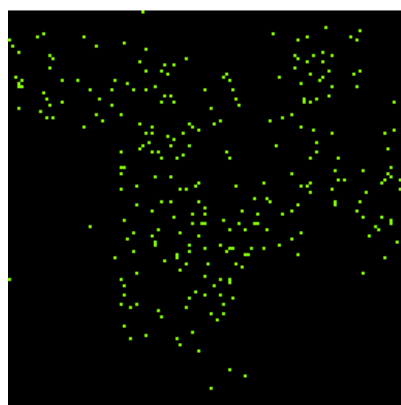

900nm Al Ka1

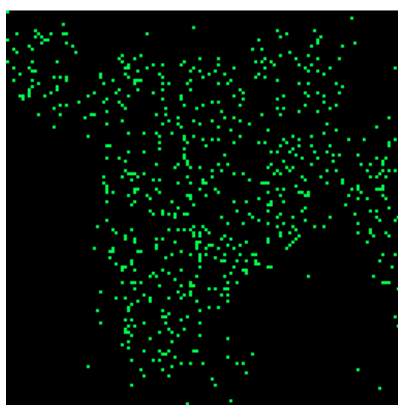

900nm Si Ka1

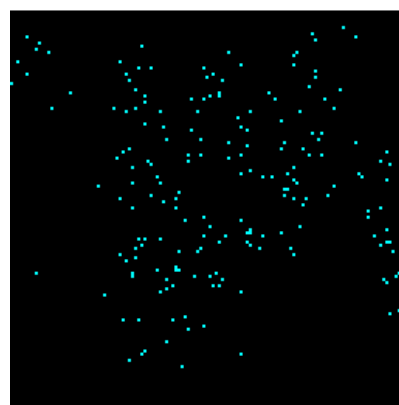

900nm K Ka1

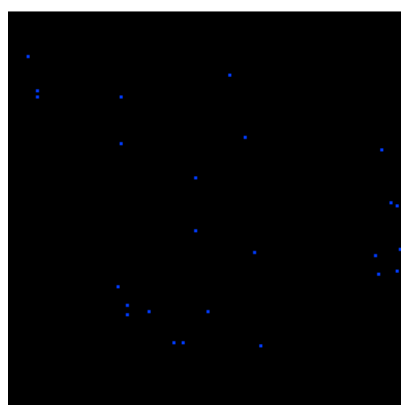

900nm Ca Ka1

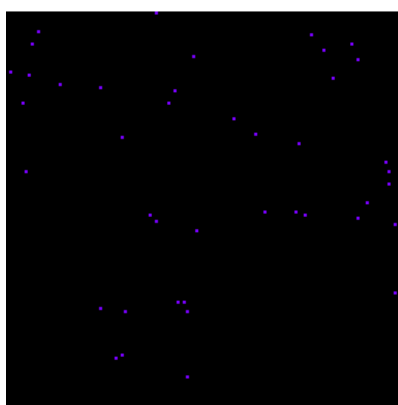

900nm Ti Ka1

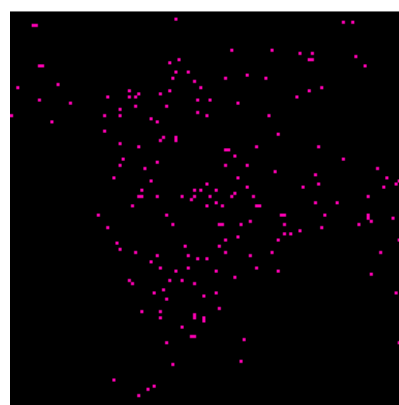

900nm Fe Ka1

Comment:

Project: Project 1

Owner: INCA

Sample: L4M-MW-Ex

Type: Default

| Element | Peak | Area  | k      | Abs    | Weight% | Weight% | Atomic% |
|---------|------|-------|--------|--------|---------|---------|---------|
|         | Area | Sigma | factor | Corrn. |         | Sigma   |         |
| O K     | 996  | 62    | 1.065  | 1.000  | 44.13   | 1.80    | 59.67   |
| Mg K    | 505  | 40    | 0.606  | 1.000  | 12.73   | 0.98    | 11.33   |
| Al K    | 322  | 35    | 0.589  | 1.000  | 7.90    | 0.82    | 6.33    |
| Si K    | 876  | 52    | 0.569  | 1.000  | 20.74   | 1.18    | 15.98   |
| K K     | 246  | 30    | 0.552  | 1.000  | 5.65    | 0.67    | 3.13    |
| Ca K    | 21   | 15    | 0.542  | 1.000  | 0.48    | 0.33    | 0.26    |
| Ti K    | 43   | 16    | 0.608  | 1.000  | 1.08    | 0.40    | 0.49    |
| Fe K    | 258  | 28    | 0.678  | 1.000  | 7.28    | 0.78    | 2.82    |
| Totals  |      |       |        |        | 100.00  |         |         |

Project: Project 1

Owner: INCA

Sample: L4M-MW-Ex

Type: Default

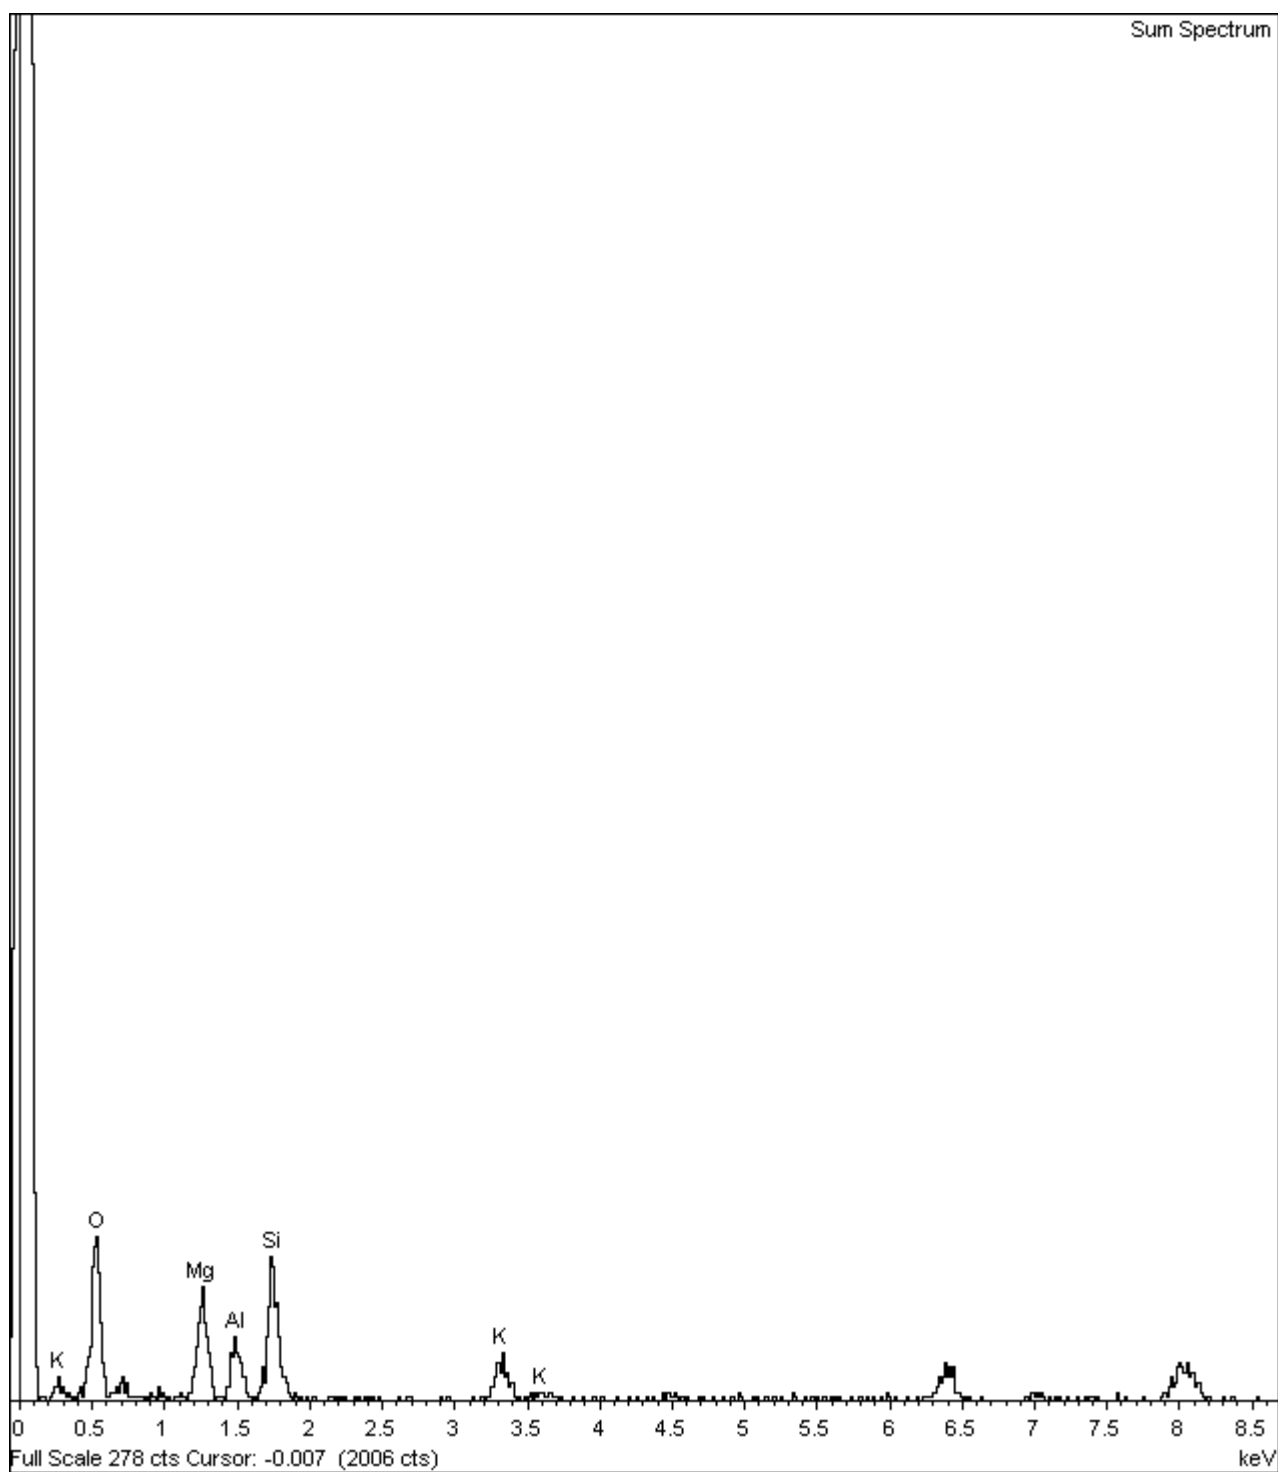

Comment:

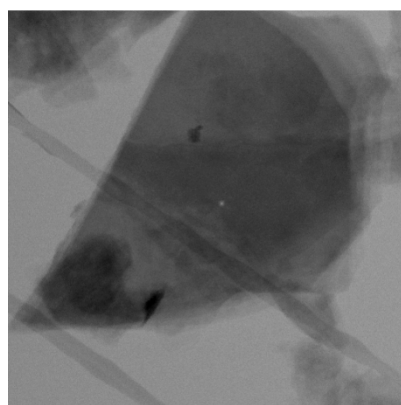

500nm Electron Image 1

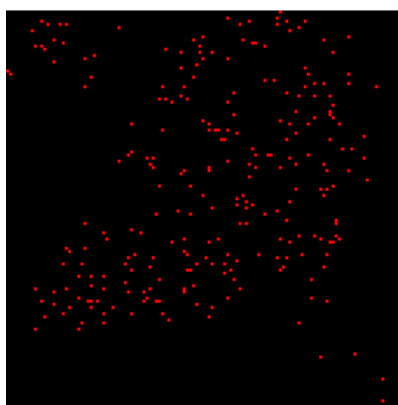

500nm O Ka1

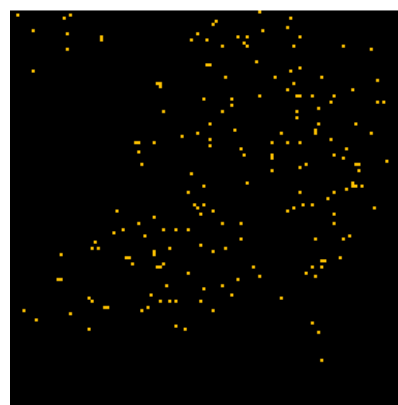

500nm Mg Ka1\_2

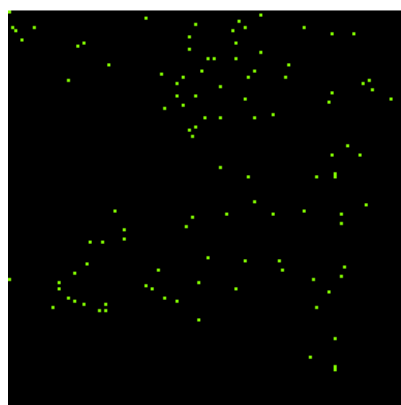

500nm Al Ka1

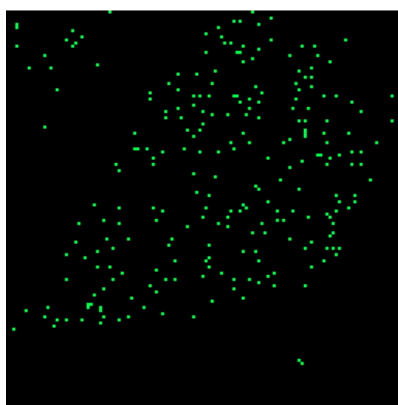

500nm Si Ka1

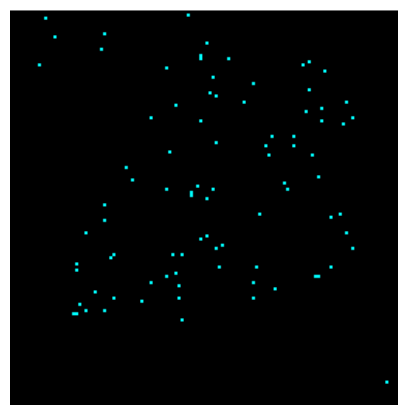

500nm K Ka1

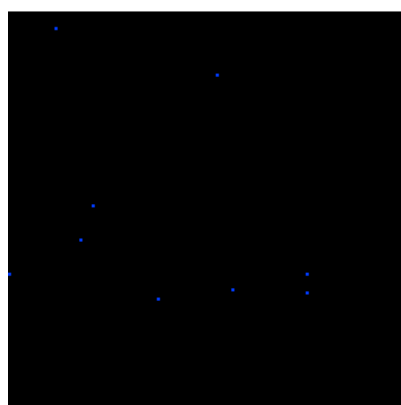

500nm Ca Ka1

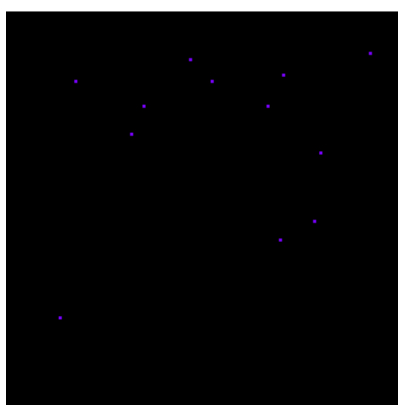

500nm Ti Ka1

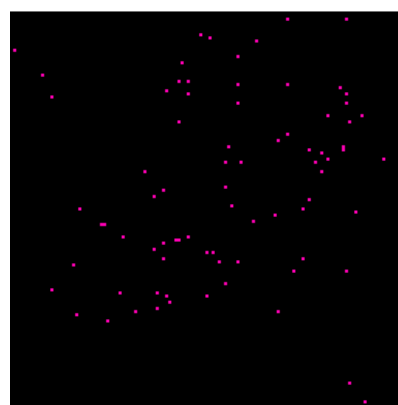

500nm Fe Ka1

Comment:

| Element | Peak | Area  | k      | Abs    | Weight% | Weight% | Atomic% |
|---------|------|-------|--------|--------|---------|---------|---------|
|         | Area | Sigma | factor | Corrn. |         | Sigma   |         |
| O K     | 477  | 42    | 1.065  | 1.000  | 39.79   | 2.45    | 55.63   |
| Mg K    | 307  | 31    | 0.606  | 1.000  | 14.57   | 1.42    | 13.41   |
| Al K    | 185  | 25    | 0.589  | 1.000  | 8.56    | 1.13    | 7.09    |
| Si K    | 430  | 37    | 0.569  | 1.000  | 19.21   | 1.58    | 15.30   |
| K K     | 173  | 23    | 0.552  | 1.000  | 7.50    | 0.98    | 4.29    |
| Ca K    | 8    | 12    | 0.542  | 1.000  | 0.33    | 0.53    | 0.19    |
| Ti K    | 22   | 13    | 0.608  | 1.000  | 1.07    | 0.62    | 0.50    |
| Fe K    | 169  | 22    | 0.678  | 1.000  | 8.97    | 1.13    | 3.59    |
| Totals  |      |       |        |        | 100.00  |         |         |

Project: Project 1

Owner: INCA

Sample: L4M-MW-Ex

Type: Default

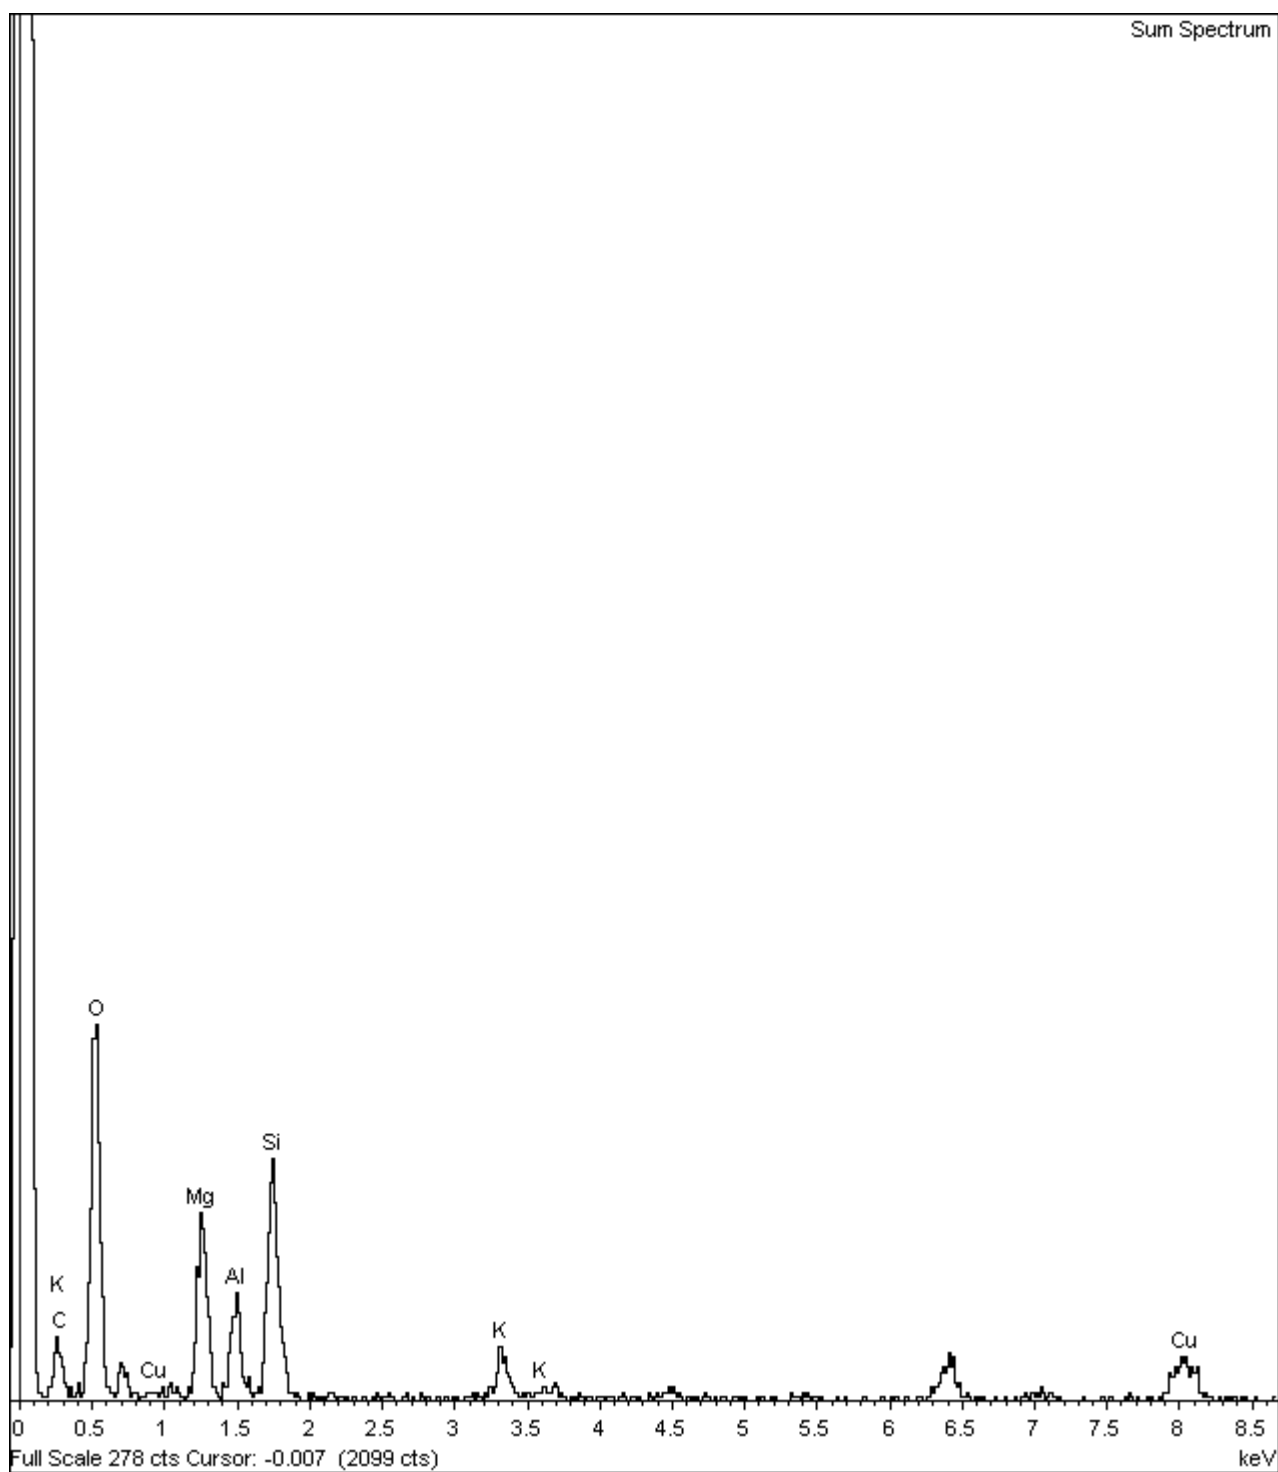

Comment:



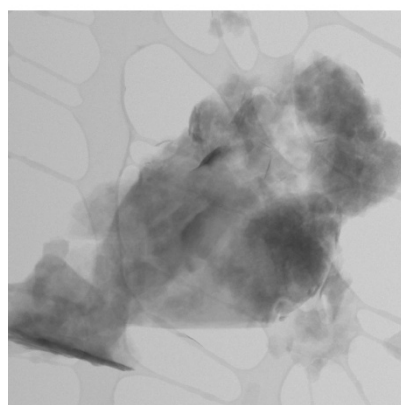

Electron Image 1

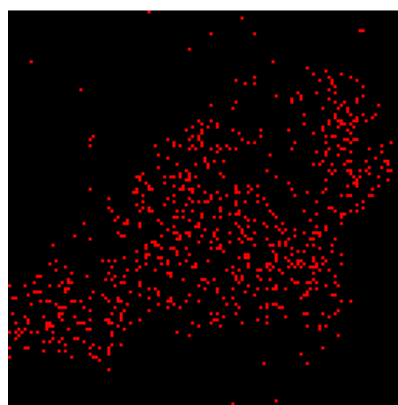

O Ka1

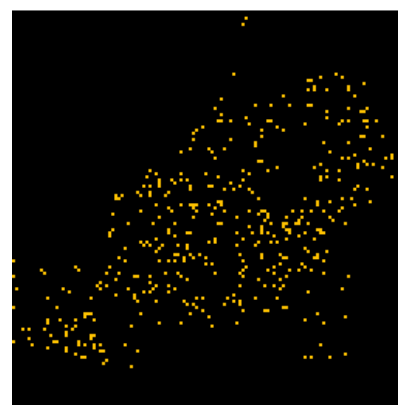

Mg Ka1\_2

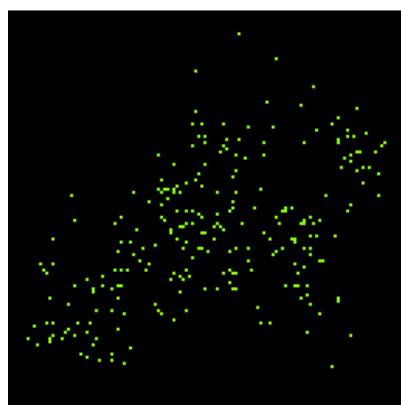

Al Ka1

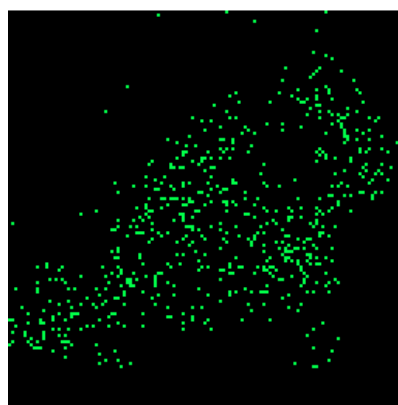

Si Ka1

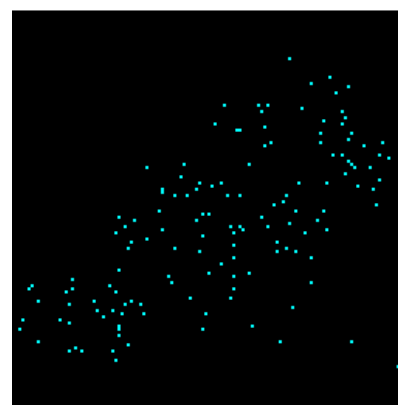

K Ka1

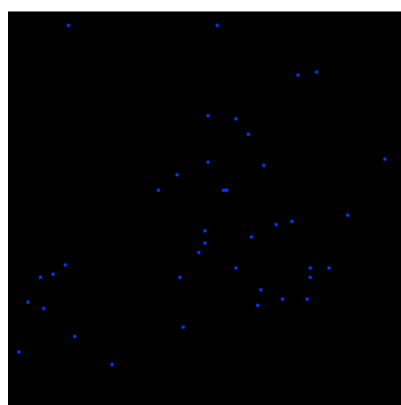

Ca Ka1

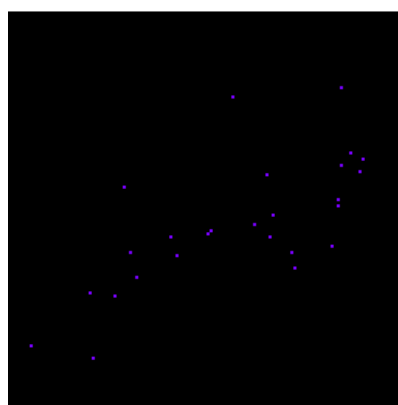

Ti Ka1

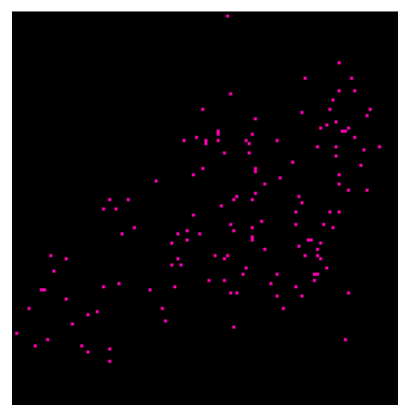

Fe Ka1

Comment:

Project: Project 1

Owner: INCA

Sample: L4M-MW-Ex

Type: Default

| Element | Peak | Area  | k      | Abs   | Weight% | Weight% | Atomic% |
|---------|------|-------|--------|-------|---------|---------|---------|
|         | Area | Sigma | factor | Corn. |         | Sigma   |         |
| O K     | 1069 | 63    | 1.065  | 1.000 | 47.63   | 1.78    | 62.63   |
| Mg K    | 545  | 41    | 0.606  | 1.000 | 13.80   | 1.01    | 11.95   |
| Al K    | 290  | 33    | 0.589  | 1.000 | 7.15    | 0.79    | 5.58    |
| Si K    | 785  | 51    | 0.569  | 1.000 | 18.70   | 1.16    | 14.01   |
| K K     | 226  | 27    | 0.552  | 1.000 | 5.22    | 0.61    | 2.81    |
| Ca K    | 47   | 16    | 0.542  | 1.000 | 1.07    | 0.37    | 0.56    |
| Ti K    | 28   | 14    | 0.608  | 1.000 | 0.72    | 0.34    | 0.32    |
| Fe K    | 201  | 25    | 0.678  | 1.000 | 5.71    | 0.70    | 2.15    |
| Totals  |      |       |        |       | 100.00  |         |         |

Project: Project 1

Owner: INCA

Sample: L4M-MW-Ex

Type: Default

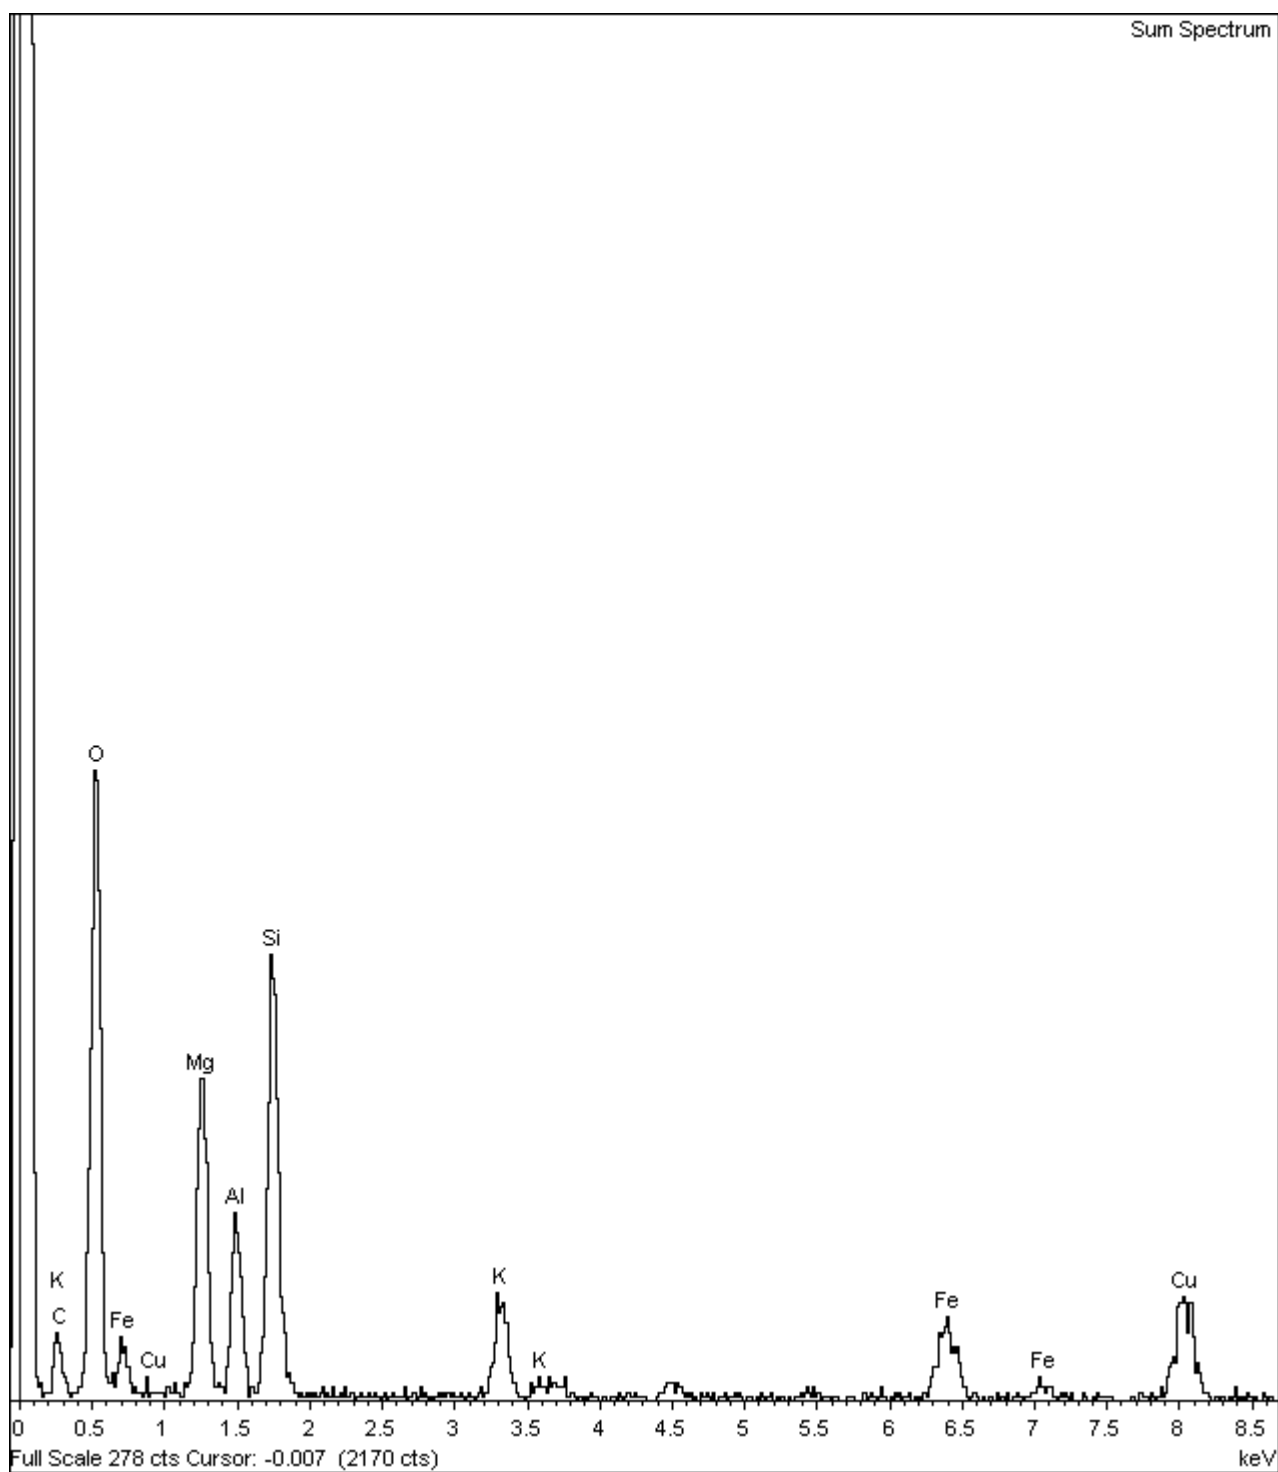

Comment:

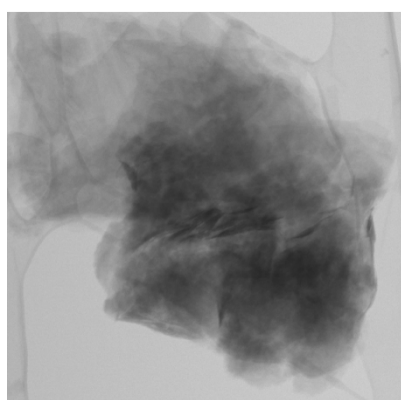

1µm Electron Image 1

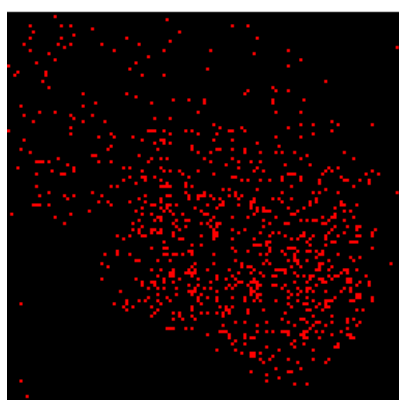

1µm O Ka1

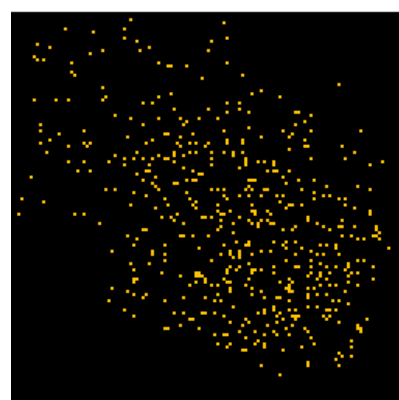

1µm Mg Ka1\_2

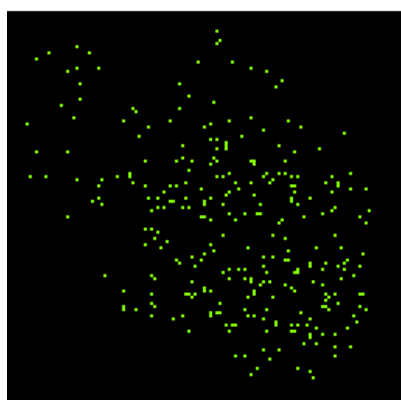

1µm Al Ka1

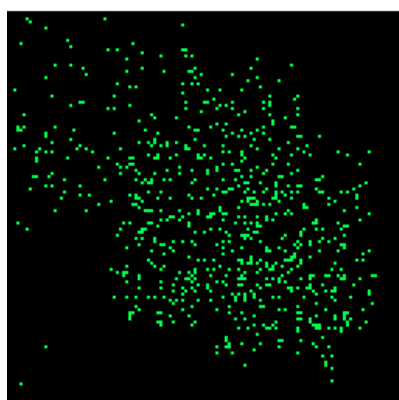

1µm Si Ka1

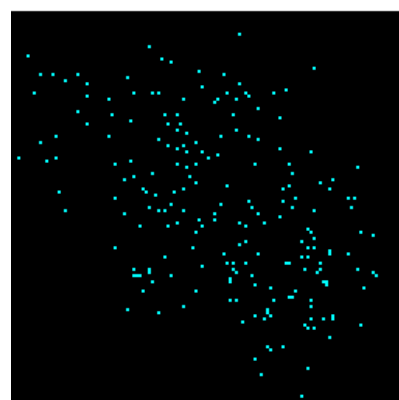

1µm K Ka1

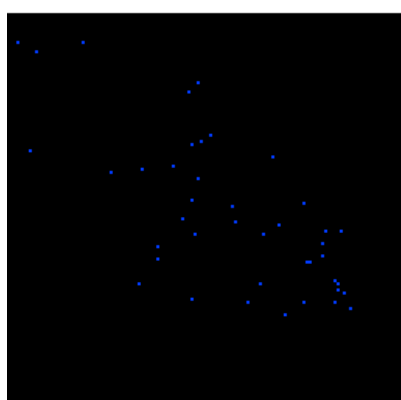

1µm Ca Ka1

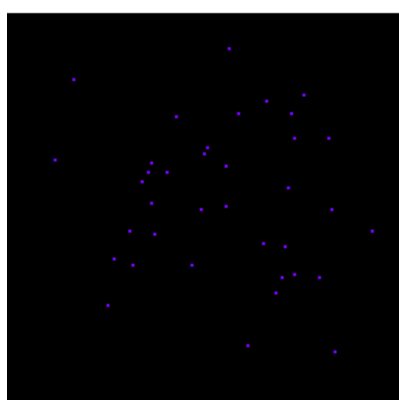

1µm Ti Ka1

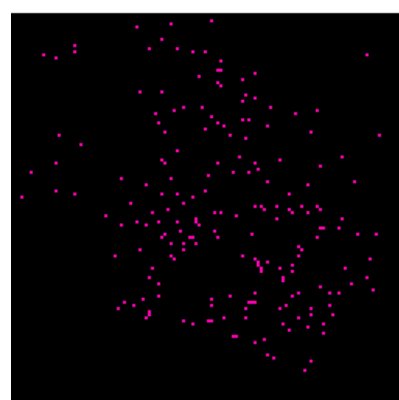

1µm Fe Ka1

Comment:

Project: Project 1

Owner: INCA

Sample: L4M-MW-Ex

Type: Default

| Element | Peak | Area  | k      | Abs    | Weight% | Weight% | Atomic% |
|---------|------|-------|--------|--------|---------|---------|---------|
|         | Area | Sigma | factor | Cornn. |         | Sigma   |         |
| O K     | 1875 | 84    | 1.065  | 1.000  | 45.64   | 1.33    | 60.80   |
| Mg K    | 1036 | 57    | 0.606  | 1.000  | 14.34   | 0.76    | 12.57   |
| Al K    | 517  | 45    | 0.589  | 1.000  | 6.96    | 0.59    | 5.50    |
| Si K    | 1514 | 68    | 0.569  | 1.000  | 19.70   | 0.86    | 14.95   |
| K K     | 451  | 38    | 0.552  | 1.000  | 5.69    | 0.47    | 3.10    |
| Ca K    | 47   | 21    | 0.542  | 1.000  | 0.58    | 0.26    | 0.31    |
| Ti K    | 66   | 18    | 0.608  | 1.000  | 0.92    | 0.25    | 0.41    |
| Fe K    | 398  | 37    | 0.678  | 1.000  | 6.17    | 0.55    | 2.35    |
| Totals  |      |       |        |        | 100.00  |         |         |



Project: Project 1

Owner: INCA

Sample: L4M-MW-Ex

Type: Default

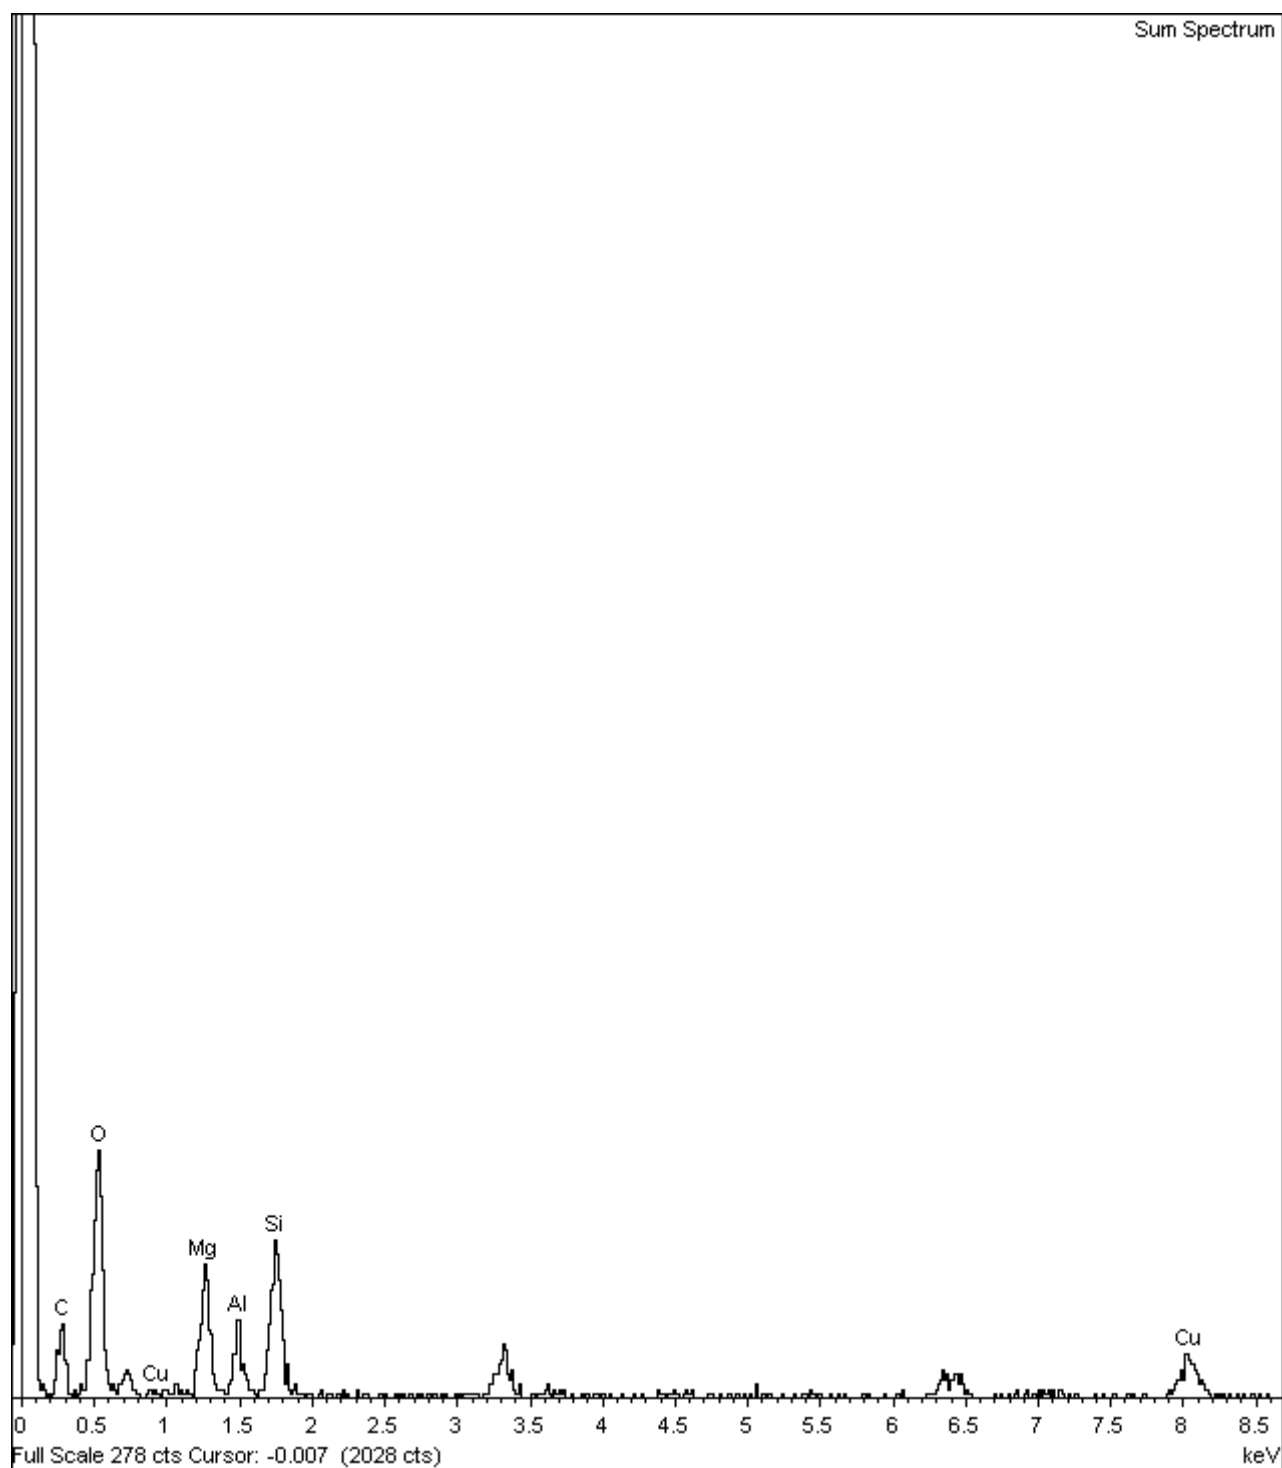

Comment:

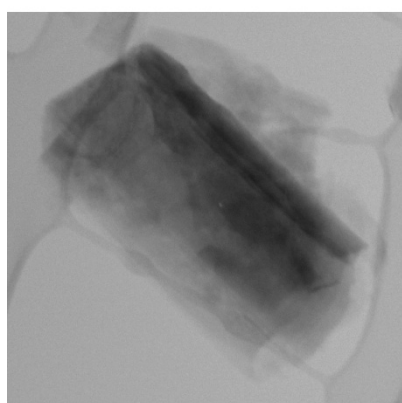

500nm Electron Image 1

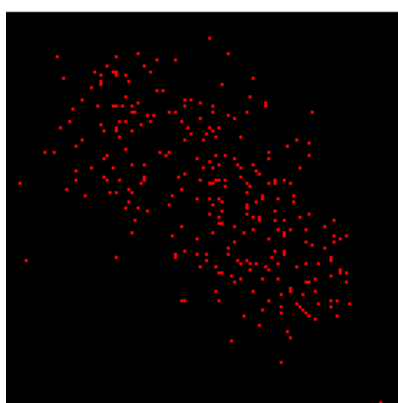

500nm O Ka1

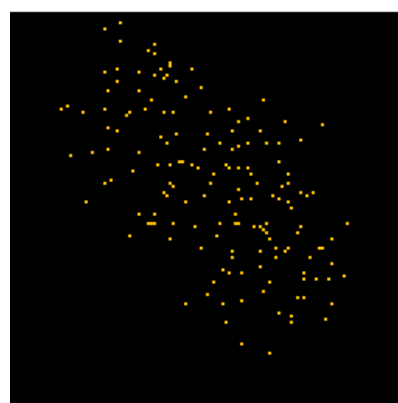

500nm Mg Ka1\_2

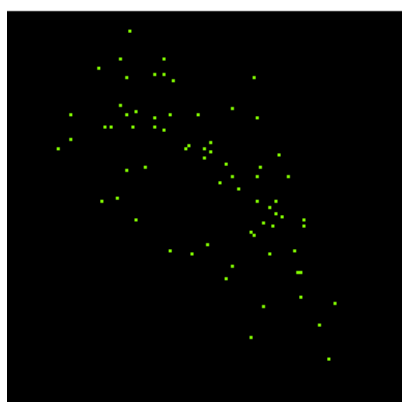

500nm Al Ka1

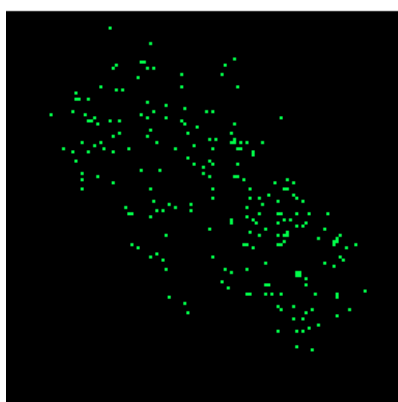

500nm Si Ka1

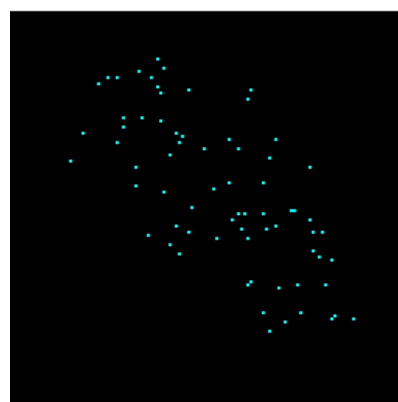

500nm K Ka1

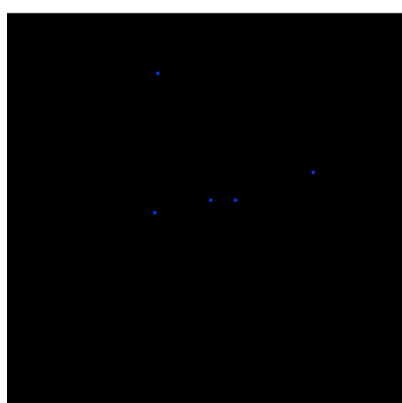

500nm Ca Ka1

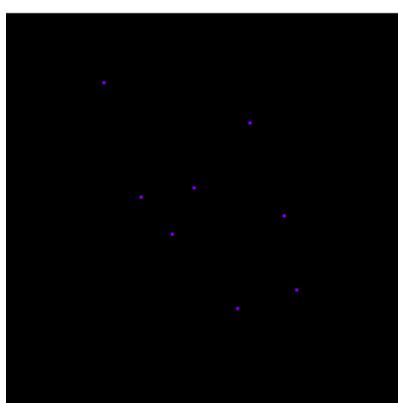

500nm Ti Ka1

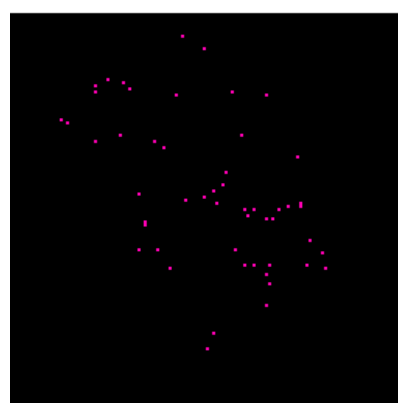

500nm Fe Ka1

Comment:



Project: Project 1

Owner: INCA

Sample: L4M-MW-Ex

Type: Default

Label : Sum Spectrum

Collected : 13-May-2014 03:59 PM

Livetime (s) : 131.07

Real time (s) : 0.00

Detector : X-Max

Window : SATW

Tilt (deg) : 0.0

Elevation (deg) : 17.7

Azimuth (deg) : 0.0

Sample thickness: 0.0 nm

Sample density: 0.00 g/cm<sup>3</sup>

Spectrum processing :

Peak possibly omitted : 8.037 keV

Quantitation method : Cliff Lorimer thin ratio section.

Processing option : All elements analyzed (Normalised)

Number of iterations = 1

Standardless

| Element | Peak | Area  | k      | Abs   | Weight% | Weight% | Atomic% |
|---------|------|-------|--------|-------|---------|---------|---------|
|         | Area | Sigma | factor | Corn. |         | Sigma   |         |
| O K     | 724  | 53    | 1.065  | 1.000 | 48.97   | 2.24    | 63.52   |

|        |     |    |       |       |        |      |       |
|--------|-----|----|-------|-------|--------|------|-------|
| Mg K   | 376 | 34 | 0.606 | 1.000 | 14.45  | 1.28 | 12.34 |
| Al K   | 176 | 26 | 0.589 | 1.000 | 6.59   | 0.96 | 5.07  |
| Si K   | 519 | 41 | 0.569 | 1.000 | 18.75  | 1.43 | 13.86 |
| K K    | 165 | 23 | 0.552 | 1.000 | 5.78   | 0.80 | 3.07  |
| Ca K   | 25  | 12 | 0.542 | 1.000 | 0.85   | 0.41 | 0.44  |
| Ti K   | 3   | 13 | 0.608 | 1.000 | 0.10   | 0.49 | 0.04  |
| Fe K   | 104 | 21 | 0.678 | 1.000 | 4.50   | 0.90 | 1.67  |
| Totals |     |    |       |       | 100.00 |      |       |
