# Supplementary material for: Heterogeneous Distribution of Interlayer Cations and Iron as a Plausible Explanation of the Non-Exfoliation of Commercial Vermiculites Post Alcohol Treatment and Microwave Irradiation
Source: MDPI journal article supplement (doi:10.3390/min11080835), 2021-08-01
Supplement: s1 [file s1]

Project: Project 1

Owner: INCA

Sample: CHG-4P-MW-No

Type: Default

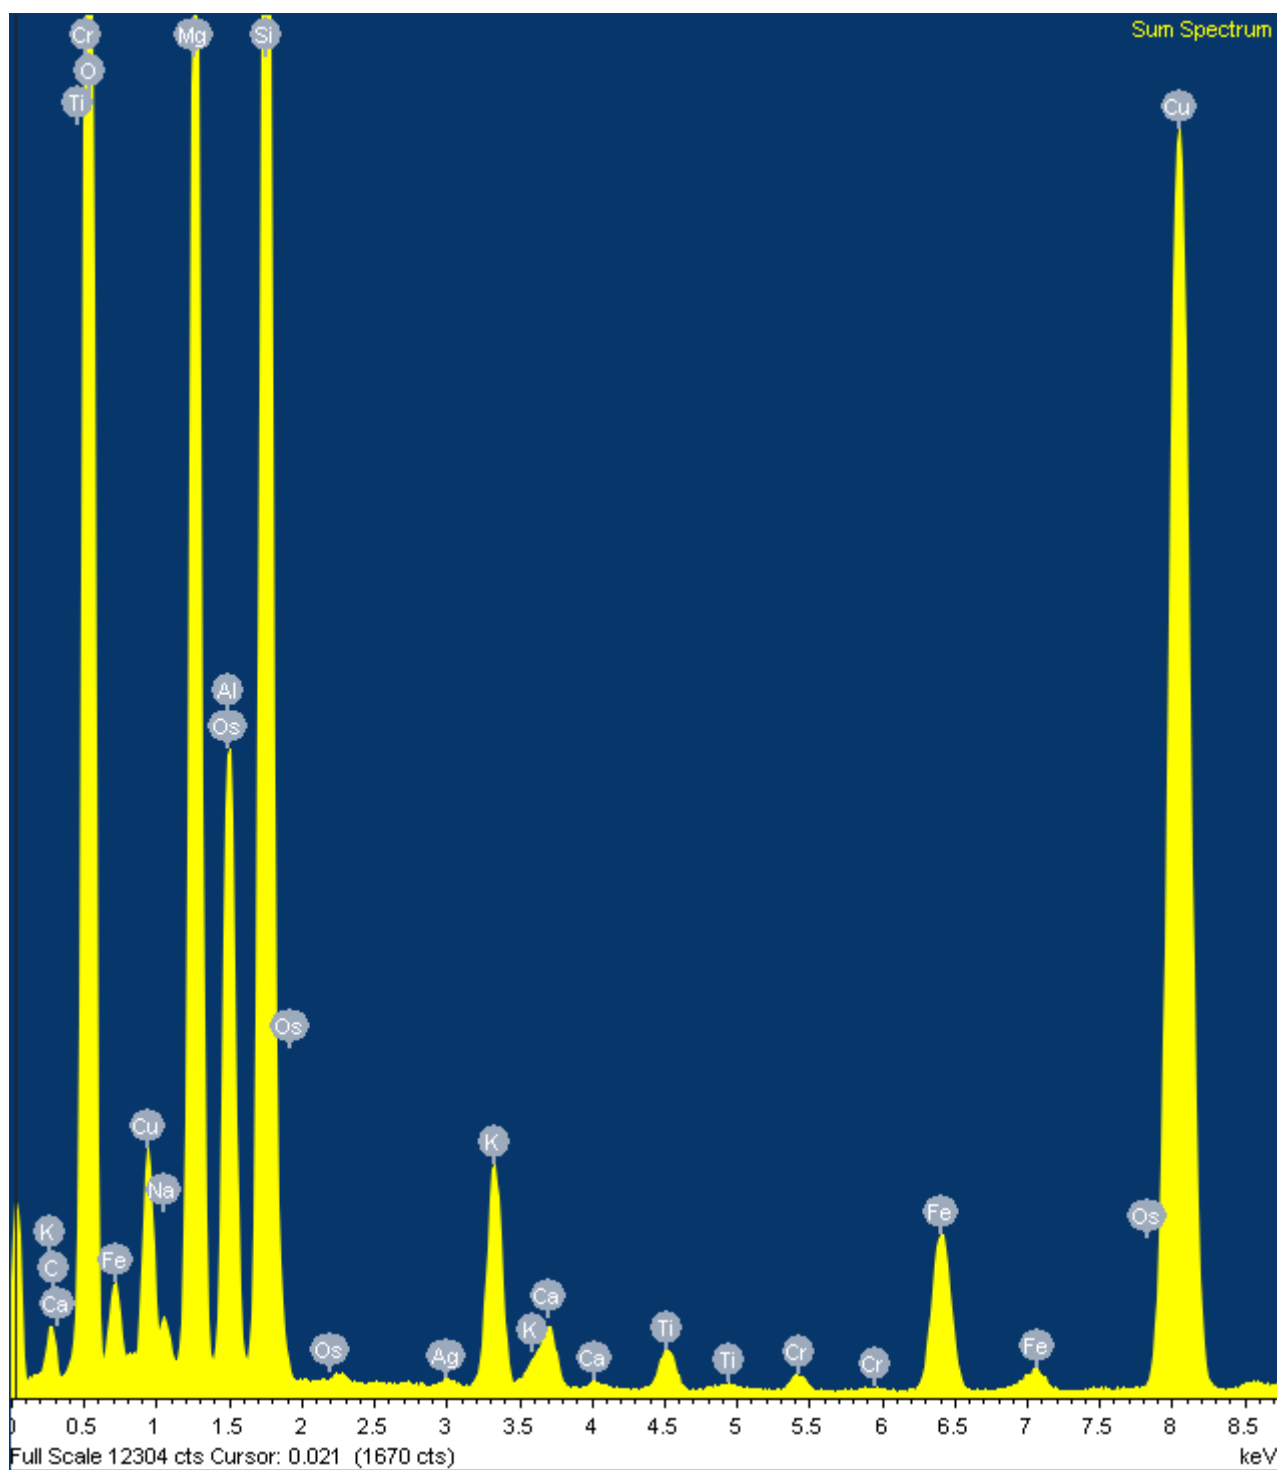

Comment:

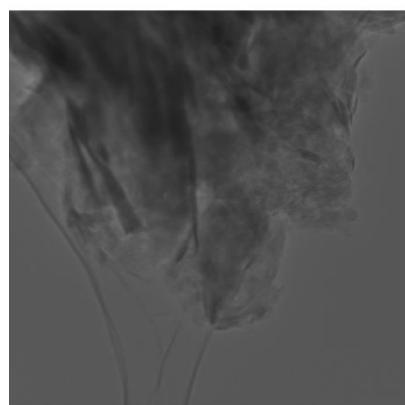

Electron Image 1

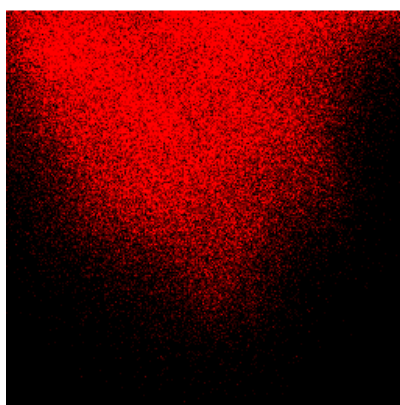

O Ka1

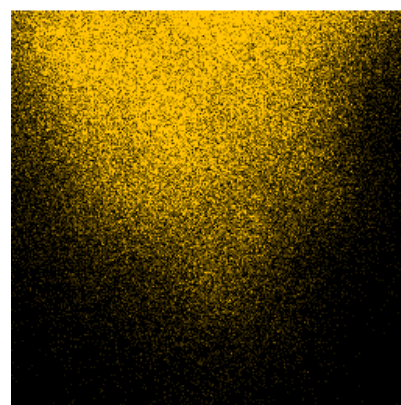

Mg Ka1\_2

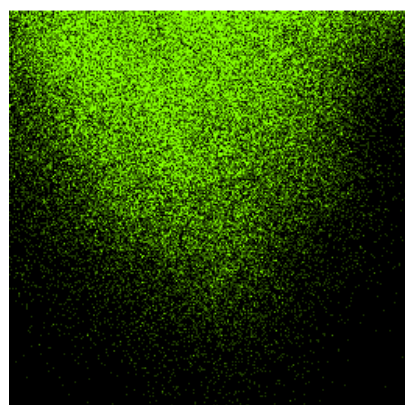

Al Ka1

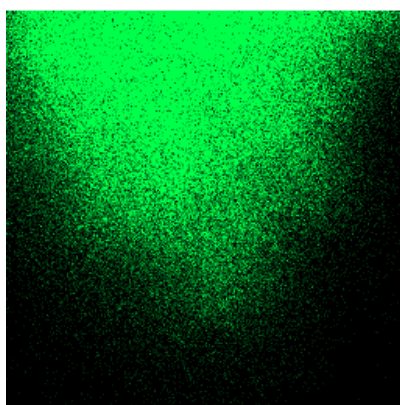

Si Ka1

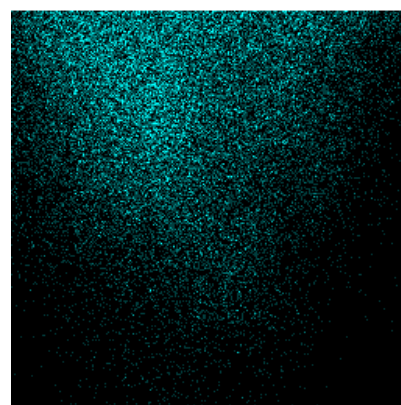

K Ka1

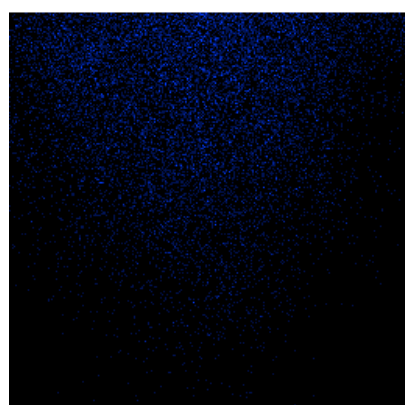

Ca Ka1

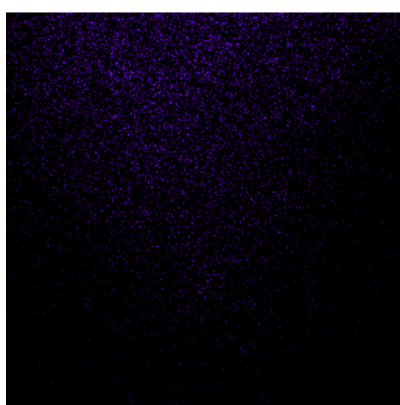

Ti Ka1

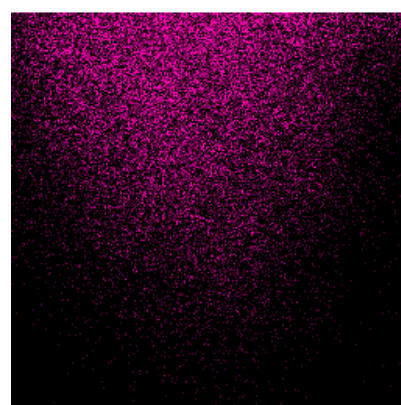

Fe Ka1

Comment:

Project: Project 1

Owner: INCA

Sample: CHG-4P-MW-No

Type: Default

Label : Sum Spectrum

Collected : 15-May-2014 02:16 PM

Livetime (s) : 72.09

Real time (s) : 0.00

Detector : X-Max

Window : SATW

Tilt (deg) : 0.0

Elevation (deg) : 17.7

Azimuth (deg) : 0.0

Sample thickness: 0.0 nm

Sample density: 0.00 g/cm3

| Element | Peak   | Area  | k      | Abs    | Weight% | Weight% | Atomic% |
|---------|--------|-------|--------|--------|---------|---------|---------|
|         | Area   | Sigma | factor | Corrn. |         | Sigma   |         |
| O K     | 313378 | 1028  | 1.065  | 1.000  | 43.54   | 0.10    | 57.76   |
| Mg K    | 225078 | 841   | 0.606  | 1.000  | 17.79   | 0.06    | 15.53   |
| Al K    | 96650  | 624   | 0.589  | 1.000  | 7.43    | 0.05    | 5.85    |
| Si K    | 294491 | 972   | 0.569  | 1.000  | 21.87   | 0.07    | 16.53   |
| K K     | 49916  | 432   | 0.552  | 1.000  | 3.59    | 0.03    | 1.95    |
| Ca K    | 13386  | 285   | 0.542  | 1.000  | 0.95    | 0.02    | 0.50    |
| Ti K    | 10007  | 239   | 0.608  | 1.000  | 0.79    | 0.02    | 0.35    |
| Fe K    | 45577  | 396   | 0.678  | 1.000  | 4.03    | 0.03    | 1.53    |
| Totals  |        |       |        |        | 100.00  |         |         |



Project: Project 1

Owner: INCA

Sample: CHG-4P-MW-No

Type: Default

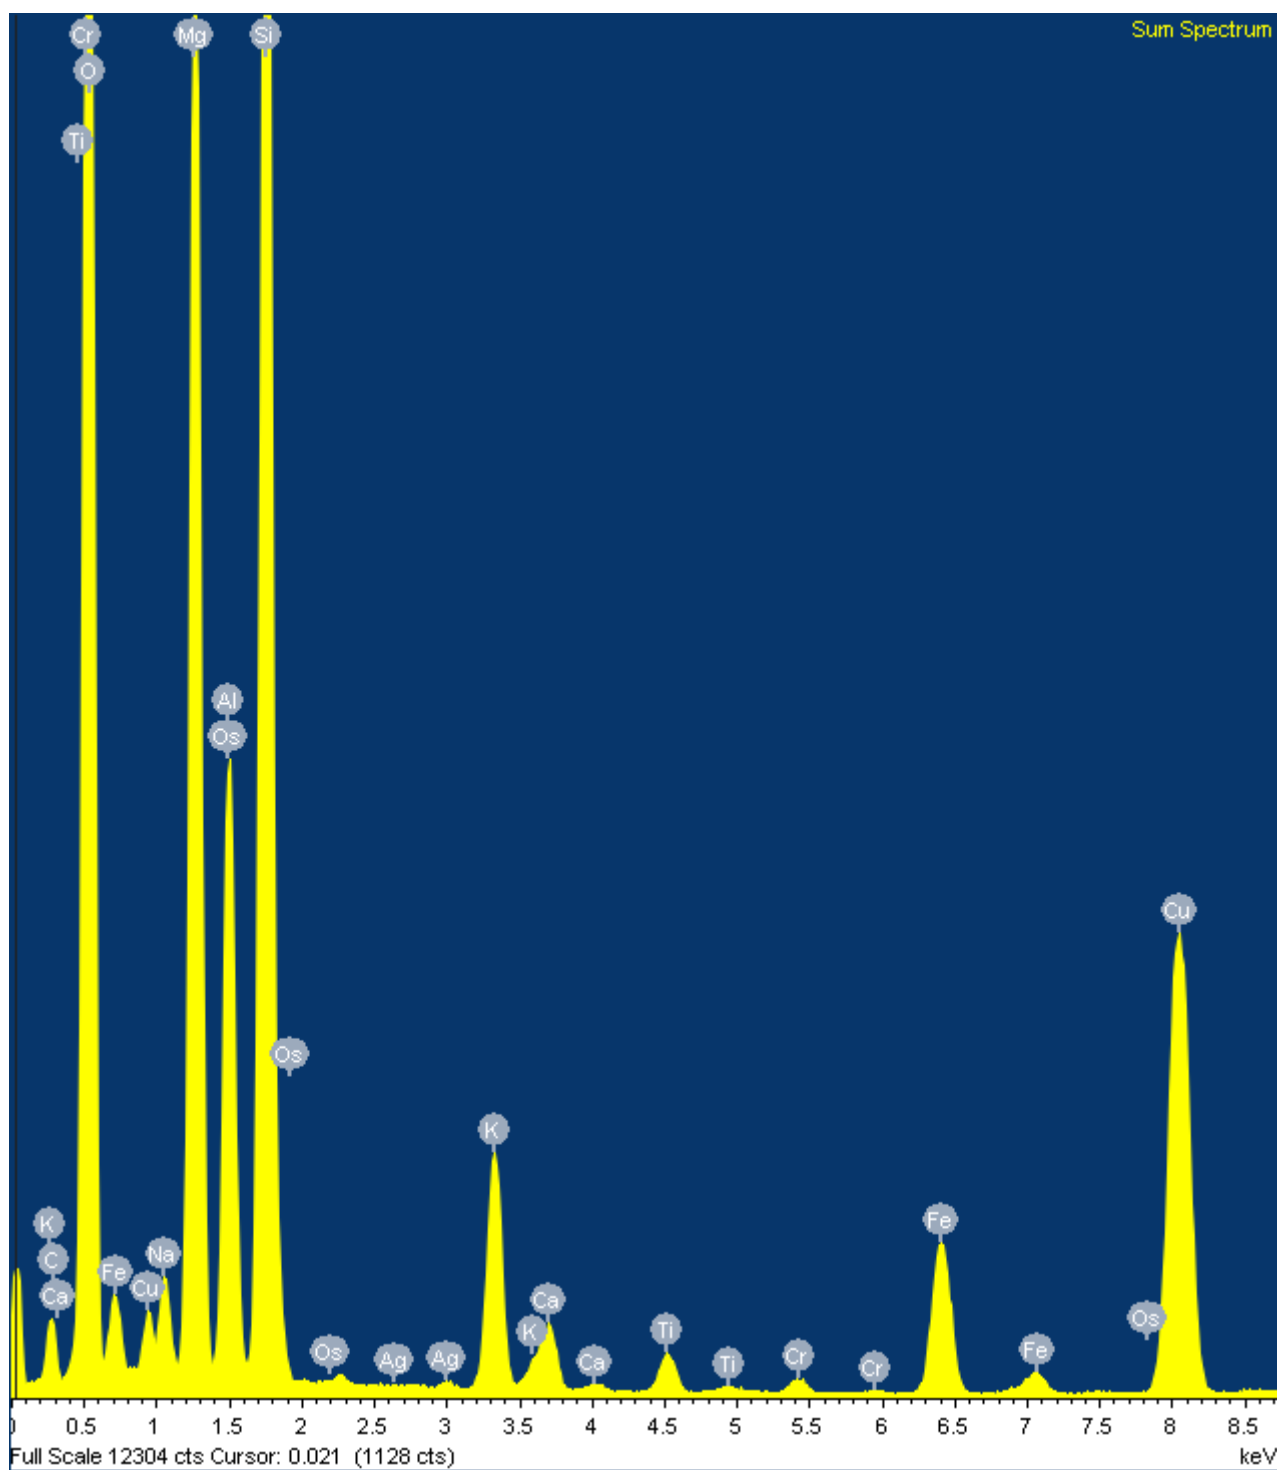

Comment:

# Project 1

15/05/2014 14:25:05

Project: Project 1

Owner: INCA

Sample: CHG-4P-MW-No

Type: Default

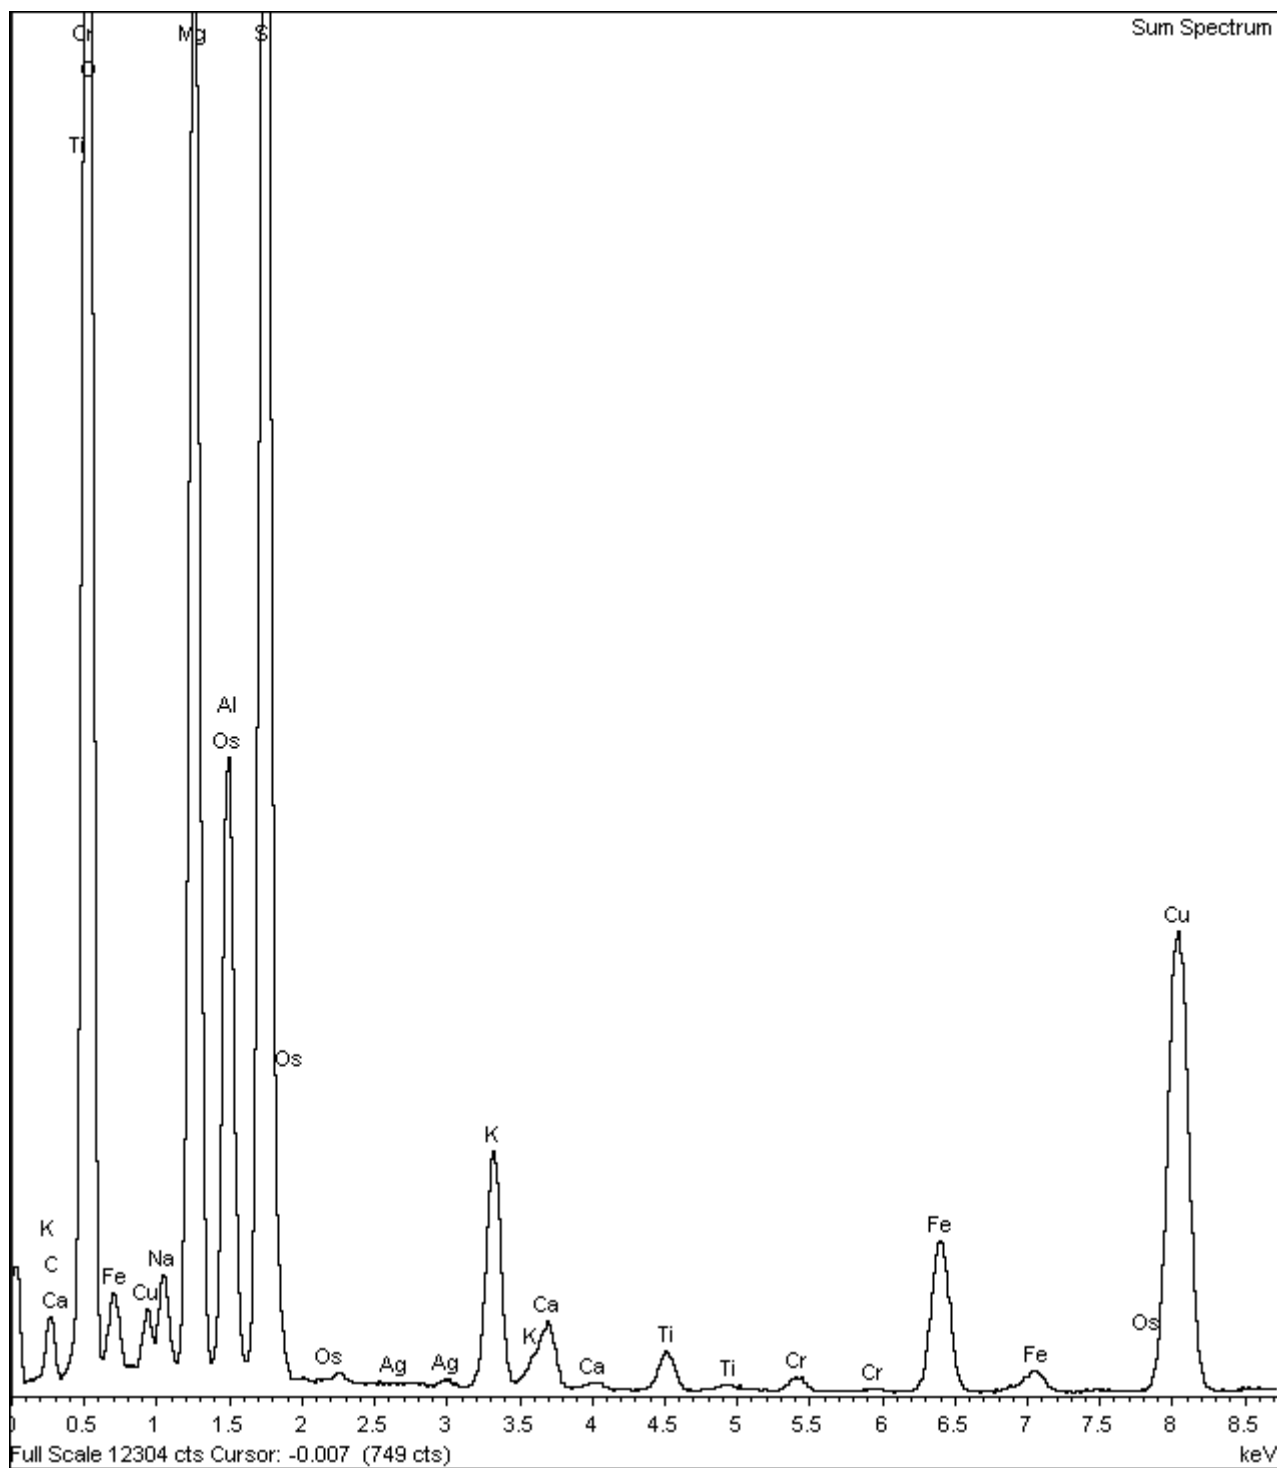

Comment:

**INCA**

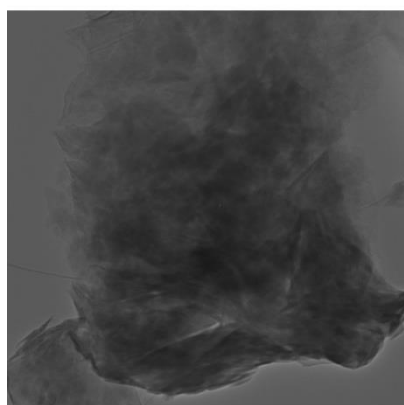

Electron Image 1

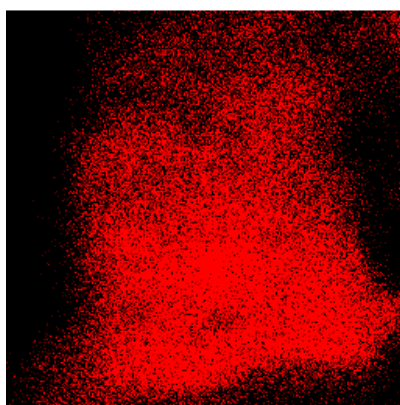

O Ka1

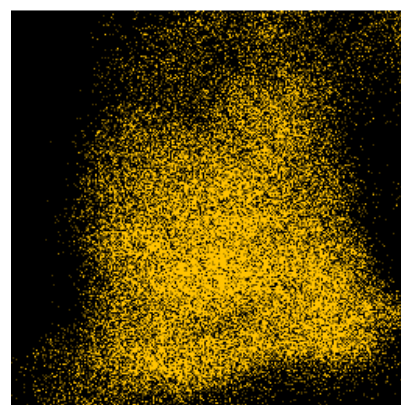

Mg Ka1\_2

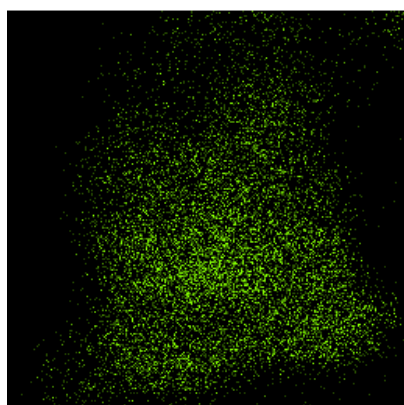

Al Ka1

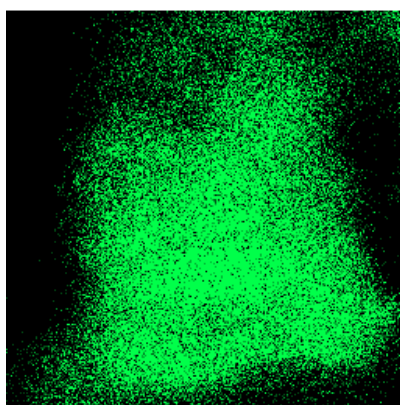

Si Ka1

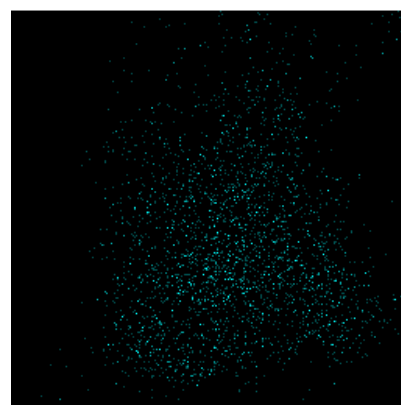

K Ka1

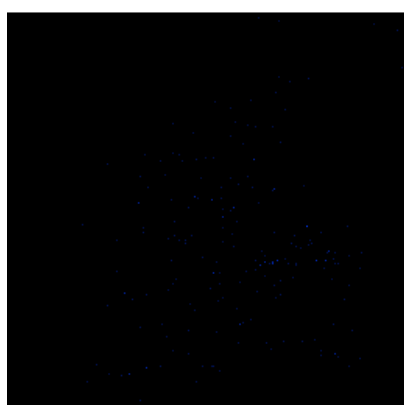

Ca Ka1

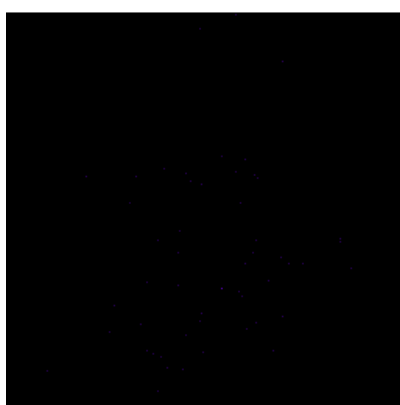

Ti Ka1

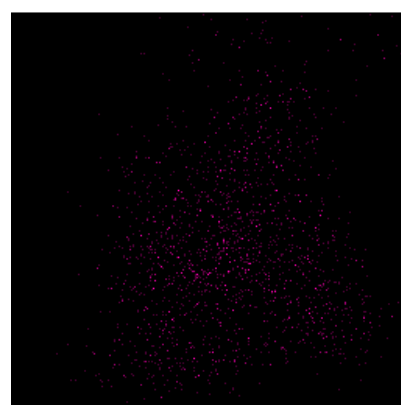

Fe Ka1

Comment:

Project: Project 1

Owner: INCA

Sample: CHG-4P-MW-No

Type: Default

Label : Sum Spectrum

Collected : 15-May-2014 02:24 PM

Livetime (s) : 45.88

Real time (s) : 0.00

Detector : X-Max

Window : SATW

Tilt (deg) : 0.0

Elevation (deg) : 17.7

Azimuth (deg) : 0.0

Sample thickness: 0.0 nm

Sample density: 0.00 g/cm3

| Element | Peak   | Area  | k      | Abs    | Weight% | Weight% | Atomic% |
|---------|--------|-------|--------|--------|---------|---------|---------|
|         | Area   | Sigma | factor | Corrn. |         | Sigma   |         |
| O K     | 307976 | 1016  | 1.065  | 1.000  | 43.82   | 0.10    | 58.09   |
| Mg K    | 217597 | 824   | 0.606  | 1.000  | 17.61   | 0.06    | 15.36   |
| Al K    | 93601  | 611   | 0.589  | 1.000  | 7.37    | 0.05    | 5.79    |
| Si K    | 282276 | 949   | 0.569  | 1.000  | 21.46   | 0.07    | 16.21   |
| K K     | 53430  | 440   | 0.552  | 1.000  | 3.94    | 0.03    | 2.14    |
| Ca K    | 14509  | 282   | 0.542  | 1.000  | 1.05    | 0.02    | 0.56    |
| Ti K    | 9316   | 222   | 0.608  | 1.000  | 0.76    | 0.02    | 0.34    |
| Fe K    | 43986  | 379   | 0.678  | 1.000  | 3.98    | 0.03    | 1.51    |
| Totals  |        |       |        |        | 100.00  |         |         |



Project: Project 1

Owner: INCA

Sample: CHG-4P-MW-No

Type: Default

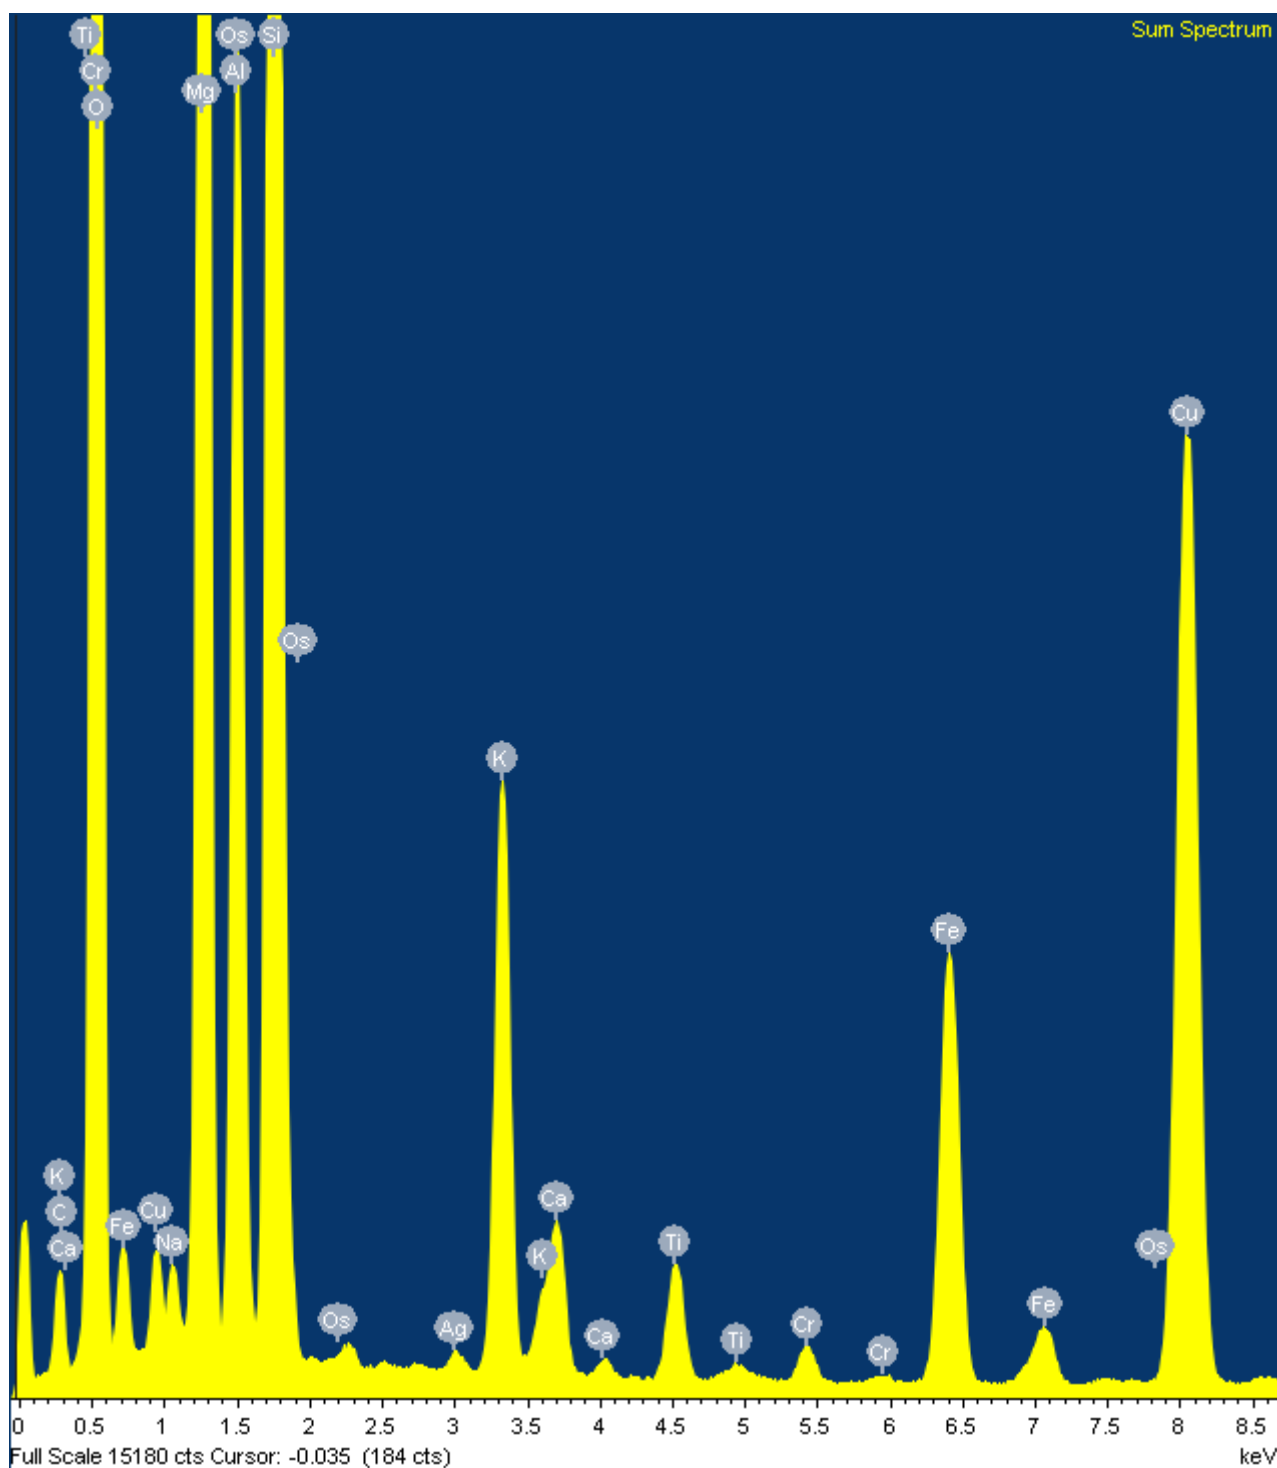

Comment:

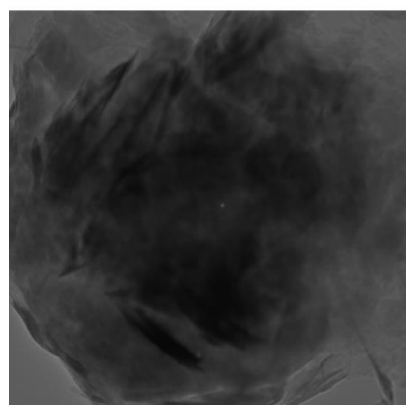

1µm Electron Image 1

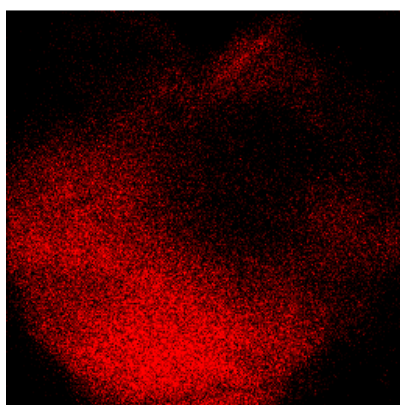

1µm O Ka1

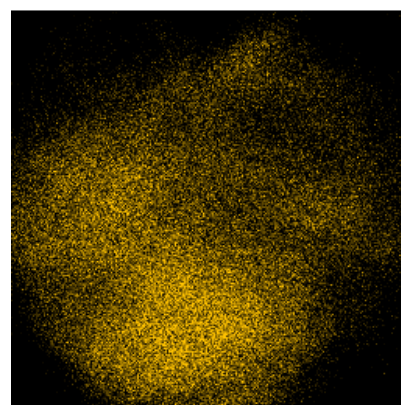

1µm Mg Ka1\_2

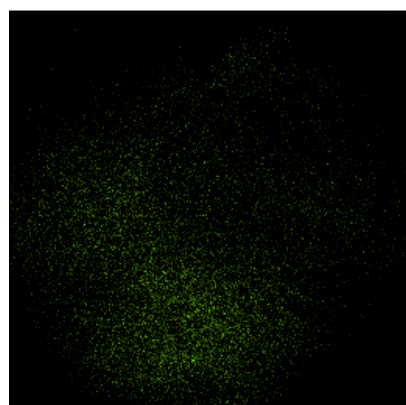

1µm Al Ka1

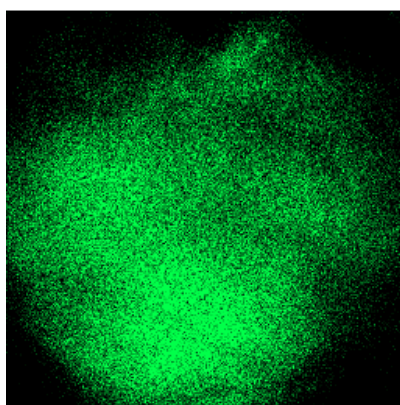

1µm Si Ka1

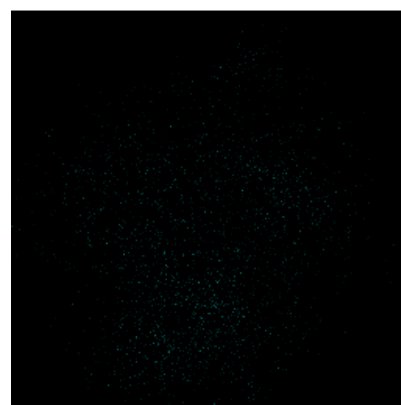

1µm K Ka1

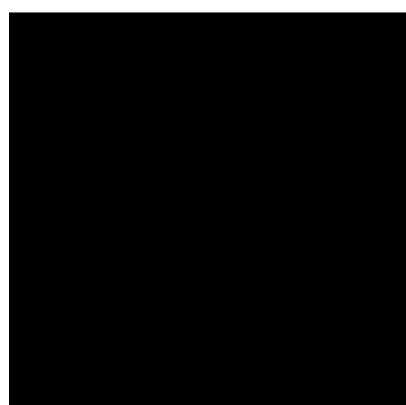

1µm Ca Ka1

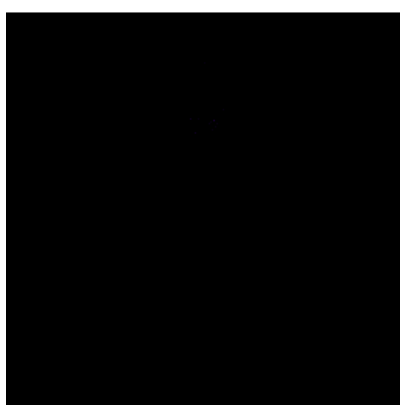

1µm Ti Ka1

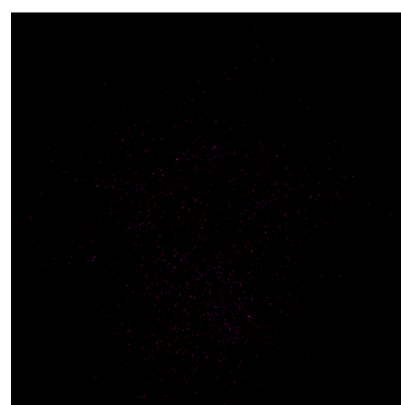

1µm Fe Ka1

Comment:

Project: Project 1

Owner: INCA

Sample: CHG-4P-MW-No

Type: Default

Label : Sum Spectrum

Collected : 15-May-2014 02:37 PM

Livetime (s) : 85.20

Real time (s) : 0.00

Detector : X-Max

Window : SATW

Tilt (deg) : 0.0

Elevation (deg) : 17.7

Azimuth (deg) : 0.0

Sample thickness: 0.0 nm

Sample density: 0.00 g/cm3

| Element | Peak   | Area  | k      | Abs    | Weight% | Weight% | Atomic% |
|---------|--------|-------|--------|--------|---------|---------|---------|
|         | Area   | Sigma | factor | Corrn. |         | Sigma   |         |
| O K     | 617904 | 1431  | 1.065  | 1.000  | 35.85   | 0.06    | 50.26   |
| Mg K    | 568752 | 1334  | 0.606  | 1.000  | 18.77   | 0.04    | 17.31   |
| Al K    | 245453 | 992   | 0.589  | 1.000  | 7.88    | 0.03    | 6.55    |
| Si K    | 786864 | 1582  | 0.569  | 1.000  | 24.40   | 0.05    | 19.48   |
| K K     | 166646 | 776   | 0.552  | 1.000  | 5.01    | 0.02    | 2.87    |
| Ca K    | 41940  | 493   | 0.542  | 1.000  | 1.24    | 0.01    | 0.69    |
| Ti K    | 35250  | 417   | 0.608  | 1.000  | 1.17    | 0.01    | 0.55    |
| Fe K    | 153775 | 703   | 0.678  | 1.000  | 5.68    | 0.03    | 2.28    |
| Totals  |        |       |        |        | 100.00  |         |         |

Project: Project 1

Owner: INCA

Sample: CHG-4P-MW-No

Type: Default

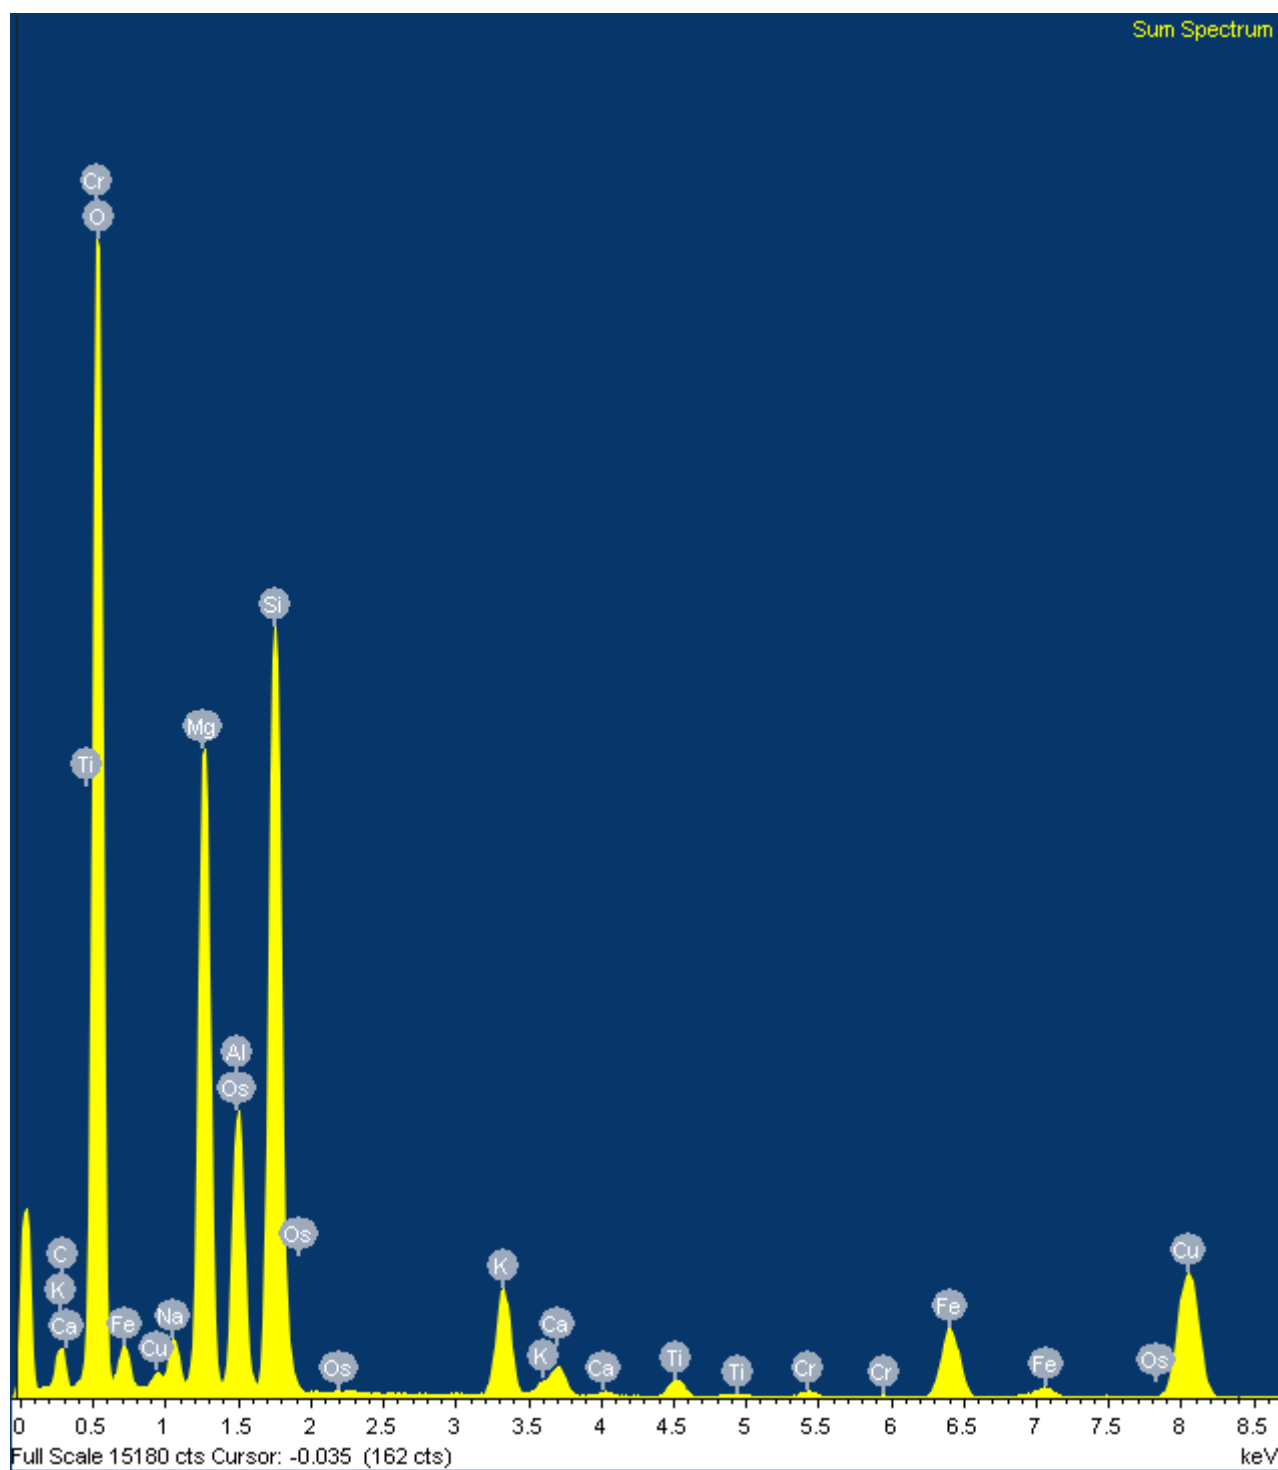

Comment:

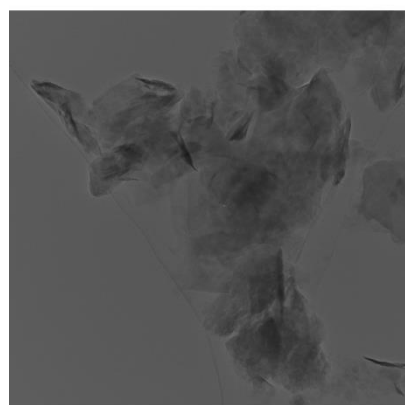

3µm Electron Image 1

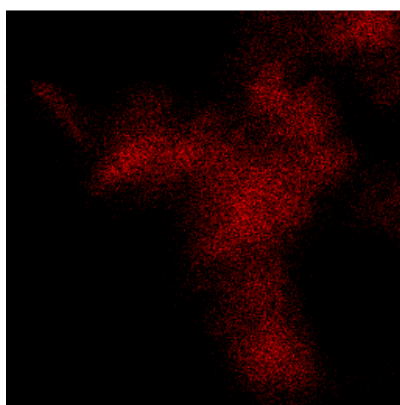

3µm O Ka1

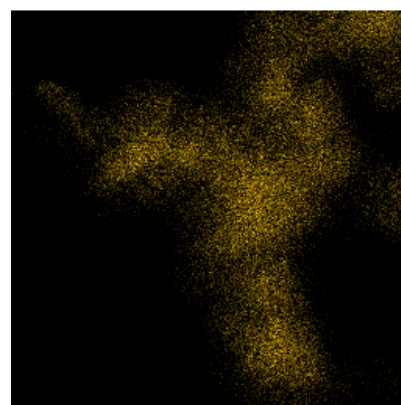

3µm Mg Ka1\_2

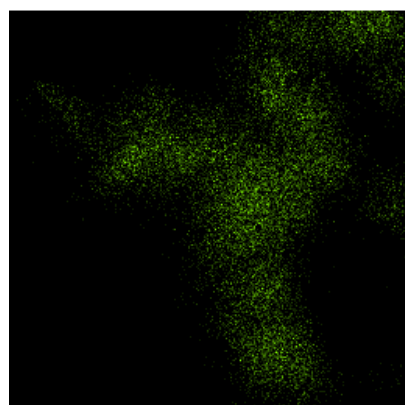

3µm Al Ka1

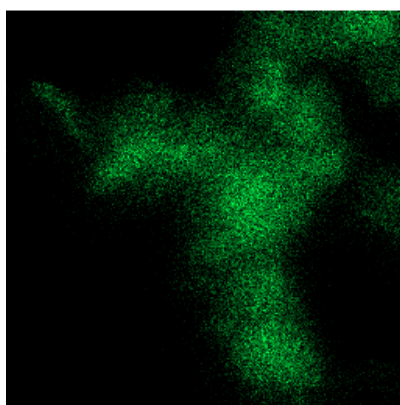

3µm Si Ka1

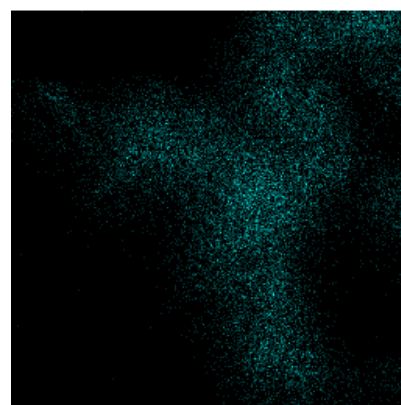

3µm K Ka1

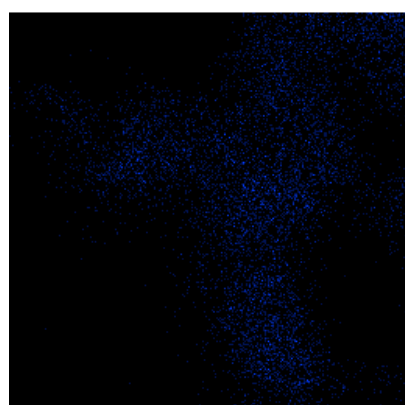

3µm Ca Ka1

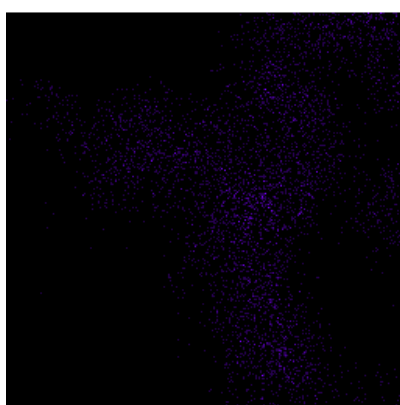

3µm Ti Ka1

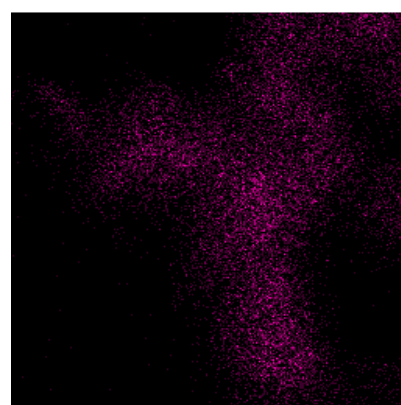

3µm Fe Ka1

Comment:

Project: Project 1

Owner: INCA

Sample: CHG-4P-MW-No

Type: Default

Label : Sum Spectrum

Collected : 15-May-2014 02:44 PM

Livetime (s) : 78.64

Real time (s) : 0.00

Detector : X-Max

Window : SATW

Tilt (deg) : 0.0

Elevation (deg) : 17.7

Azimuth (deg) : 0.0

Sample thickness: 0.0 nm

Sample density: 0.00 g/cm3

| Element | Peak   | Area  | k      | Abs    | Weight% | Weight% | Atomic% |
|---------|--------|-------|--------|--------|---------|---------|---------|
|         | Area   | Sigma | factor | Corrn. |         | Sigma   |         |
| O K     | 187467 | 793   | 1.065  | 1.000  | 45.96   | 0.13    | 60.15   |
| Mg K    | 121905 | 617   | 0.606  | 1.000  | 17.00   | 0.08    | 14.64   |
| Al K    | 52273  | 457   | 0.589  | 1.000  | 7.09    | 0.06    | 5.50    |
| Si K    | 158530 | 711   | 0.569  | 1.000  | 20.77   | 0.09    | 15.48   |
| K K     | 29208  | 322   | 0.552  | 1.000  | 3.71    | 0.04    | 1.99    |
| Ca K    | 8021   | 205   | 0.542  | 1.000  | 1.00    | 0.03    | 0.52    |
| Ti K    | 5170   | 159   | 0.608  | 1.000  | 0.72    | 0.02    | 0.32    |
| Fe K    | 23951  | 275   | 0.678  | 1.000  | 3.74    | 0.04    | 1.40    |
| Totals  |        |       |        |        | 100.00  |         |         |

Project: Project 1

Owner: INCA

Sample: CHG-4P-MW-No

Type: Default

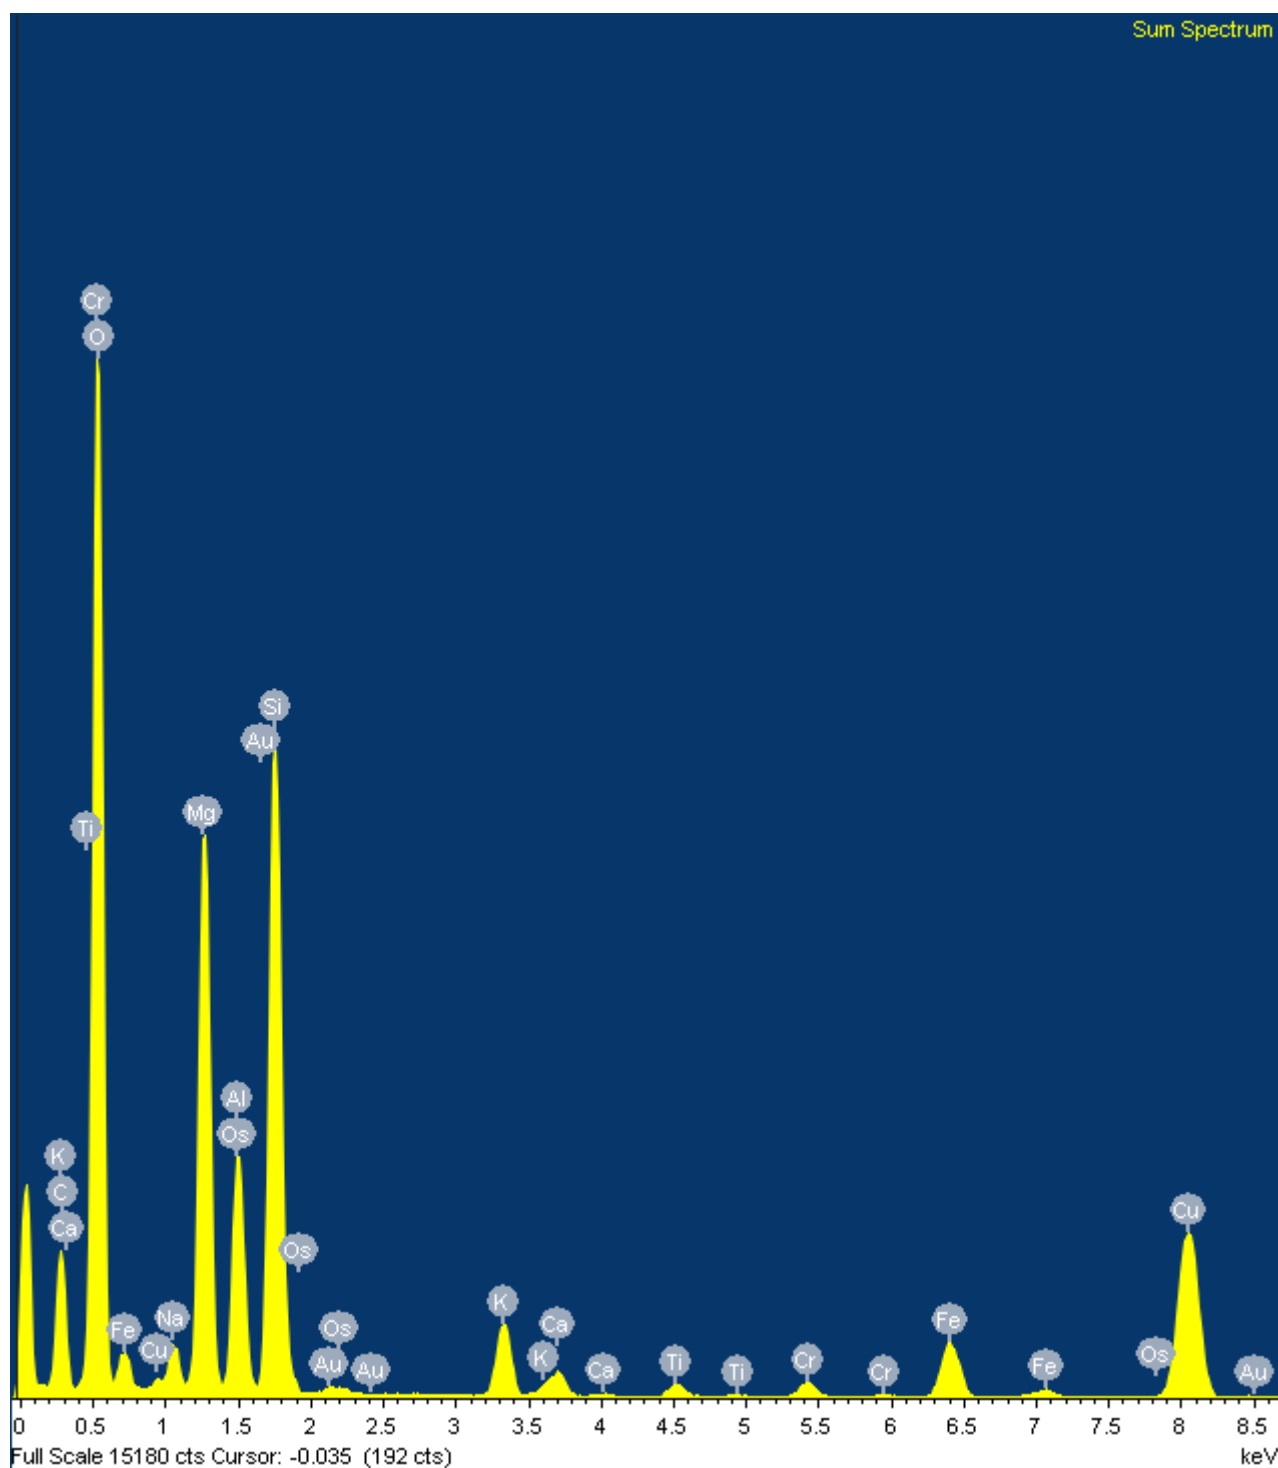

Comment:



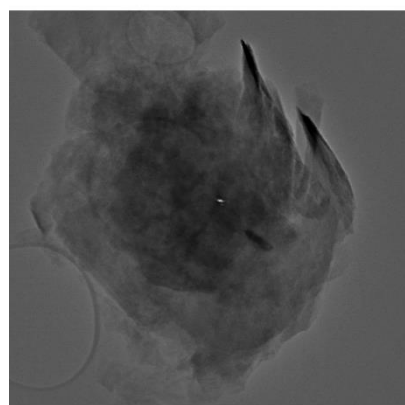

700nm Electron Image 1

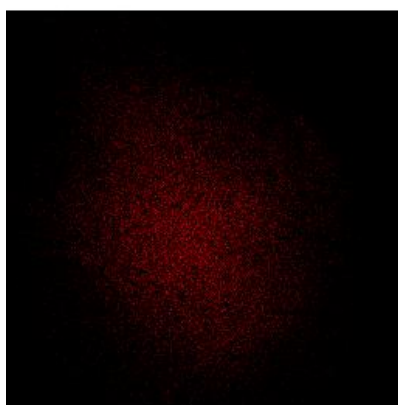

700nm O Ka1

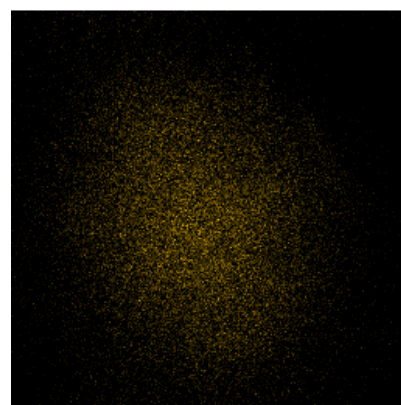

700nm Mg Ka1\_2

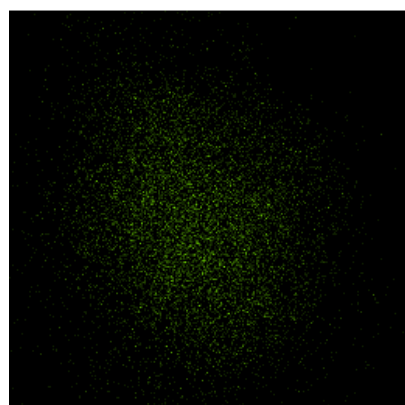

700nm Al Ka1

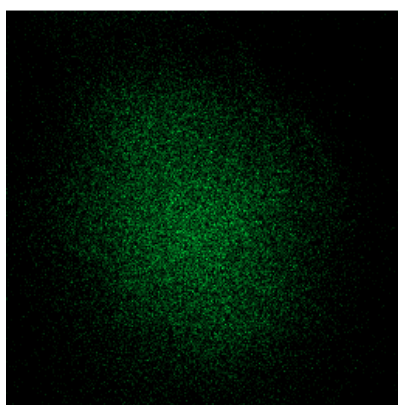

700nm Si Ka1

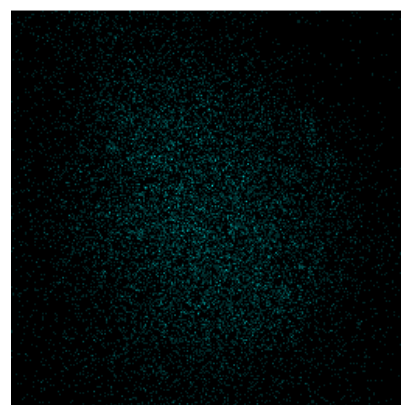

700nm K Ka1

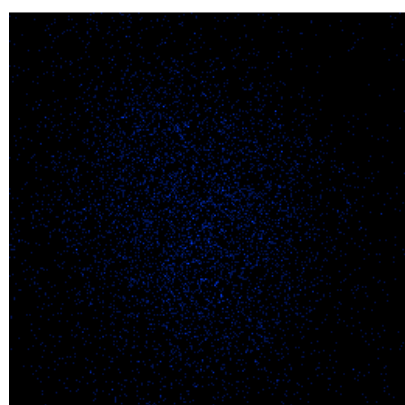

700nm Ca Ka1

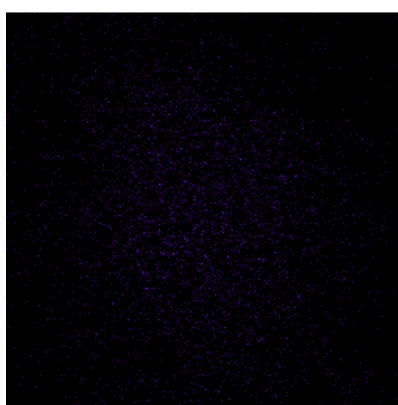

700nm Ti Ka1

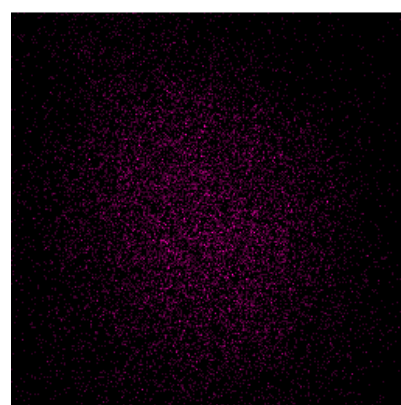

700nm Fe Ka1

Comment:



Project: Project 1

Owner: INCA

Sample: CHG-4P-MW-No

Type: Default

Label : Sum Spectrum

Collected : 15-May-2014 02:52 PM

Livetime (s) : 85.20

Real time (s) : 0.00

Detector : X-Max

Window : SATW

Tilt (deg) : 0.0

Elevation (deg) : 17.7

Azimuth (deg) : 0.0

Sample thickness: 0.0 nm

Sample density: 0.00 g/cm3

| Element | Peak   | Area  | k      | Abs    | Weight% | Weight% | Atomic% |
|---------|--------|-------|--------|--------|---------|---------|---------|
|         | Area   | Sigma | factor | Corrn. |         | Sigma   |         |
| O K     | 170700 | 761   | 1.065  | 1.000  | 48.13   | 0.14    | 62.04   |
| Mg K    | 105779 | 574   | 0.606  | 1.000  | 16.96   | 0.09    | 14.39   |
| Al K    | 44116  | 422   | 0.589  | 1.000  | 6.89    | 0.06    | 5.26    |
| Si K    | 132880 | 651   | 0.569  | 1.000  | 20.02   | 0.09    | 14.70   |
| K K     | 20232  | 272   | 0.552  | 1.000  | 2.96    | 0.04    | 1.56    |
| Ca K    | 6761   | 189   | 0.542  | 1.000  | 0.97    | 0.03    | 0.50    |
| Ti K    | 3770   | 143   | 0.608  | 1.000  | 0.61    | 0.02    | 0.26    |
| Fe K    | 19312  | 250   | 0.678  | 1.000  | 3.47    | 0.04    | 1.28    |
| Totals  |        |       |        |        | 100.00  |         |         |
