# Supplementary material for: Heterogeneous Distribution of Interlayer Cations and Iron as a Plausible Explanation of the Non-Exfoliation of Commercial Vermiculites Post Alcohol Treatment and Microwave Irradiation
Source: MDPI journal article supplement (doi:10.3390/min11080835), 2021-08-01
Supplement: s1 [file s1]

Project: Project 1

Owner: INCA

Sample: CHG-4M-MW-Ex

Type: Default

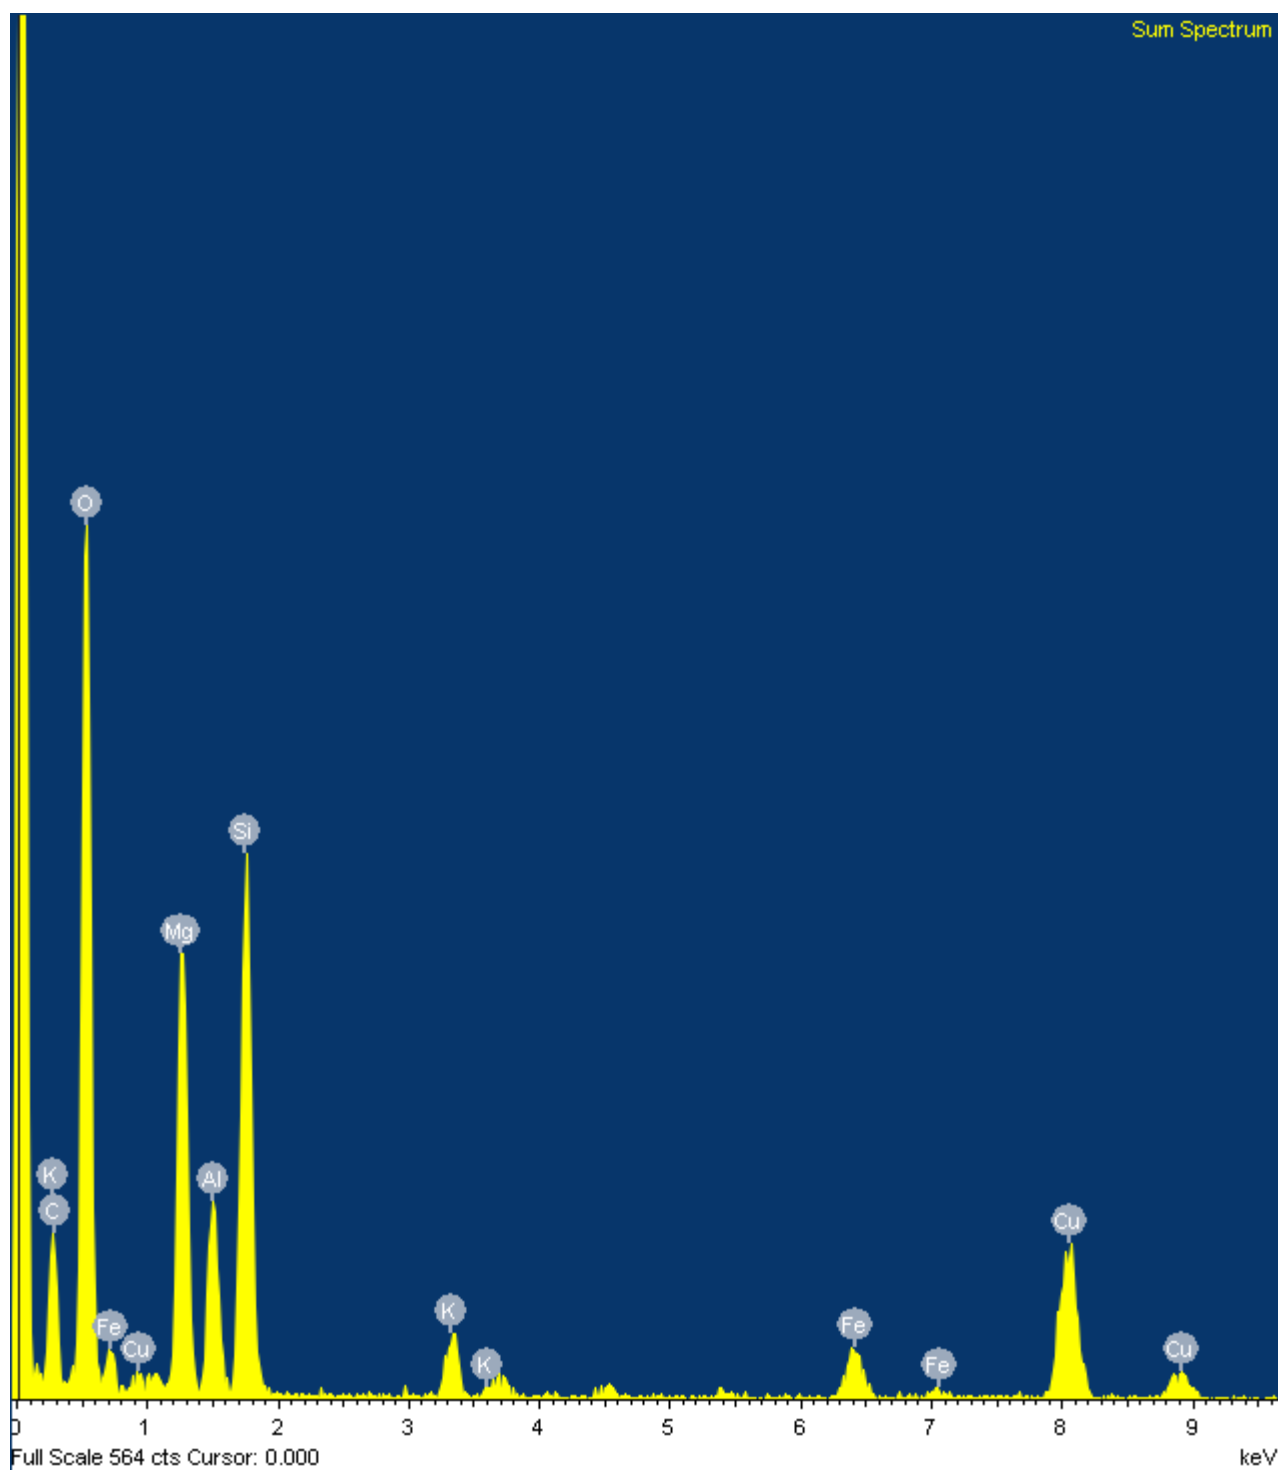

Comment:

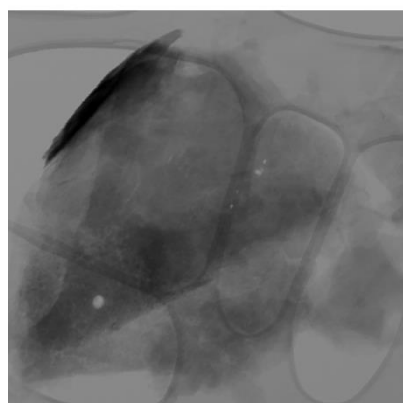

500nm Electron Image 1

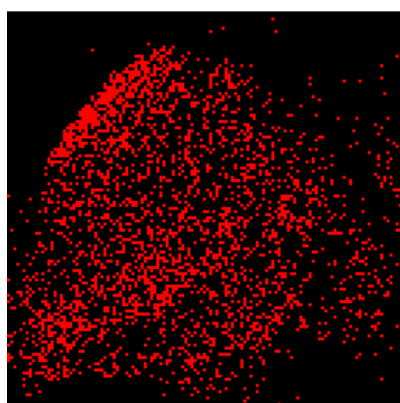

500nm O Ka1

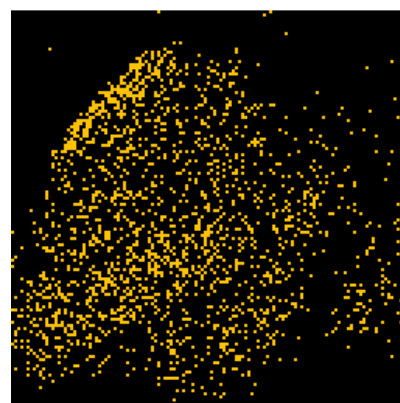

500nm Mg Ka1\_2

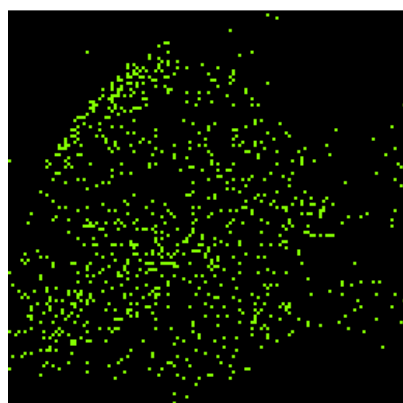

500nm Al Ka1

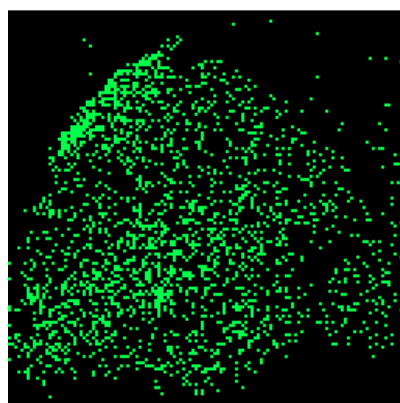

500nm Si Ka1

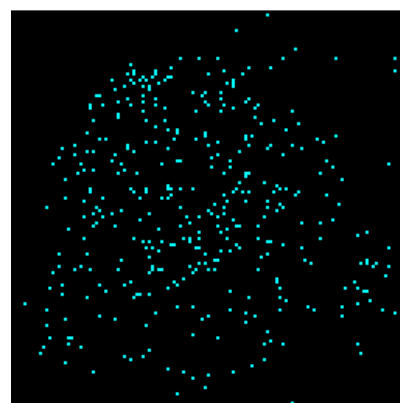

500nm K Ka1

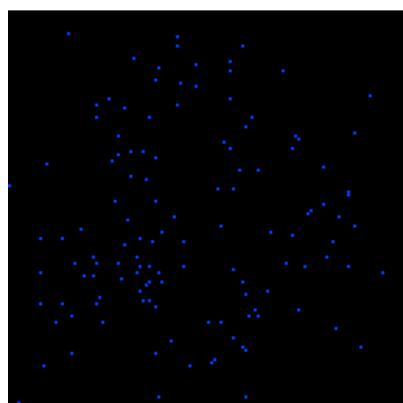

500nm Ca Ka1

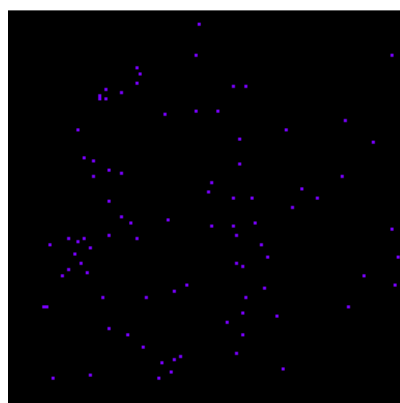

500nm Ti Ka1

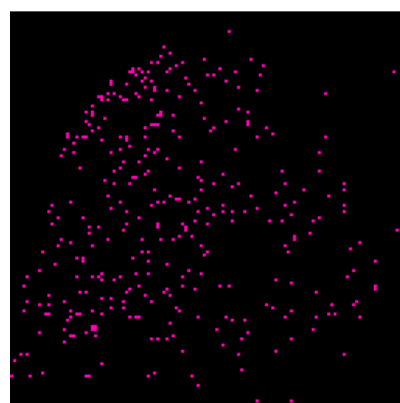

500nm Fe Ka1

Comment:

| Element | Peak | Area  | k      | Abs    | Weight% | Weight% | Atomic% |
|---------|------|-------|--------|--------|---------|---------|---------|
|         | Area | Sigma | factor | Corrn. |         | Sigma   |         |
| O K     | 5129 | 133   | 1.065  | 1.000  | 49.50   | 0.80    | 63.42   |
| Mg K    | 2976 | 97    | 0.606  | 1.000  | 16.33   | 0.51    | 13.77   |
| Al K    | 1281 | 72    | 0.589  | 1.000  | 6.84    | 0.37    | 5.20    |
| Si K    | 3709 | 109   | 0.569  | 1.000  | 19.13   | 0.54    | 13.96   |
| K K     | 618  | 46    | 0.552  | 1.000  | 3.09    | 0.23    | 1.62    |
| Ca K    | 165  | 30    | 0.542  | 1.000  | 0.81    | 0.15    | 0.41    |
| Ti K    | 127  | 24    | 0.608  | 1.000  | 0.70    | 0.13    | 0.30    |
| Fe K    | 586  | 43    | 0.678  | 1.000  | 3.60    | 0.26    | 1.32    |
| Totals  |      |       |        |        | 100.00  |         |         |

Project: Project 1

Owner: INCA

Sample: CHG-4M-MW-Ex

Type: Default

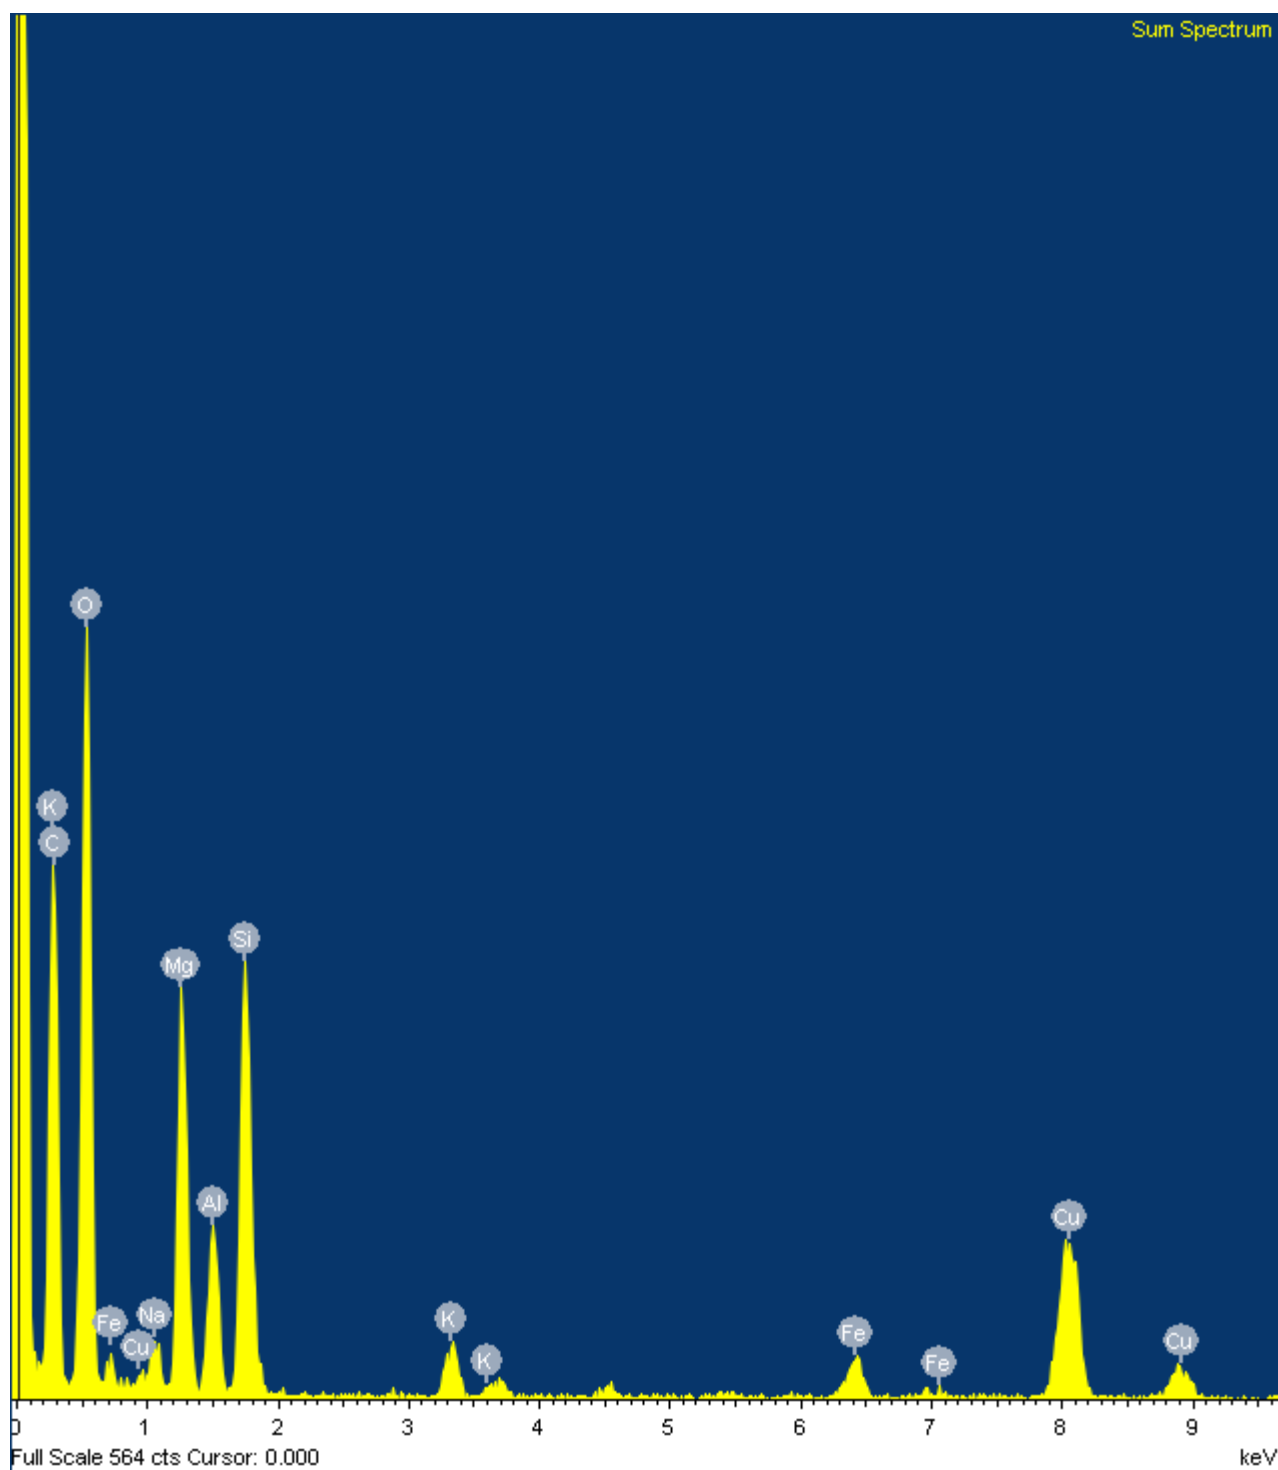

Comment:

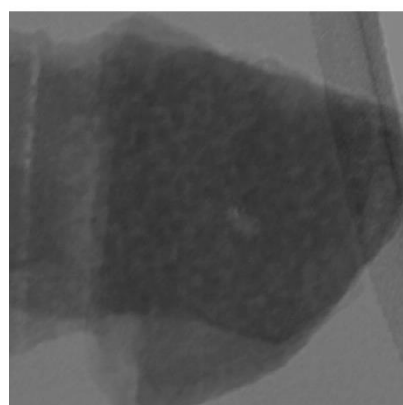

90nm Electron Image 1

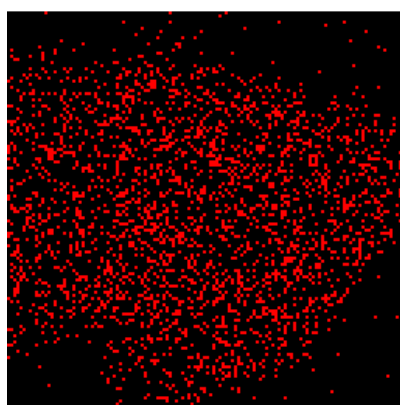

90nm O Ka1

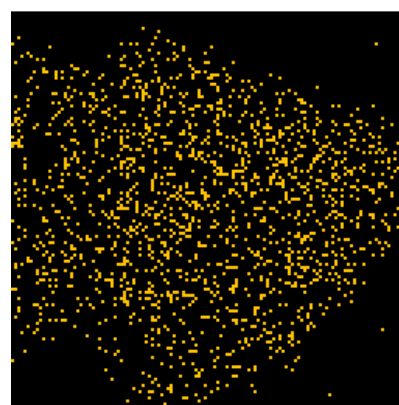

90nm Mg Ka1\_2

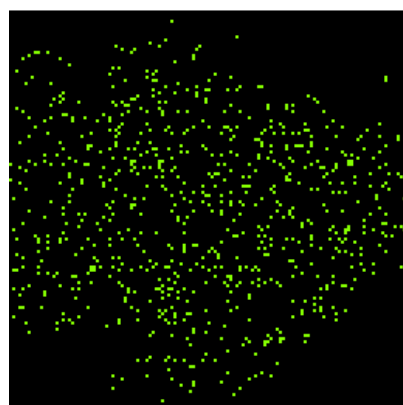

90nm Al Ka1

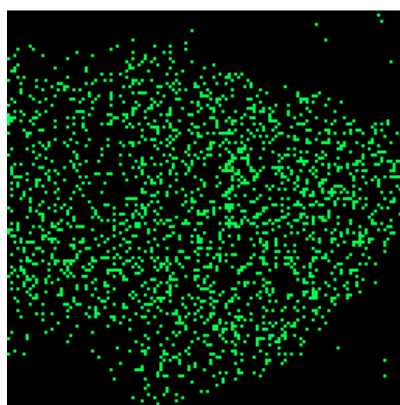

90nm Si Ka1

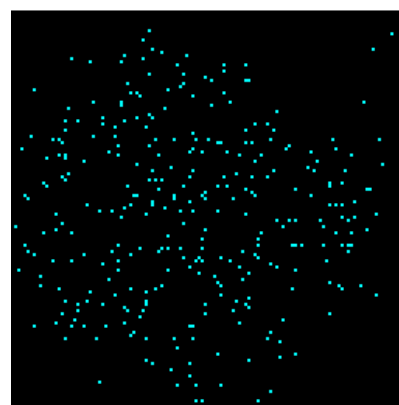

90nm K Ka1

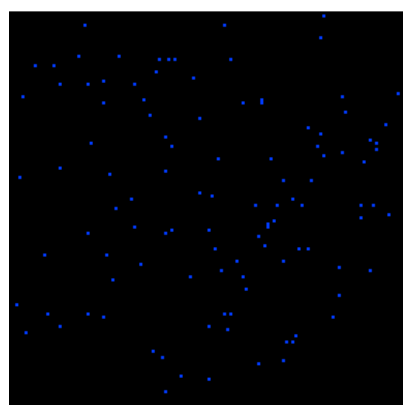

90nm Ca Ka1

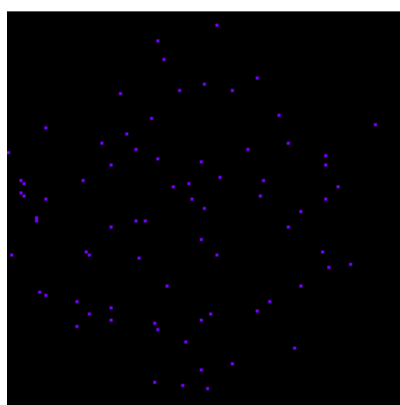

90nm Ti Ka1

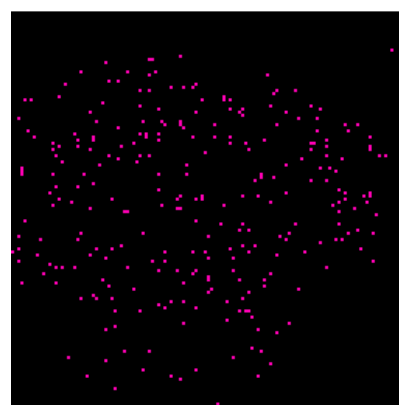

90nm Fe Ka1

Comment:

Project: Project 1

Owner: INCA

Sample: CHG-4M-MW-Ex

Type: Default

| Element | Peak | Area  | k      | Abs    | Weight% | Weight% | Atomic% |
|---------|------|-------|--------|--------|---------|---------|---------|
|         | Area | Sigma | factor | Corrn. |         | Sigma   |         |
| O K     | 4572 | 126   | 1.065  | 1.000  | 51.50   | 0.87    | 65.06   |
| Mg K    | 2534 | 89    | 0.606  | 1.000  | 16.23   | 0.55    | 13.50   |
| Al K    | 1066 | 66    | 0.589  | 1.000  | 6.65    | 0.40    | 4.98    |
| Si K    | 3073 | 99    | 0.569  | 1.000  | 18.50   | 0.57    | 13.32   |
| K K     | 485  | 42    | 0.552  | 1.000  | 2.83    | 0.24    | 1.46    |
| Ca K    | 118  | 28    | 0.542  | 1.000  | 0.68    | 0.16    | 0.34    |
| Ti K    | 92   | 23    | 0.608  | 1.000  | 0.59    | 0.15    | 0.25    |
| Fe K    | 420  | 38    | 0.678  | 1.000  | 3.01    | 0.27    | 1.09    |
| Totals  |      |       |        |        | 100.00  |         |         |

Project: Project 1

Owner: INCA

Sample: CHG-4M-MW-Ex

Type: Default

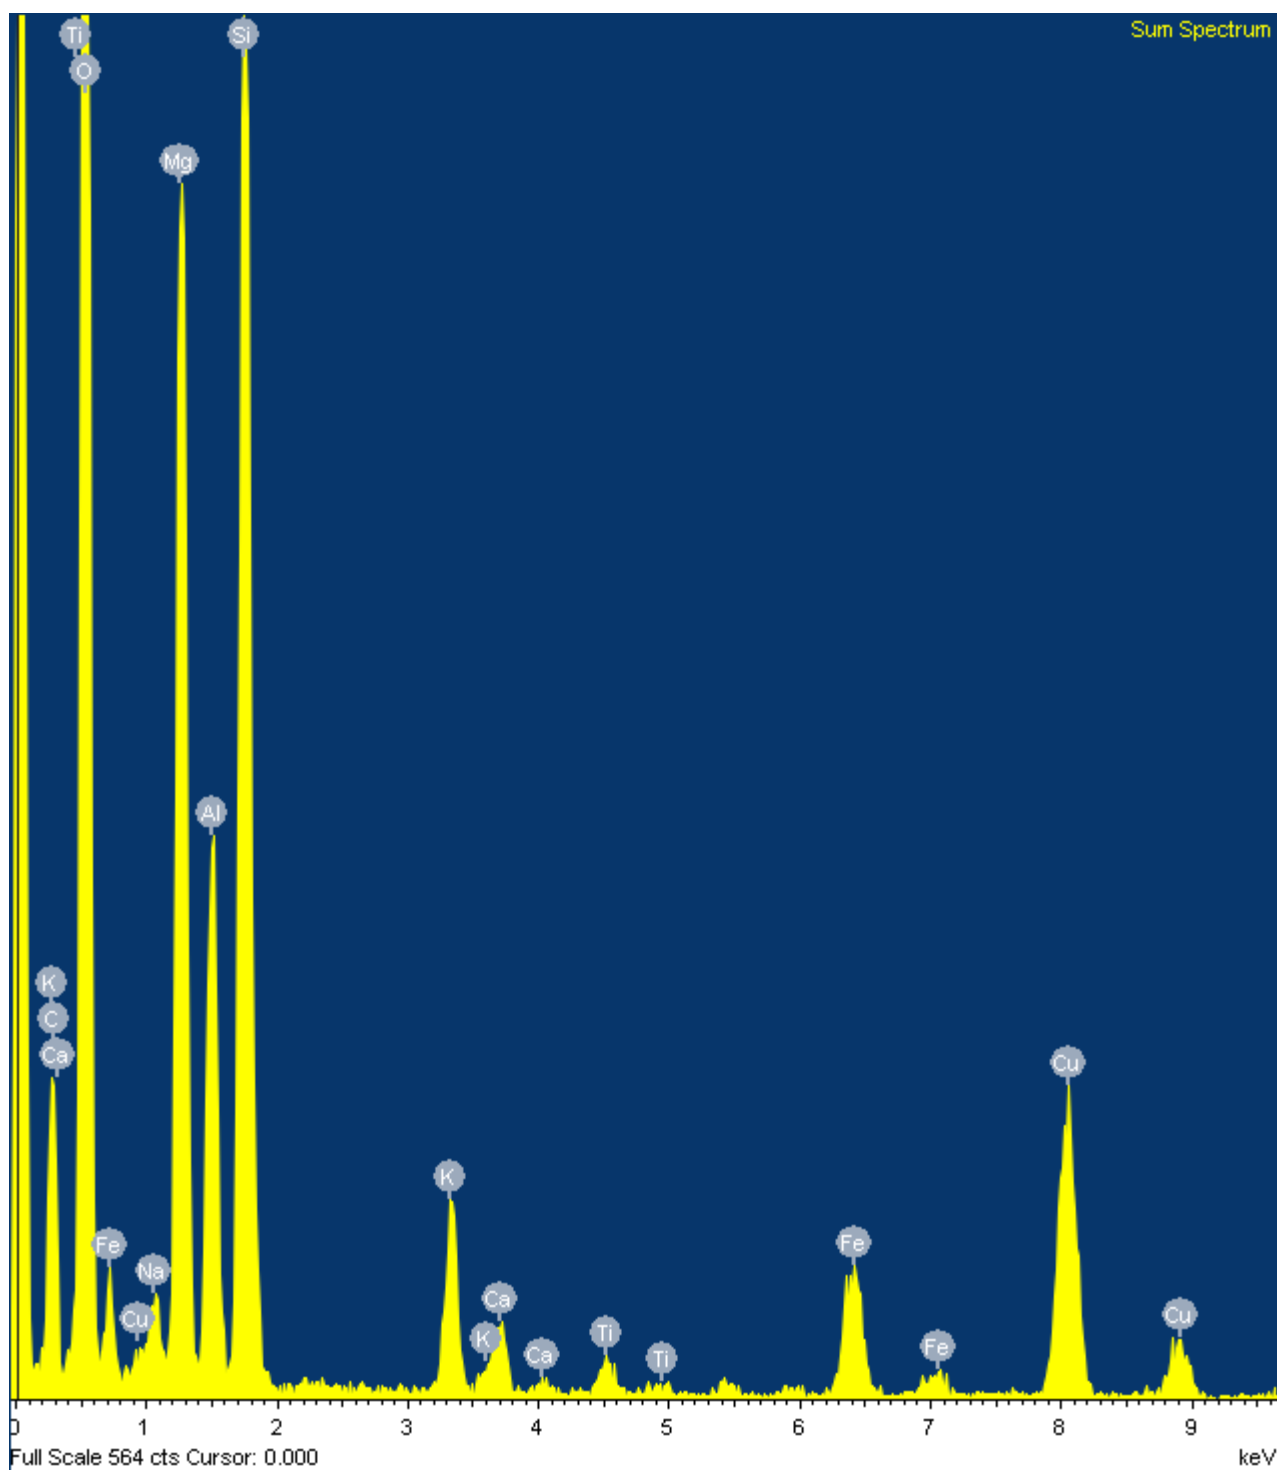

Comment:

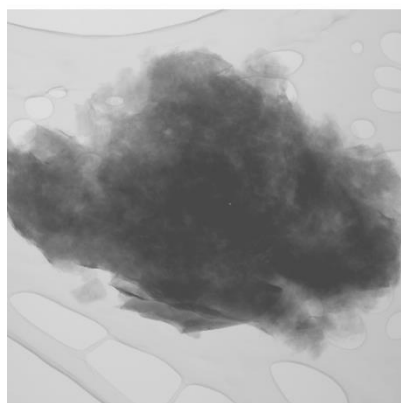

1µm

Electron Image 1

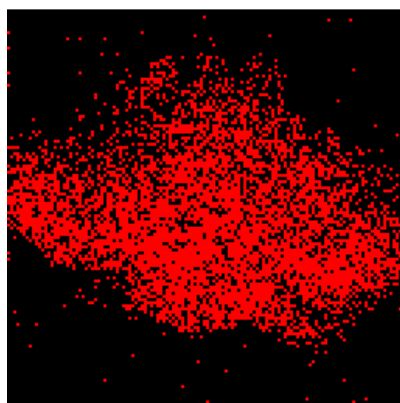

1µm

O Ka1

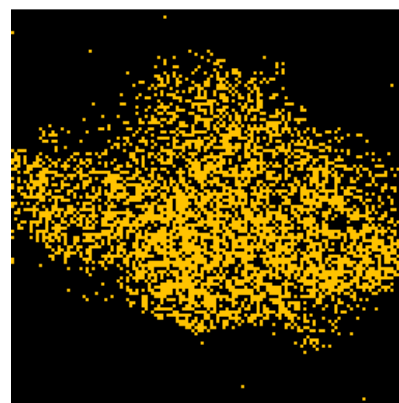

1µm

Mg Ka1\_2

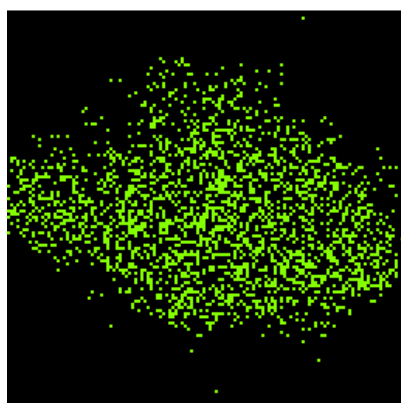

1µm

Al Ka1

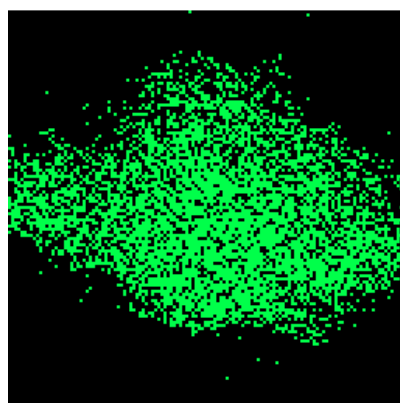

1µm

Si Ka1

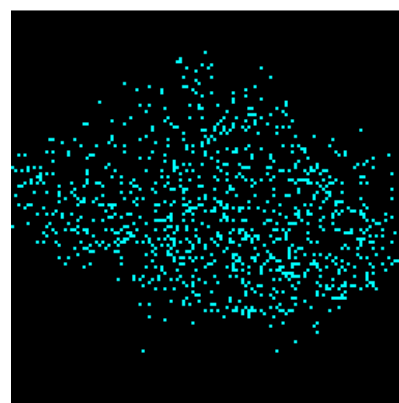

1µm

K Ka1

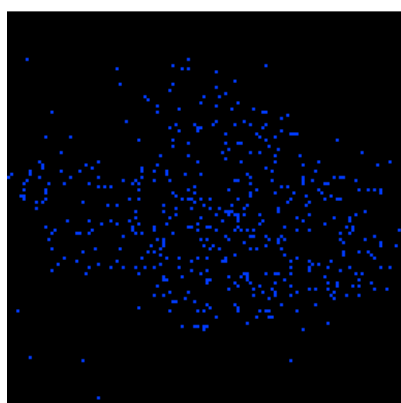

1µm

Ca Ka1

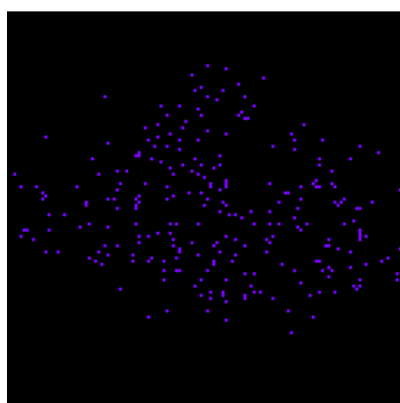

1µm

Ti Ka1

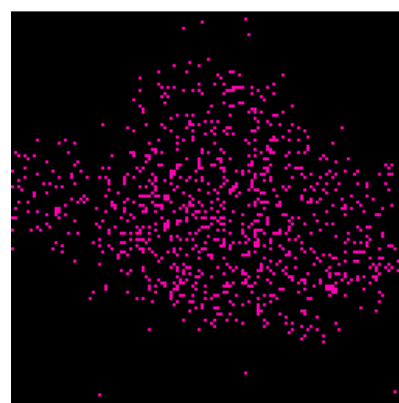

1µm

Fe Ka1

Comment:



Project: Project 1

Owner: INCA

Sample: CHG-4M-MW-Ex

Type: Default

| Element | Peak  | Area  | k      | Abs   | Weight% | Weight% | Atomic% |
|---------|-------|-------|--------|-------|---------|---------|---------|
|         | Area  | Sigma | factor | Corn. |         | Sigma   |         |
| O K     | 12883 | 208   | 1.065  | 1.000 | 46.17   | 0.49    | 60.29   |
| Mg K    | 8471  | 162   | 0.606  | 1.000 | 17.26   | 0.31    | 14.83   |
| Al K    | 3543  | 120   | 0.589  | 1.000 | 7.03    | 0.23    | 5.44    |
| Si K    | 10755 | 185   | 0.569  | 1.000 | 20.60   | 0.33    | 15.32   |
| K K     | 1806  | 78    | 0.552  | 1.000 | 3.36    | 0.14    | 1.79    |
| Ca K    | 702   | 56    | 0.542  | 1.000 | 1.28    | 0.10    | 0.67    |
| Ti K    | 371   | 43    | 0.608  | 1.000 | 0.76    | 0.09    | 0.33    |
| Fe K    | 1552  | 73    | 0.678  | 1.000 | 3.54    | 0.16    | 1.32    |
| Totals  |       |       |        |       | 100.00  |         |         |

Project: Project 1

Owner: INCA

Sample: CHG-4M-MW-Ex

Type: Default

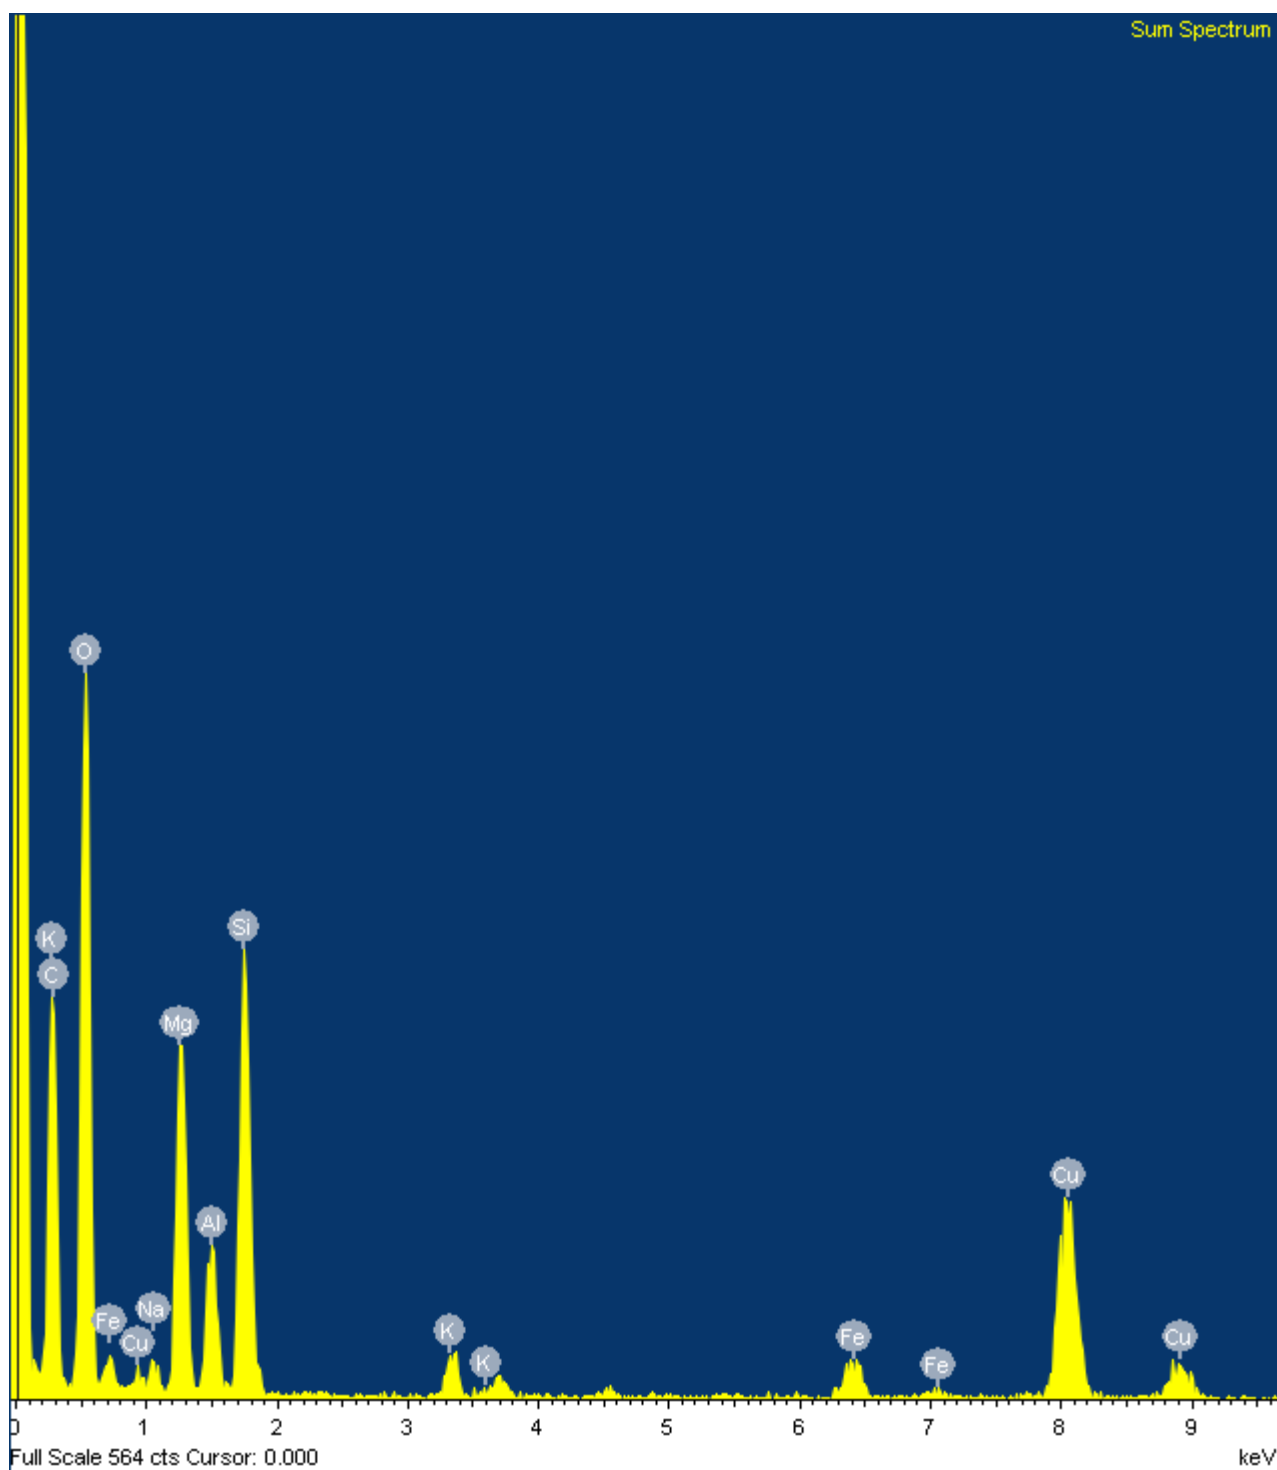

Comment:

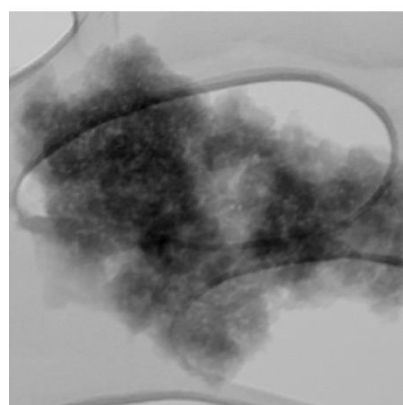

300nm Electron Image 1

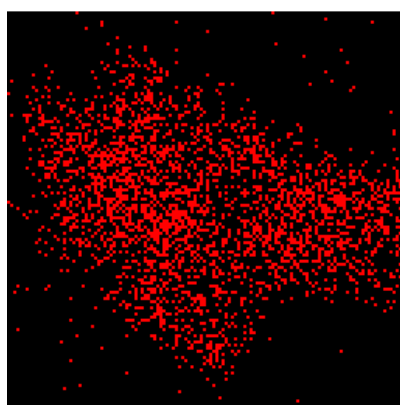

300nm O Ka1

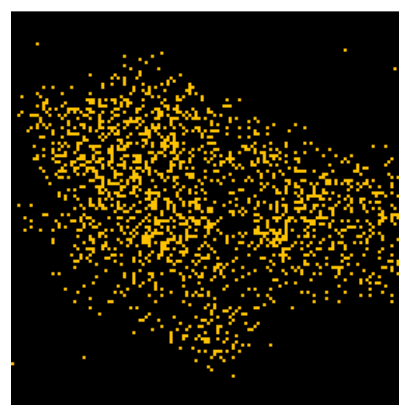

300nm Mg Ka1\_2

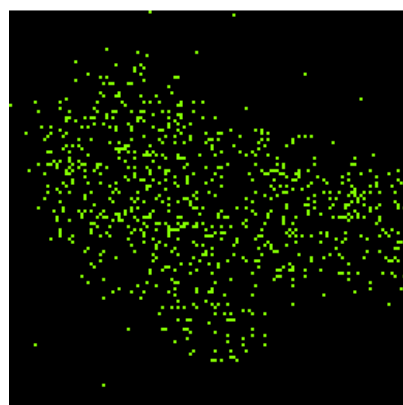

300nm Al Ka1

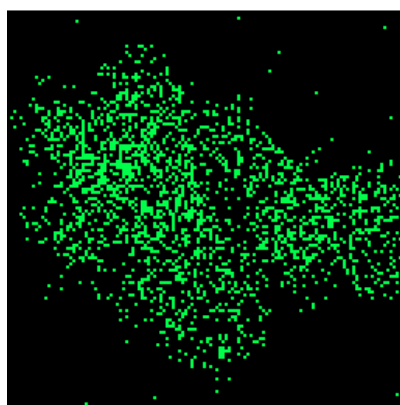

300nm Si Ka1

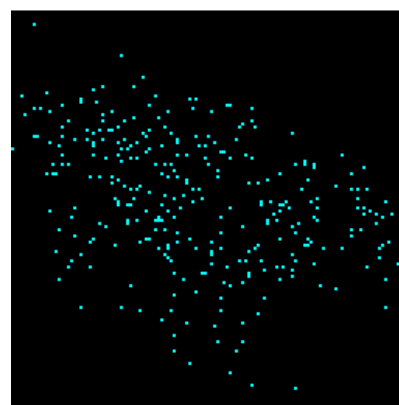

300nm K Ka1

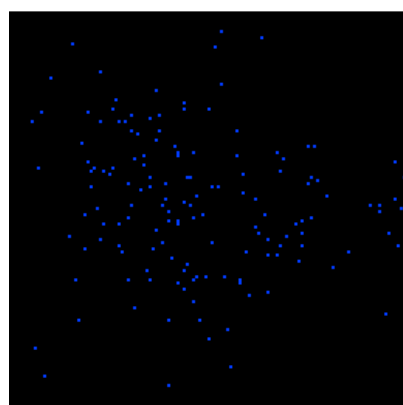

300nm Ca Ka1

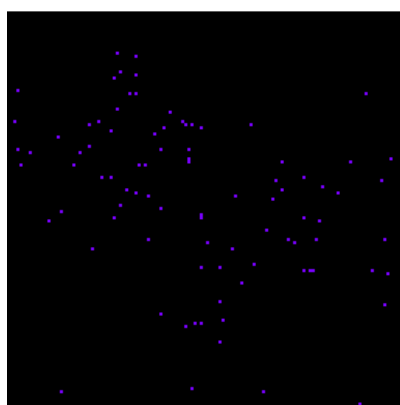

300nm Ti Ka1

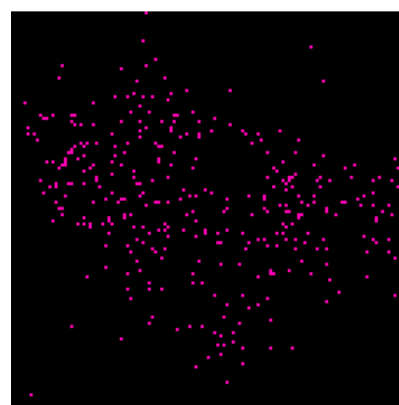

300nm Fe Ka1

Comment:

Project: Project 1

Owner: INCA

Sample: CHG-4M-MW-Ex

Type: Default

| Element | Peak | Area  | k      | Abs    | Weight% | Weight% | Atomic% |
|---------|------|-------|--------|--------|---------|---------|---------|
|         | Area | Sigma | factor | Corrn. |         | Sigma   |         |
| O K     | 4426 | 122   | 1.065  | 1.000  | 51.45   | 0.87    | 65.12   |
| Mg K    | 2441 | 87    | 0.606  | 1.000  | 16.13   | 0.55    | 13.44   |
| Al K    | 908  | 63    | 0.589  | 1.000  | 5.84    | 0.40    | 4.38    |
| Si K    | 3073 | 98    | 0.569  | 1.000  | 19.09   | 0.58    | 13.76   |
| K K     | 406  | 40    | 0.552  | 1.000  | 2.45    | 0.24    | 1.27    |
| Ca K    | 185  | 30    | 0.542  | 1.000  | 1.10    | 0.18    | 0.55    |
| Ti K    | 100  | 23    | 0.608  | 1.000  | 0.66    | 0.15    | 0.28    |
| Fe K    | 444  | 39    | 0.678  | 1.000  | 3.28    | 0.29    | 1.19    |
| Totals  |      |       |        |        | 100.00  |         |         |

Project: Project 1

Owner: INCA

Sample: CHG-4M-MW-Ex

Type: Default

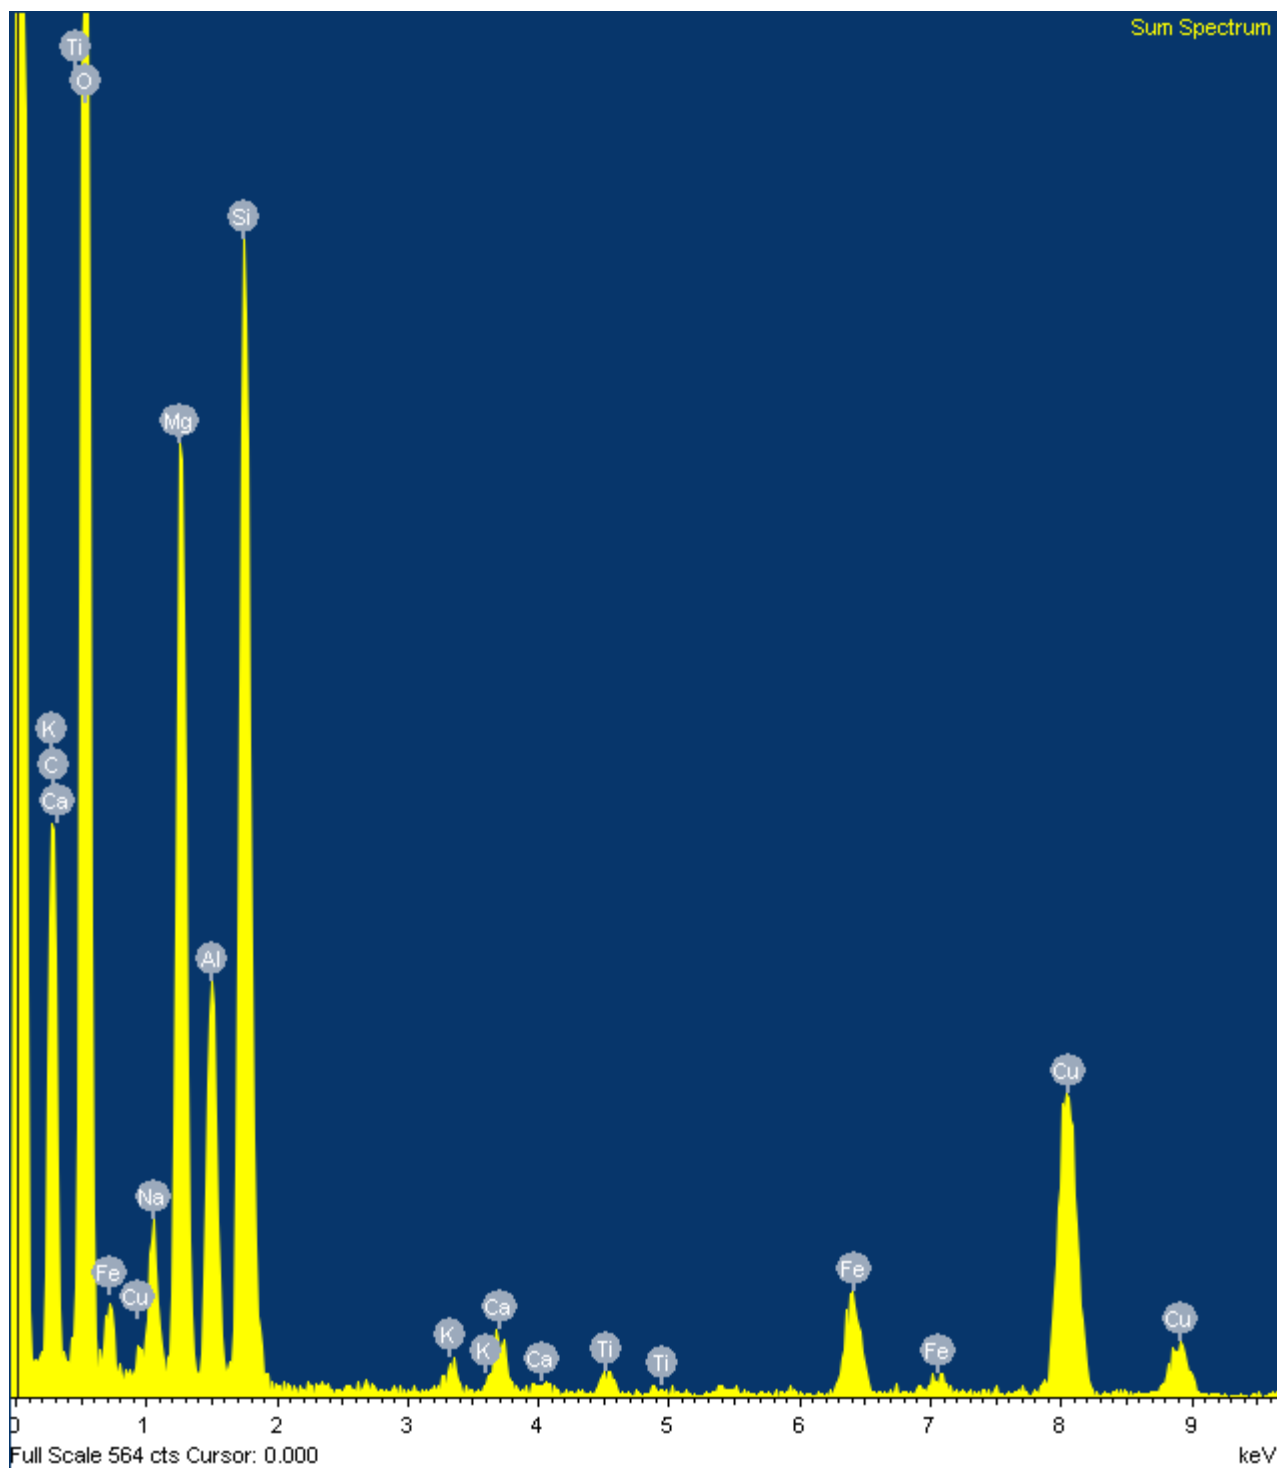

Comment:

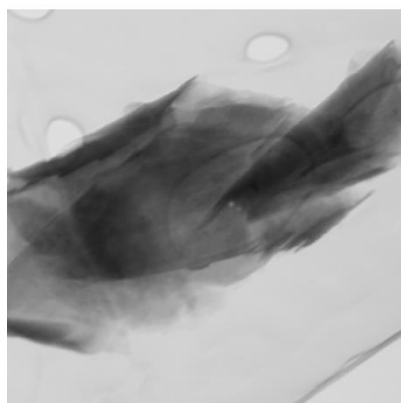

600nm Electron Image 1

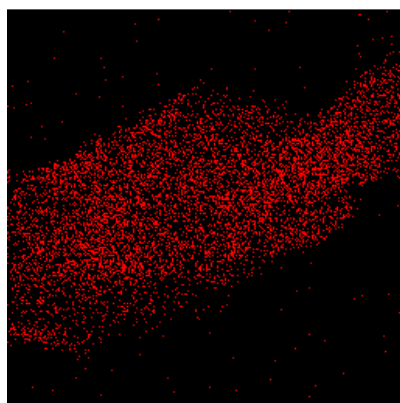

600nm O Ka1

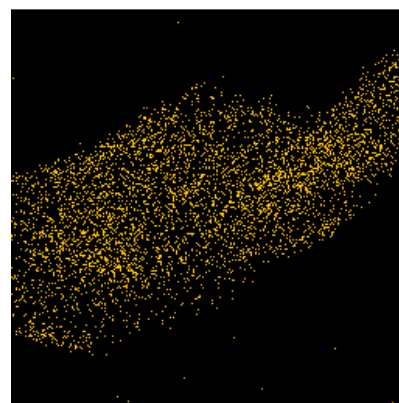

600nm Mg Ka1\_2

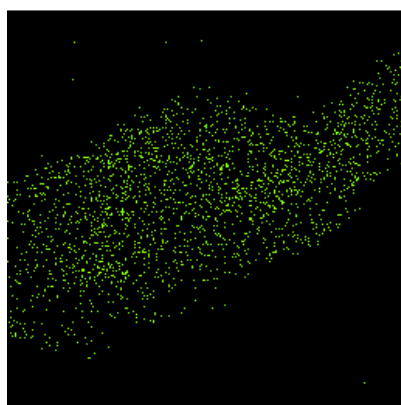

600nm Al Ka1

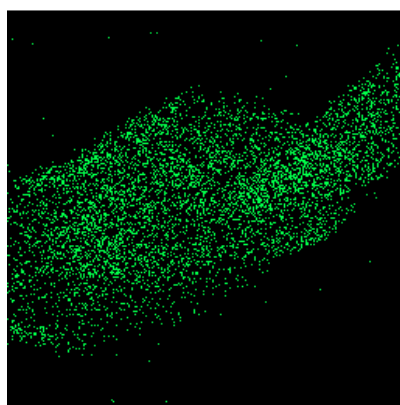

600nm Si Ka1

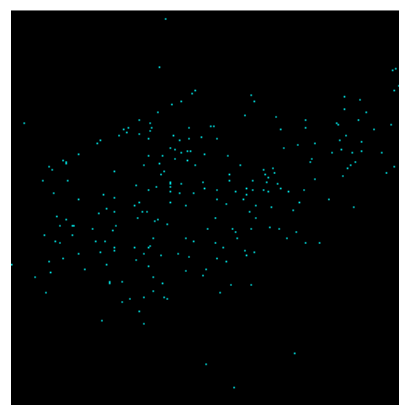

600nm K Ka1

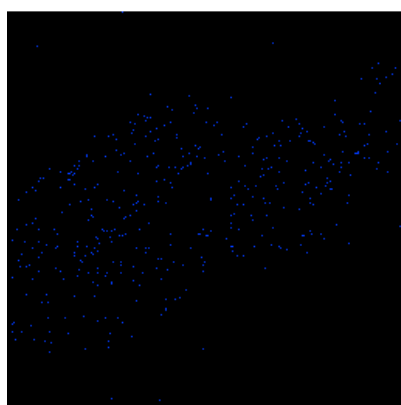

600nm Ca Ka1

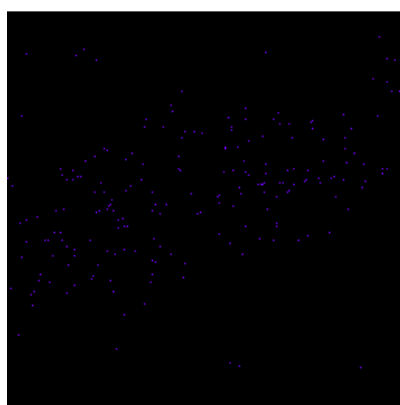

600nm Ti Ka1

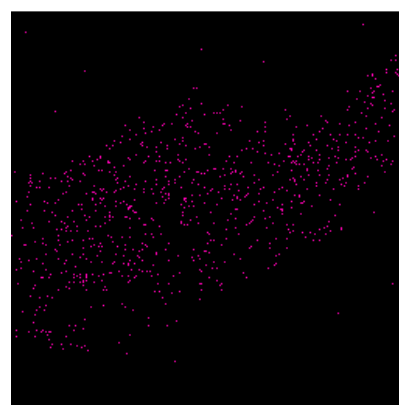

600nm Fe Ka1

Comment:

Project: Project 1

Owner: INCA

Sample: CHG-4M-MW-Ex

Type: Default

| Element | Peak  | Area  | k      | Abs   | Weight% | Weight% | Atomic% |
|---------|-------|-------|--------|-------|---------|---------|---------|
|         | Area  | Sigma | factor | Corn. |         | Sigma   |         |
| O K     | 11026 | 193   | 1.065  | 1.000 | 50.63   | 0.55    | 64.12   |
| Mg K    | 6393  | 140   | 0.606  | 1.000 | 16.69   | 0.35    | 13.91   |
| Al K    | 2677  | 103   | 0.589  | 1.000 | 6.80    | 0.25    | 5.11    |
| Si K    | 8156  | 162   | 0.569  | 1.000 | 20.01   | 0.38    | 14.44   |
| K K     | 245   | 38    | 0.552  | 1.000 | 0.58    | 0.09    | 0.30    |
| Ca K    | 511   | 48    | 0.542  | 1.000 | 1.19    | 0.11    | 0.60    |
| Ti K    | 239   | 33    | 0.608  | 1.000 | 0.63    | 0.09    | 0.26    |
| Fe K    | 1183  | 61    | 0.678  | 1.000 | 3.46    | 0.18    | 1.25    |
| Totals  |       |       |        |       | 100.00  |         |         |



Project: Project 1

Owner: INCA

Sample: CHG-4M-MW-Ex

Type: Default

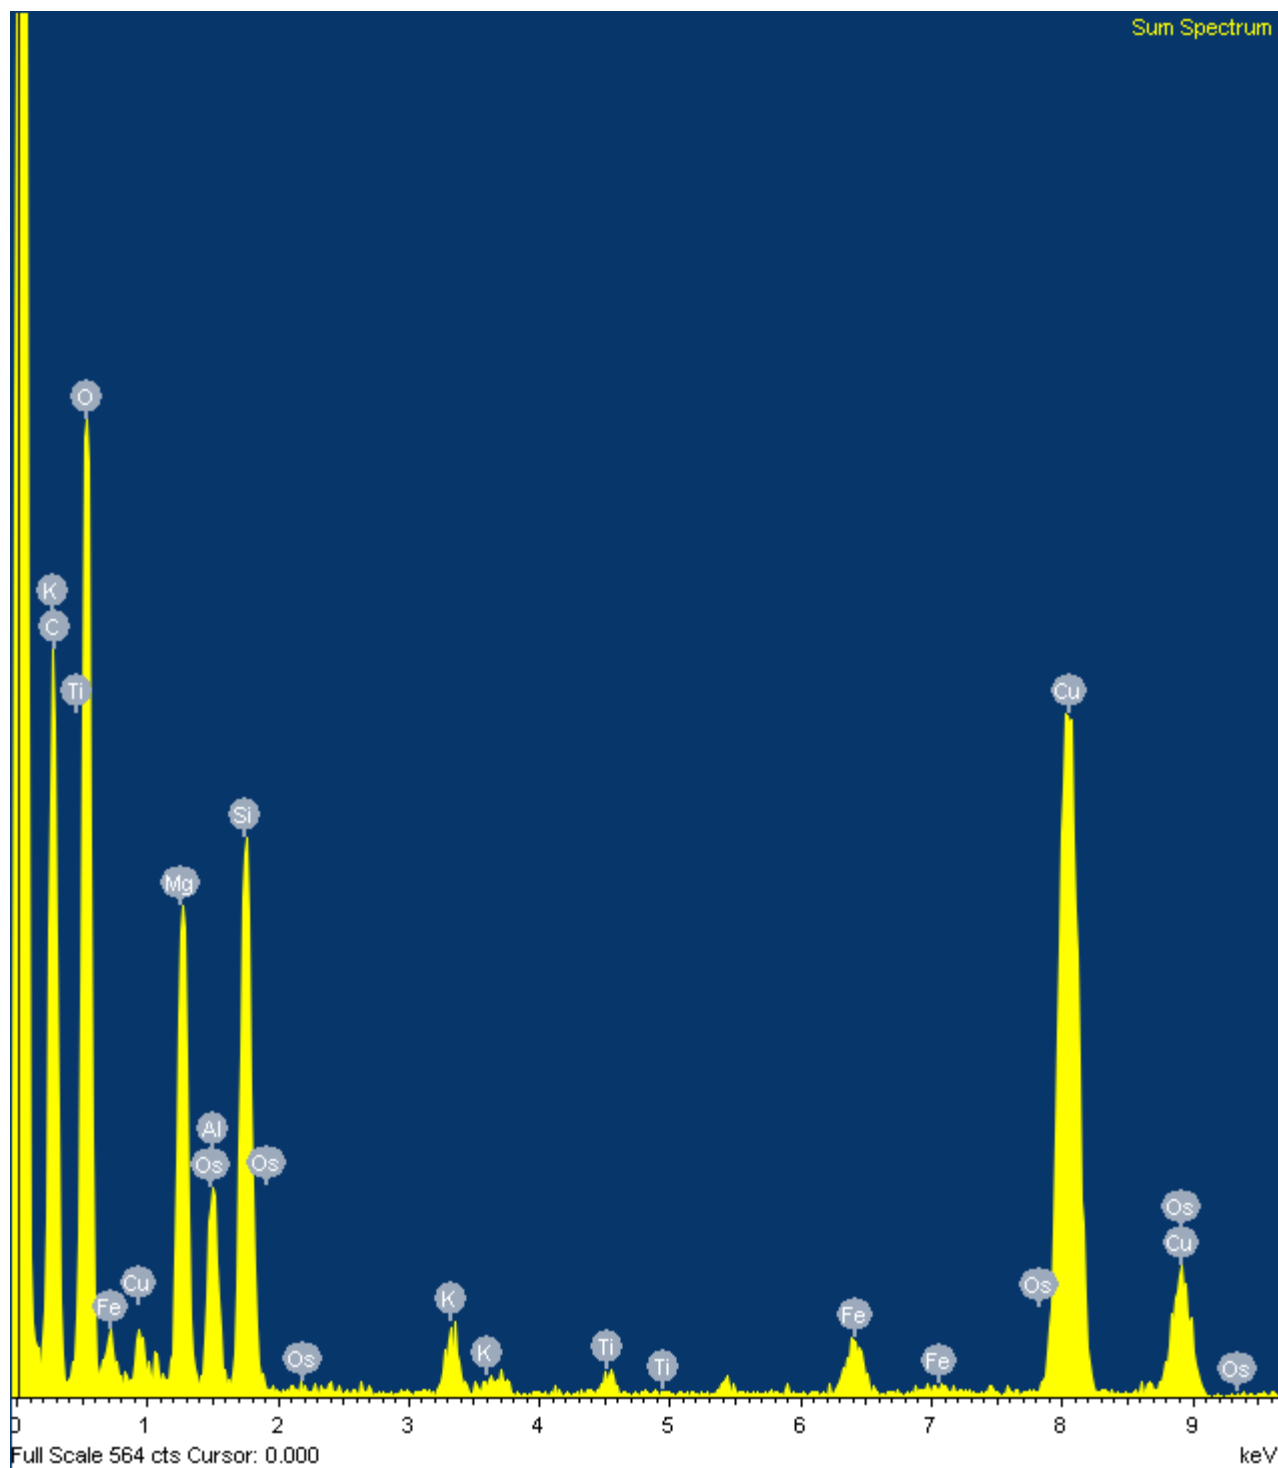

Comment:

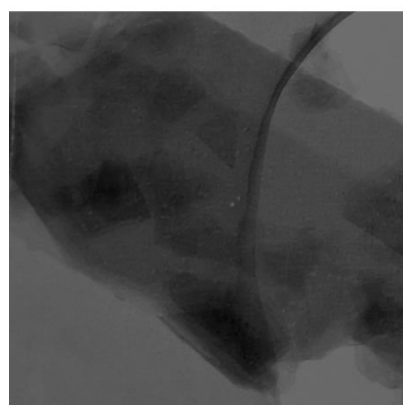

200nm

Electron Image 1

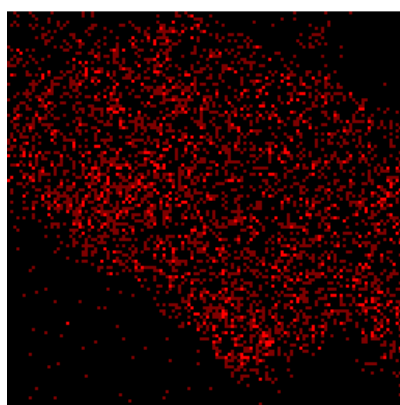

200nm

O Ka1

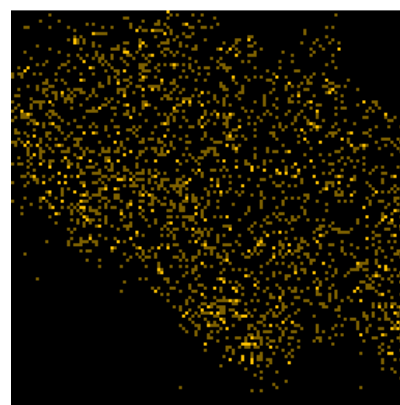

200nm

Mg Ka1\_2

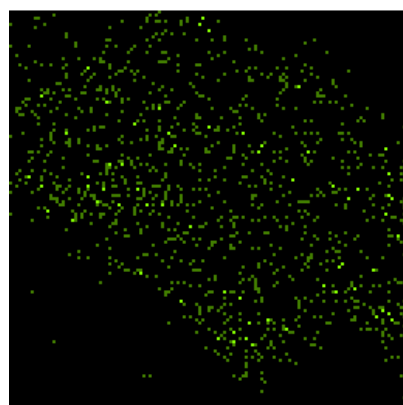

200nm

Al Ka1

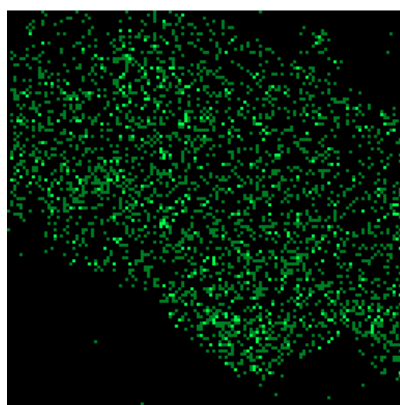

200nm

Si Ka1

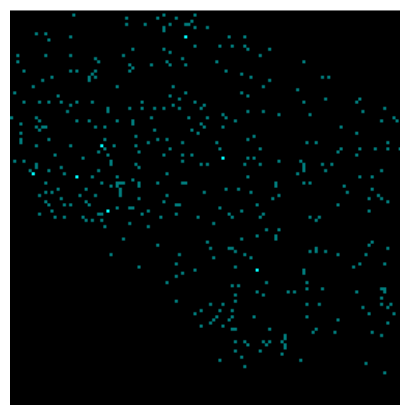

200nm

K Ka1

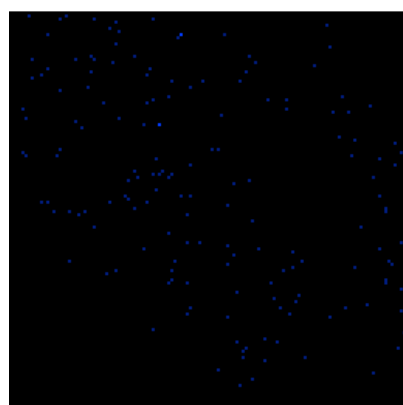

200nm

Ca Ka1

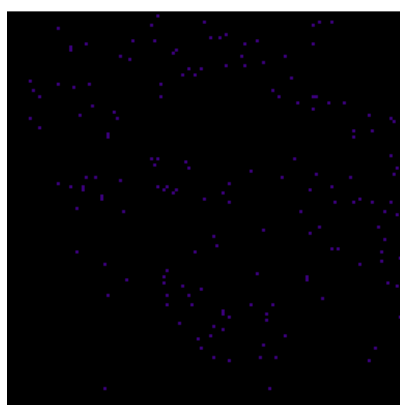

200nm

Ti Ka1

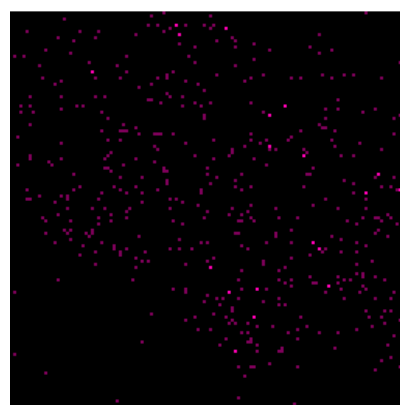

200nm

Fe Ka1

Comment:

Project: Project 1

Owner: INCA

Sample: CHG-4M-MW-Ex

Type: Default

| Element | Peak | Area  | k      | Abs    | Weight% | Weight% | Atomic% |
|---------|------|-------|--------|--------|---------|---------|---------|
|         | Area | Sigma | factor | Corrn. |         | Sigma   |         |
| O K     | 6166 | 147   | 1.065  | 1.000  | 51.80   | 0.75    | 65.43   |
| Mg K    | 3349 | 101   | 0.606  | 1.000  | 16.00   | 0.47    | 13.30   |
| Al K    | 1367 | 75    | 0.589  | 1.000  | 6.36    | 0.34    | 4.76    |
| Si K    | 4123 | 115   | 0.569  | 1.000  | 18.51   | 0.50    | 13.32   |
| K K     | 568  | 49    | 0.552  | 1.000  | 2.48    | 0.21    | 1.28    |
| Ca K    | 168  | 32    | 0.542  | 1.000  | 0.72    | 0.14    | 0.36    |
| Ti K    | 189  | 31    | 0.608  | 1.000  | 0.91    | 0.15    | 0.38    |
| Fe K    | 604  | 50    | 0.678  | 1.000  | 3.23    | 0.26    | 1.17    |
| Totals  |      |       |        |        | 100.00  |         |         |
