# Supplementary material for: Heterogeneous Distribution of Interlayer Cations and Iron as a Plausible Explanation of the Non-Exfoliation of Commercial Vermiculites Post Alcohol Treatment and Microwave Irradiation
Source: MDPI journal article supplement (doi:10.3390/min11080835), 2021-08-01
Supplement: s1 [file s1]

Project: Project 1

Owner: INCA

Sample: CHG-4P-MW-Ex

Type: Default

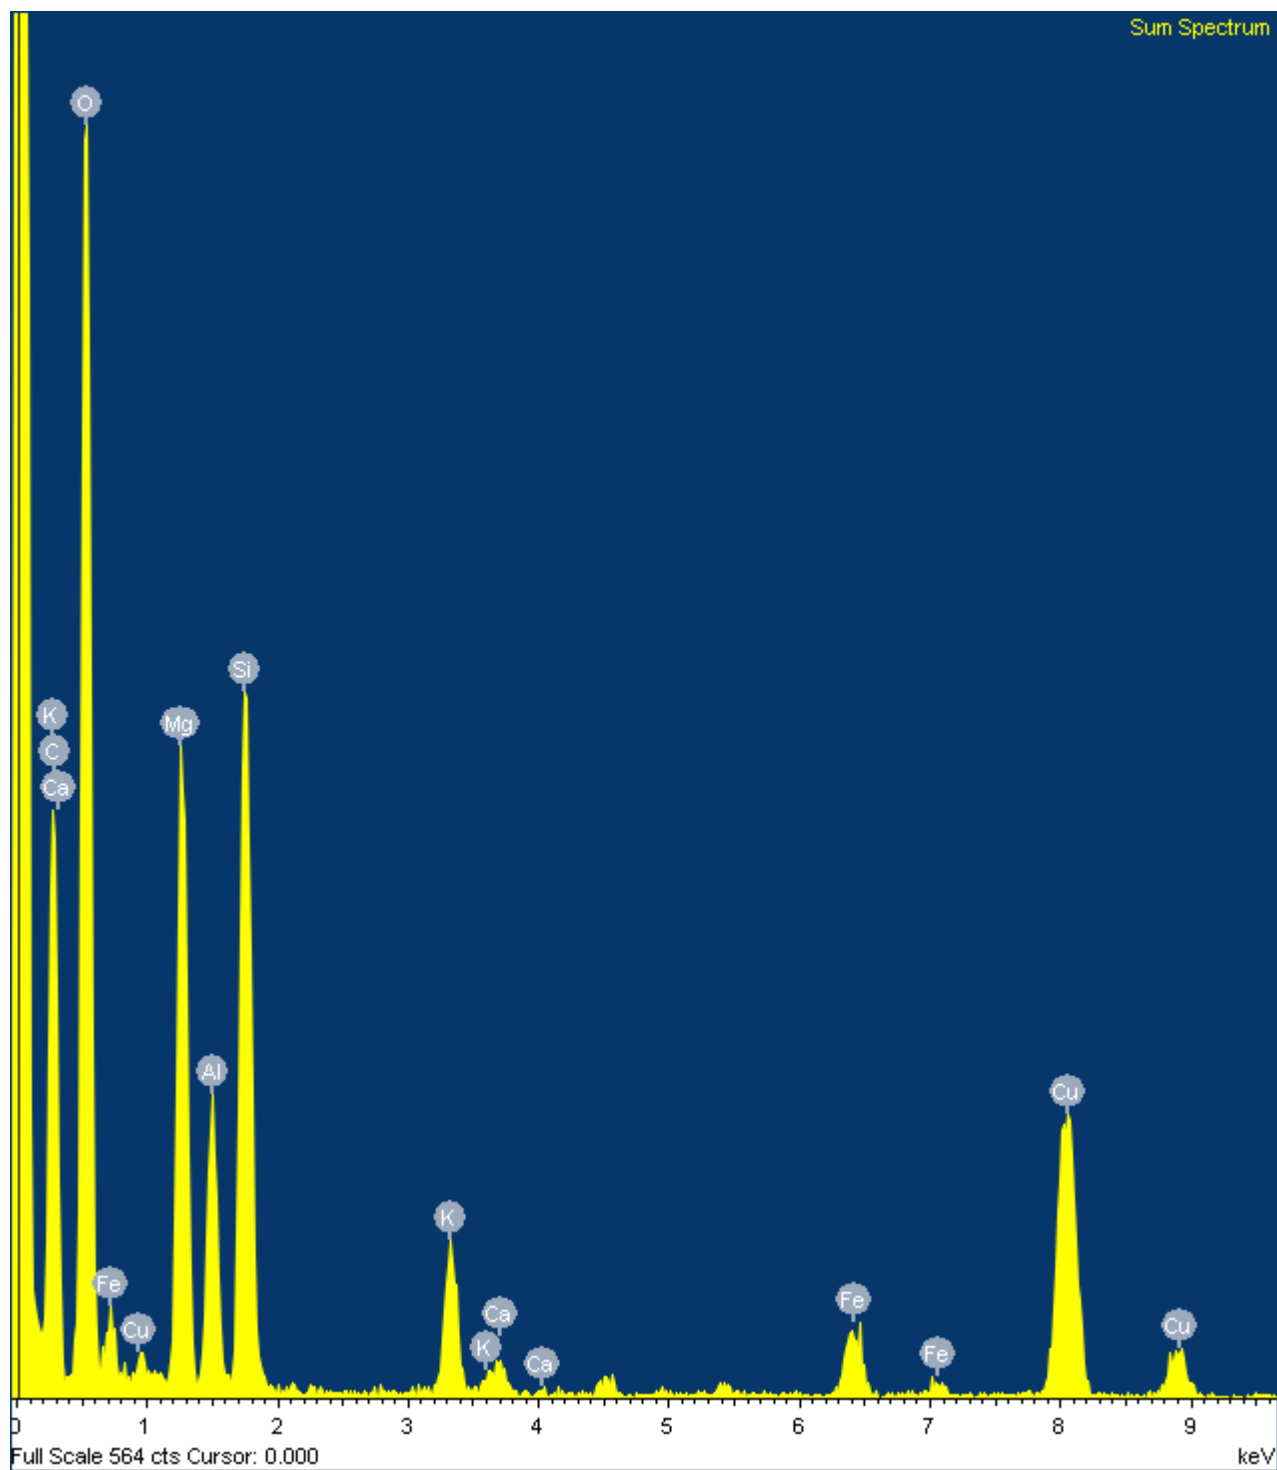

Comment:

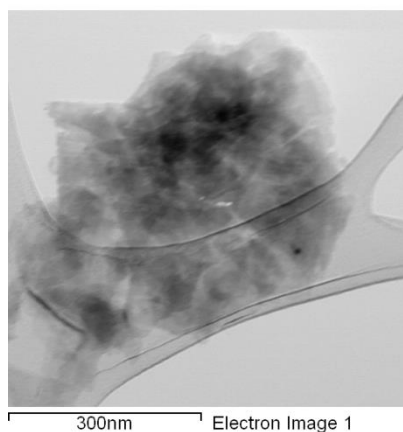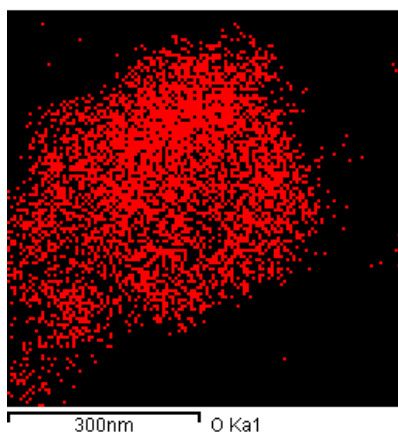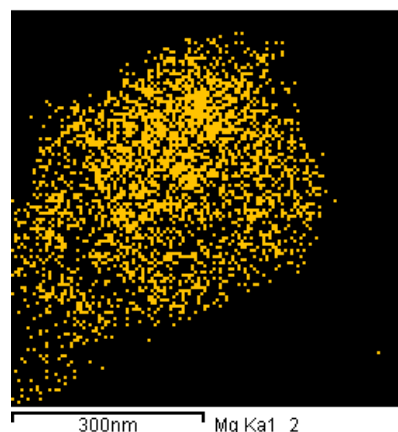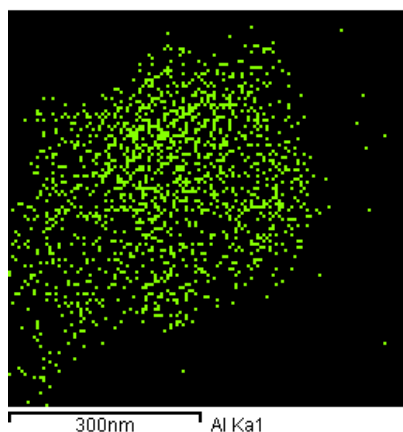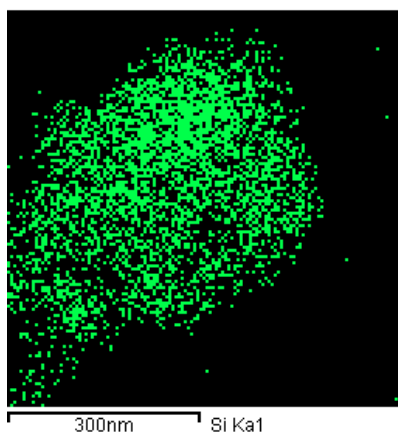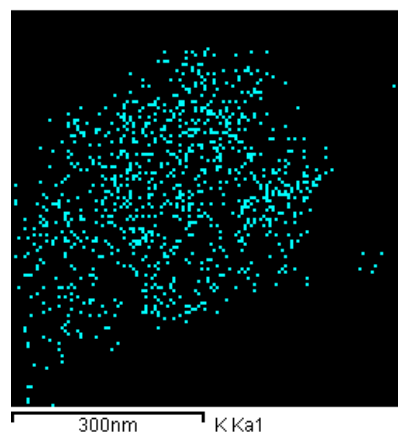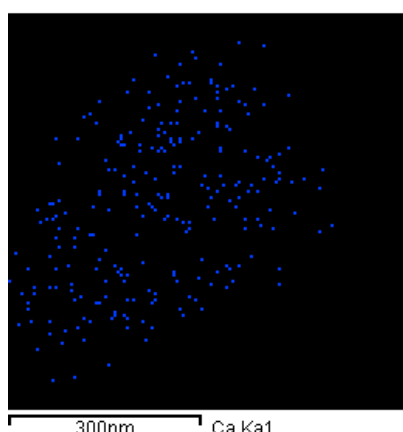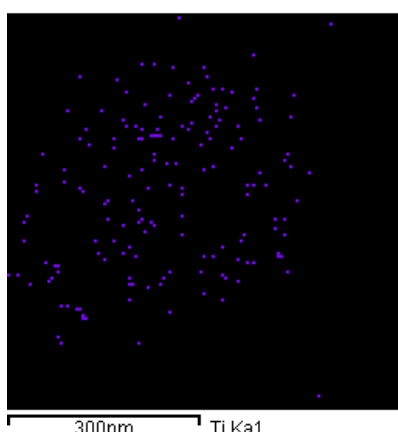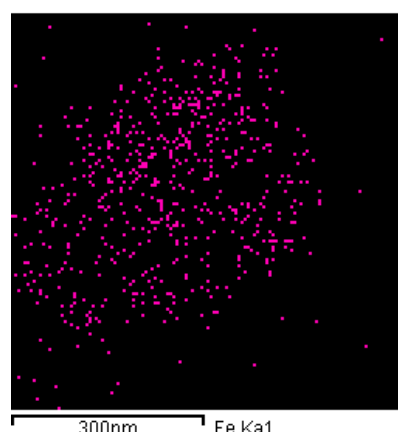

Comment:

Project: Project 1

Owner: INCA

Sample: CHG-4P-MW-Ex

Type: Default

| Element | Peak | Area  | k      | Abs    | Weight% | Weight% | Atomic% |
|---------|------|-------|--------|--------|---------|---------|---------|
|         | Area | Sigma | factor | Corrn. |         | Sigma   |         |
| O K     | 7910 | 166   | 1.065  | 1.000  | 50.46   | 0.65    | 64.51   |
| Mg K    | 4254 | 115   | 0.606  | 1.000  | 15.43   | 0.40    | 12.98   |
| Al K    | 1839 | 86    | 0.589  | 1.000  | 6.49    | 0.29    | 4.92    |
| Si K    | 5341 | 130   | 0.569  | 1.000  | 18.21   | 0.43    | 13.26   |
| K K     | 1379 | 68    | 0.552  | 1.000  | 4.56    | 0.22    | 2.38    |
| Ca K    | 264  | 39    | 0.542  | 1.000  | 0.86    | 0.13    | 0.44    |
| Ti K    | 190  | 31    | 0.608  | 1.000  | 0.69    | 0.11    | 0.29    |
| Fe K    | 814  | 52    | 0.678  | 1.000  | 3.31    | 0.21    | 1.21    |
| Totals  |      |       |        |        | 100.00  |         |         |

Project: Project 1

Owner: INCA

Sample: CHG-4P-MW-Ex

Type: Default

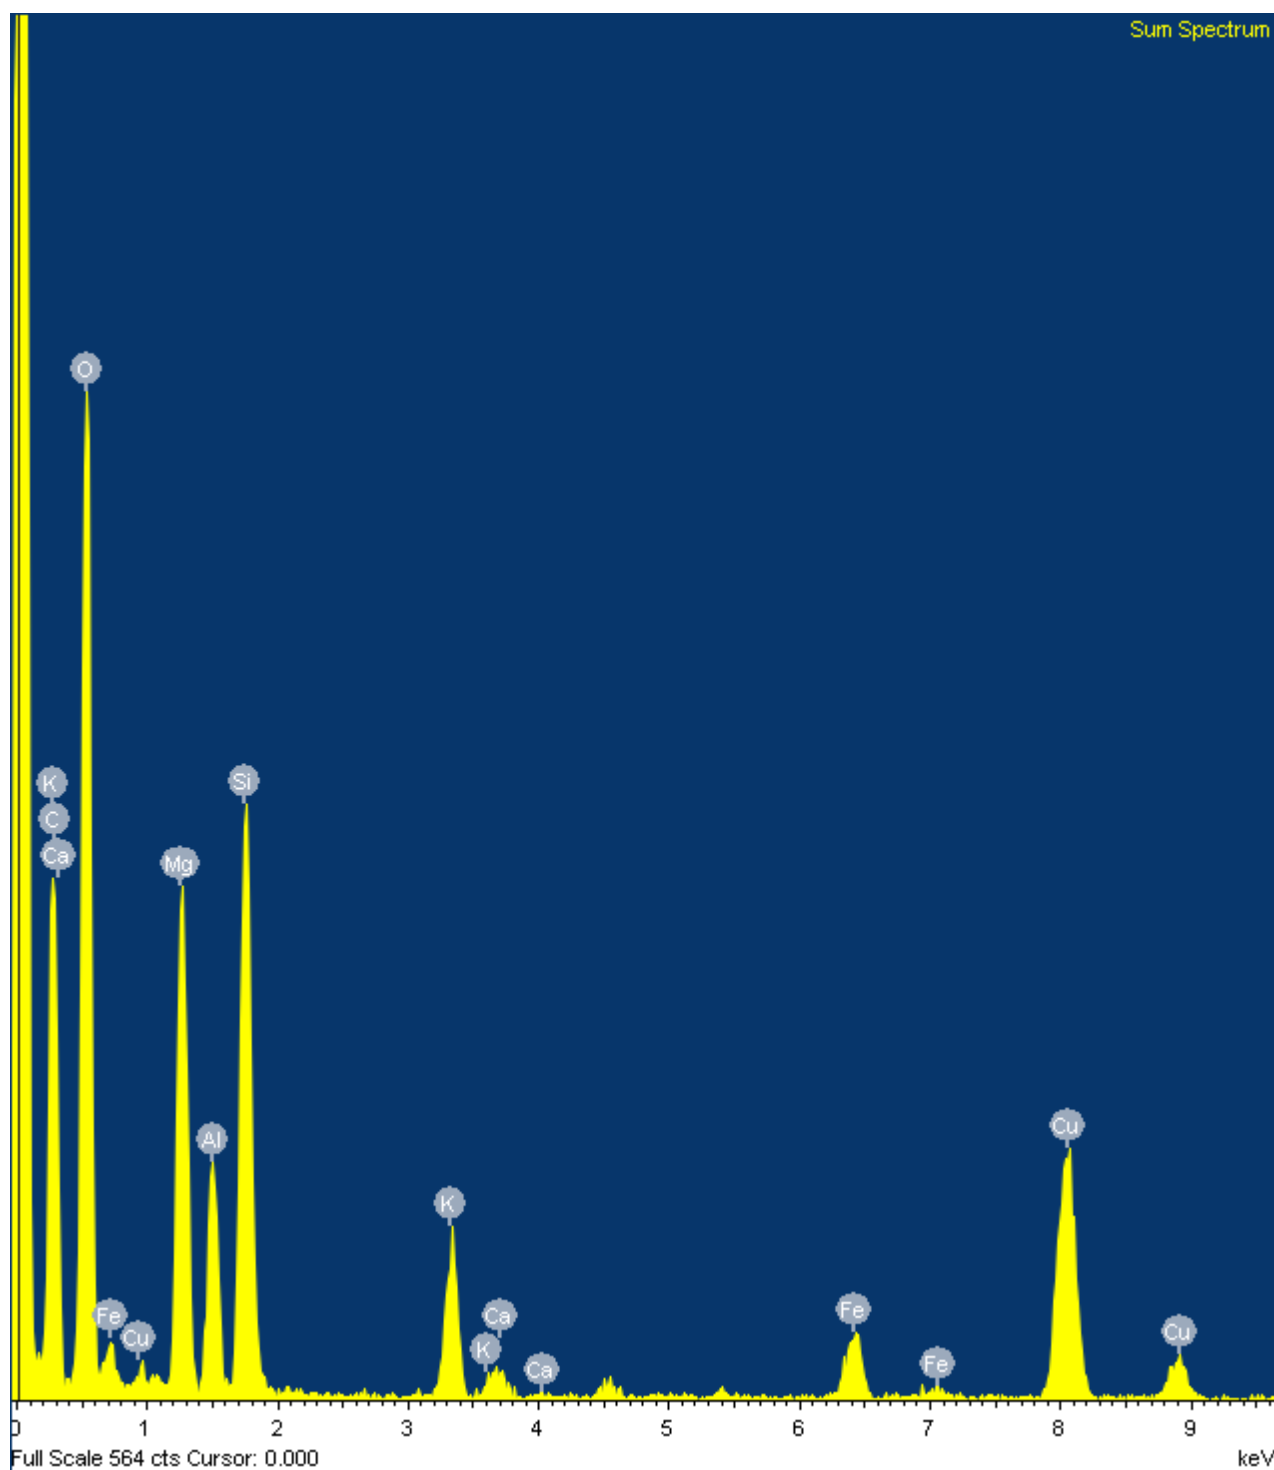

Comment:

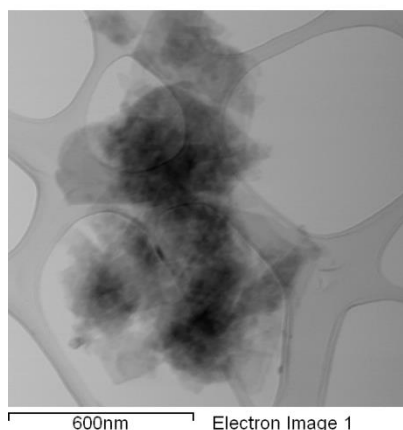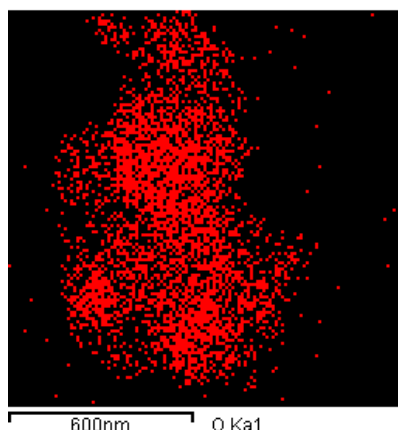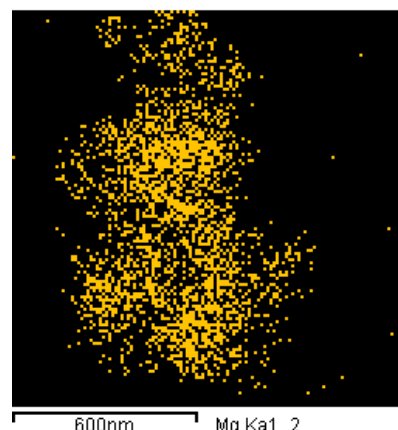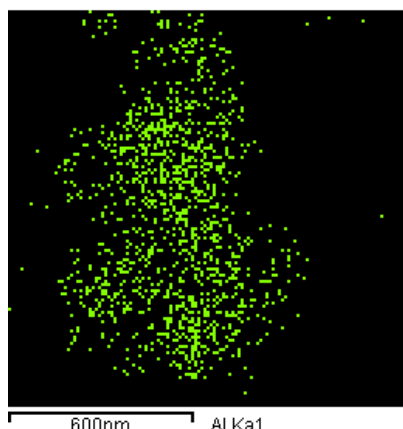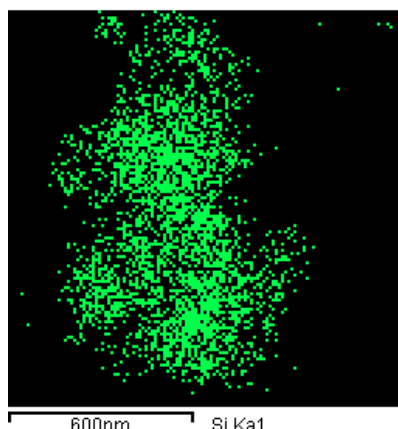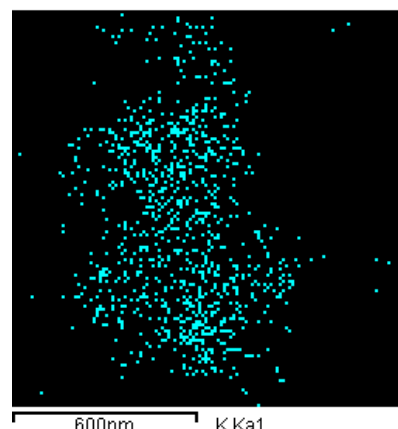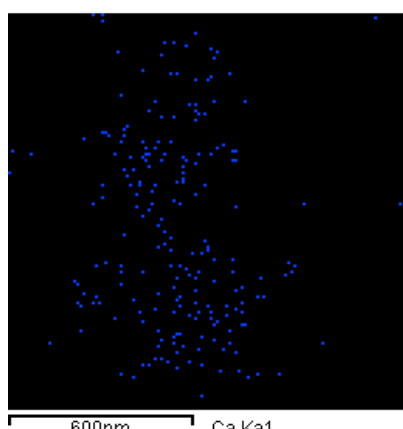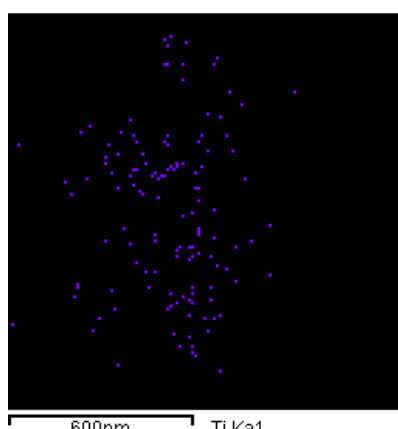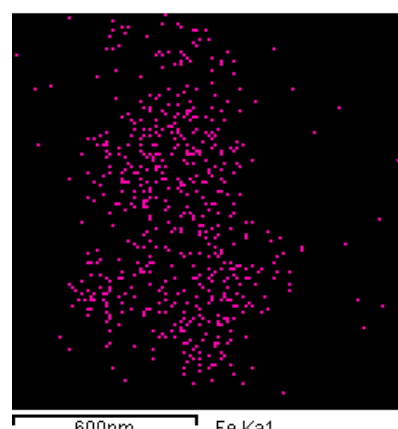

Comment:

Project: Project 1

Owner: INCA

Sample: CHG-4P-MW-Ex

Type: Default

| Element | Peak | Area  | k      | Abs    | Weight% | Weight% | Atomic% |
|---------|------|-------|--------|--------|---------|---------|---------|
|         | Area | Sigma | factor | Corrn. |         | Sigma   |         |
| O K     | 6155 | 147   | 1.065  | 1.000  | 48.18   | 0.73    | 62.71   |
| Mg K    | 3393 | 104   | 0.606  | 1.000  | 15.11   | 0.44    | 12.94   |
| Al K    | 1584 | 78    | 0.589  | 1.000  | 6.86    | 0.33    | 5.30    |
| Si K    | 4401 | 119   | 0.569  | 1.000  | 18.41   | 0.48    | 13.65   |
| K K     | 1458 | 67    | 0.552  | 1.000  | 5.91    | 0.27    | 3.15    |
| Ca K    | 264  | 36    | 0.542  | 1.000  | 1.05    | 0.14    | 0.55    |
| Ti K    | 133  | 28    | 0.608  | 1.000  | 0.60    | 0.13    | 0.26    |
| Fe K    | 778  | 50    | 0.678  | 1.000  | 3.88    | 0.25    | 1.45    |
| Totals  |      |       |        |        | 100.00  |         |         |

Project: Project 1

Owner: INCA

Sample: CHG-4P-MW-Ex

Type: Default

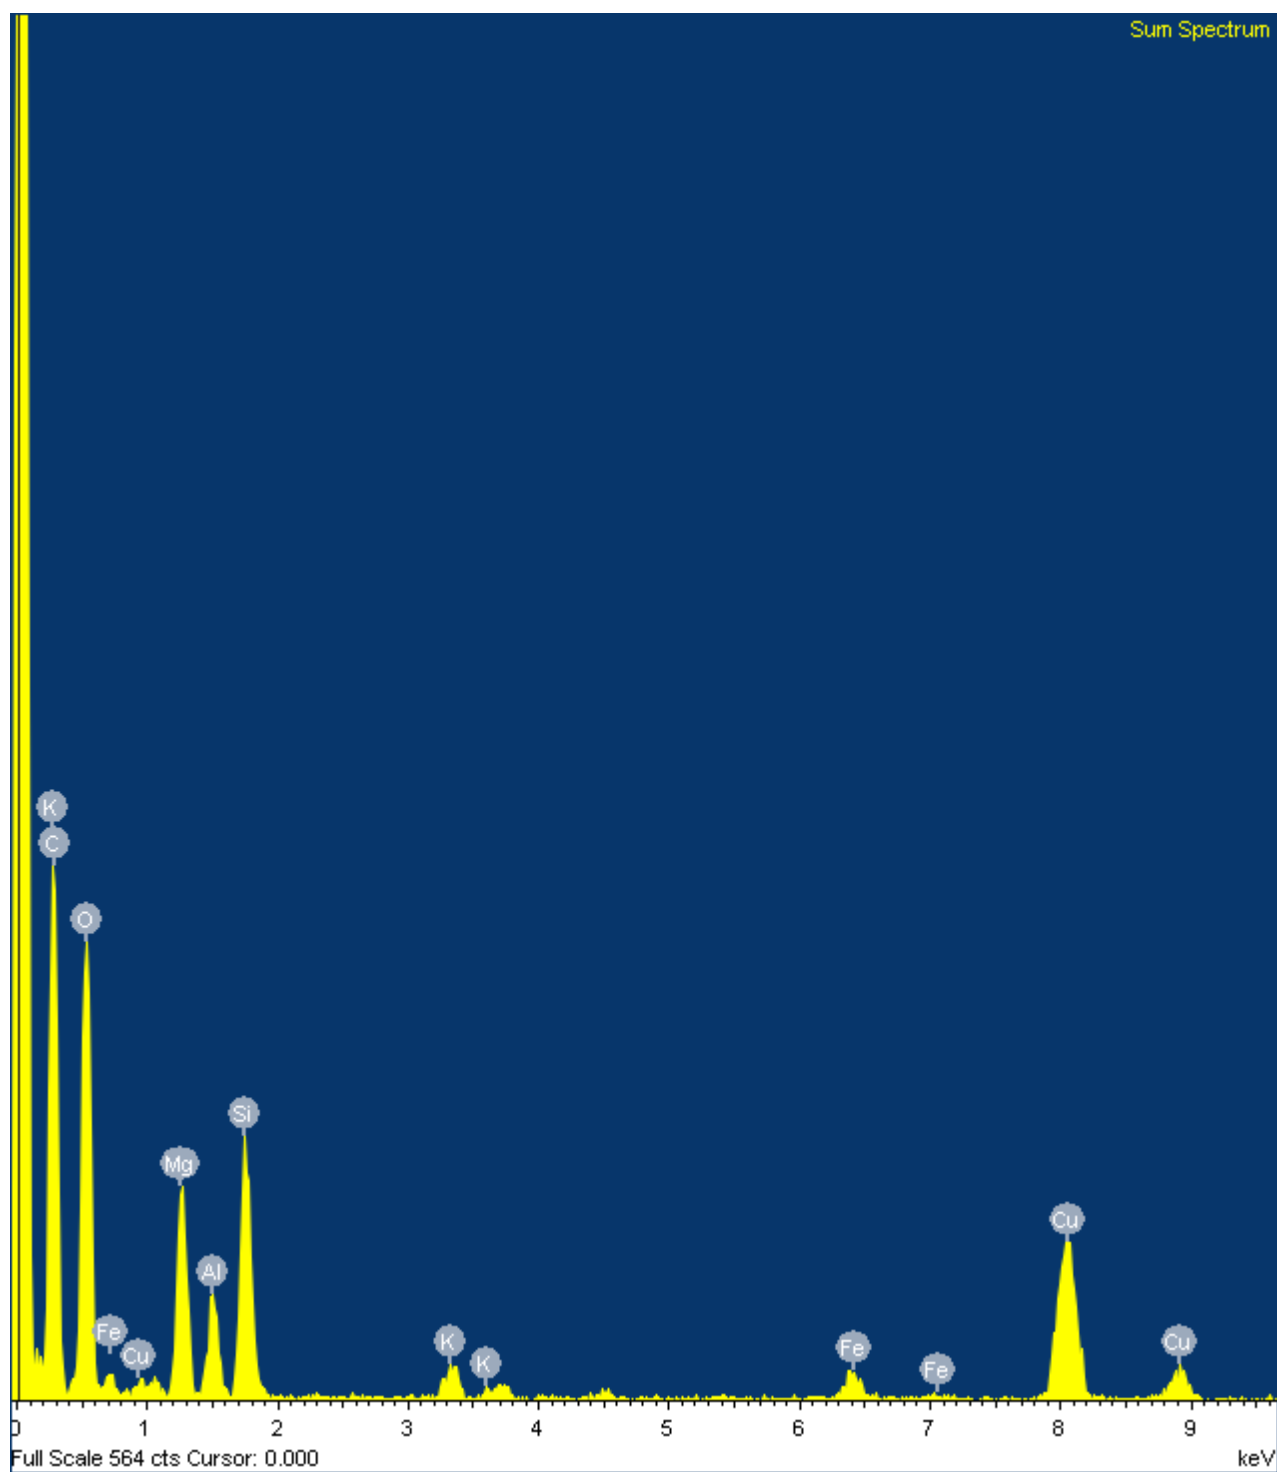

Comment:

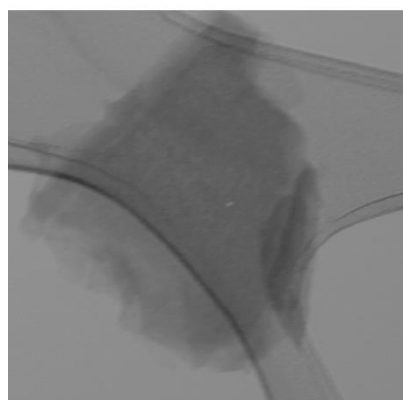

100nm

Electron Image 1

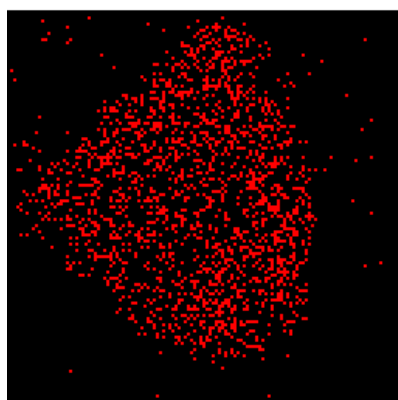

100nm

O Ka1

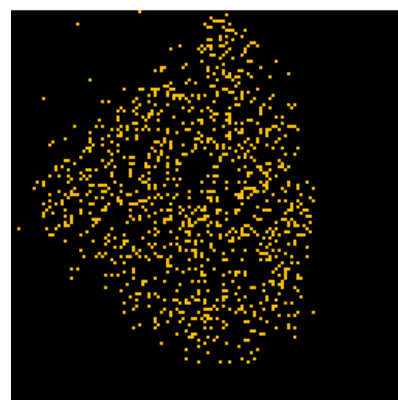

100nm

Mg Ka1\_2

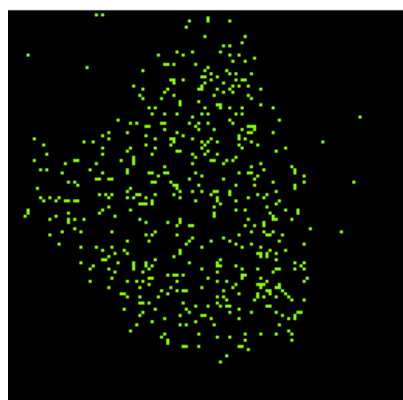

100nm

Al Ka1

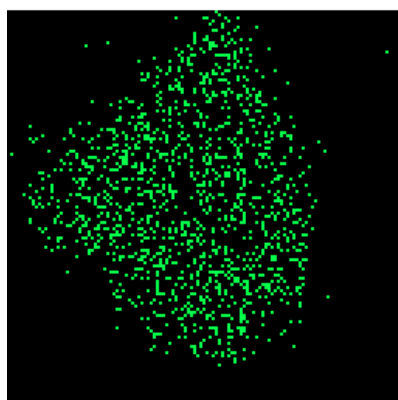

100nm

Si Ka1

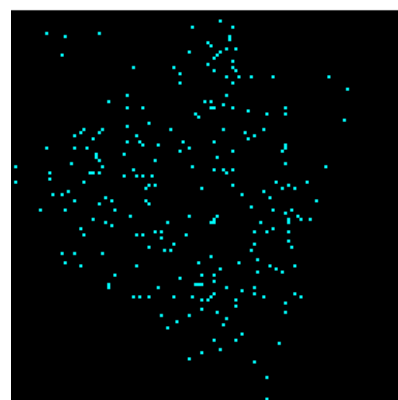

100nm

K Ka1

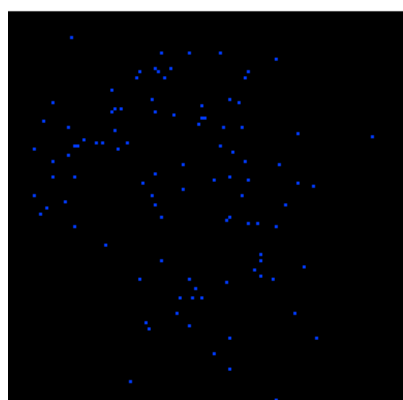

100nm

Ca Ka1

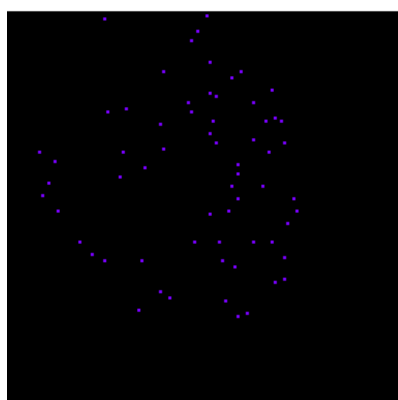

100nm

Ti Ka1

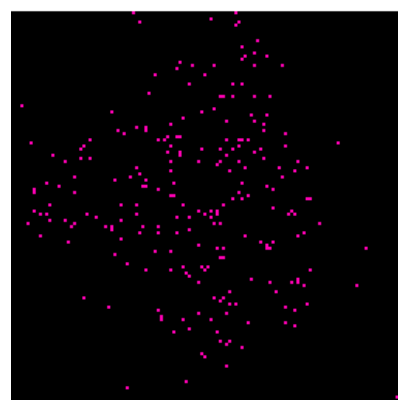

100nm

Fe Ka1

Comment:



Project: Project 1

Owner: INCA

Sample: CHG-4P-MW-Ex

Type: Default

| Element | Peak | Area  | k      | Abs    | Weight% | Weight% | Atomic% |
|---------|------|-------|--------|--------|---------|---------|---------|
|         | Area | Sigma | factor | Corrn. |         | Sigma   |         |
| O K     | 2984 | 101   | 1.065  | 1.000  | 53.80   | 1.09    | 67.50   |
| Mg K    | 1345 | 66    | 0.606  | 1.000  | 13.79   | 0.65    | 11.39   |
| Al K    | 671  | 51    | 0.589  | 1.000  | 6.70    | 0.50    | 4.98    |
| Si K    | 1817 | 77    | 0.569  | 1.000  | 17.51   | 0.72    | 12.52   |
| K K     | 334  | 36    | 0.552  | 1.000  | 3.12    | 0.33    | 1.60    |
| Ca K    | 110  | 26    | 0.542  | 1.000  | 1.01    | 0.24    | 0.50    |
| Ti K    | 68   | 20    | 0.608  | 1.000  | 0.70    | 0.21    | 0.29    |
| Fe K    | 293  | 34    | 0.678  | 1.000  | 3.36    | 0.38    | 1.21    |
| Totals  |      |       |        |        | 100.00  |         |         |

Project: Project 1

Owner: INCA

Sample: CHG-4P-MW-Ex

Type: Default

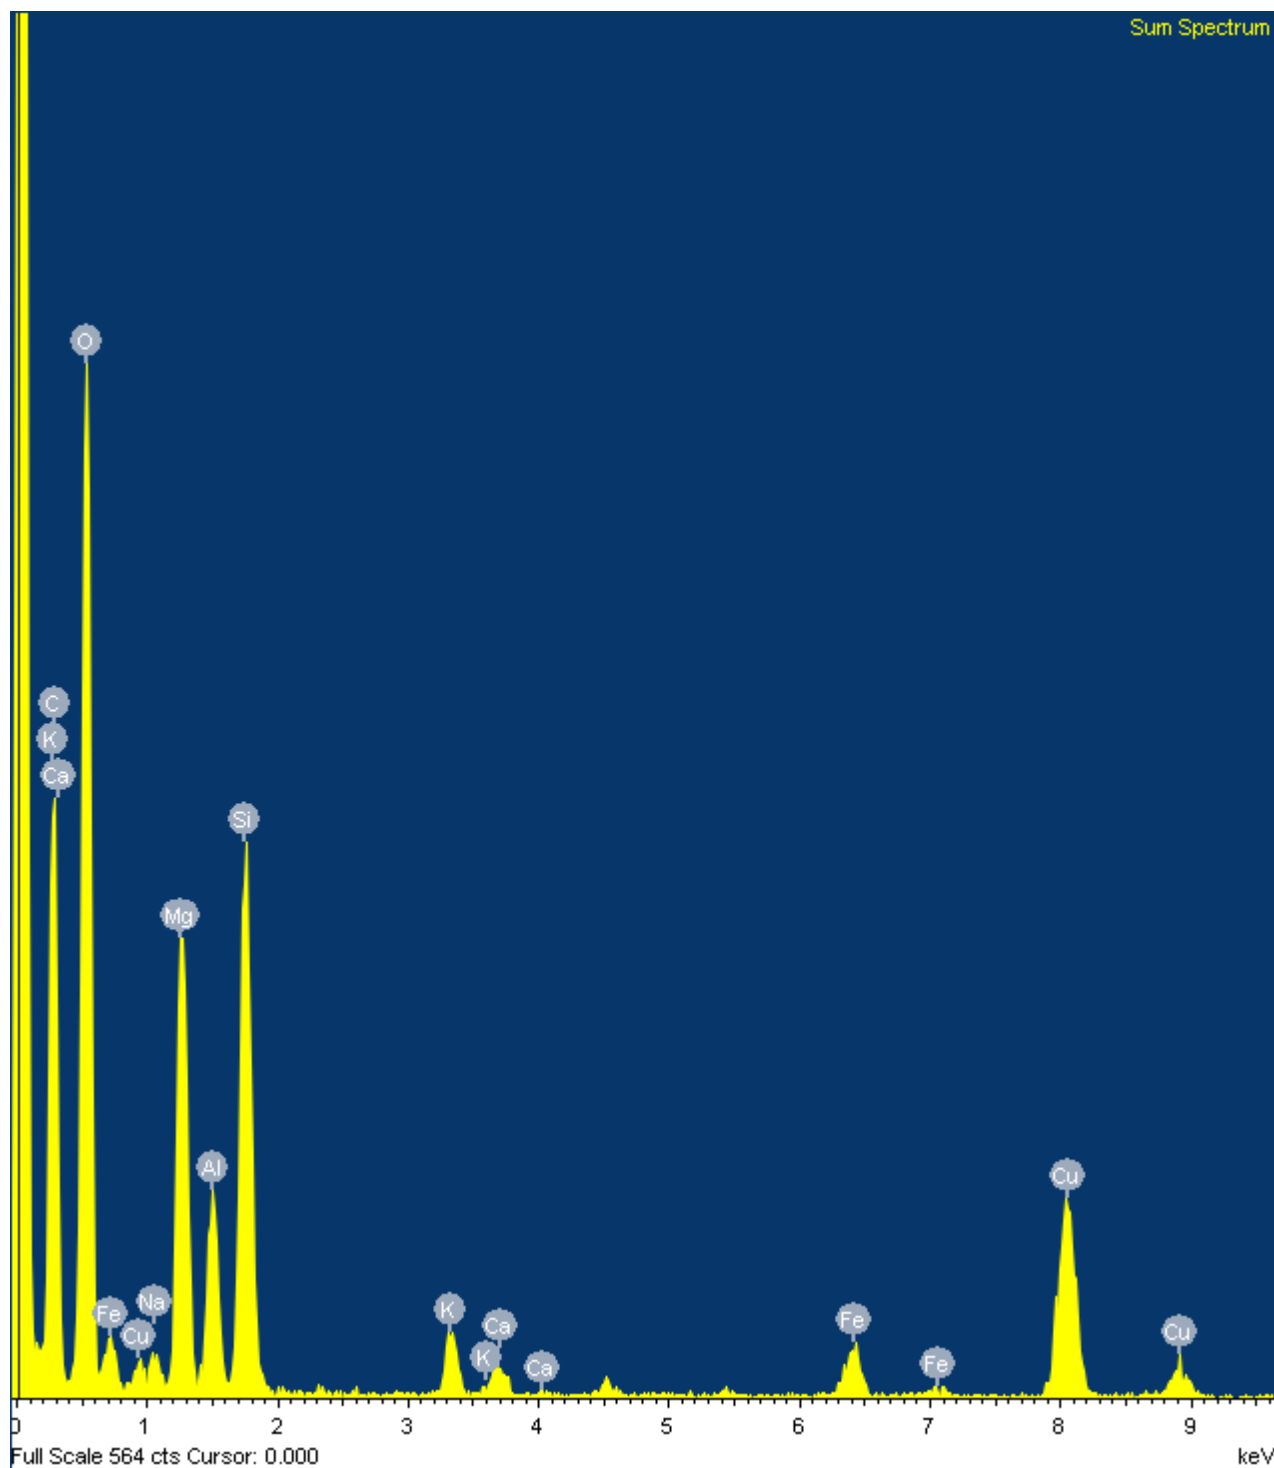

Comment:

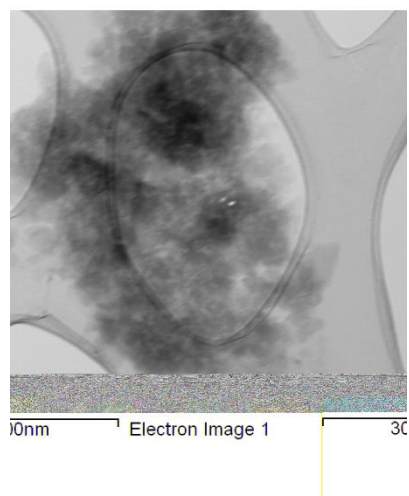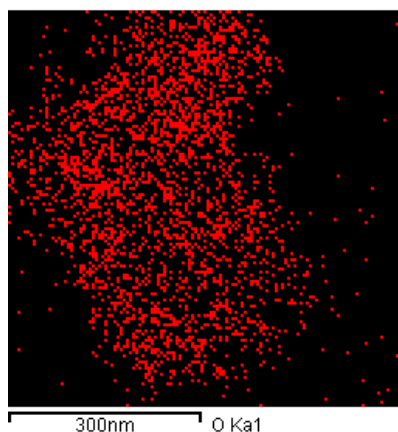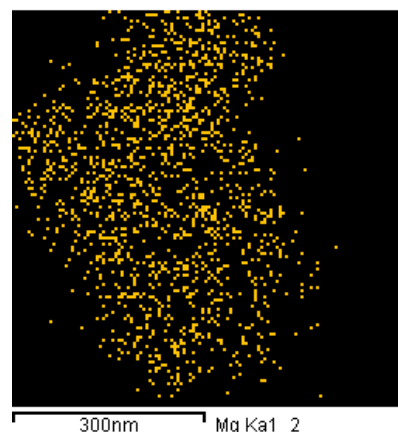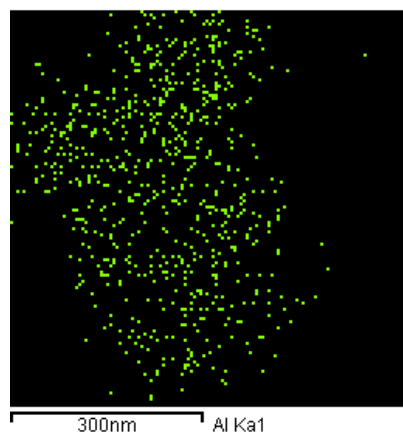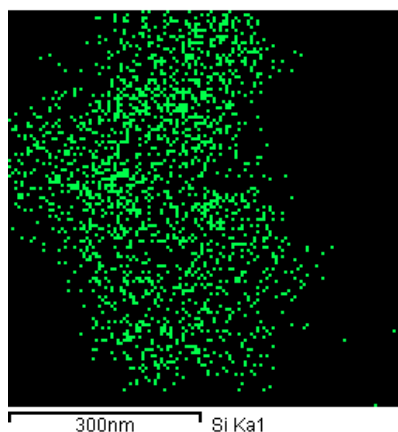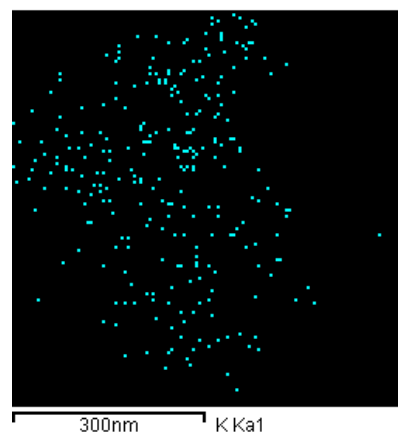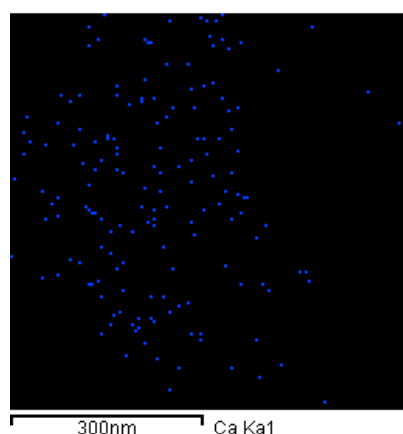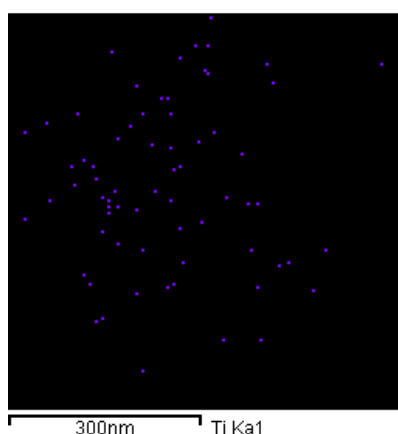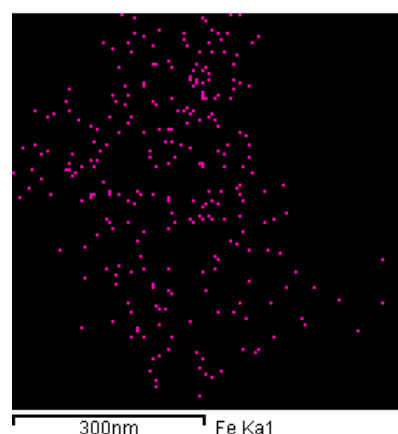

Comment:

Project: Project 1

Owner: INCA

Sample: CHG-4P-MW-Ex

Type: Default

| Element | Peak | Area  | k      | Abs    | Weight% | Weight% | Atomic% |
|---------|------|-------|--------|--------|---------|---------|---------|
|         | Area | Sigma | factor | Corrn. |         | Sigma   |         |
| O K     | 6430 | 148   | 1.065  | 1.000  | 53.56   | 0.74    | 67.03   |
| Mg K    | 3142 | 101   | 0.606  | 1.000  | 14.88   | 0.46    | 12.26   |
| Al K    | 1348 | 74    | 0.589  | 1.000  | 6.21    | 0.33    | 4.61    |
| Si K    | 4052 | 115   | 0.569  | 1.000  | 18.04   | 0.49    | 12.86   |
| K K     | 627  | 47    | 0.552  | 1.000  | 2.71    | 0.20    | 1.39    |
| Ca K    | 285  | 36    | 0.542  | 1.000  | 1.21    | 0.15    | 0.60    |
| Ti K    | 113  | 27    | 0.608  | 1.000  | 0.54    | 0.13    | 0.22    |
| Fe K    | 540  | 45    | 0.678  | 1.000  | 2.86    | 0.23    | 1.03    |
| Totals  |      |       |        |        | 100.00  |         |         |

Project: Project 1

Owner: INCA

Sample: CHG-4P-MW-Ex

Type: Default

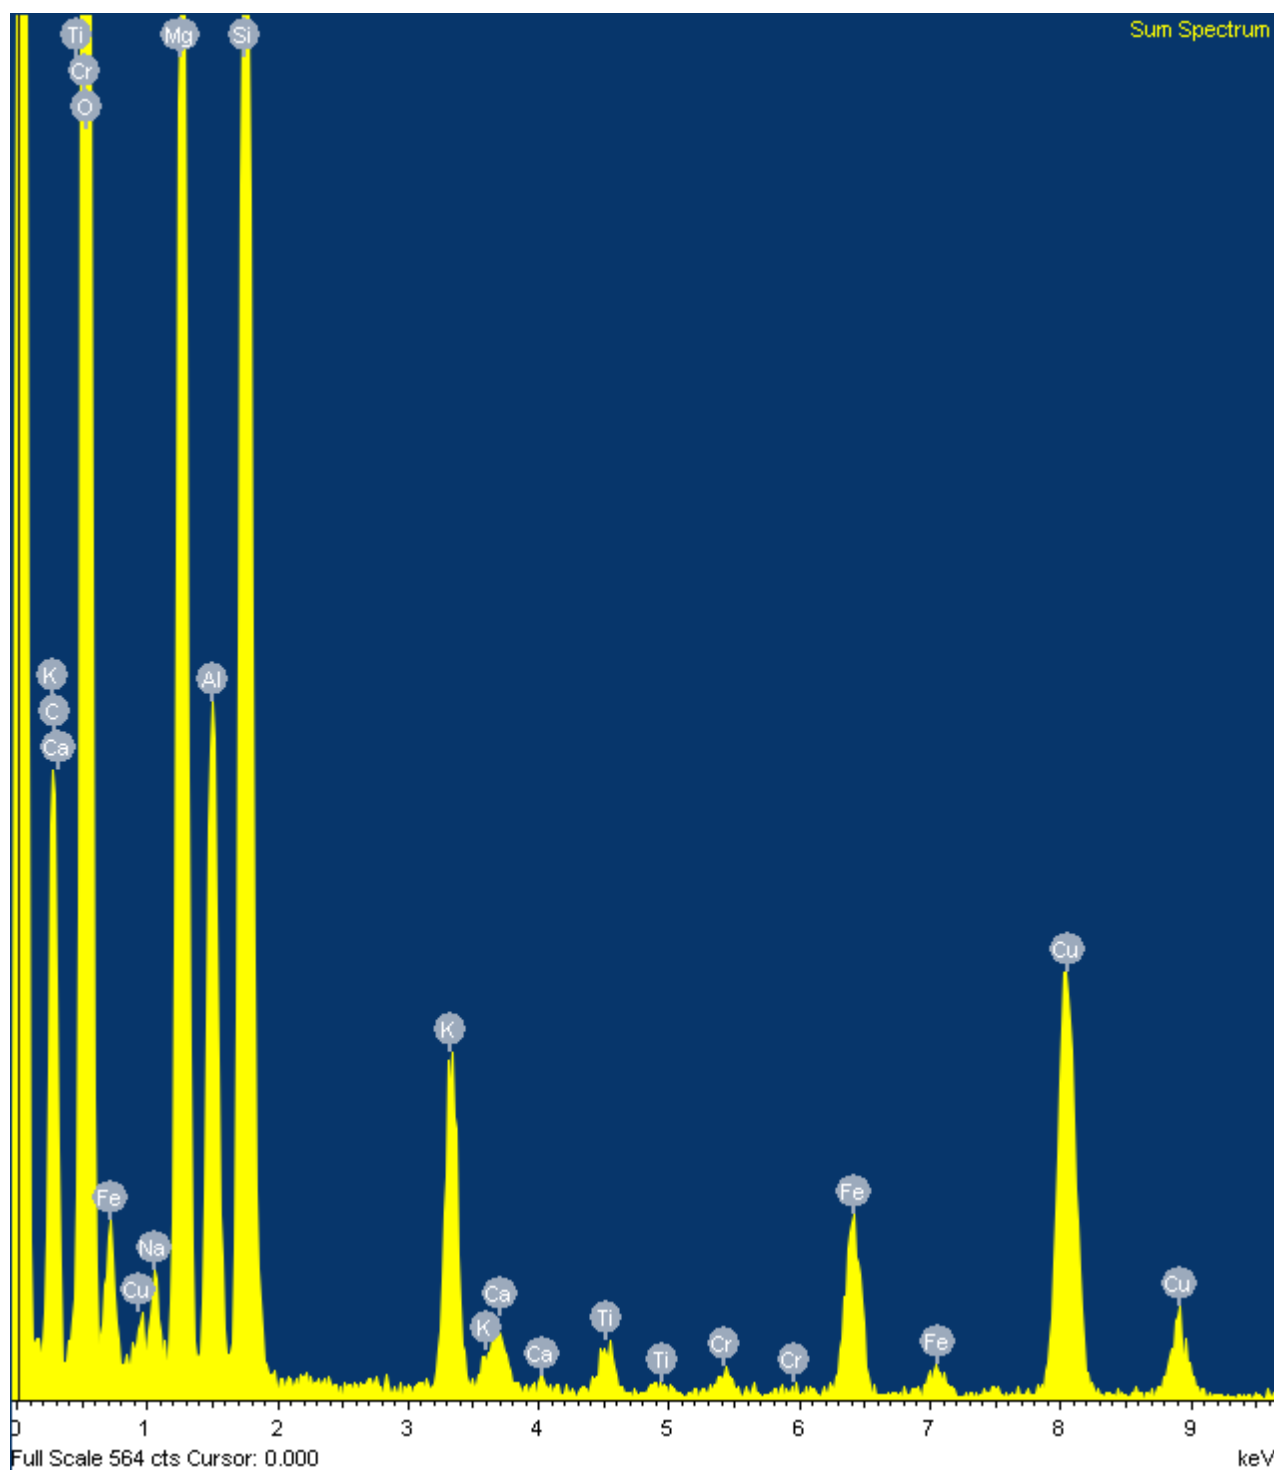

Comment:

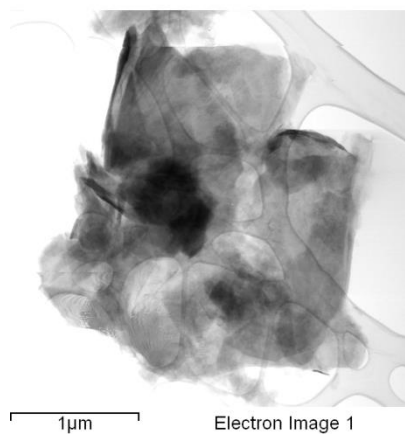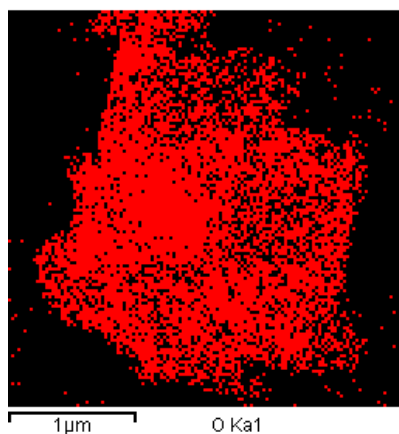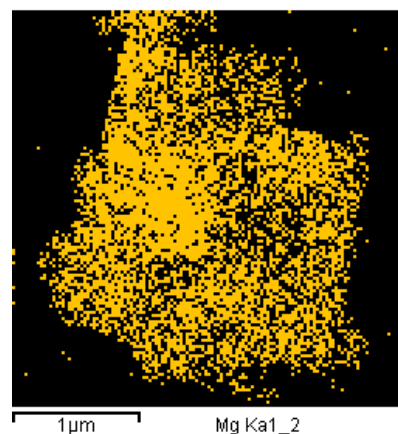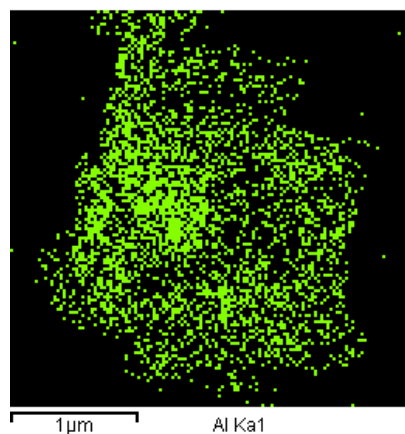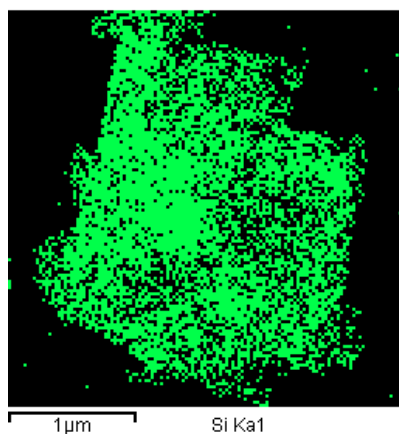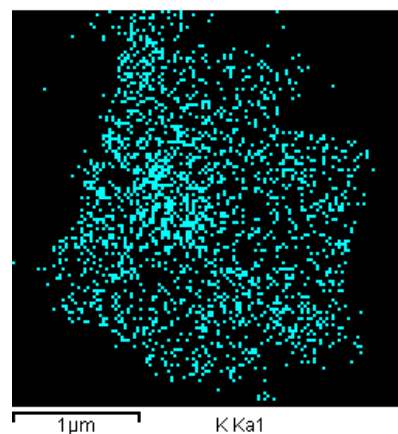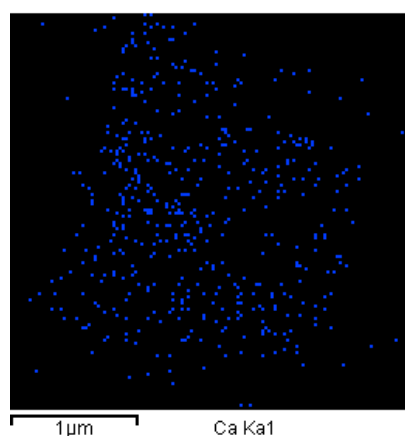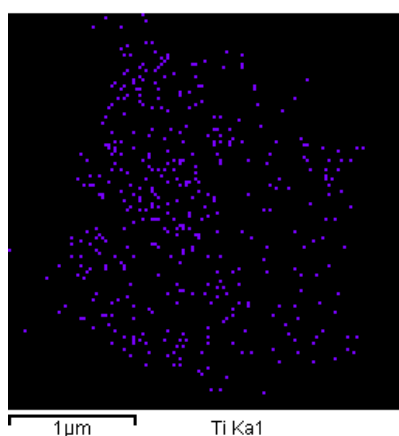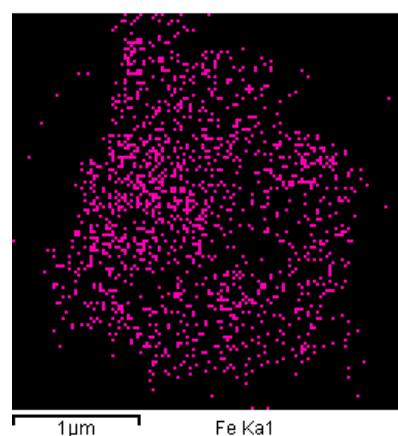

Comment:

Project: Project 1

Owner: INCA

Sample: CHG-4P-MW-Ex

Type: Default

| Element | Peak  | Area  | k      | Abs   | Weight% | Weight% | Atomic% |
|---------|-------|-------|--------|-------|---------|---------|---------|
|         | Area  | Sigma | factor | Corn. |         | Sigma   |         |
| O K     | 19657 | 257   | 1.065  | 1.000 | 49.13   | 0.40    | 63.18   |
| Mg K    | 11339 | 188   | 0.606  | 1.000 | 16.12   | 0.26    | 13.64   |
| Al K    | 4574  | 137   | 0.589  | 1.000 | 6.33    | 0.18    | 4.83    |
| Si K    | 14542 | 214   | 0.569  | 1.000 | 19.42   | 0.27    | 14.23   |
| K K     | 3273  | 104   | 0.552  | 1.000 | 4.24    | 0.13    | 2.23    |
| Ca K    | 523   | 57    | 0.542  | 1.000 | 0.67    | 0.07    | 0.34    |
| Ti K    | 462   | 49    | 0.608  | 1.000 | 0.66    | 0.07    | 0.28    |
| Fe K    | 2161  | 82    | 0.678  | 1.000 | 3.44    | 0.13    | 1.27    |
| Totals  |       |       |        |       | 100.00  |         |         |

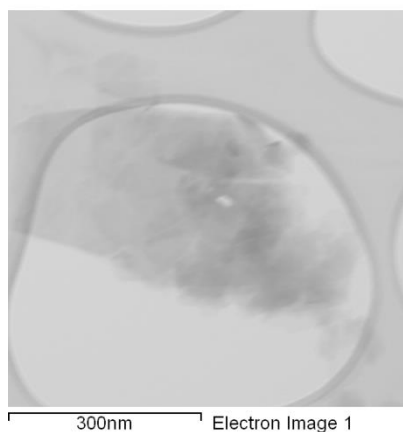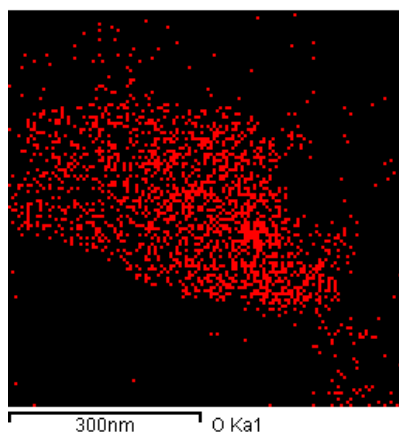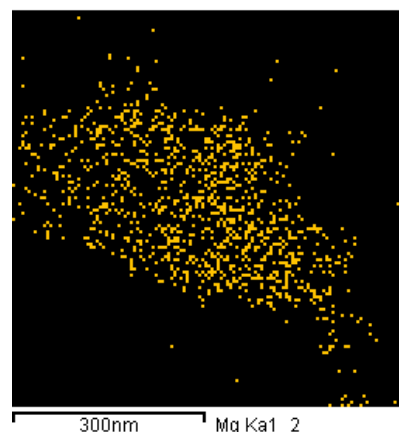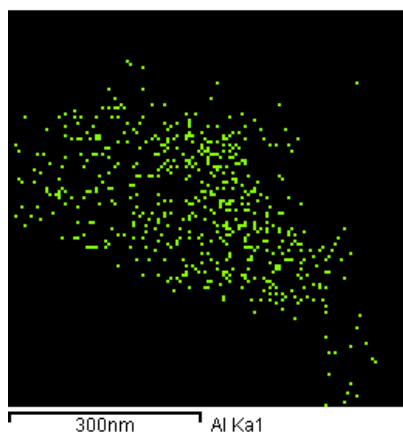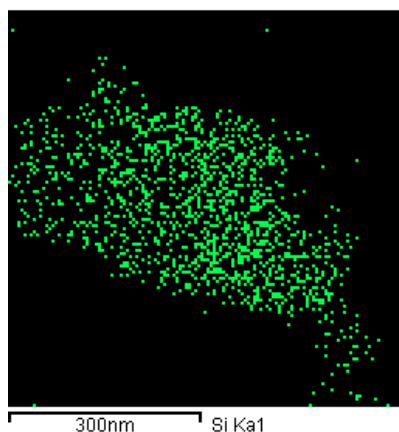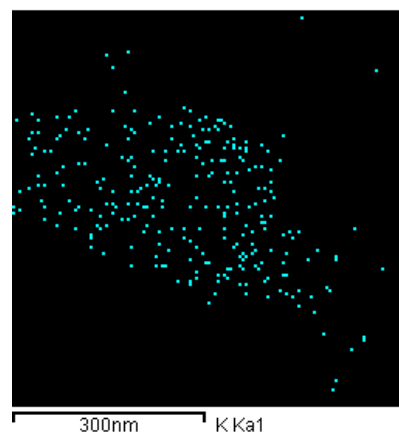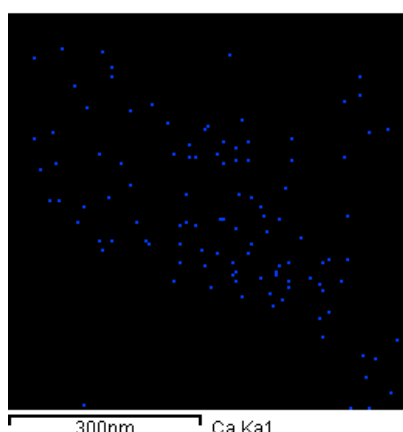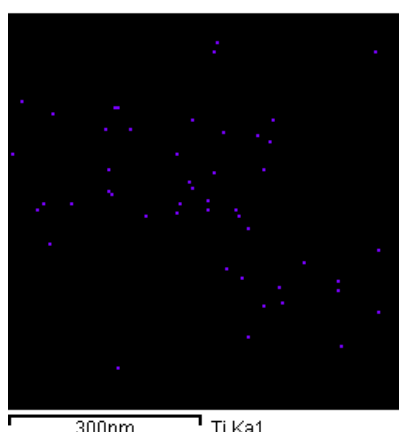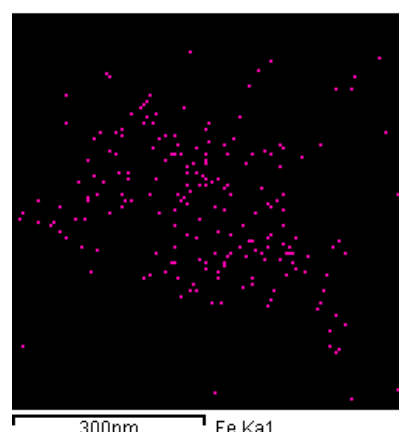

Comment:



Project: Project 1

Owner: INCA

Sample: CHG-4P-MW-Ex

Type: Default

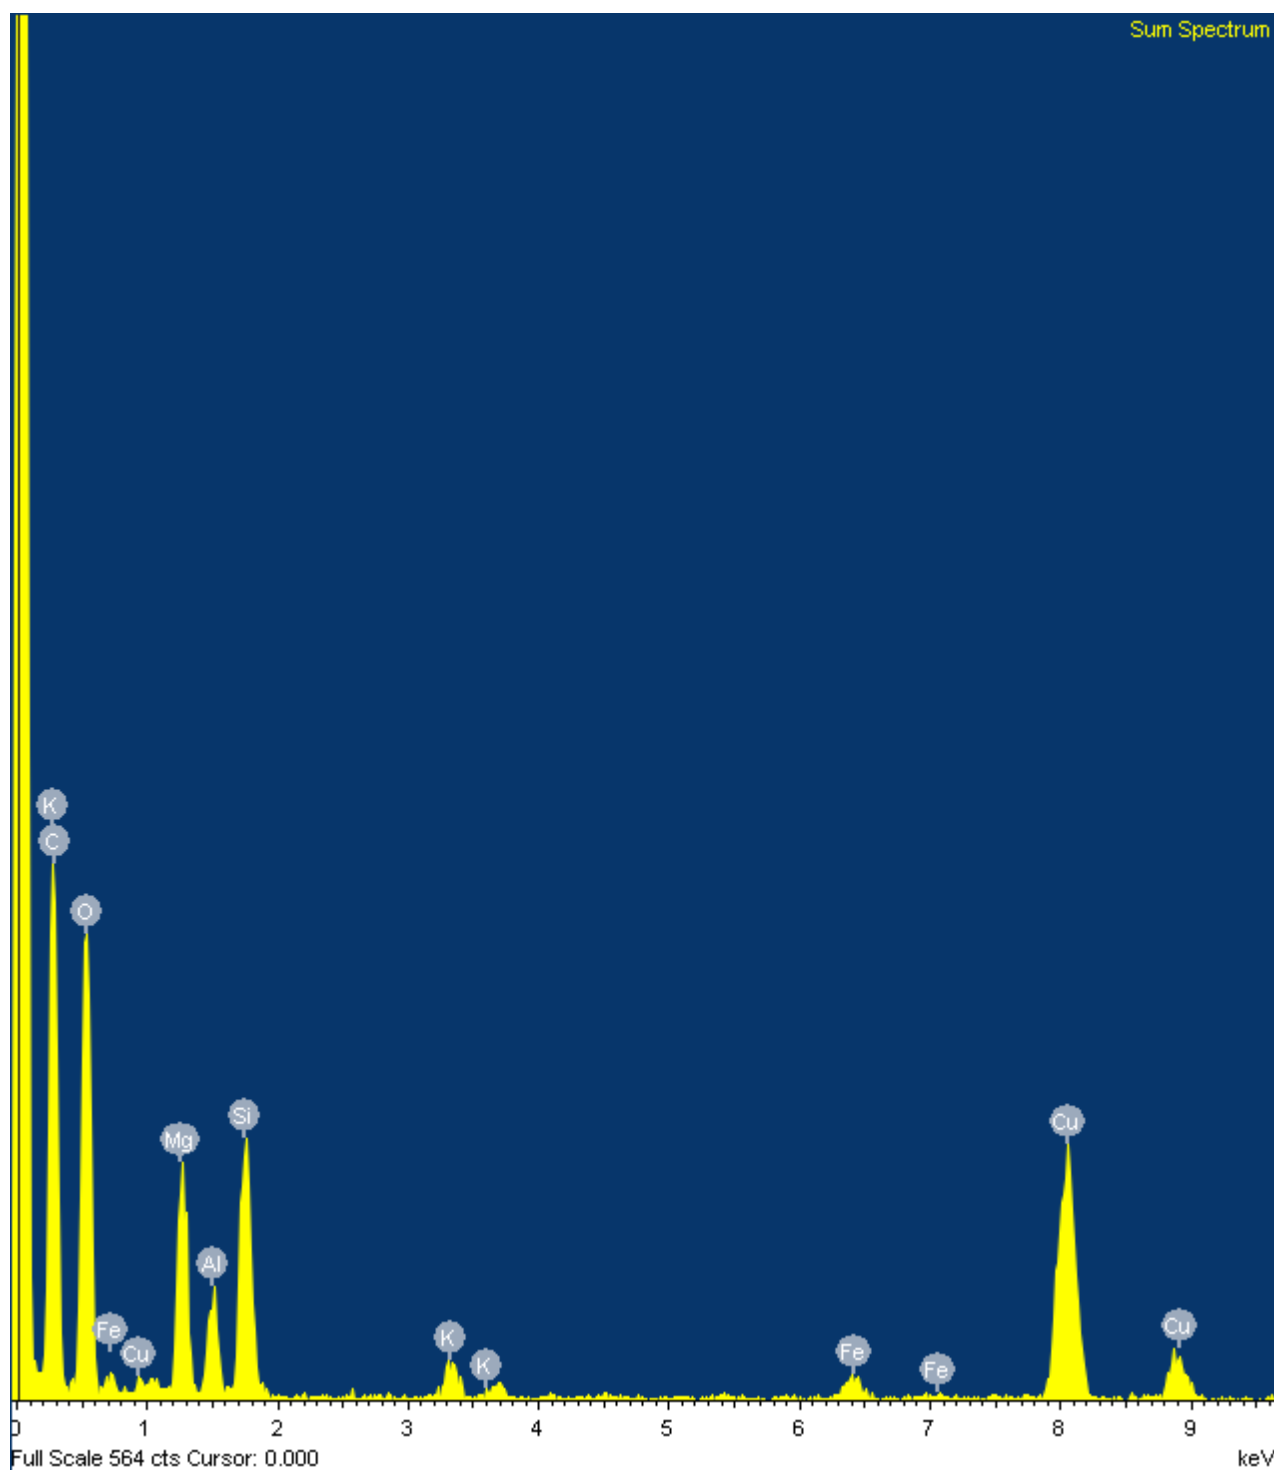

Comment:

Project: Project 1

Owner: INCA

Sample: CHG-4P-MW-Ex

Type: Default

| Element | Peak | Area  | k      | Abs    | Weight% | Weight% | Atomic% |
|---------|------|-------|--------|--------|---------|---------|---------|
|         | Area | Sigma | factor | Corrn. |         | Sigma   |         |
| O K     | 3020 | 103   | 1.065  | 1.000  | 53.90   | 1.09    | 67.29   |
| Mg K    | 1476 | 69    | 0.606  | 1.000  | 14.98   | 0.67    | 12.30   |
| Al K    | 650  | 52    | 0.589  | 1.000  | 6.42    | 0.50    | 4.75    |
| Si K    | 1826 | 79    | 0.569  | 1.000  | 17.41   | 0.72    | 12.38   |
| K K     | 355  | 37    | 0.552  | 1.000  | 3.28    | 0.34    | 1.68    |
| Ca K    | 109  | 25    | 0.542  | 1.000  | 0.99    | 0.23    | 0.49    |
| Ti K    | 30   | 19    | 0.608  | 1.000  | 0.31    | 0.19    | 0.13    |
| Fe K    | 239  | 32    | 0.678  | 1.000  | 2.71    | 0.36    | 0.97    |
| Totals  |      |       |        |        | 100.00  |         |         |
