# Supplementary material for: Heterogeneous Distribution of Interlayer Cations and Iron as a Plausible Explanation of the Non-Exfoliation of Commercial Vermiculites Post Alcohol Treatment and Microwave Irradiation
Source: MDPI journal article supplement (doi:10.3390/min11080835), 2021-08-01
Supplement: s1 [file s1]

Project: Project 1

Owner: INCA

Sample: CHG-4B-MW-No

Type: Default

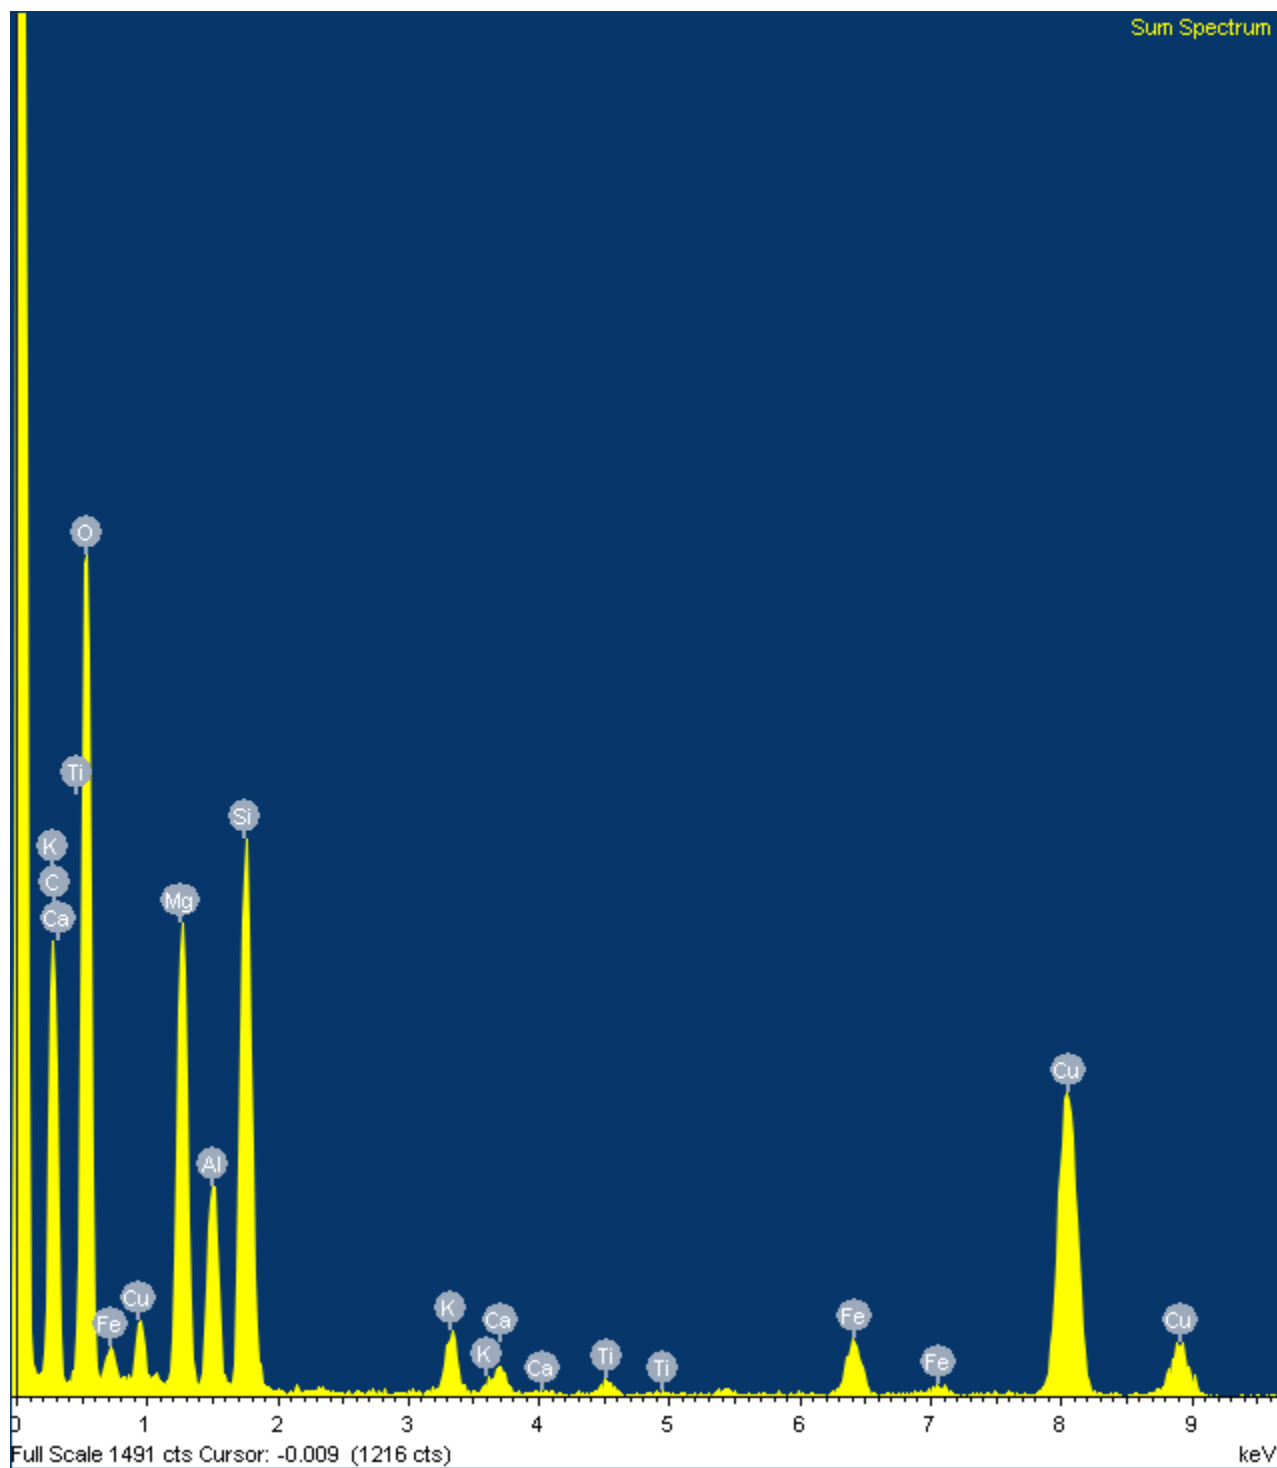

Comment:

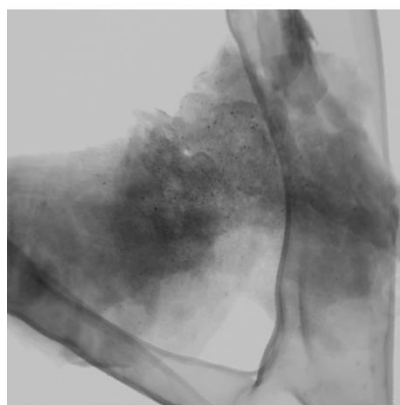

500nm Electron Image 1

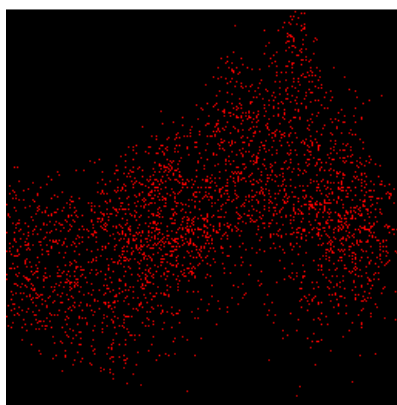

500nm O Ka1

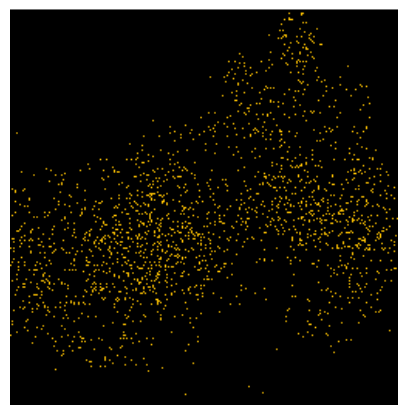

500nm Mg Ka1\_2

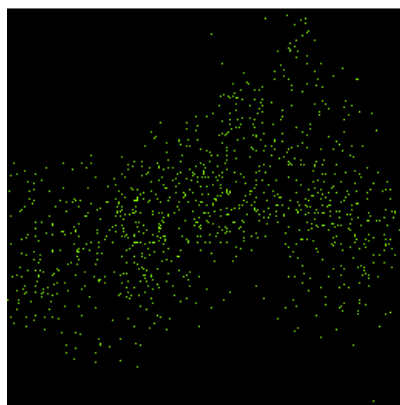

500nm Al Ka1

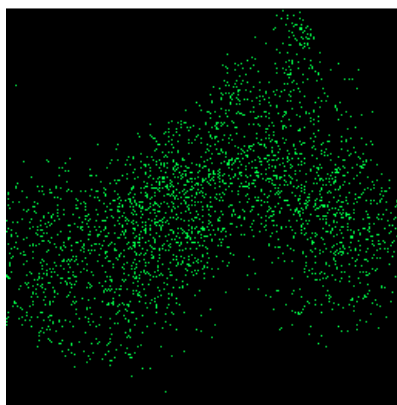

500nm Si Ka1

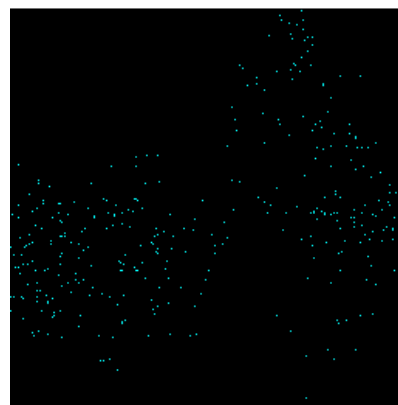

500nm K Ka1

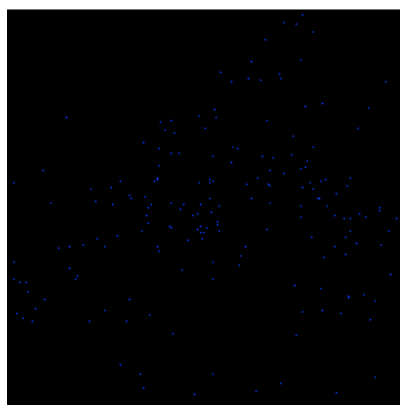

500nm Ca Ka1

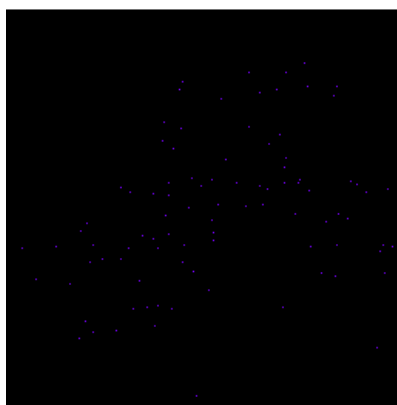

500nm Ti Ka1

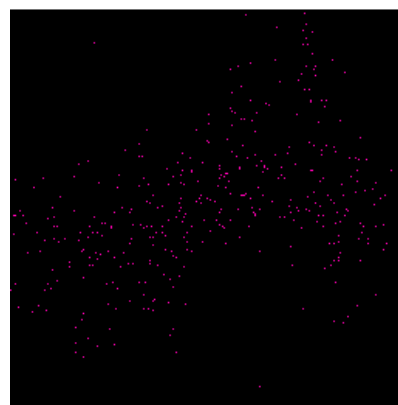

500nm Fe Ka1

Comment:

Project: Project 1

Owner: INCA

Sample: CHG-4B-MW-No

Type: Default

| Element | Peak  | Area  | k      | Abs   | Weight% | Weight% | Atomic% |
|---------|-------|-------|--------|-------|---------|---------|---------|
|         | Area  | Sigma | factor | Corn. |         | Sigma   |         |
| O K     | 14061 | 220   | 1.065  | 1.000 | 48.28   | 0.48    | 62.30   |
| Mg K    | 8295  | 162   | 0.606  | 1.000 | 16.20   | 0.30    | 13.75   |
| Al K    | 3760  | 124   | 0.589  | 1.000 | 7.15    | 0.23    | 5.47    |
| Si K    | 11000 | 187   | 0.569  | 1.000 | 20.18   | 0.33    | 14.84   |
| K K     | 1500  | 74    | 0.552  | 1.000 | 2.67    | 0.13    | 1.41    |
| Ca K    | 598   | 58    | 0.542  | 1.000 | 1.05    | 0.10    | 0.54    |
| Ti K    | 352   | 44    | 0.608  | 1.000 | 0.69    | 0.09    | 0.30    |
| Fe K    | 1736  | 75    | 0.678  | 1.000 | 3.79    | 0.16    | 1.40    |
| Totals  |       |       |        |       | 100.00  |         |         |

Project: Project 1

Owner: INCA

Sample: CHG-4B-MW-No

Type: Default

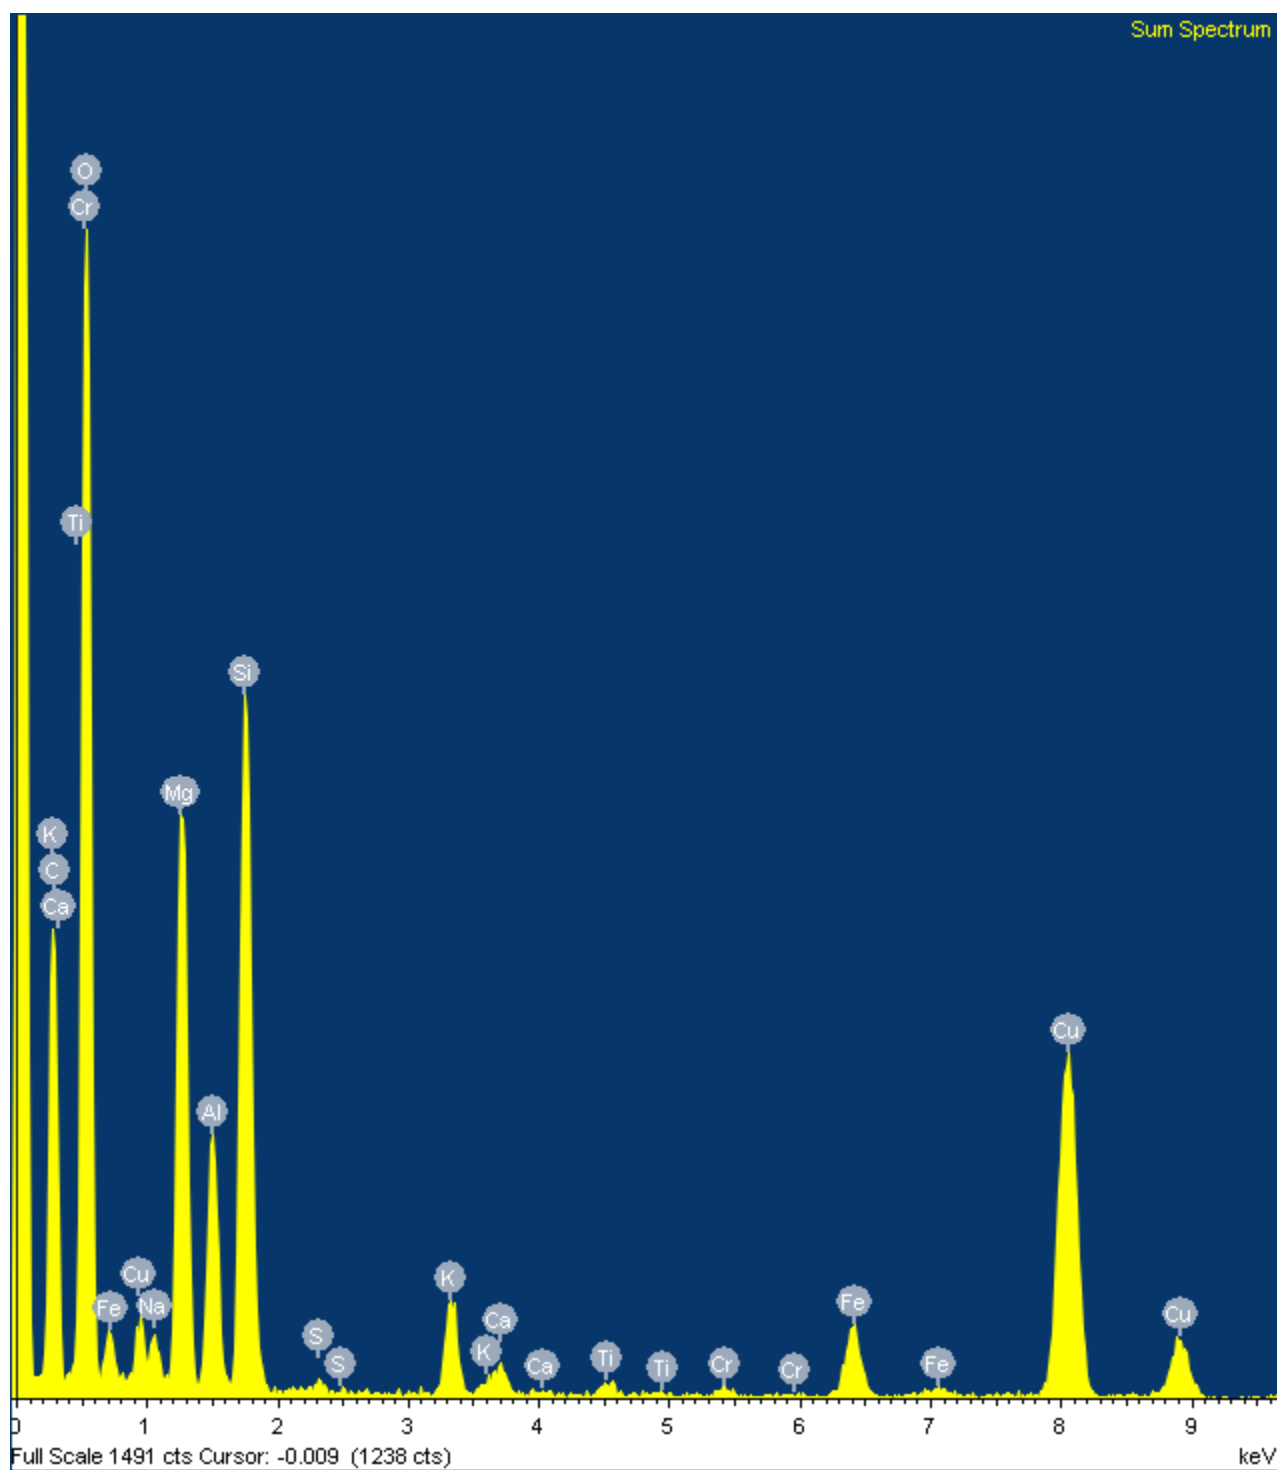

Comment:

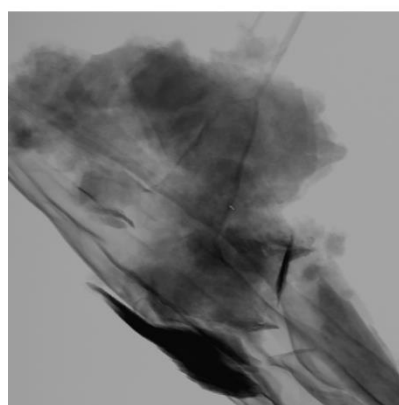

900nm Electron Image 1

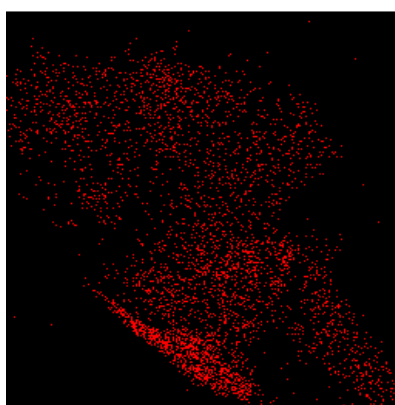

900nm O Ka1

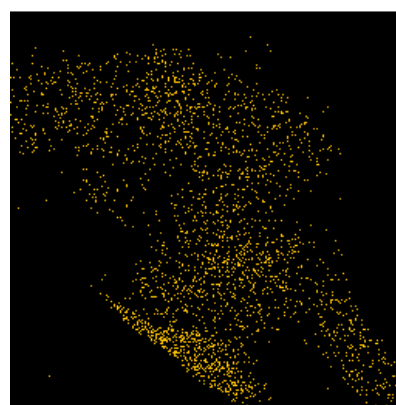

900nm Mg Ka1\_2

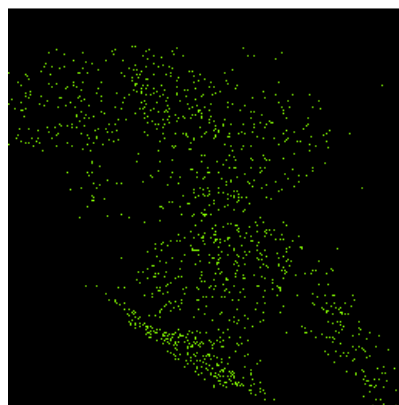

900nm Al Ka1

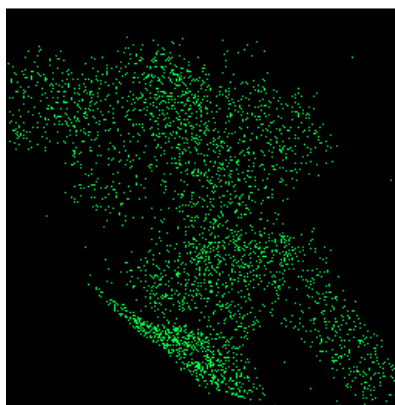

900nm Si Ka1

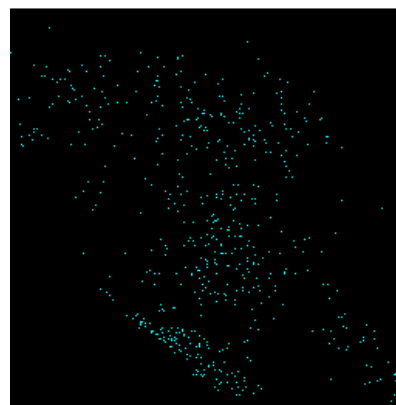

900nm K Ka1

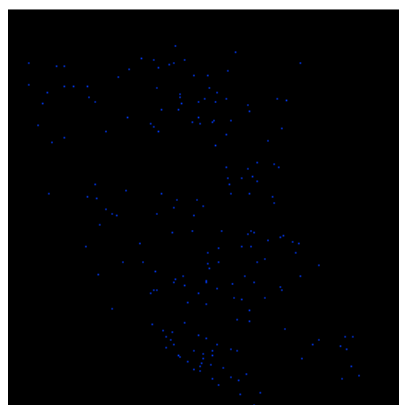

900nm Ca Ka1

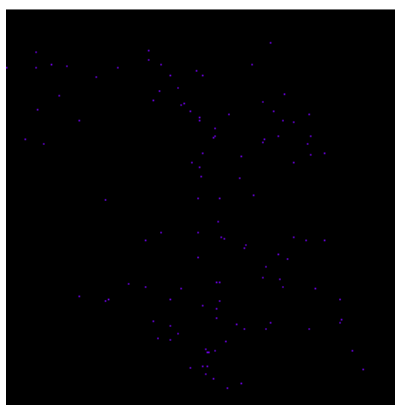

900nm Ti Ka1

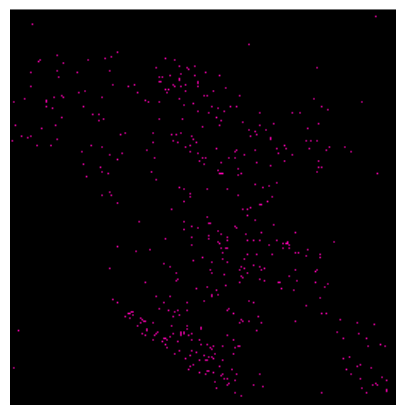

900nm Fe Ka1

Comment:

Project: Project 1

Owner: INCA

Sample: CHG-4B-MW-No

Type: Default

| Element | Peak  | Area  | k      | Abs   | Weight% | Weight% | Atomic% |
|---------|-------|-------|--------|-------|---------|---------|---------|
|         | Area  | Sigma | factor | Corn. |         | Sigma   |         |
| O K     | 19408 | 256   | 1.065  | 1.000 | 50.31   | 0.41    | 64.17   |
| Mg K    | 10777 | 185   | 0.606  | 1.000 | 15.89   | 0.26    | 13.34   |
| Al K    | 4518  | 136   | 0.589  | 1.000 | 6.48    | 0.19    | 4.90    |
| Si K    | 13829 | 210   | 0.569  | 1.000 | 19.16   | 0.28    | 13.92   |
| K K     | 2502  | 93    | 0.552  | 1.000 | 3.36    | 0.12    | 1.75    |
| Ca K    | 675   | 62    | 0.542  | 1.000 | 0.89    | 0.08    | 0.45    |
| Ti K    | 377   | 47    | 0.608  | 1.000 | 0.56    | 0.07    | 0.24    |
| Fe K    | 2035  | 82    | 0.678  | 1.000 | 3.36    | 0.13    | 1.23    |
| Totals  |       |       |        |       | 100.00  |         |         |

Project: Project 1

Owner: INCA

Sample: CHG-4B-MW-No

Type: Default

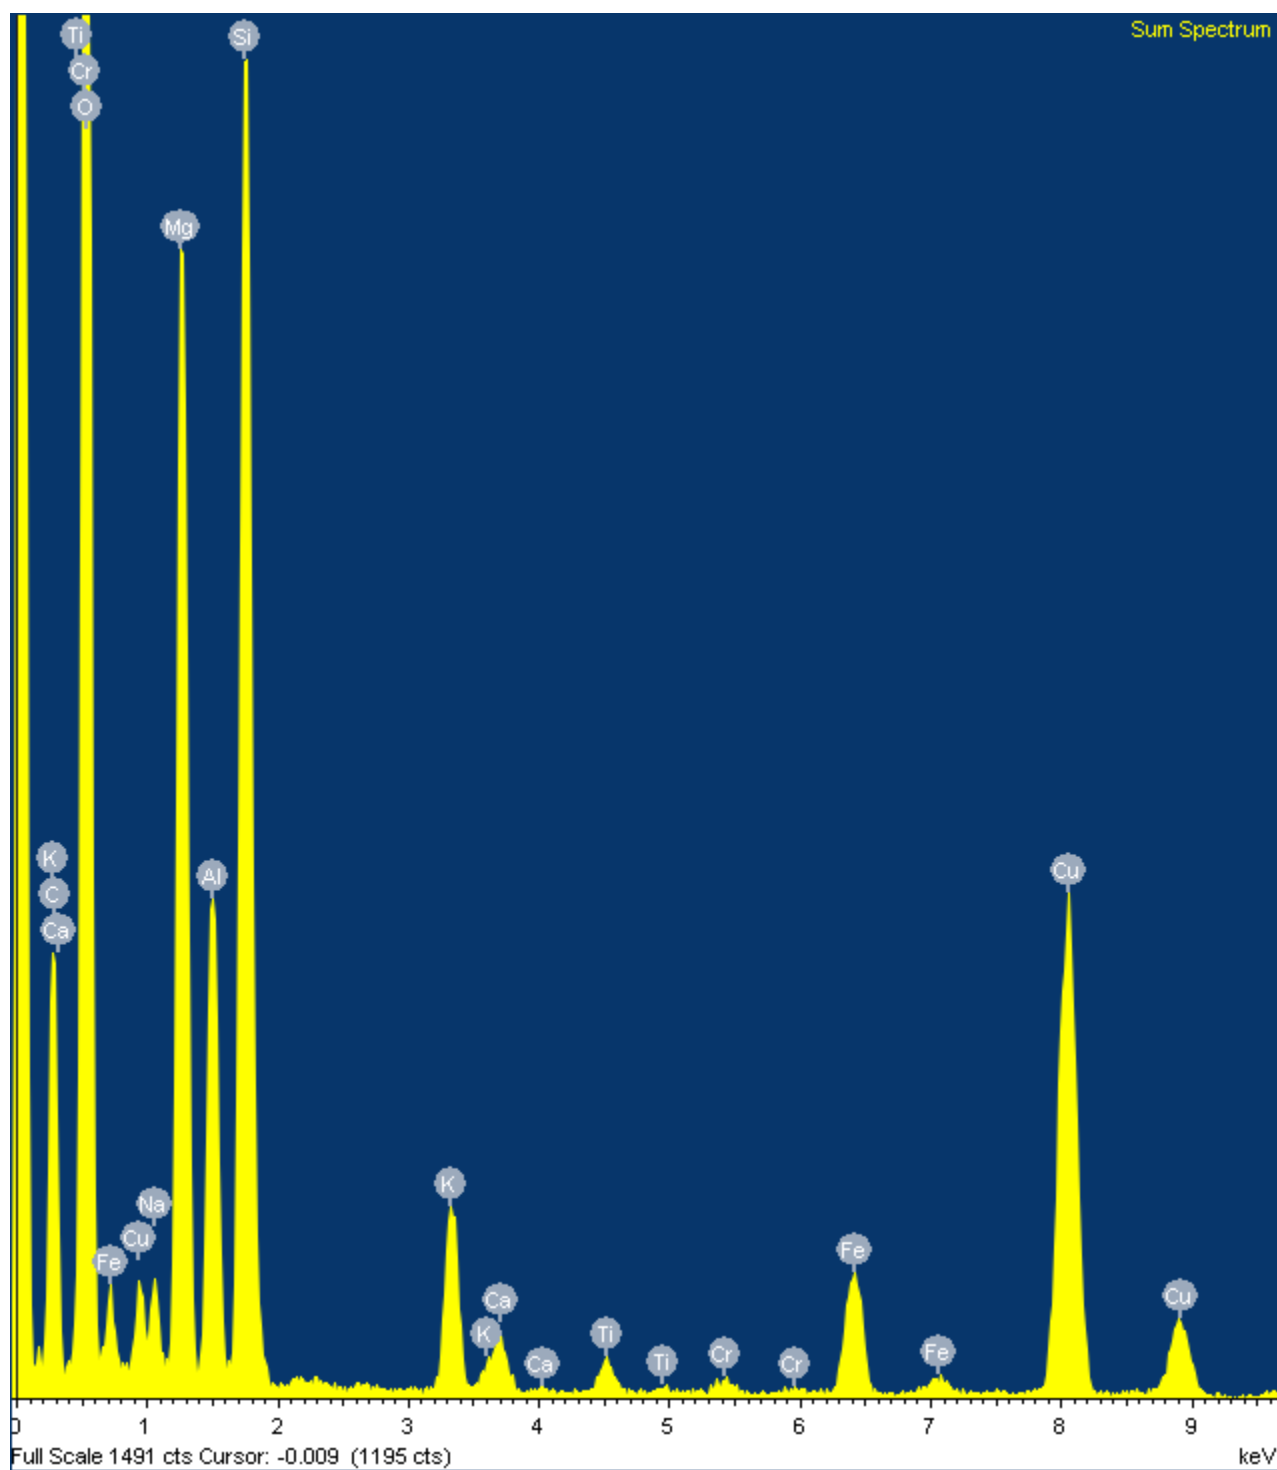

Comment:

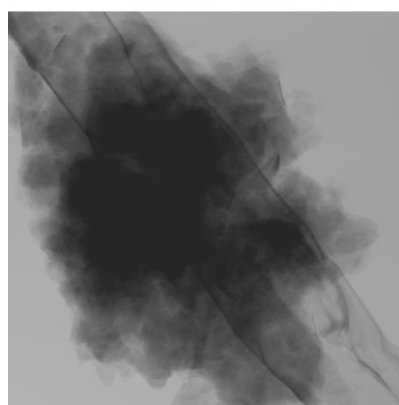

900nm Electron Image 1

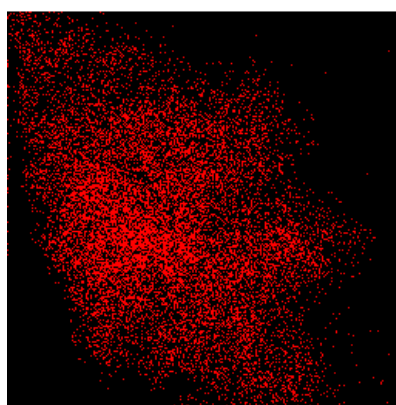

900nm O Ka1

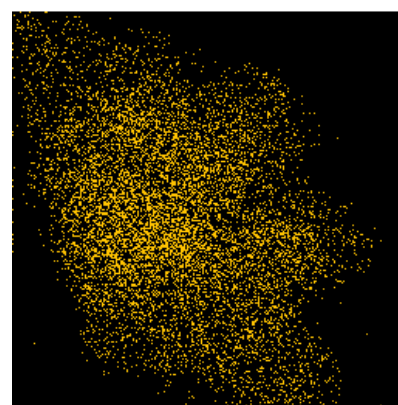

900nm Mg Ka1\_2

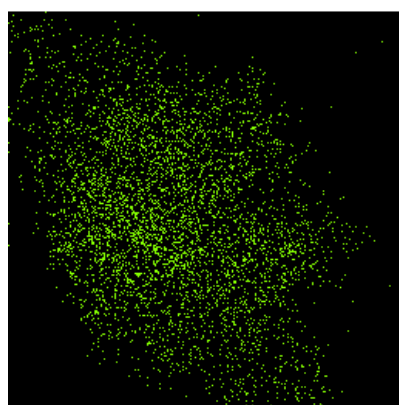

900nm Al Ka1

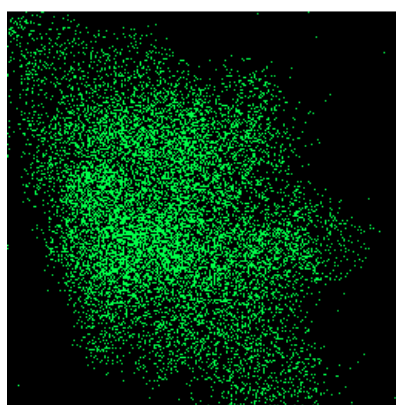

900nm Si Ka1

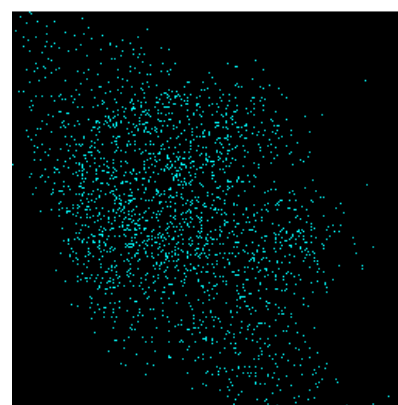

900nm K Ka1

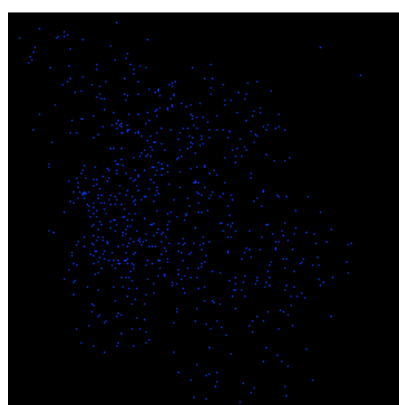

900nm Ca Ka1

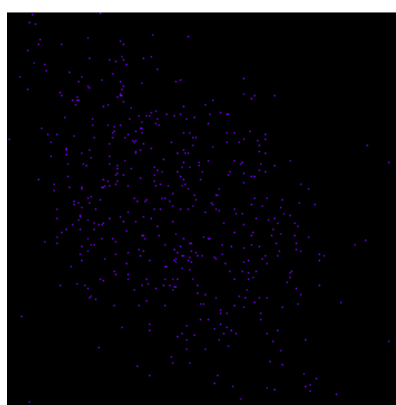

900nm Ti Ka1

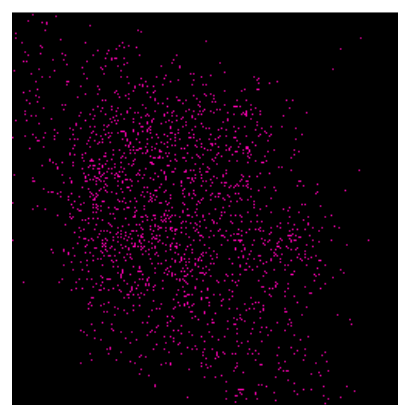

900nm Fe Ka1

Comment:



Project: Project 1

Owner: INCA

Sample: CHG-4B-MW-No

Type: Default

| Element | Peak  | Area  | k      | Abs   | Weight% | Weight% | Atomic% |
|---------|-------|-------|--------|-------|---------|---------|---------|
|         | Area  | Sigma | factor | Corn. |         | Sigma   |         |
| O K     | 33492 | 336   | 1.065  | 1.000 | 47.26   | 0.31    | 61.39   |
| Mg K    | 20888 | 254   | 0.606  | 1.000 | 16.76   | 0.19    | 14.33   |
| Al K    | 9056  | 189   | 0.589  | 1.000 | 7.07    | 0.14    | 5.45    |
| Si K    | 26363 | 291   | 0.569  | 1.000 | 19.88   | 0.21    | 14.71   |
| K K     | 5080  | 133   | 0.552  | 1.000 | 3.72    | 0.10    | 1.97    |
| Ca K    | 1252  | 86    | 0.542  | 1.000 | 0.90    | 0.06    | 0.47    |
| Ti K    | 798   | 69    | 0.608  | 1.000 | 0.64    | 0.06    | 0.28    |
| Fe K    | 4201  | 117   | 0.678  | 1.000 | 3.77    | 0.10    | 1.40    |
| Totals  |       |       |        |       | 100.00  |         |         |

Project: Project 1

Owner: INCA

Sample: CHG-4B-MW-No

Type: Default

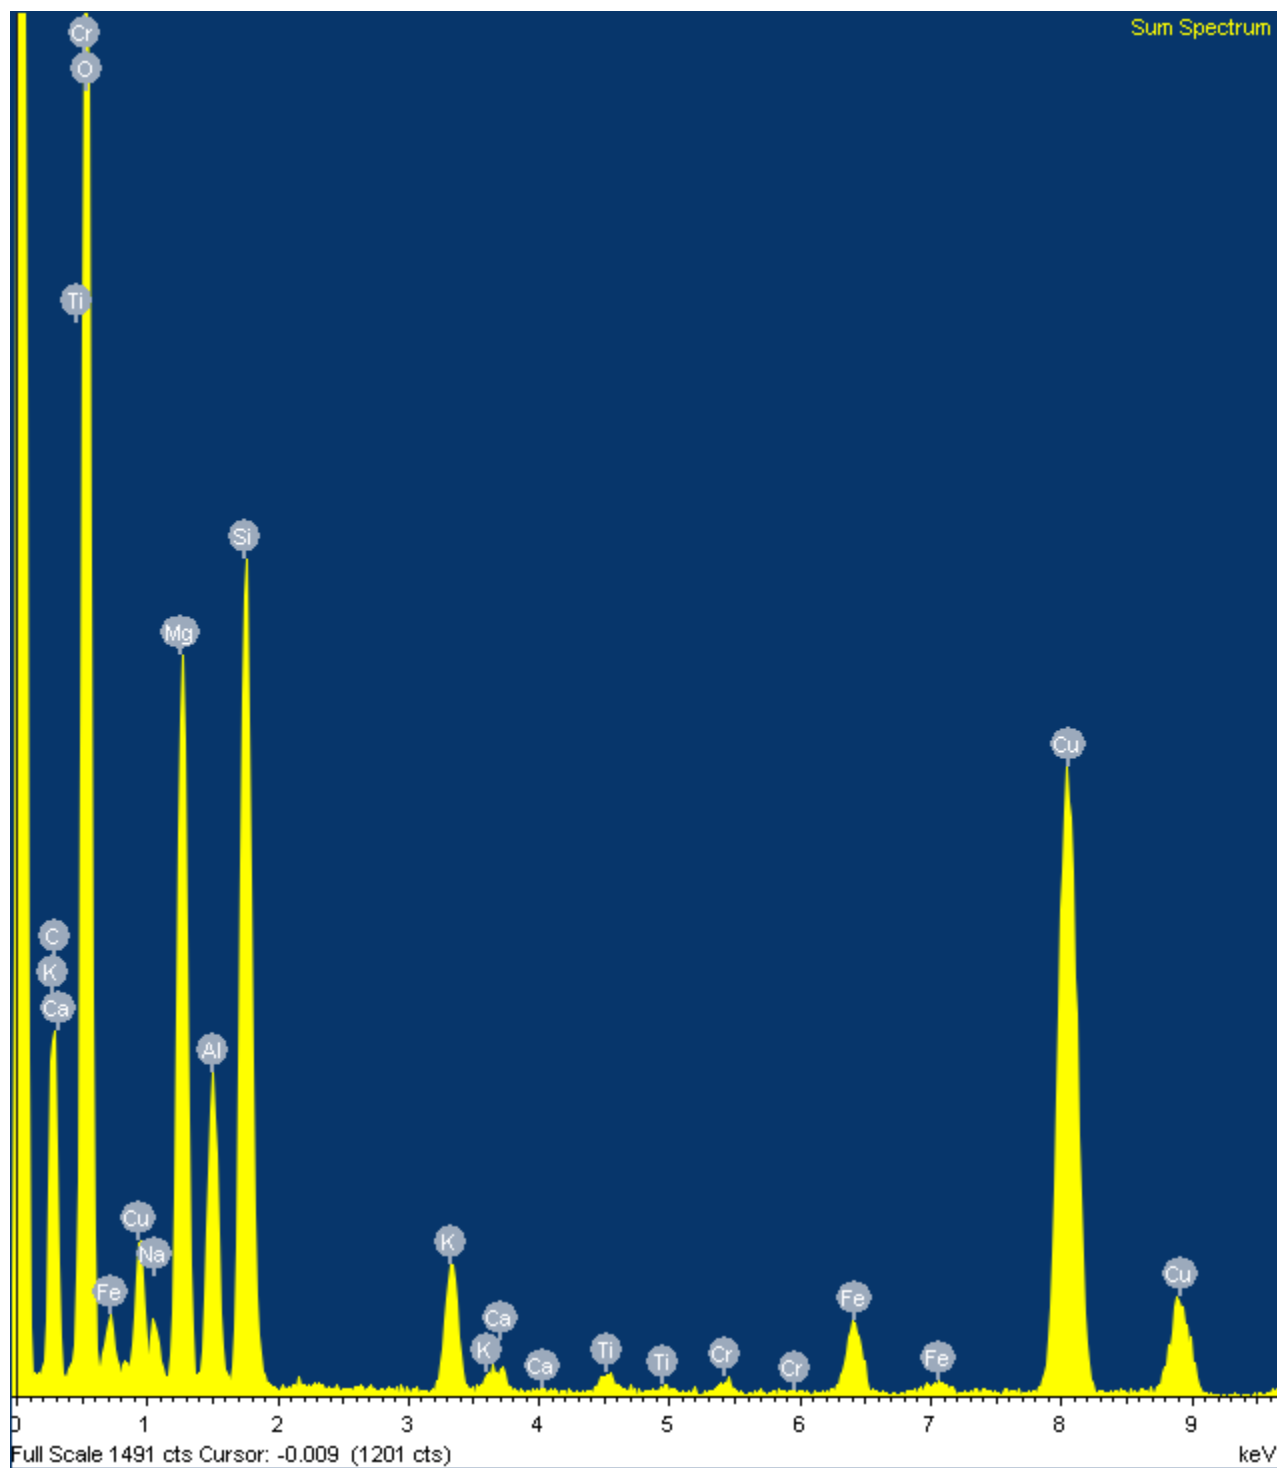

Comment:

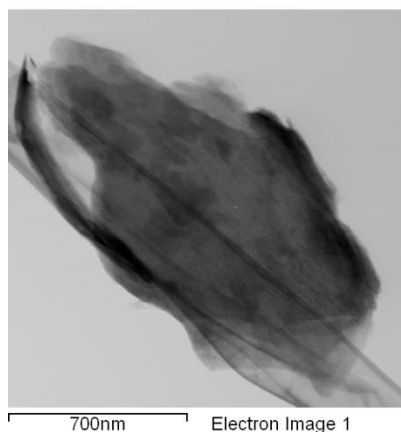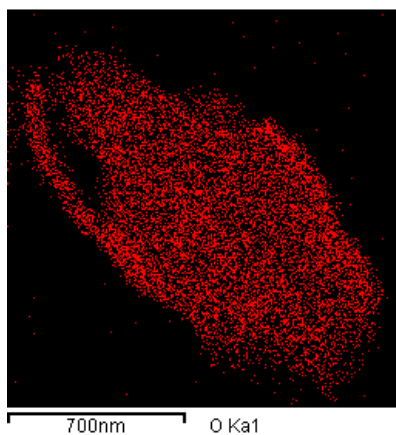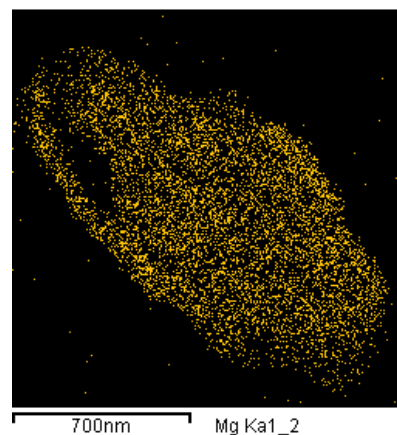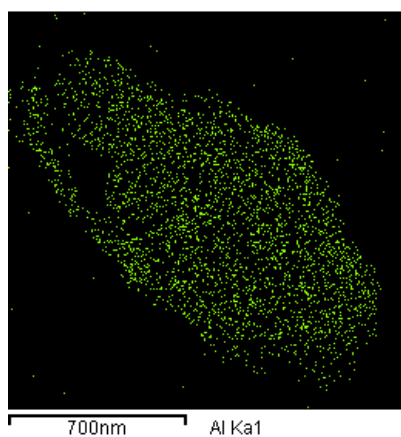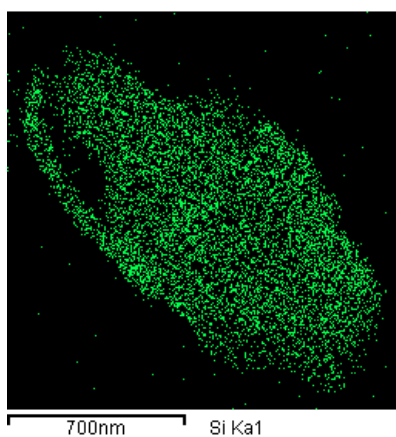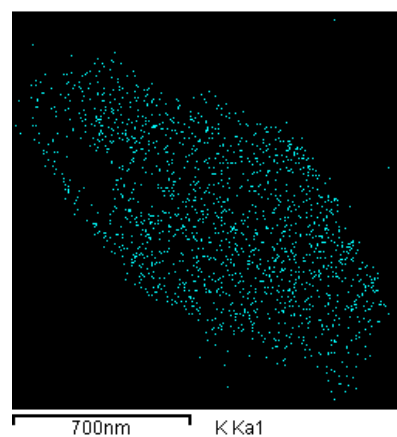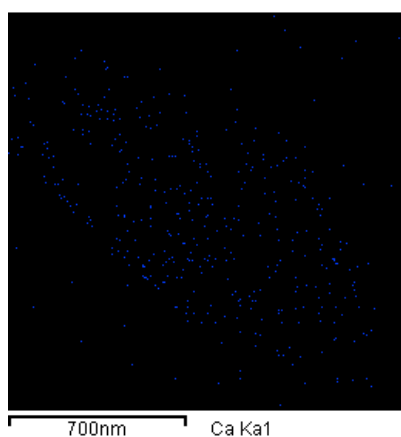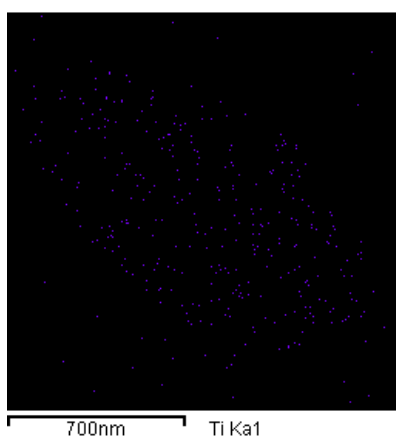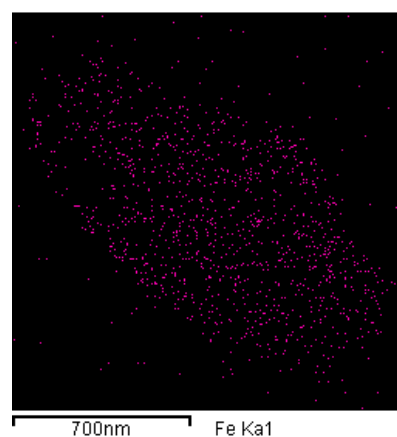

Comment:

Project: Project 1

Owner: INCA

Sample: CHG-4B-MW-No

Type: Default

| Element | Peak  | Area  | k      | Abs   | Weight% | Weight% | Atomic% |
|---------|-------|-------|--------|-------|---------|---------|---------|
|         | Area  | Sigma | factor | Corn. |         | Sigma   |         |
| O K     | 23853 | 288   | 1.065  | 1.000 | 51.19   | 0.38    | 64.92   |
| Mg K    | 13181 | 202   | 0.606  | 1.000 | 16.09   | 0.24    | 13.43   |
| Al K    | 5324  | 149   | 0.589  | 1.000 | 6.32    | 0.17    | 4.76    |
| Si K    | 16015 | 226   | 0.569  | 1.000 | 18.37   | 0.25    | 13.27   |
| K K     | 3462  | 109   | 0.552  | 1.000 | 3.85    | 0.12    | 2.00    |
| Ca K    | 535   | 62    | 0.542  | 1.000 | 0.58    | 0.07    | 0.30    |
| Ti K    | 436   | 56    | 0.608  | 1.000 | 0.53    | 0.07    | 0.23    |
| Fe K    | 2241  | 89    | 0.678  | 1.000 | 3.06    | 0.12    | 1.11    |
| Totals  |       |       |        |       | 100.00  |         |         |

Project: Project 1

Owner: INCA

Sample: CHG-4B-MW-No

Type: Default

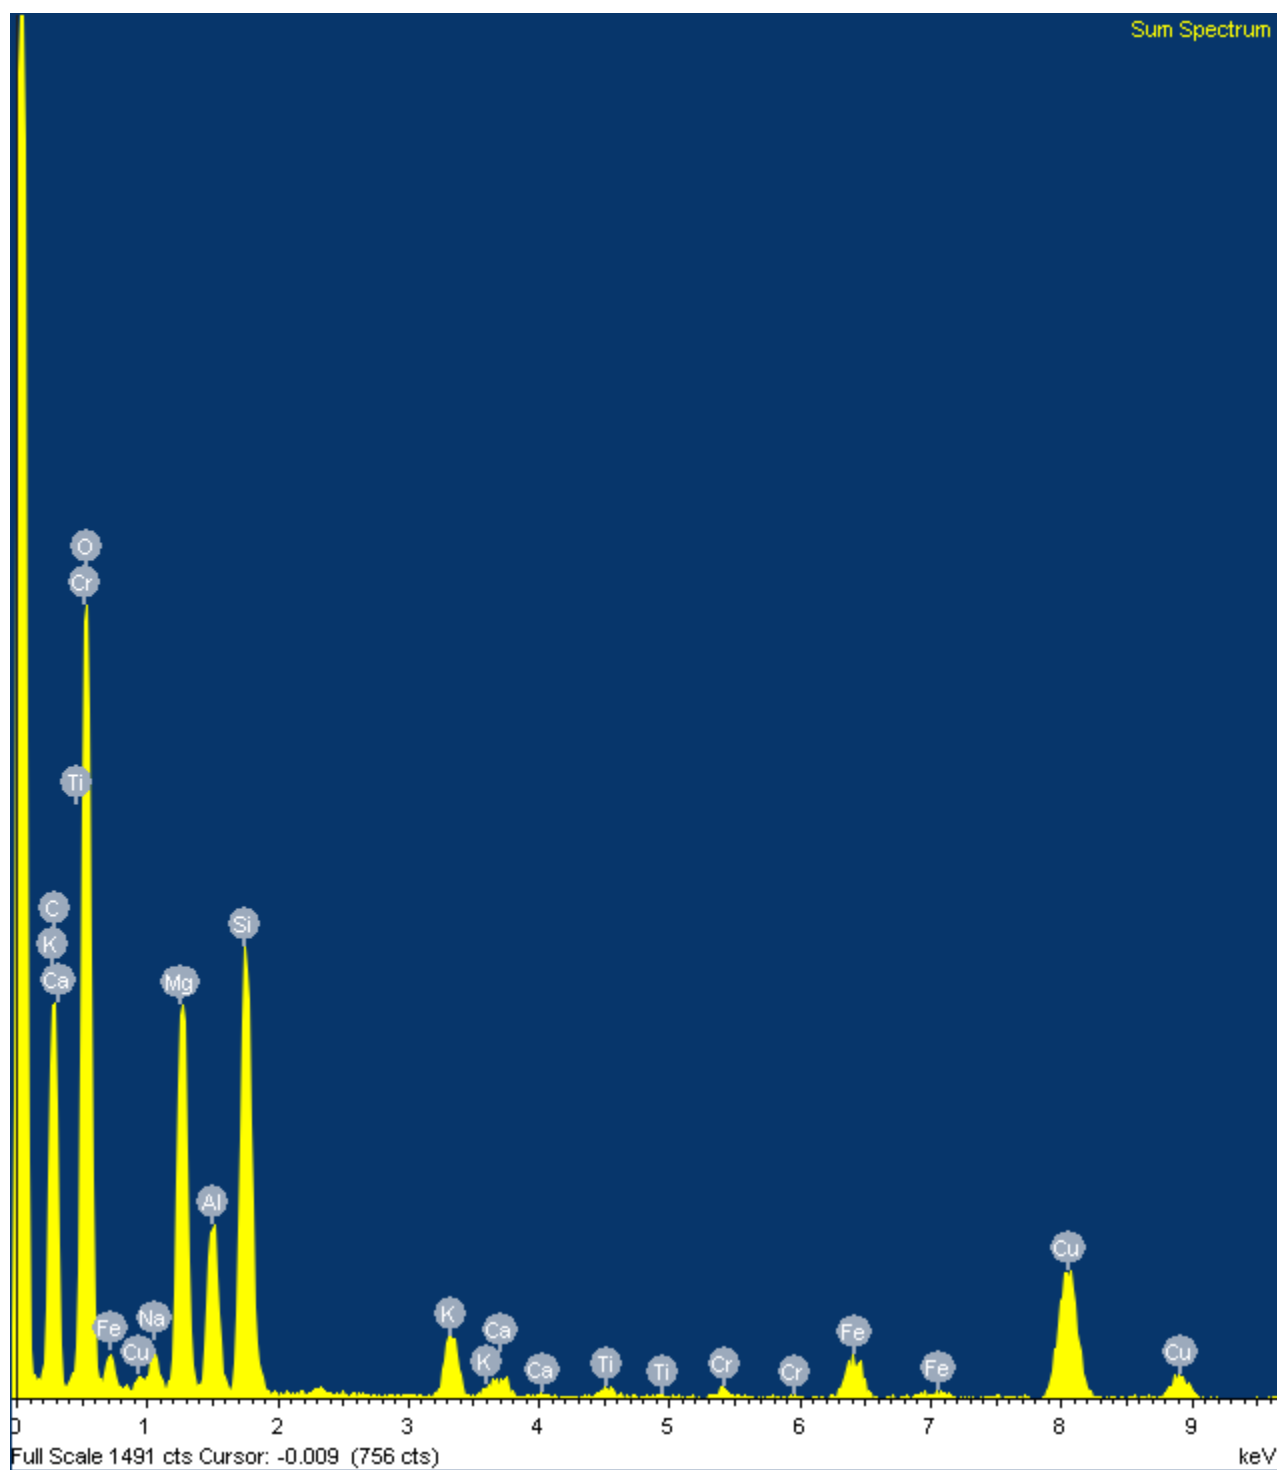

Comment:

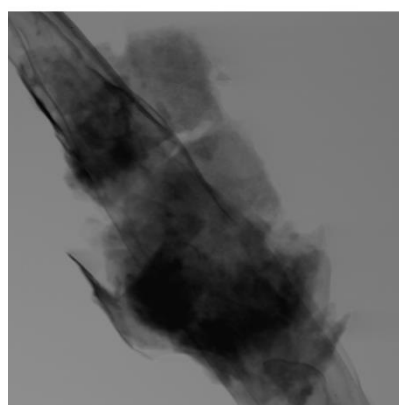

1µm Electron Image 1

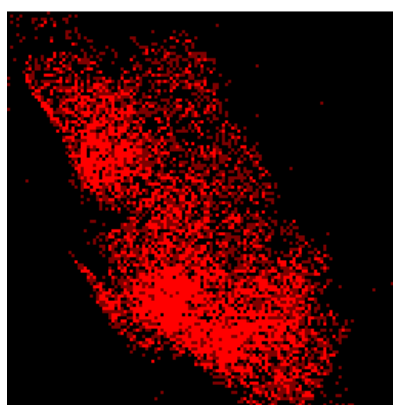

1µm O Ka1

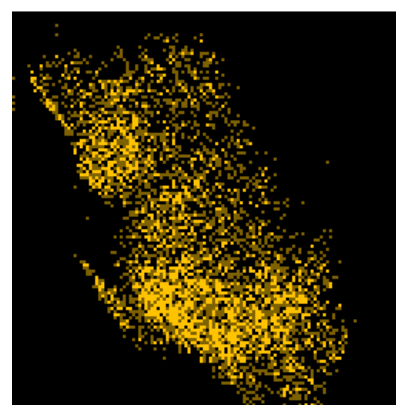

1µm Mg Ka1\_2

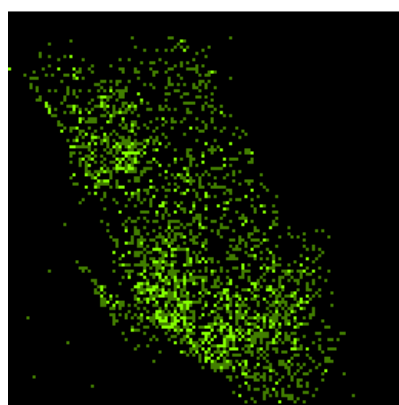

1µm Al Ka1

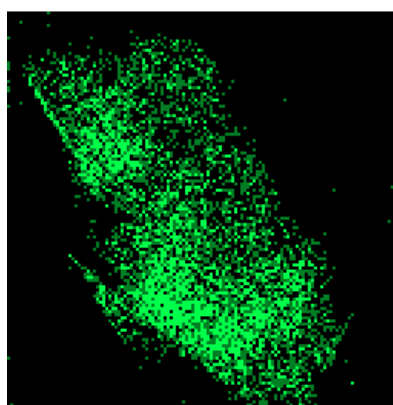

1µm Si Ka1

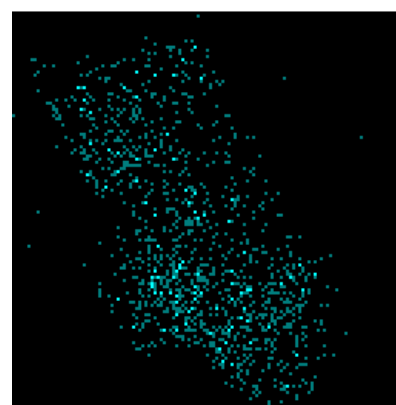

1µm K Ka1

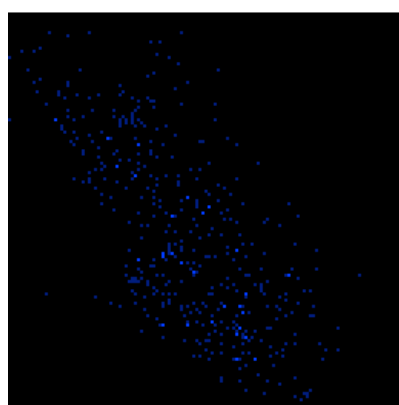

1µm Ca Ka1

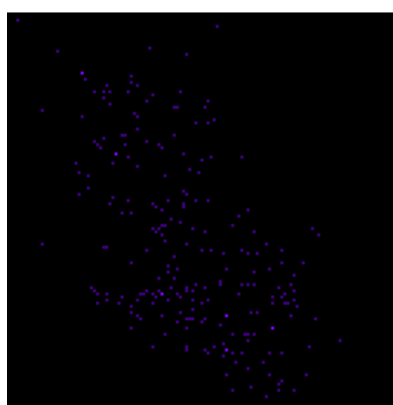

1µm Ti Ka1

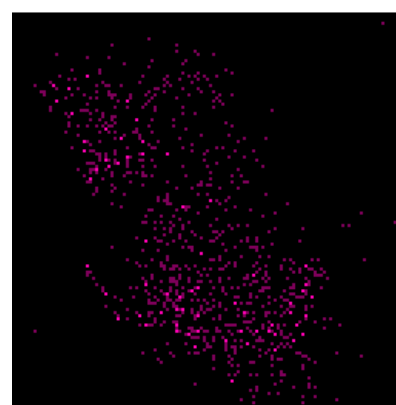

1µm Fe Ka1

Comment:

Project: Project 1

Owner: INCA

Sample: CHG-4B-MW-No

Type: Default

| Element | Peak  | Area  | k      | Abs   | Weight% | Weight% | Atomic% |
|---------|-------|-------|--------|-------|---------|---------|---------|
|         | Area  | Sigma | factor | Corn. |         | Sigma   |         |
| O K     | 13272 | 213   | 1.065  | 1.000 | 51.50   | 0.50    | 65.20   |
| Mg K    | 7179  | 149   | 0.606  | 1.000 | 15.84   | 0.32    | 13.20   |
| Al K    | 3033  | 112   | 0.589  | 1.000 | 6.52    | 0.23    | 4.89    |
| Si K    | 8805  | 168   | 0.569  | 1.000 | 18.26   | 0.33    | 13.17   |
| K K     | 1682  | 77    | 0.552  | 1.000 | 3.38    | 0.15    | 1.75    |
| Ca K    | 482   | 52    | 0.542  | 1.000 | 0.95    | 0.10    | 0.48    |
| Ti K    | 230   | 38    | 0.608  | 1.000 | 0.51    | 0.08    | 0.22    |
| Fe K    | 1227  | 65    | 0.678  | 1.000 | 3.03    | 0.16    | 1.10    |
| Totals  |       |       |        |       | 100.00  |         |         |

Project: Project 1

Owner: INCA

Sample: CHG-4B-MW-No

Type: Default

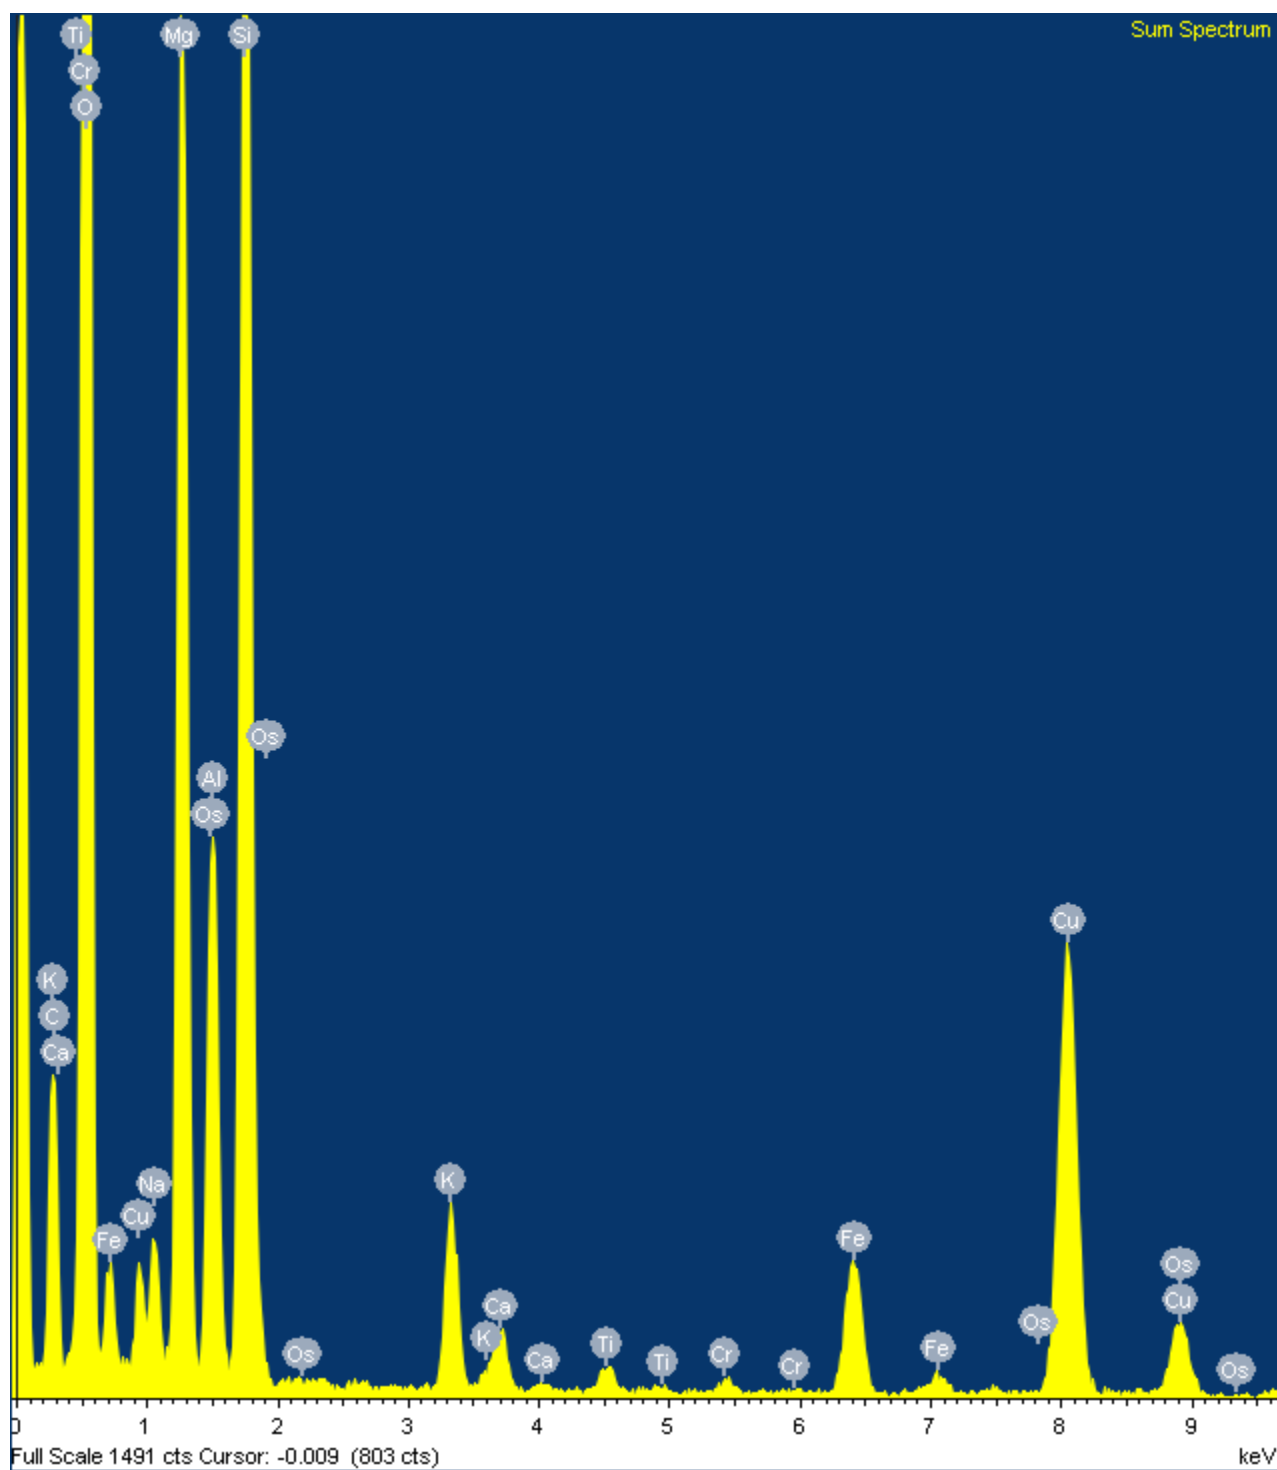

Comment:



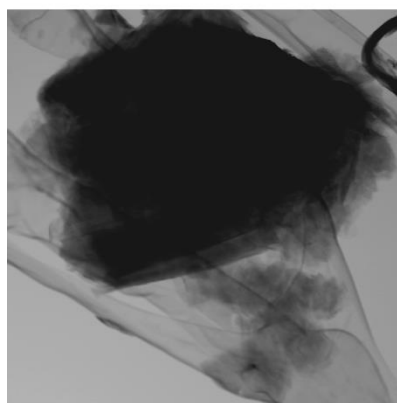

1µm

Electron Image 1

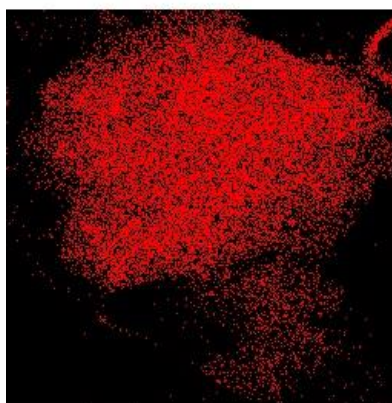

1µm

O Ka1

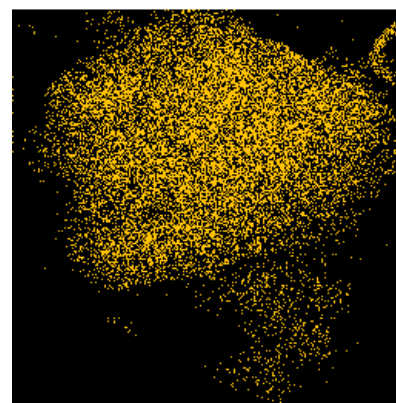

1µm

Mg Ka1\_2

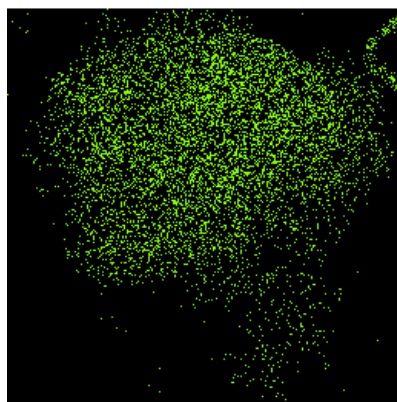

1µm

Al Ka1

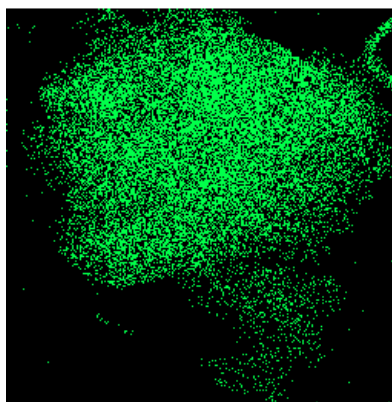

1µm

Si Ka1

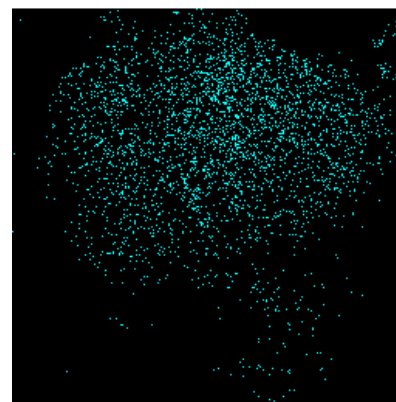

1µm

K Ka1

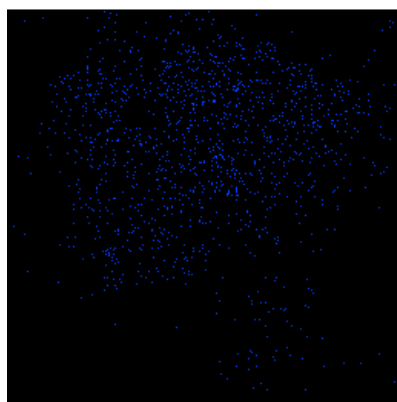

1µm

Ca Ka1

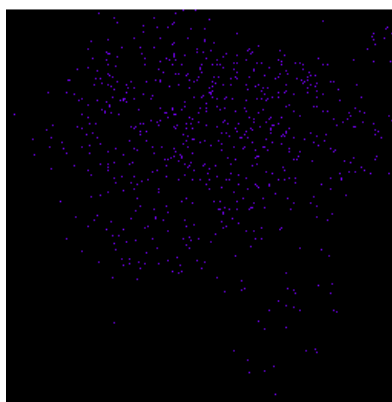

1µm

Ti Ka1

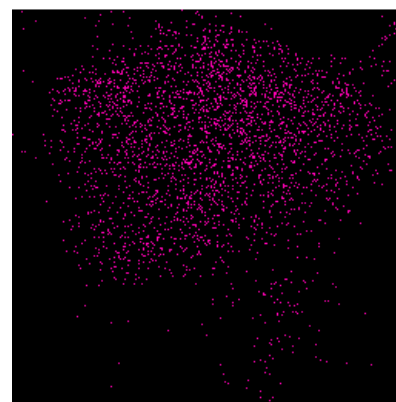

1µm

Fe Ka1

Comment:

Project: Project 1

Owner: INCA

Sample: CHG-4B-MW-No

Type: Default

| Element | Peak  | Area  | k      | Abs   | Weight% | Weight% | Atomic% |
|---------|-------|-------|--------|-------|---------|---------|---------|
|         | Area  | Sigma | factor | Corn. |         | Sigma   |         |
| O K     | 42465 | 379   | 1.065  | 1.000 | 49.24   | 0.28    | 63.08   |
| Mg K    | 25160 | 281   | 0.606  | 1.000 | 16.59   | 0.18    | 13.99   |
| Al K    | 9962  | 202   | 0.589  | 1.000 | 6.39    | 0.13    | 4.86    |
| Si K    | 32276 | 319   | 0.569  | 1.000 | 20.00   | 0.19    | 14.60   |
| K K     | 4824  | 132   | 0.552  | 1.000 | 2.90    | 0.08    | 1.52    |
| Ca K    | 1690  | 91    | 0.542  | 1.000 | 1.00    | 0.05    | 0.51    |
| Ti K    | 771   | 68    | 0.608  | 1.000 | 0.51    | 0.04    | 0.22    |
| Fe K    | 4554  | 121   | 0.678  | 1.000 | 3.36    | 0.09    | 1.23    |
| Totals  |       |       |        |       | 100.00  |         |         |
