# Supplementary material for: Heterogeneous Distribution of Interlayer Cations and Iron as a Plausible Explanation of the Non-Exfoliation of Commercial Vermiculites Post Alcohol Treatment and Microwave Irradiation
Source: MDPI journal article supplement (doi:10.3390/min11080835), 2021-08-01
Supplement: s1 [file s1]

Project: Project 1

Owner: INCA

Sample: CHG-4E-MW-Ex

Type: Default

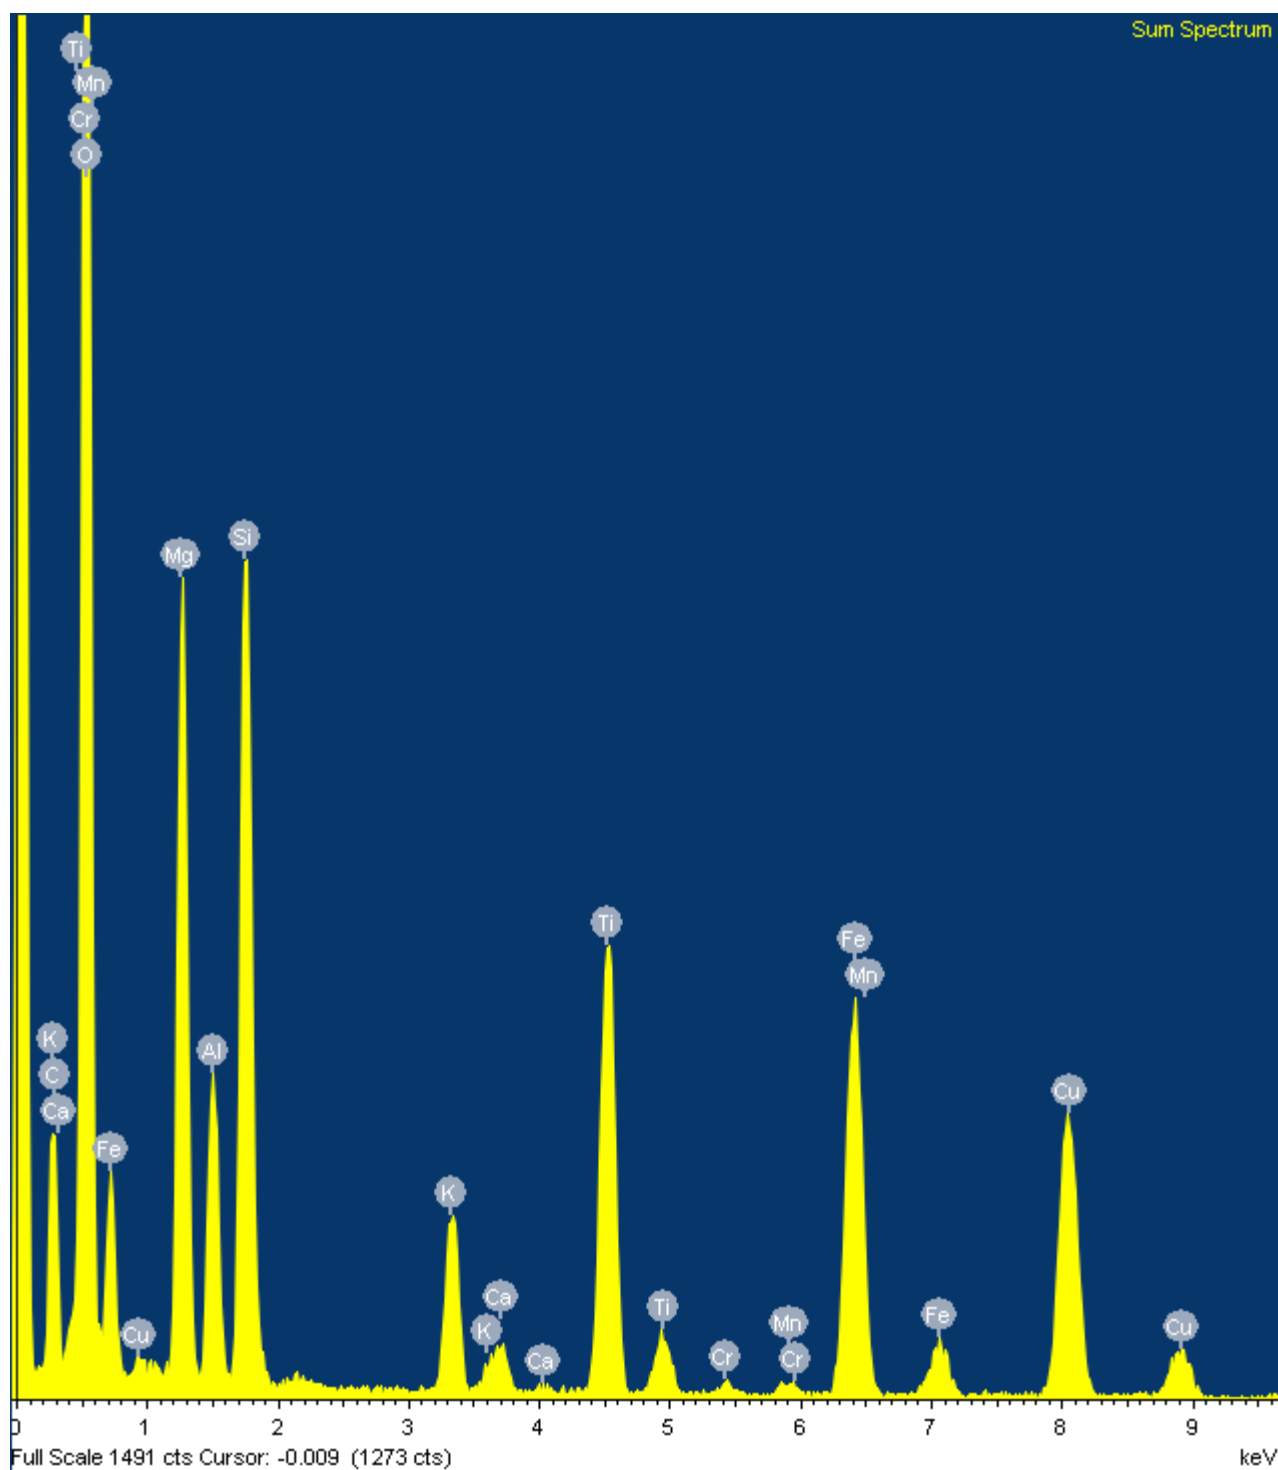

Comment:

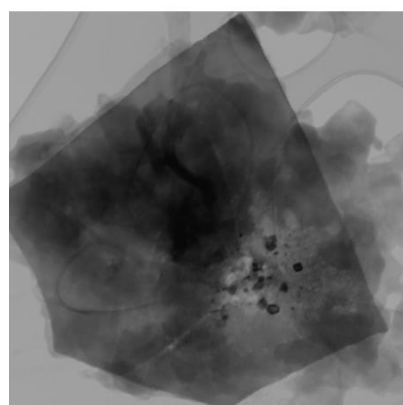

600nm Electron Image 1

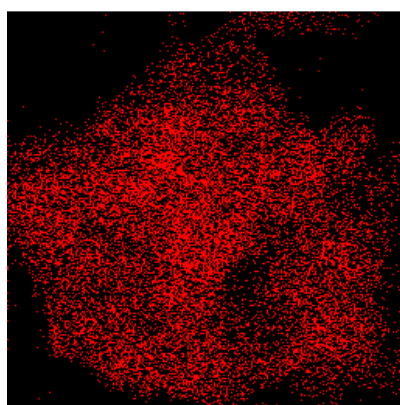

600nm O Ka1

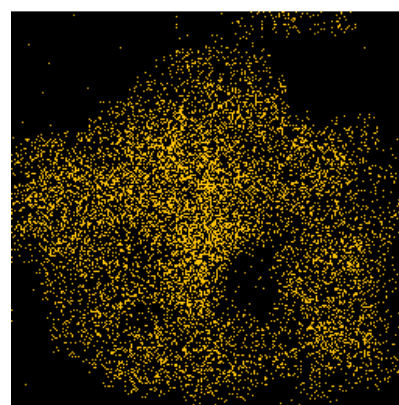

600nm Mg Ka1\_2

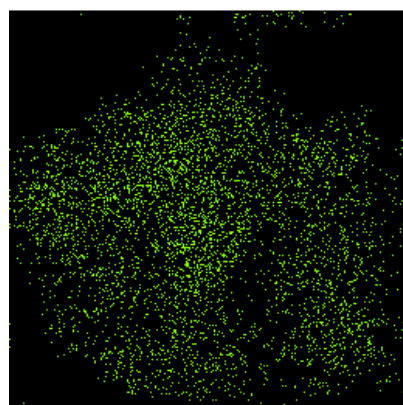

600nm Al Ka1

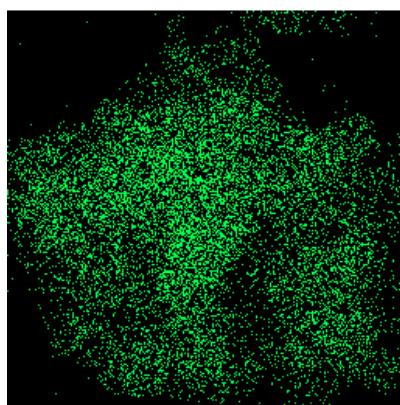

600nm Si Ka1

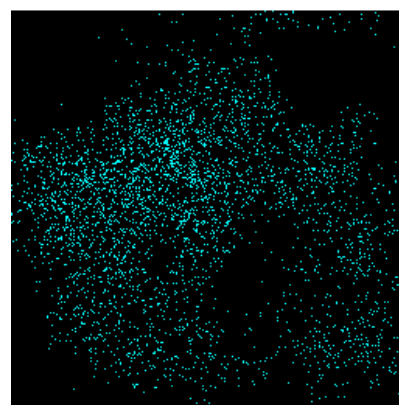

600nm K Ka1

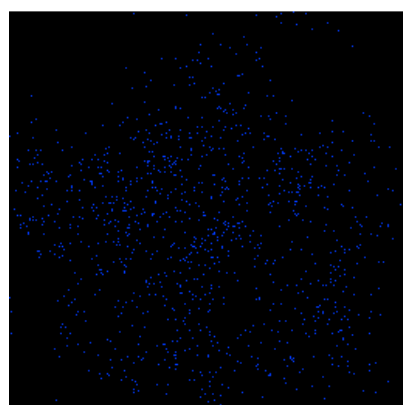

600nm Ca Ka1

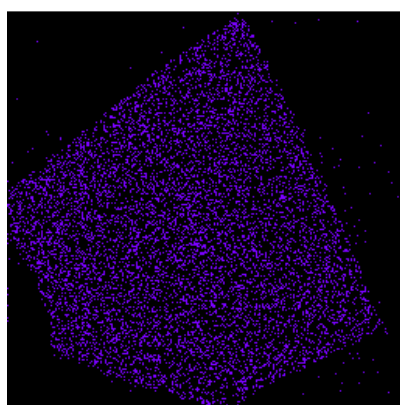

600nm Ti Ka1

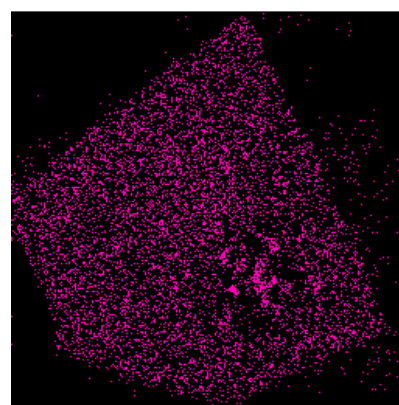

600nm Fe Ka1

Comment:

Project: Project 1

Owner: INCA

Sample: CHG-4E-MW-Ex

Type: Default

| Element | Peak  | Area  | k      | Abs    | Weight% | Weight% | Atomic% |
|---------|-------|-------|--------|--------|---------|---------|---------|
|         | Area  | Sigma | factor | Corrn. |         | Sigma   |         |
| O K     | 28507 | 323   | 1.065  | 1.000  | 41.92   | 0.32    | 60.62   |
| Mg K    | 13941 | 213   | 0.606  | 1.000  | 11.66   | 0.17    | 11.09   |
| Al K    | 5685  | 155   | 0.589  | 1.000  | 4.63    | 0.12    | 3.97    |
| Si K    | 16751 | 236   | 0.569  | 1.000  | 13.16   | 0.18    | 10.84   |
| K K     | 5071  | 133   | 0.552  | 1.000  | 3.86    | 0.10    | 2.29    |
| Ca K    | 1196  | 85    | 0.542  | 1.000  | 0.90    | 0.06    | 0.52    |
| Ti K    | 13590 | 196   | 0.608  | 1.000  | 11.41   | 0.16    | 5.51    |
| Fe K    | 13314 | 193   | 0.678  | 1.000  | 12.46   | 0.17    | 5.16    |
| Totals  |       |       |        |        | 100.00  |         |         |

Project: Project 1

Owner: INCA

Sample: CHG-4E-MW-Ex

Type: Default

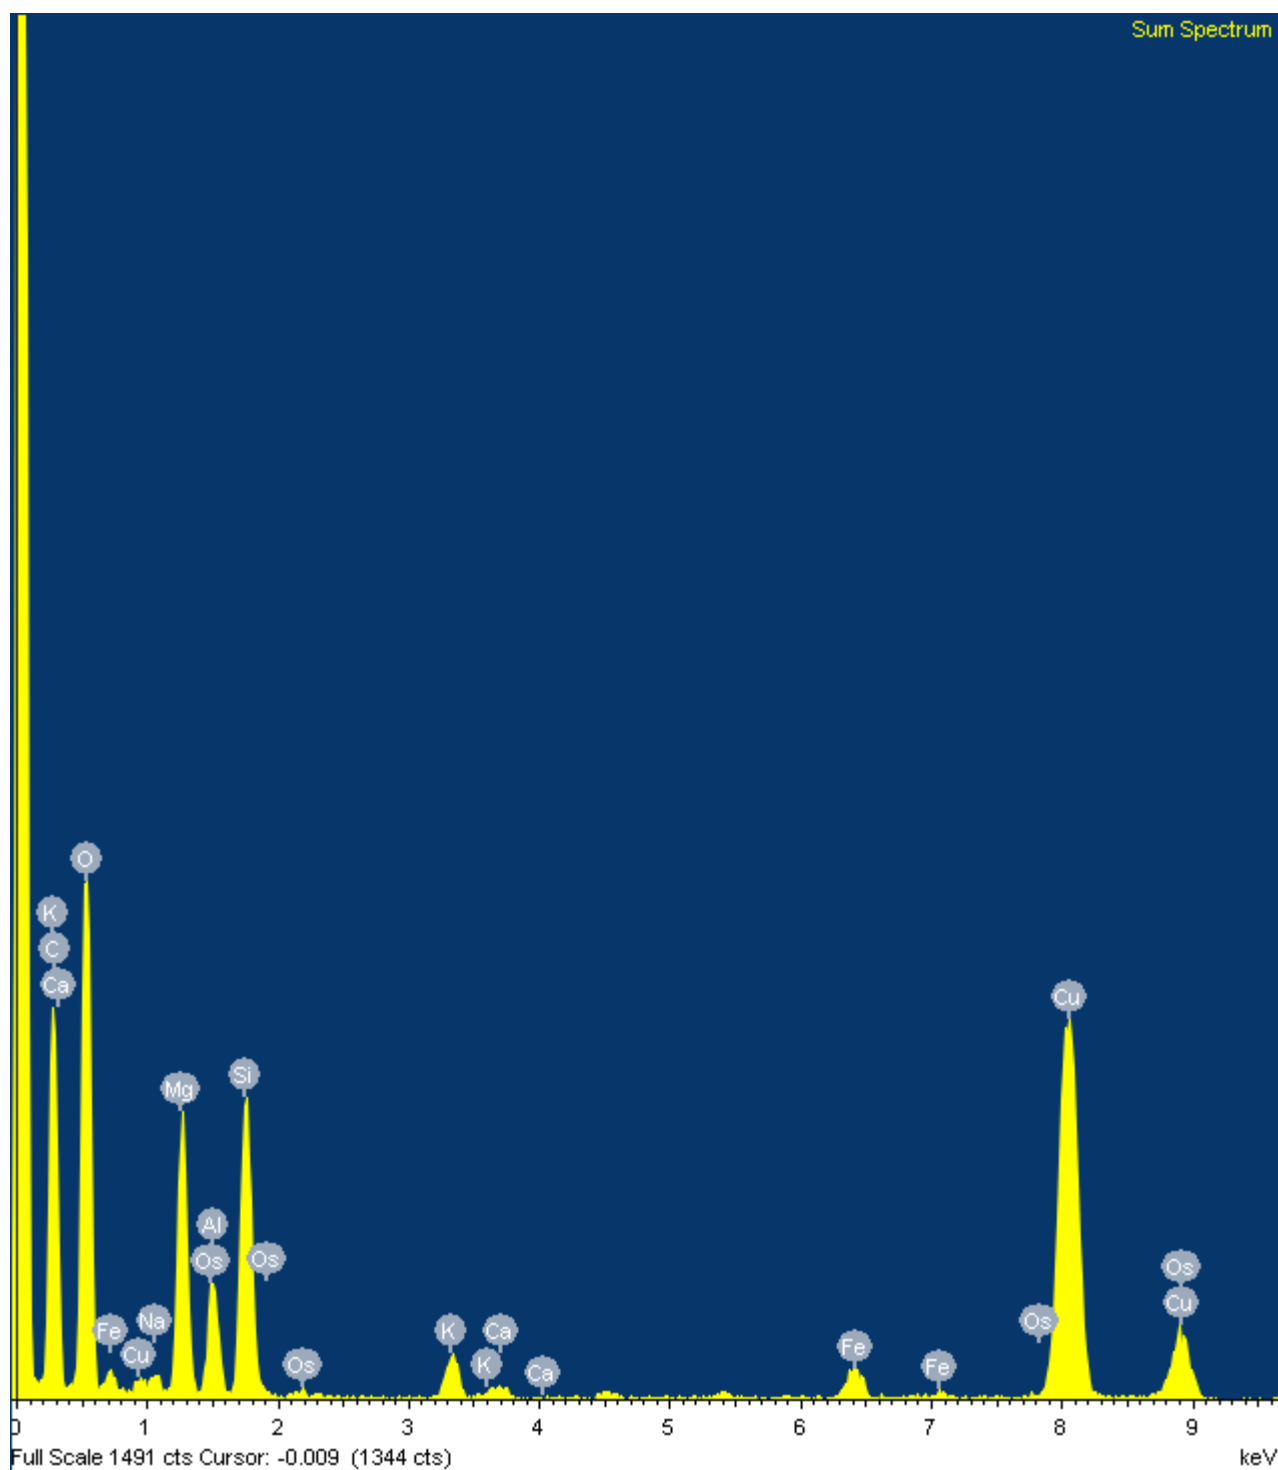

Comment:

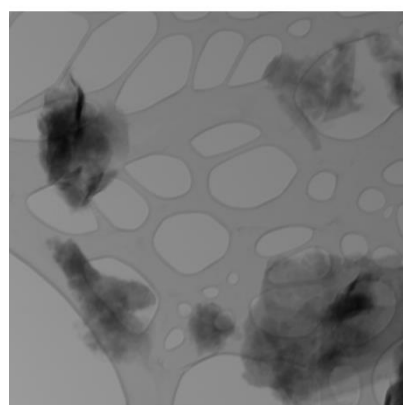

Electron Image 1

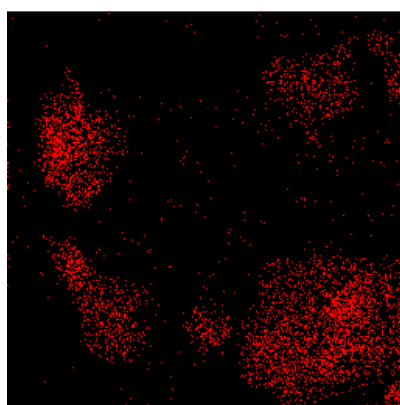

O Ka1

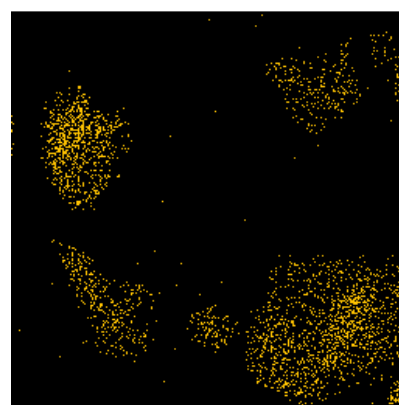

Mg Ka1\_2

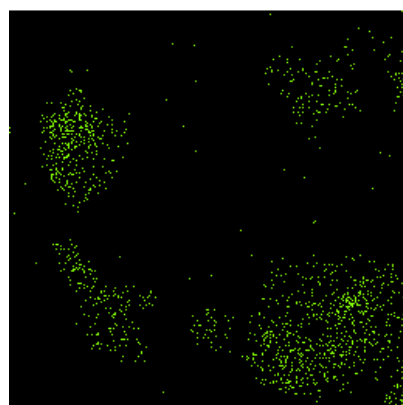

Al Ka1

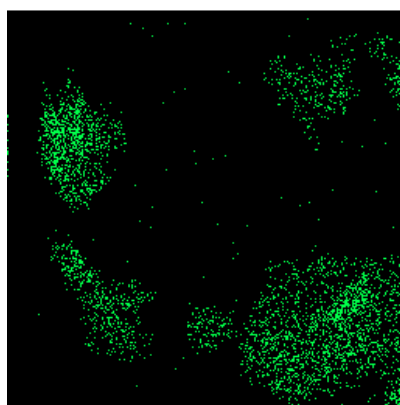

Si Ka1

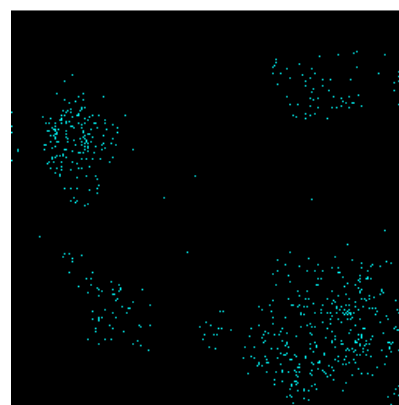

K Ka1

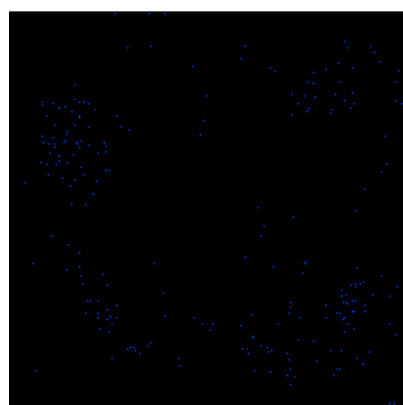

Ca Ka1

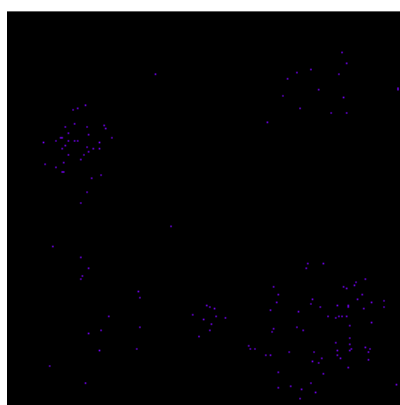

Ti Ka1

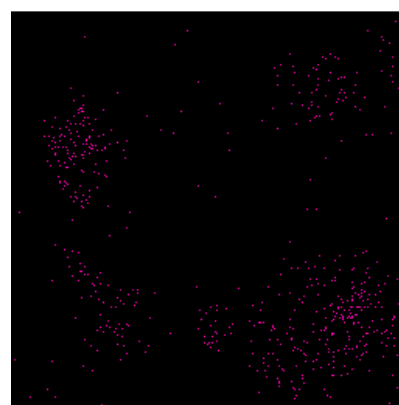

Fe Ka1

Comment:

Project: Project 1

Owner: INCA

Sample: CHG-4E-MW-Ex

Type: Default

| Element | Peak | Area  | k      | Abs    | Weight% | Weight% | Atomic% |
|---------|------|-------|--------|--------|---------|---------|---------|
|         | Area | Sigma | factor | Corrn. |         | Sigma   |         |
| O K     | 8832 | 175   | 1.065  | 1.000  | 51.35   | 0.62    | 65.18   |
| Mg K    | 4676 | 121   | 0.606  | 1.000  | 15.46   | 0.39    | 12.91   |
| Al K    | 2006 | 91    | 0.589  | 1.000  | 6.46    | 0.28    | 4.86    |
| Si K    | 5956 | 139   | 0.569  | 1.000  | 18.51   | 0.41    | 13.38   |
| K K     | 1104 | 64    | 0.552  | 1.000  | 3.33    | 0.19    | 1.73    |
| Ca K    | 277  | 41    | 0.542  | 1.000  | 0.82    | 0.12    | 0.41    |
| Ti K    | 179  | 34    | 0.608  | 1.000  | 0.59    | 0.11    | 0.25    |
| Fe K    | 941  | 59    | 0.678  | 1.000  | 3.48    | 0.21    | 1.27    |
| Totals  |      |       |        |        | 100.00  |         |         |

Project: Project 1

Owner: INCA

Sample: CHG-4E-MW-Ex

Type: Default

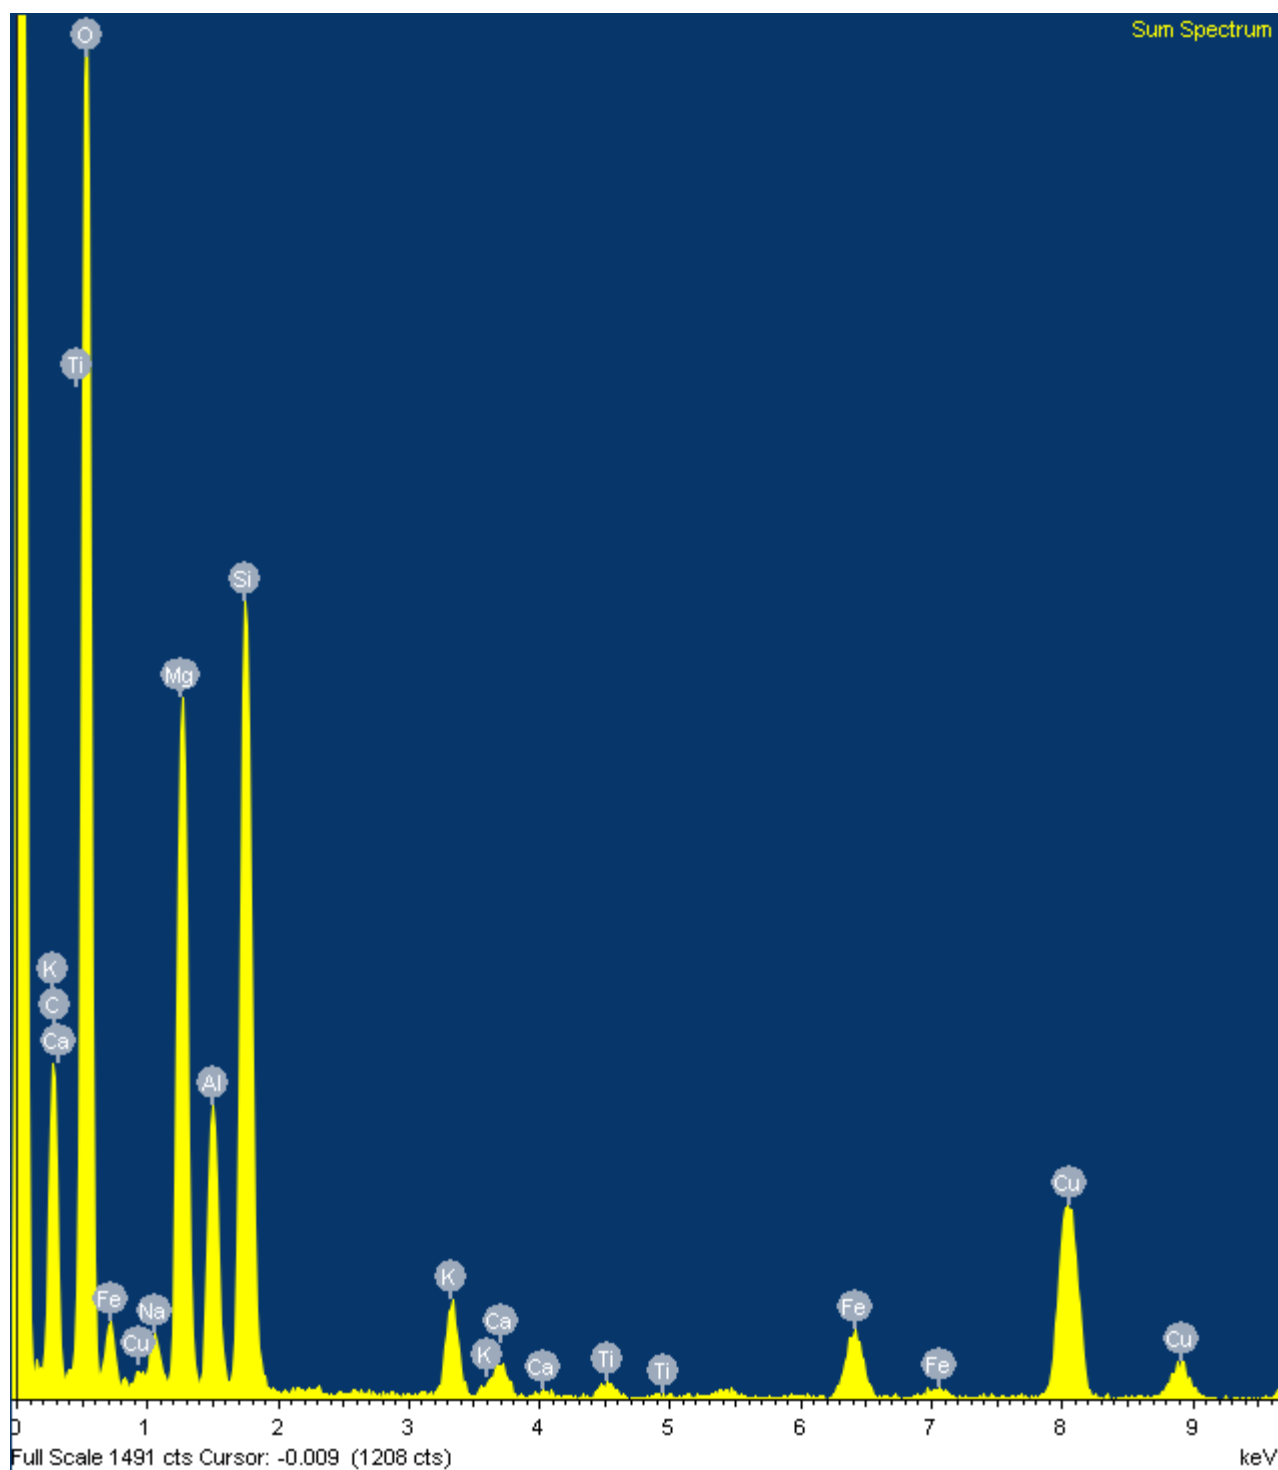

Comment:

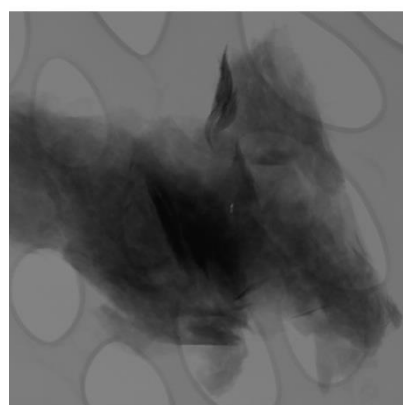

500nm Electron Image 1

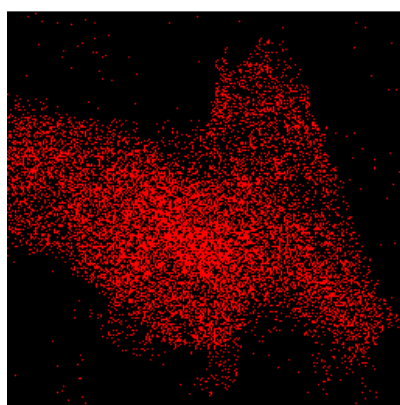

500nm O Ka1

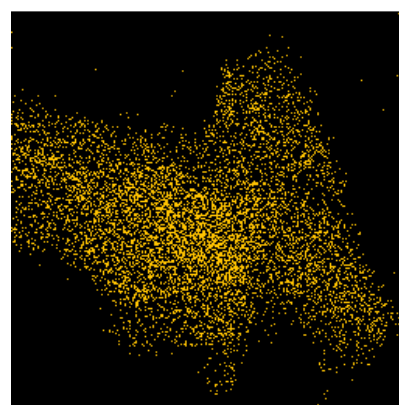

500nm Mg Ka1\_2

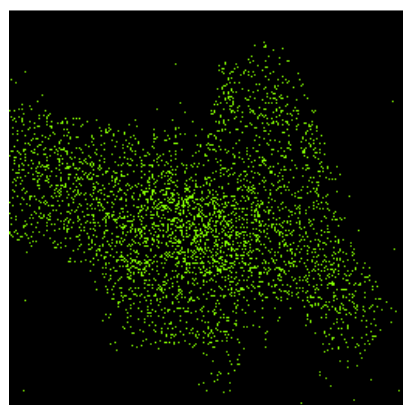

500nm Al Ka1

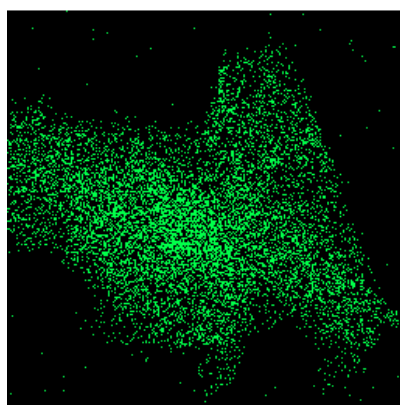

500nm Si Ka1

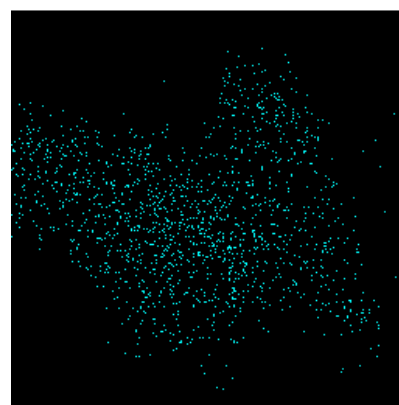

500nm K Ka1

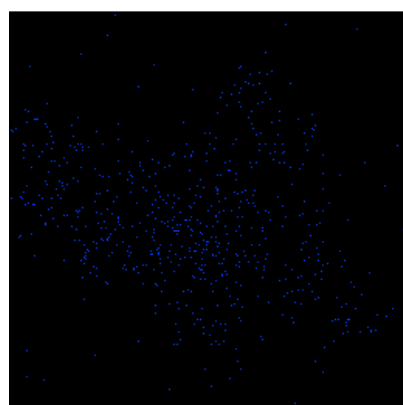

500nm Ca Ka1

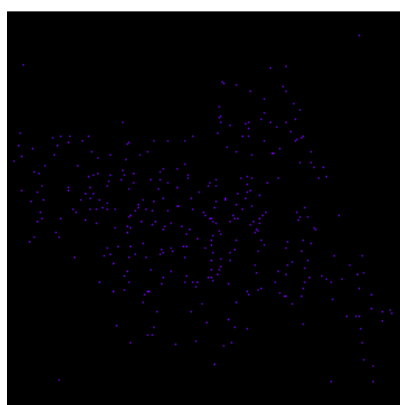

500nm Ti Ka1

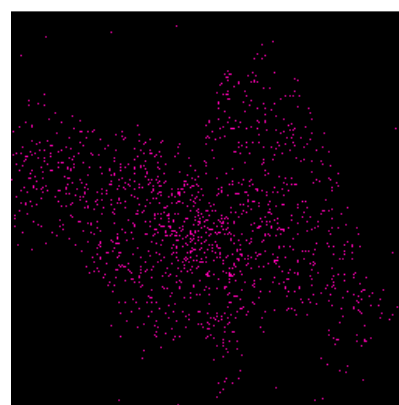

500nm Fe Ka1

Comment:



Project: Project 1

Owner: INCA

Sample: CHG-4E-MW-Ex

Type: Default

| Element | Peak  | Area  | k      | Abs   | Weight% | Weight% | Atomic% |
|---------|-------|-------|--------|-------|---------|---------|---------|
|         | Area  | Sigma | factor | Corn. |         | Sigma   |         |
| O K     | 22665 | 279   | 1.065  | 1.000 | 51.12   | 0.38    | 64.76   |
| Mg K    | 12498 | 198   | 0.606  | 1.000 | 16.03   | 0.24    | 13.36   |
| Al K    | 5161  | 144   | 0.589  | 1.000 | 6.44    | 0.18    | 4.84    |
| Si K    | 15829 | 223   | 0.569  | 1.000 | 19.08   | 0.26    | 13.77   |
| K K     | 2424  | 93    | 0.552  | 1.000 | 2.83    | 0.11    | 1.47    |
| Ca K    | 844   | 65    | 0.542  | 1.000 | 0.97    | 0.07    | 0.49    |
| Ti K    | 393   | 48    | 0.608  | 1.000 | 0.51    | 0.06    | 0.21    |
| Fe K    | 2098  | 85    | 0.678  | 1.000 | 3.01    | 0.12    | 1.09    |
| Totals  |       |       |        |       | 100.00  |         |         |

Project: Project 1

Owner: INCA

Sample: CHG-4E-MW-Ex

Type: Default

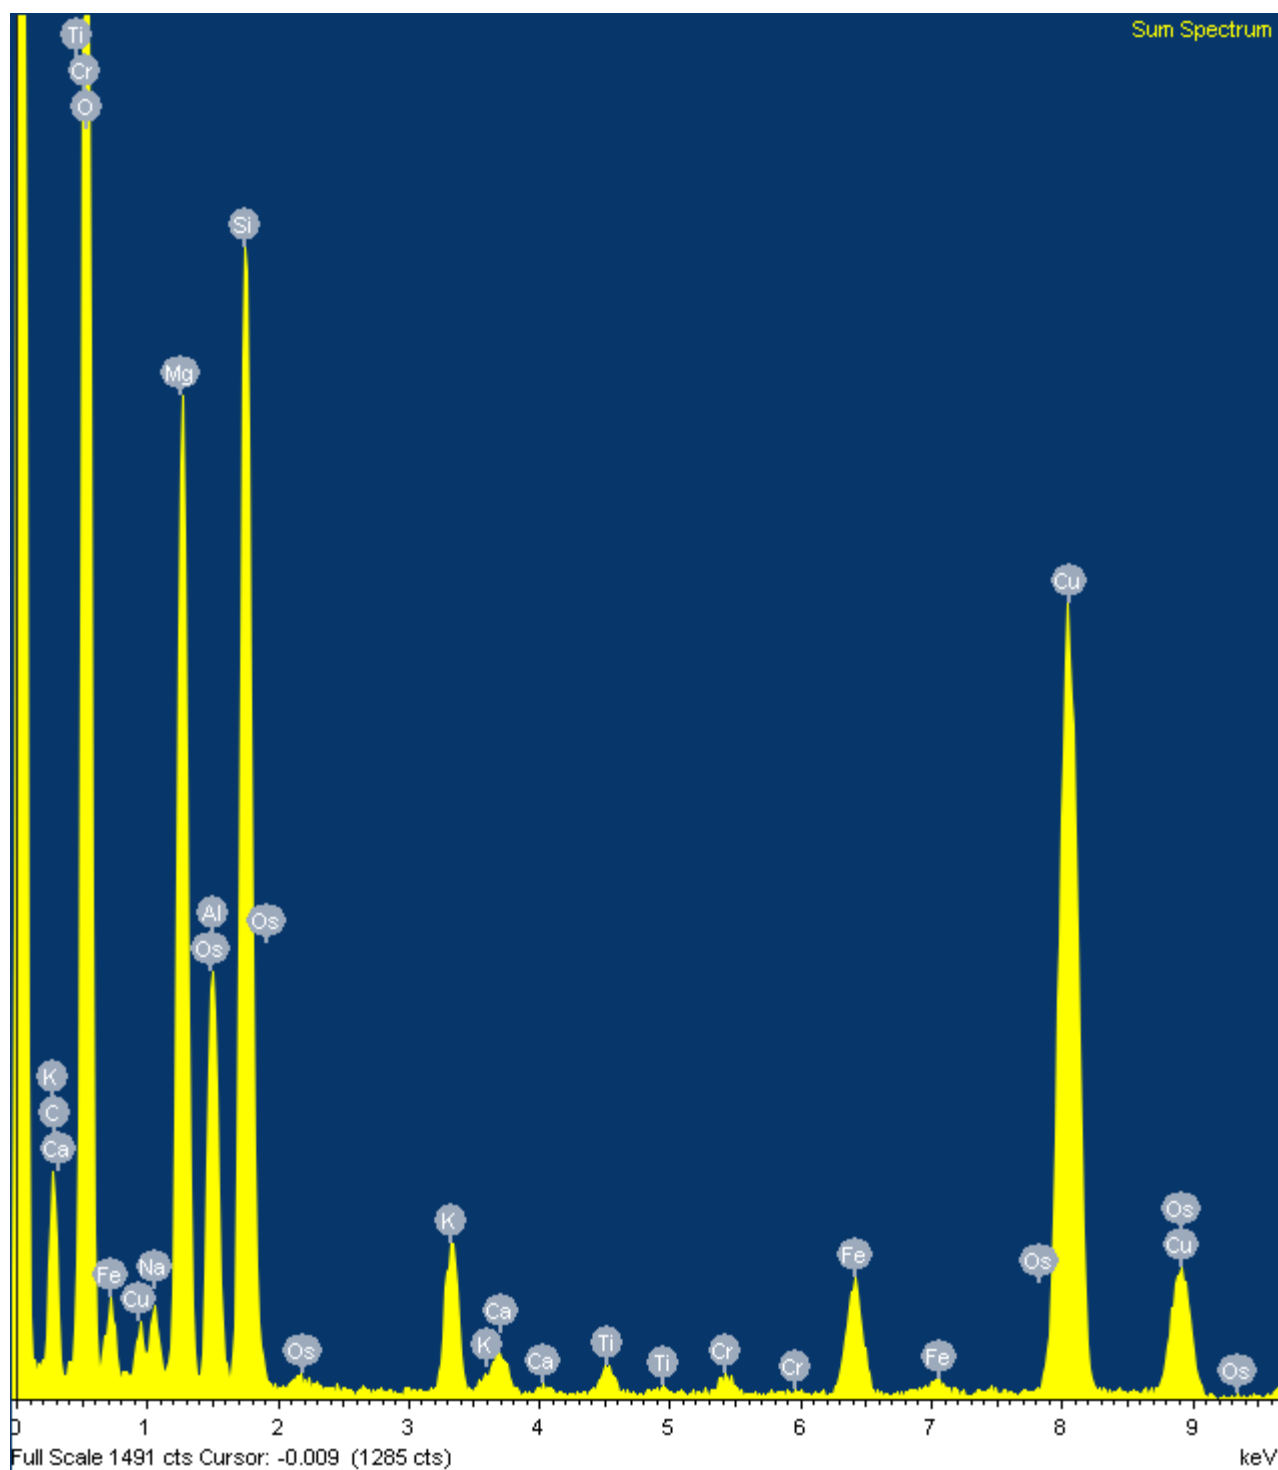

Comment:

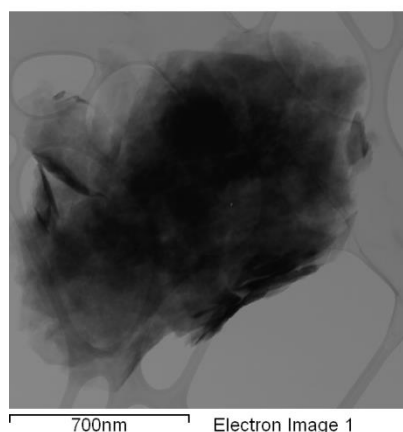

700nm

Electron Image 1

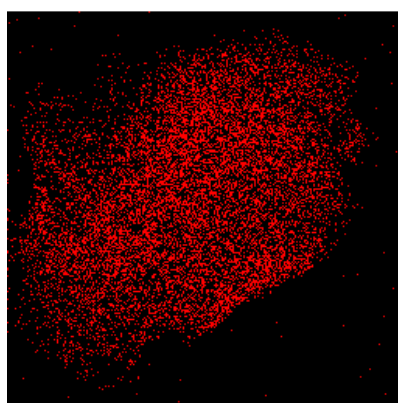

700nm

O Ka1

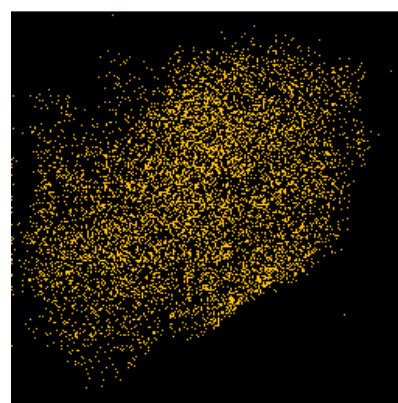

700nm

Mg Ka1\_2

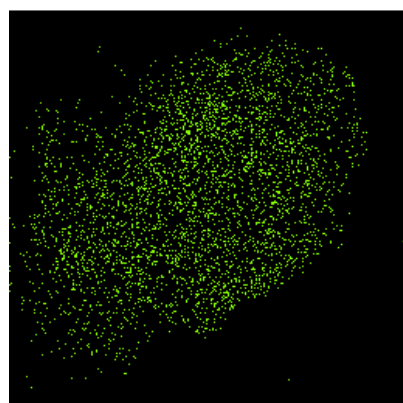

700nm

Al Ka1

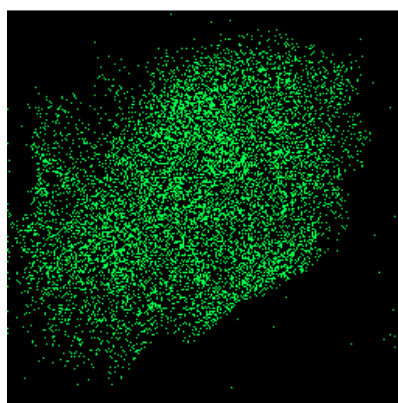

700nm

Si Ka1

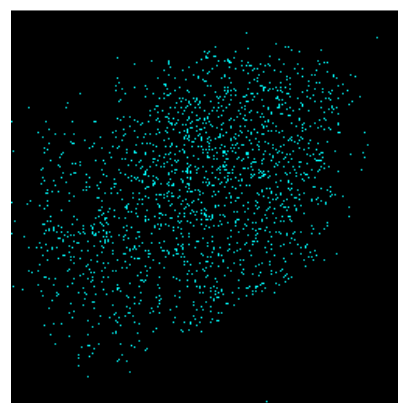

700nm

K Ka1

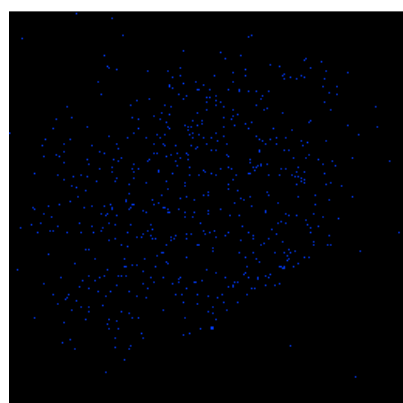

700nm

Ca Ka1

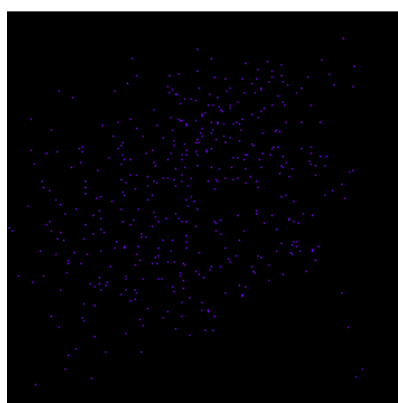

700nm

Ti Ka1

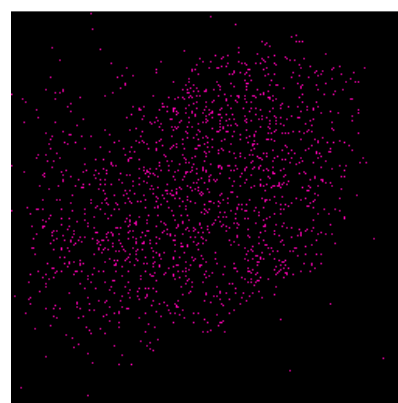

700nm

Fe Ka1

Comment:

Project: Project 1

Owner: INCA

Sample: CHG-4E-MW-Ex

Type: Default

| Element | Peak  | Area  | k      | Abs   | Weight% | Weight% | Atomic% |
|---------|-------|-------|--------|-------|---------|---------|---------|
|         | Area  | Sigma | factor | Corn. |         | Sigma   |         |
| O K     | 29956 | 319   | 1.065  | 1.000 | 48.48   | 0.33    | 62.56   |
| Mg K    | 17717 | 236   | 0.606  | 1.000 | 16.31   | 0.21    | 13.85   |
| Al K    | 7523  | 174   | 0.589  | 1.000 | 6.74    | 0.15    | 5.16    |
| Si K    | 22763 | 269   | 0.569  | 1.000 | 19.69   | 0.22    | 14.47   |
| K K     | 4156  | 122   | 0.552  | 1.000 | 3.49    | 0.10    | 1.84    |
| Ca K    | 1082  | 79    | 0.542  | 1.000 | 0.89    | 0.06    | 0.46    |
| Ti K    | 752   | 65    | 0.608  | 1.000 | 0.70    | 0.06    | 0.30    |
| Fe K    | 3602  | 111   | 0.678  | 1.000 | 3.71    | 0.11    | 1.37    |
| Totals  |       |       |        |       | 100.00  |         |         |

Project: Project 1

Owner: INCA

Sample: CHG-4E-MW-Ex

Type: Default

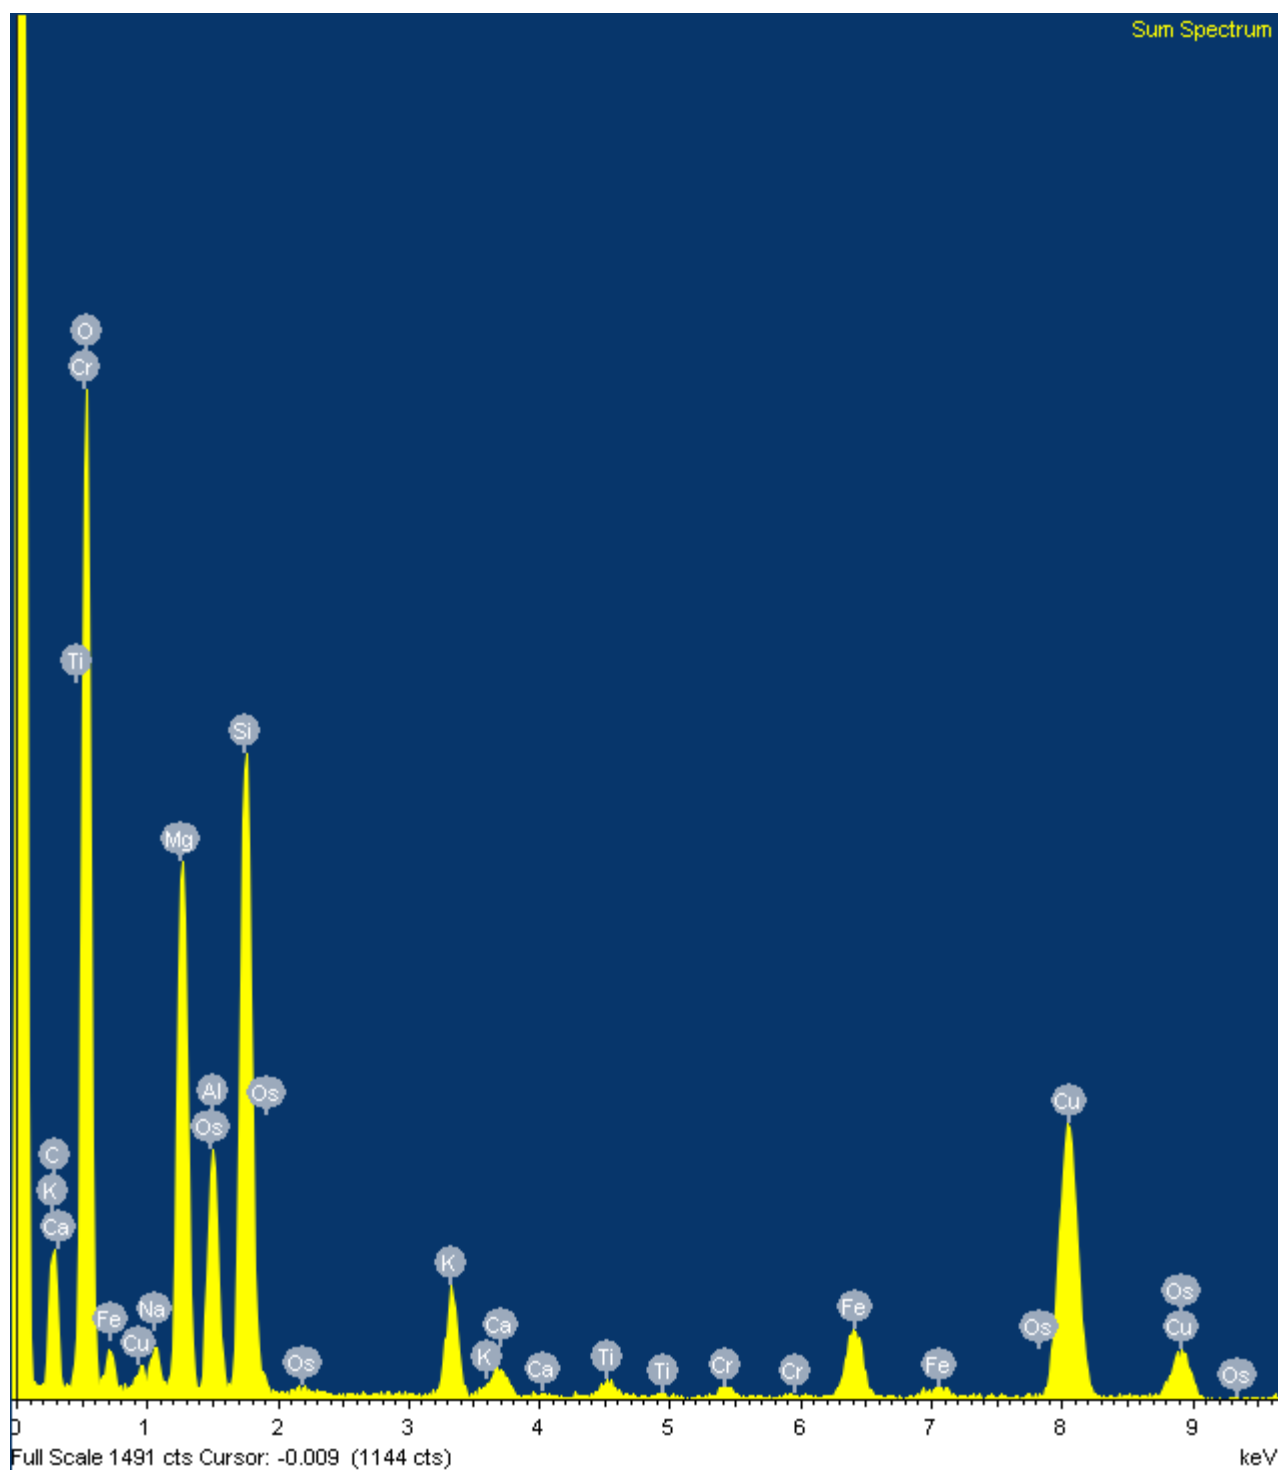

Comment:

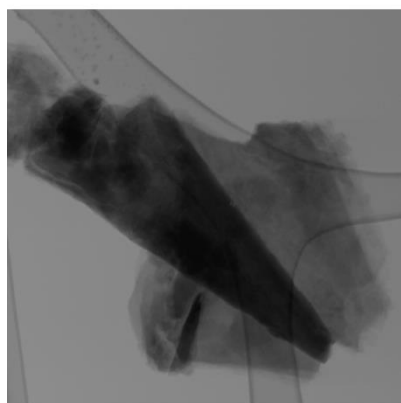

900nm Electron Image 1

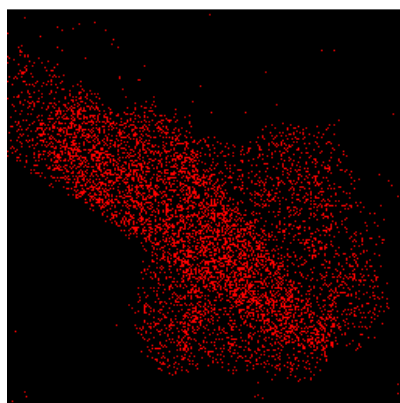

900nm O Ka1

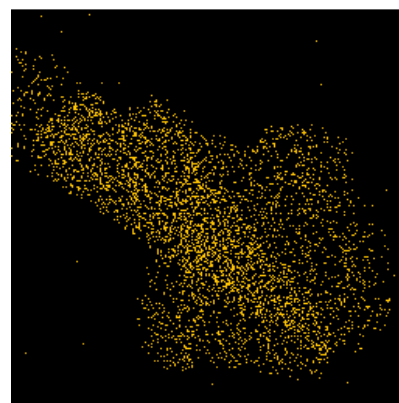

900nm Mg Ka1\_2

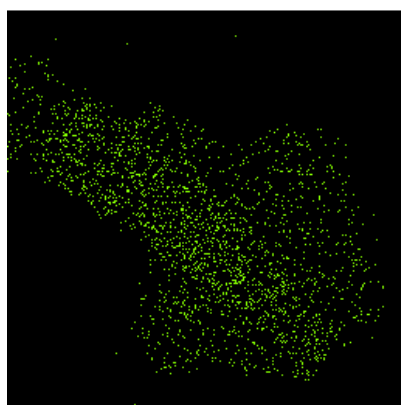

900nm Al Ka1

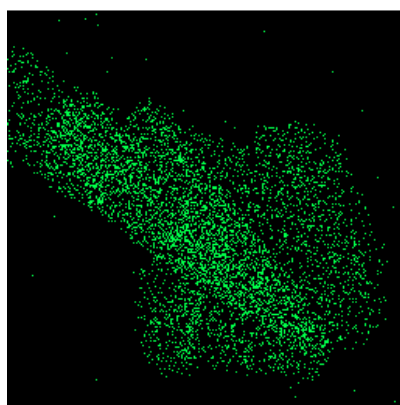

900nm Si Ka1

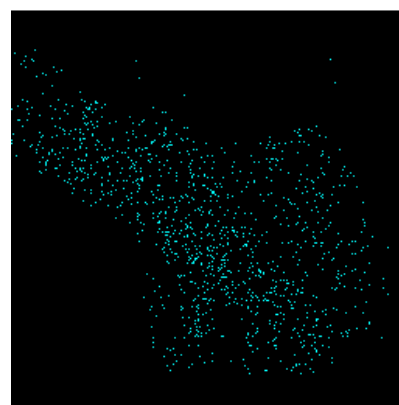

900nm K Ka1

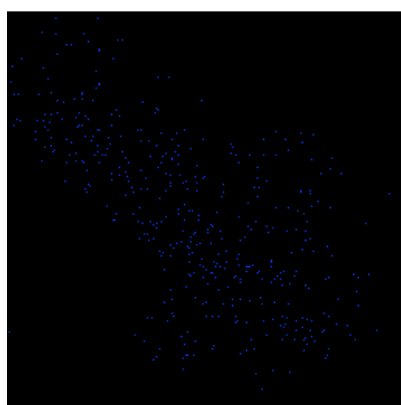

900nm Ca Ka1

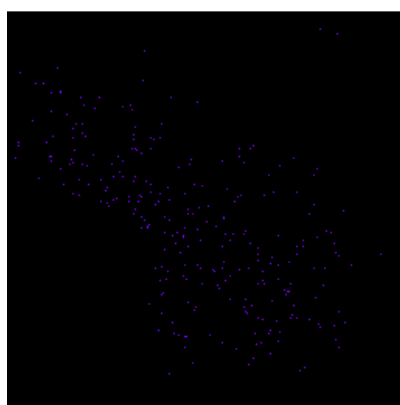

900nm Ti Ka1

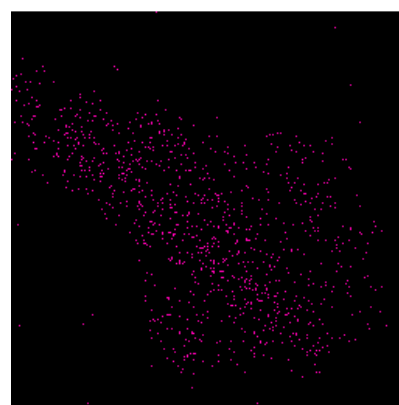

900nm Fe Ka1

Comment:

Project: Project 1

Owner: INCA

Sample: CHG-4E-MW-Ex

Type: Default

| Element | Peak  | Area  | k      | Abs    | Weight% | Weight% | Atomic% |
|---------|-------|-------|--------|--------|---------|---------|---------|
|         | Area  | Sigma | factor | Corrn. |         | Sigma   |         |
| O K     | 15612 | 237   | 1.065  | 1.000  | 45.78   | 0.45    | 60.25   |
| Mg K    | 9804  | 176   | 0.606  | 1.000  | 16.35   | 0.28    | 14.16   |
| Al K    | 4394  | 131   | 0.589  | 1.000  | 7.13    | 0.21    | 5.57    |
| Si K    | 12969 | 204   | 0.569  | 1.000  | 20.33   | 0.30    | 15.24   |
| K K     | 2670  | 95    | 0.552  | 1.000  | 4.06    | 0.14    | 2.18    |
| Ca K    | 682   | 63    | 0.542  | 1.000  | 1.02    | 0.09    | 0.54    |
| Ti K    | 390   | 51    | 0.608  | 1.000  | 0.65    | 0.08    | 0.29    |
| Cr K    | 324   | 43    | 0.637  | 1.000  | 0.57    | 0.08    | 0.23    |
| Fe K    | 2202  | 86    | 0.678  | 1.000  | 4.11    | 0.16    | 1.55    |
| Totals  |       |       |        |        | 100.00  |         |         |

Project: Project 1

Owner: INCA

Sample: CHG-4E-MW-Ex

Type: Default

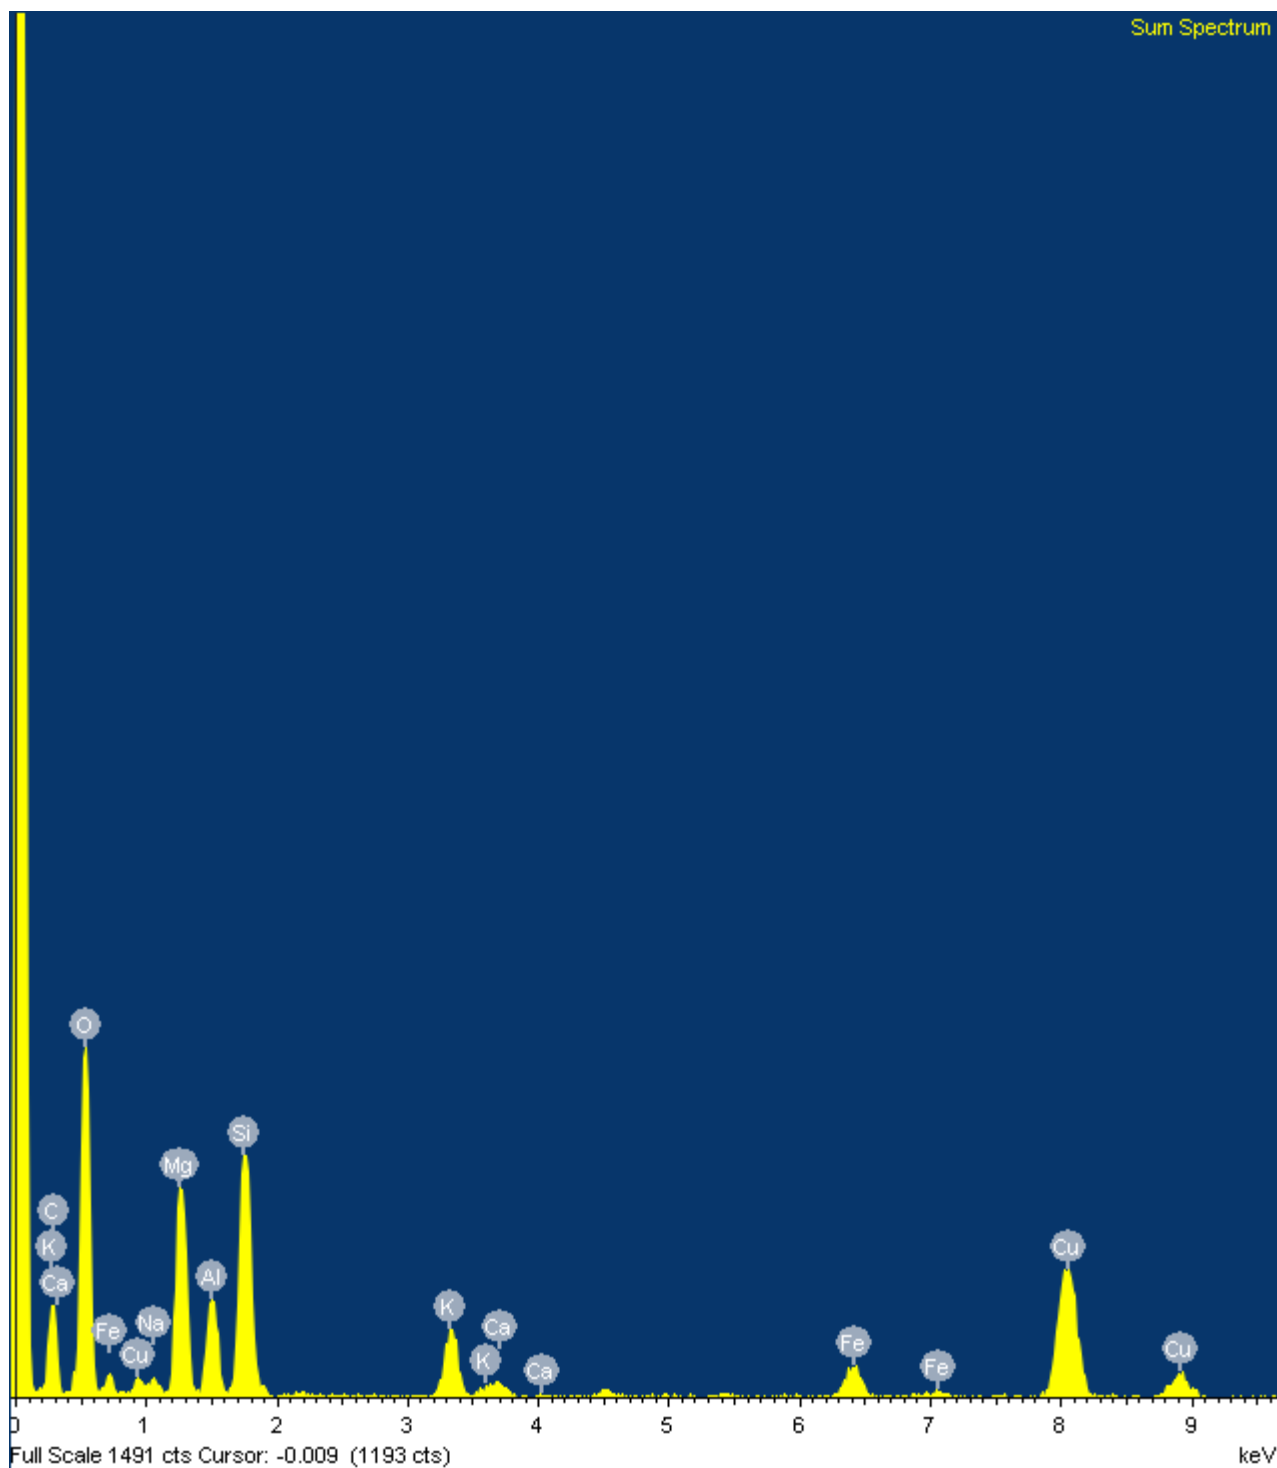

Comment:



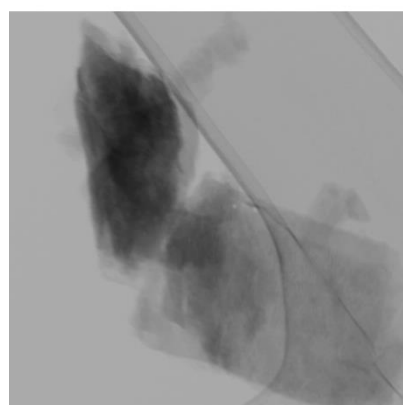

300nm Electron Image 1

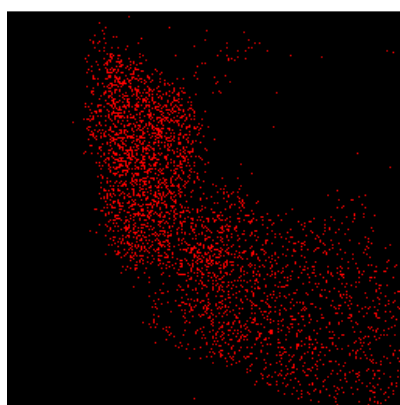

300nm O Ka1

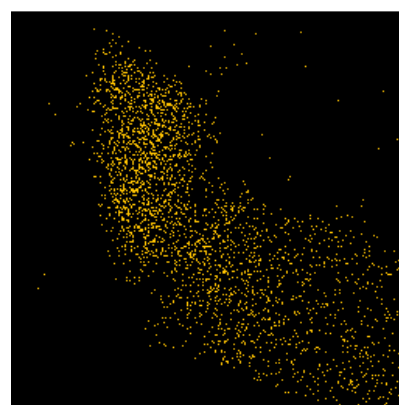

300nm Mg Ka1\_2

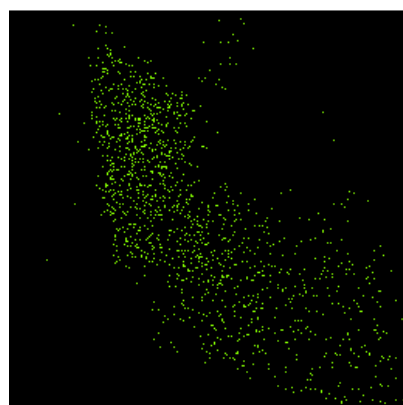

300nm Al Ka1

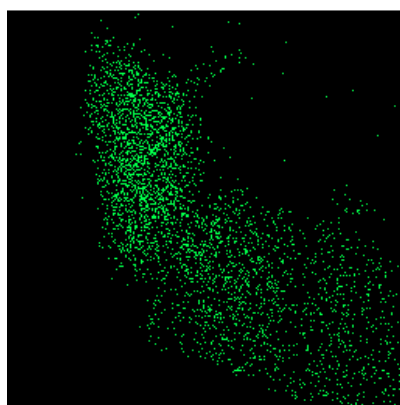

300nm Si Ka1

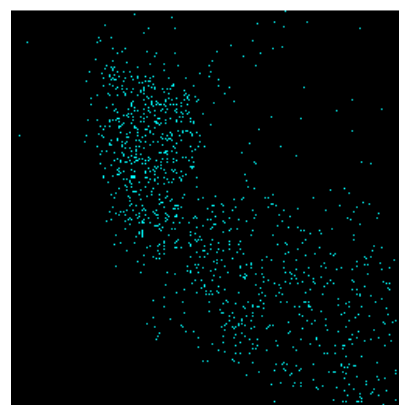

300nm K Ka1

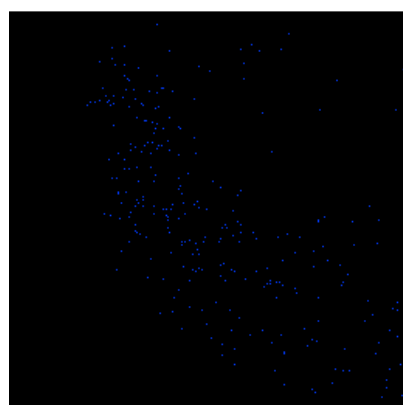

300nm Ca Ka1

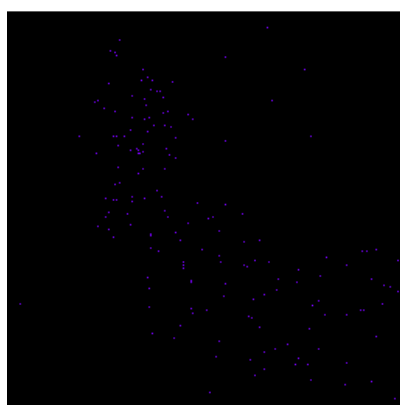

300nm Ti Ka1

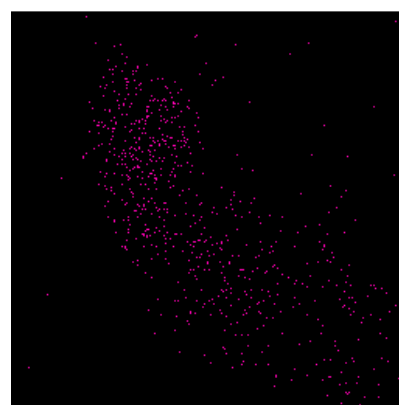

300nm Fe Ka1

Comment:

Project: Project 1

Owner: INCA

Sample: CHG-4E-MW-Ex

Type: Default

| Element | Peak | Area  | k      | Abs    | Weight% | Weight% | Atomic% |
|---------|------|-------|--------|--------|---------|---------|---------|
|         | Area | Sigma | factor | Corrn. |         | Sigma   |         |
| O K     | 5691 | 139   | 1.065  | 1.000  | 42.89   | 0.71    | 57.73   |
| Mg K    | 3886 | 111   | 0.606  | 1.000  | 16.66   | 0.45    | 14.75   |
| Al K    | 1760 | 84    | 0.589  | 1.000  | 7.34    | 0.34    | 5.86    |
| Si K    | 4915 | 128   | 0.569  | 1.000  | 19.79   | 0.48    | 15.18   |
| K K     | 1747 | 77    | 0.552  | 1.000  | 6.82    | 0.30    | 3.76    |
| Ca K    | 294  | 43    | 0.542  | 1.000  | 1.13    | 0.16    | 0.61    |
| Ti K    | 177  | 32    | 0.608  | 1.000  | 0.76    | 0.14    | 0.34    |
| Fe K    | 960  | 58    | 0.678  | 1.000  | 4.60    | 0.27    | 1.78    |
| Totals  |      |       |        |        | 100.00  |         |         |
