# Supplementary material for: Heterogeneous Distribution of Interlayer Cations and Iron as a Plausible Explanation of the Non-Exfoliation of Commercial Vermiculites Post Alcohol Treatment and Microwave Irradiation
Source: MDPI journal article supplement (doi:10.3390/min11080835), 2021-08-01
Supplement: s1 [file s1]

Project: Project 1

Owner: INCA

Sample: L4M-MW-No

Type: Default

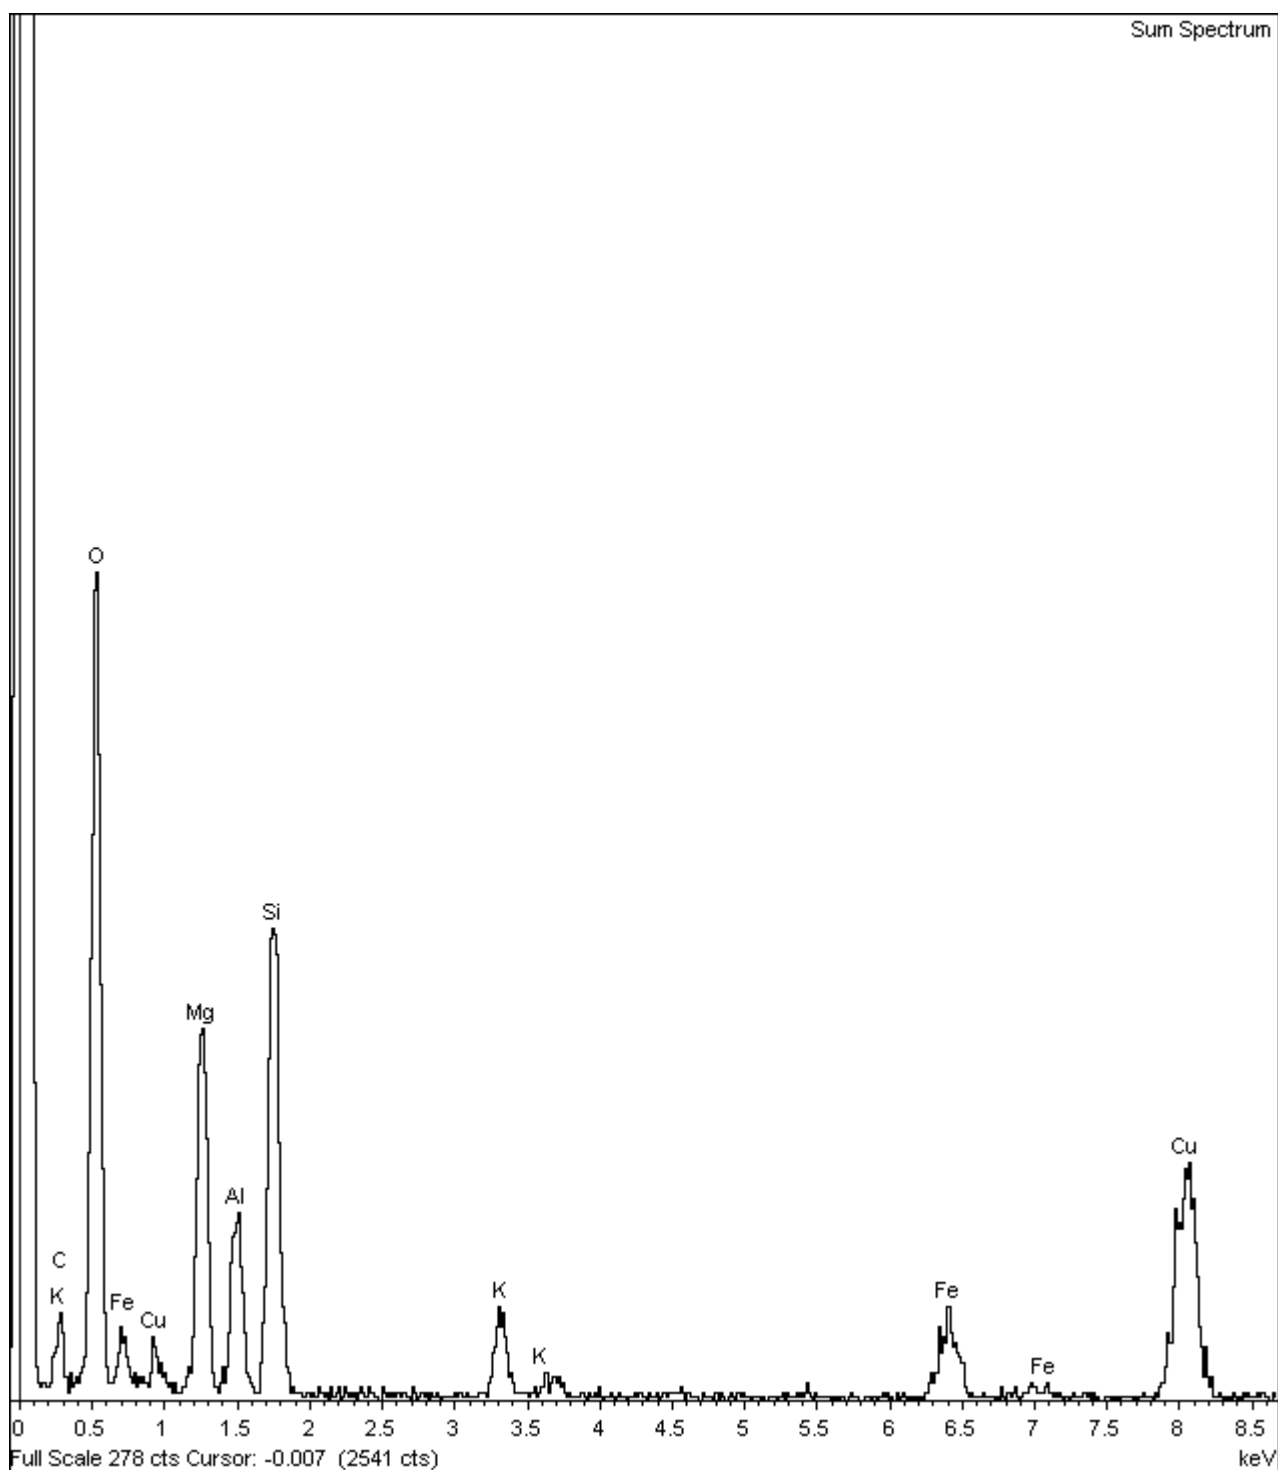

Comment:

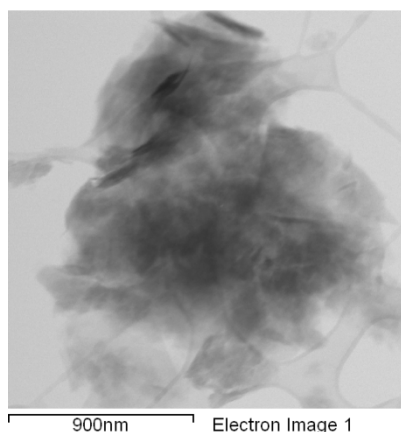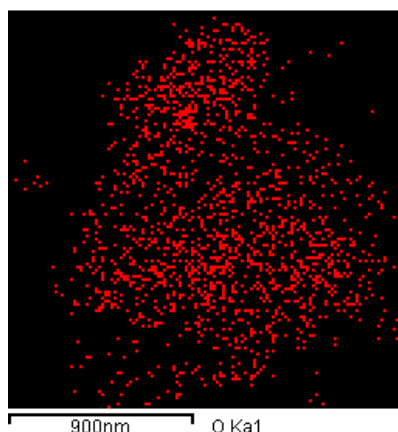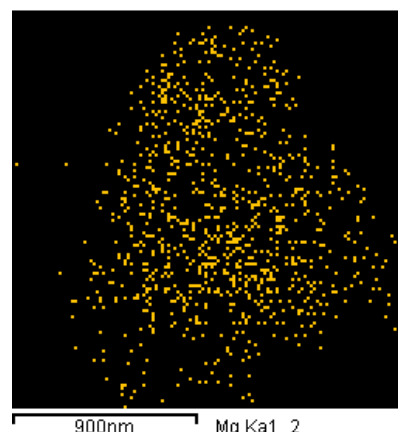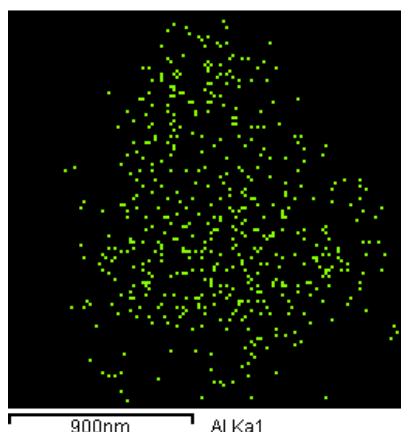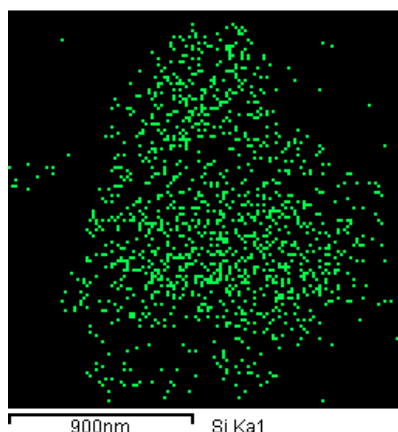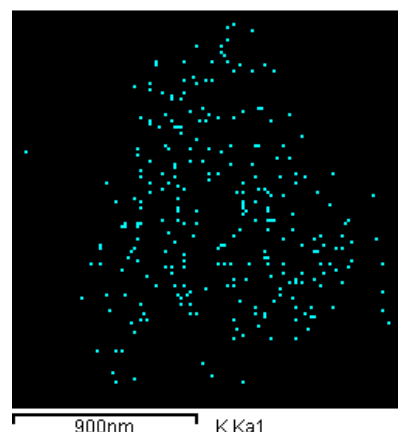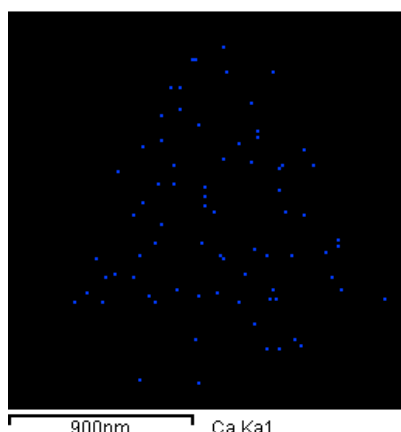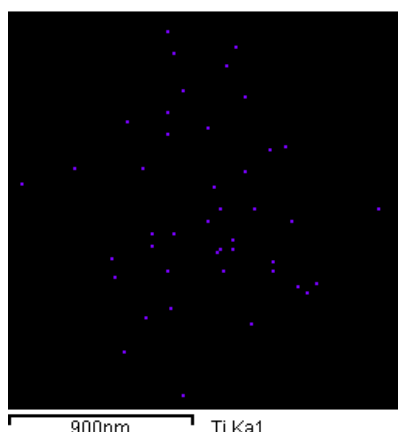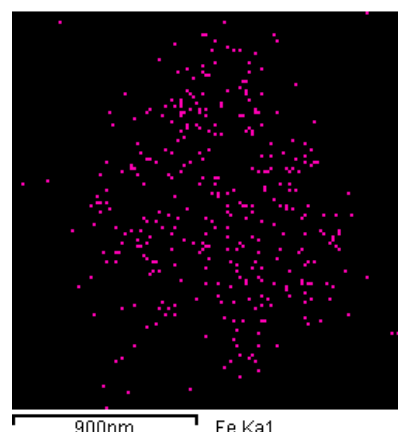

Comment:

Project: Project 1

Owner: INCA

Sample: L4M-MW-No

Type: Default

| Element | Peak | Area  | k      | Abs    | Weight% | Weight% | Atomic% |
|---------|------|-------|--------|--------|---------|---------|---------|
|         | Area | Sigma | factor | Cornn. |         | Sigma   |         |
| O K     | 2382 | 95    | 1.065  | 1.000  | 48.23   | 1.20    | 63.02   |
| Mg K    | 1214 | 62    | 0.606  | 1.000  | 13.97   | 0.69    | 12.02   |
| Al K    | 578  | 49    | 0.589  | 1.000  | 6.47    | 0.54    | 5.02    |
| Si K    | 1847 | 74    | 0.569  | 1.000  | 19.98   | 0.78    | 14.88   |
| K K     | 398  | 35    | 0.552  | 1.000  | 4.17    | 0.37    | 2.23    |
| Ca K    | 85   | 23    | 0.542  | 1.000  | 0.88    | 0.23    | 0.46    |
| Ti K    | 29   | 18    | 0.608  | 1.000  | 0.34    | 0.20    | 0.15    |
| Fe K    | 462  | 39    | 0.678  | 1.000  | 5.95    | 0.49    | 2.23    |
| Totals  |      |       |        |        | 100.00  |         |         |

Project: Project 1

Owner: INCA

Sample: L4M-MW-No

Type: Default

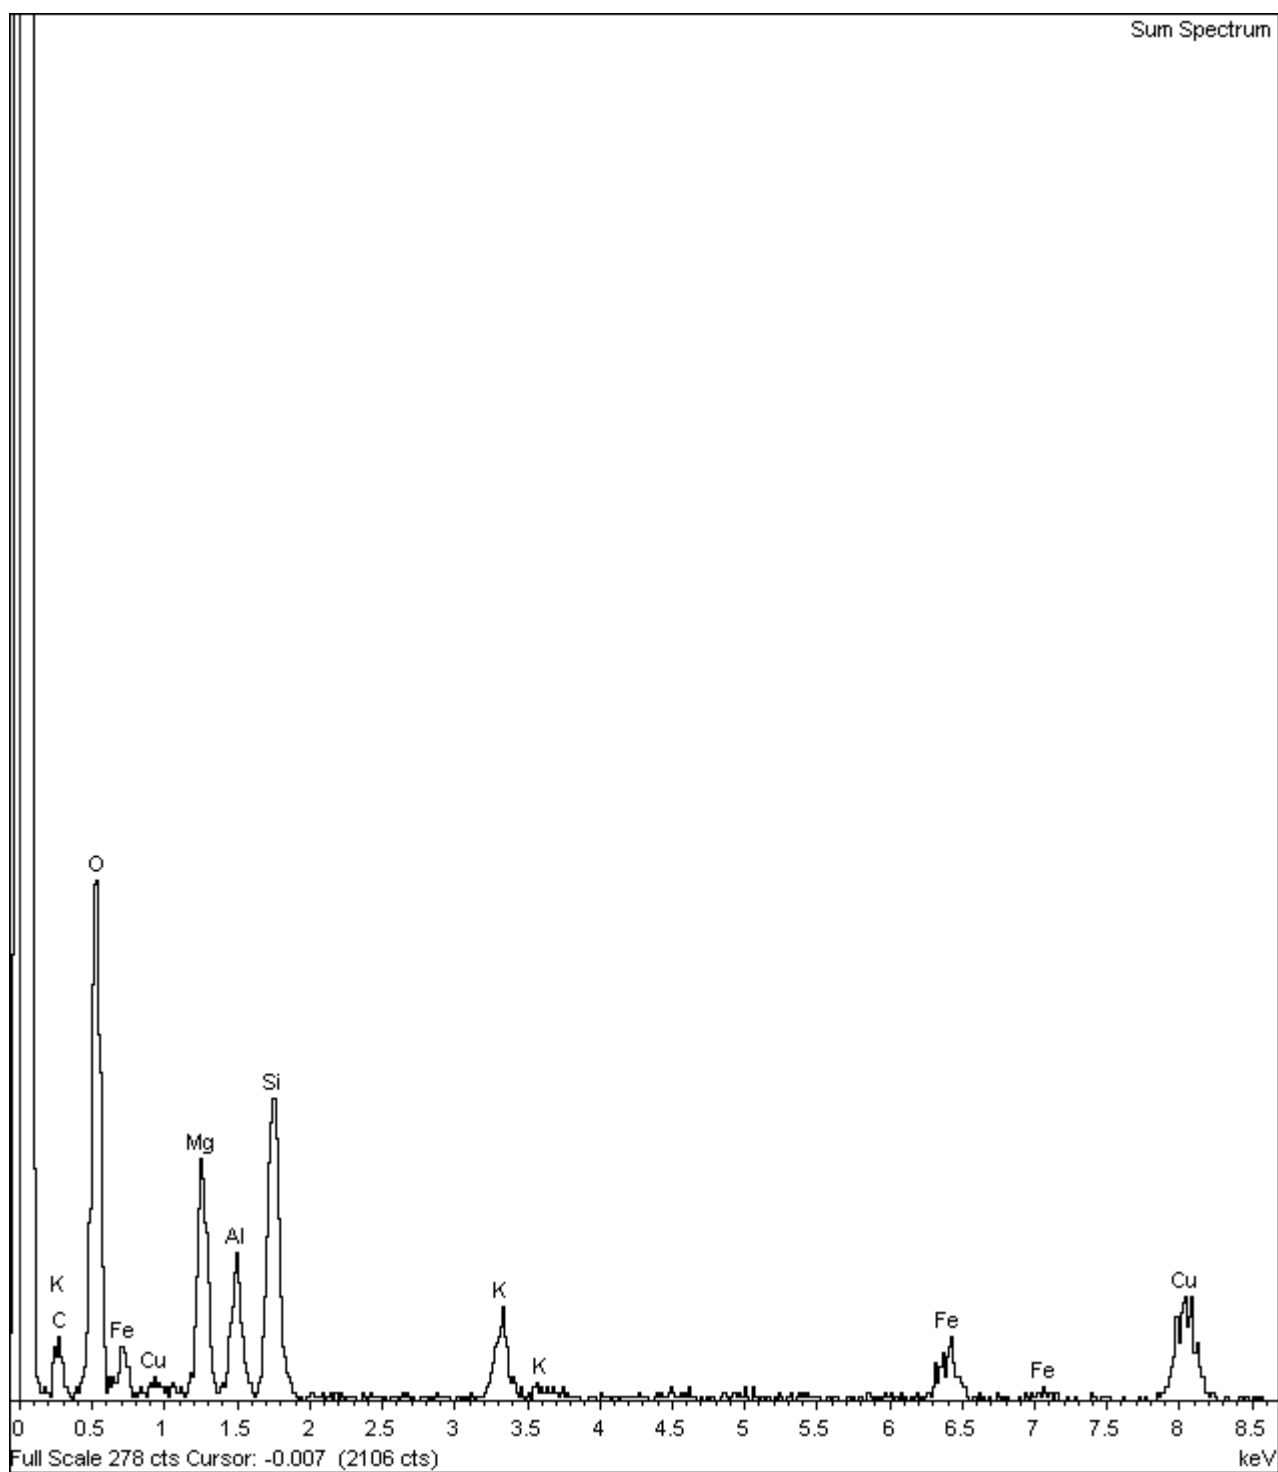

Comment:

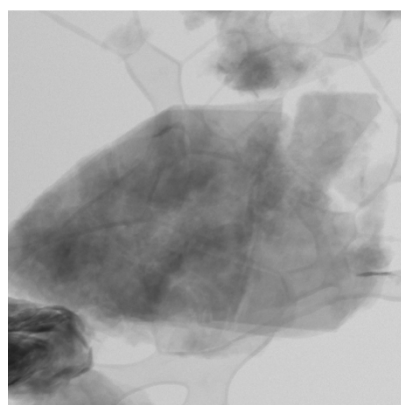

Electron Image 1

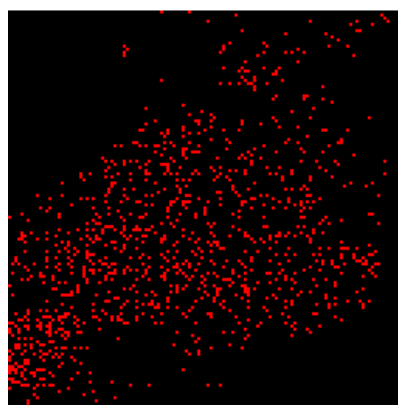

O Ka1

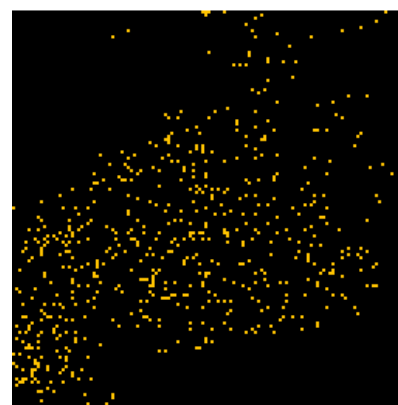

Mg Ka1\_2

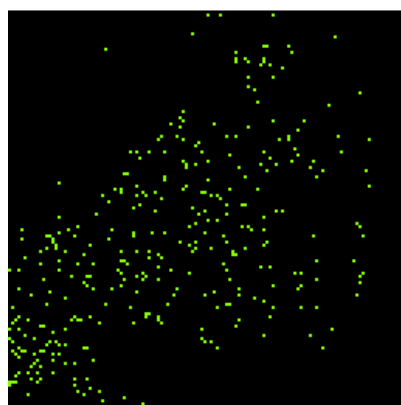

Al Ka1

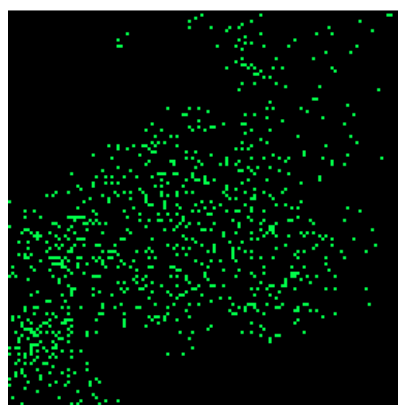

Si Ka1

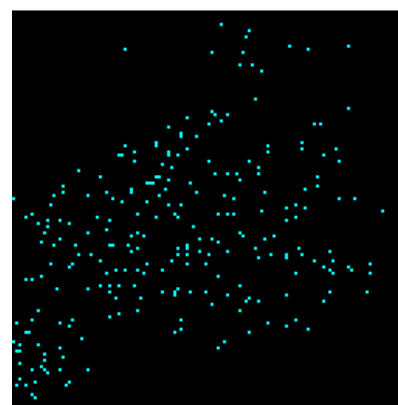

K Ka1

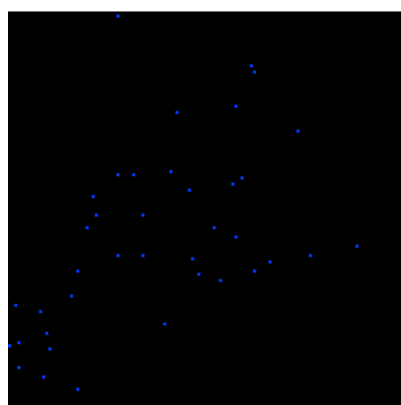

Ca Ka1

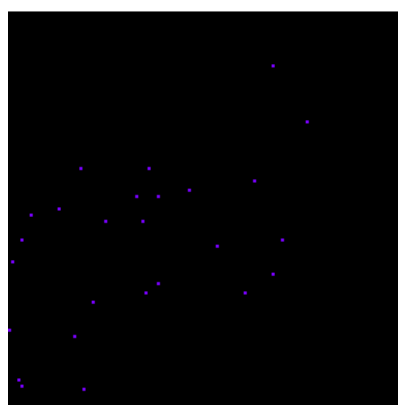

Ti Ka1

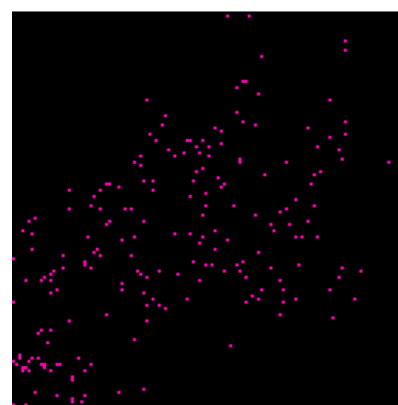

Fe Ka1

Comment:

Project: Project 1

Owner: INCA

Sample: L4M-MW-No

Type: Default

| Element | Peak | Area  | k      | Abs   | Weight% | Weight% | Atomic% |
|---------|------|-------|--------|-------|---------|---------|---------|
|         | Area | Sigma | factor | Corn. |         | Sigma   |         |
| O K     | 1536 | 76    | 1.065  | 1.000 | 48.86   | 1.50    | 63.77   |
| Mg K    | 744  | 49    | 0.606  | 1.000 | 13.46   | 0.86    | 11.56   |
| Al K    | 380  | 40    | 0.589  | 1.000 | 6.69    | 0.69    | 5.17    |
| Si K    | 1095 | 60    | 0.569  | 1.000 | 18.62   | 0.98    | 13.84   |
| K K     | 350  | 34    | 0.552  | 1.000 | 5.77    | 0.55    | 3.08    |
| Ca K    | 31   | 16    | 0.542  | 1.000 | 0.50    | 0.26    | 0.26    |
| Ti K    | 28   | 13    | 0.608  | 1.000 | 0.50    | 0.24    | 0.22    |
| Fe K    | 277  | 30    | 0.678  | 1.000 | 5.61    | 0.60    | 2.10    |
| Totals  |      |       |        |       | 100.00  |         |         |

Project: Project 1

Owner: INCA

Sample: L4M-MW-No

Type: Default

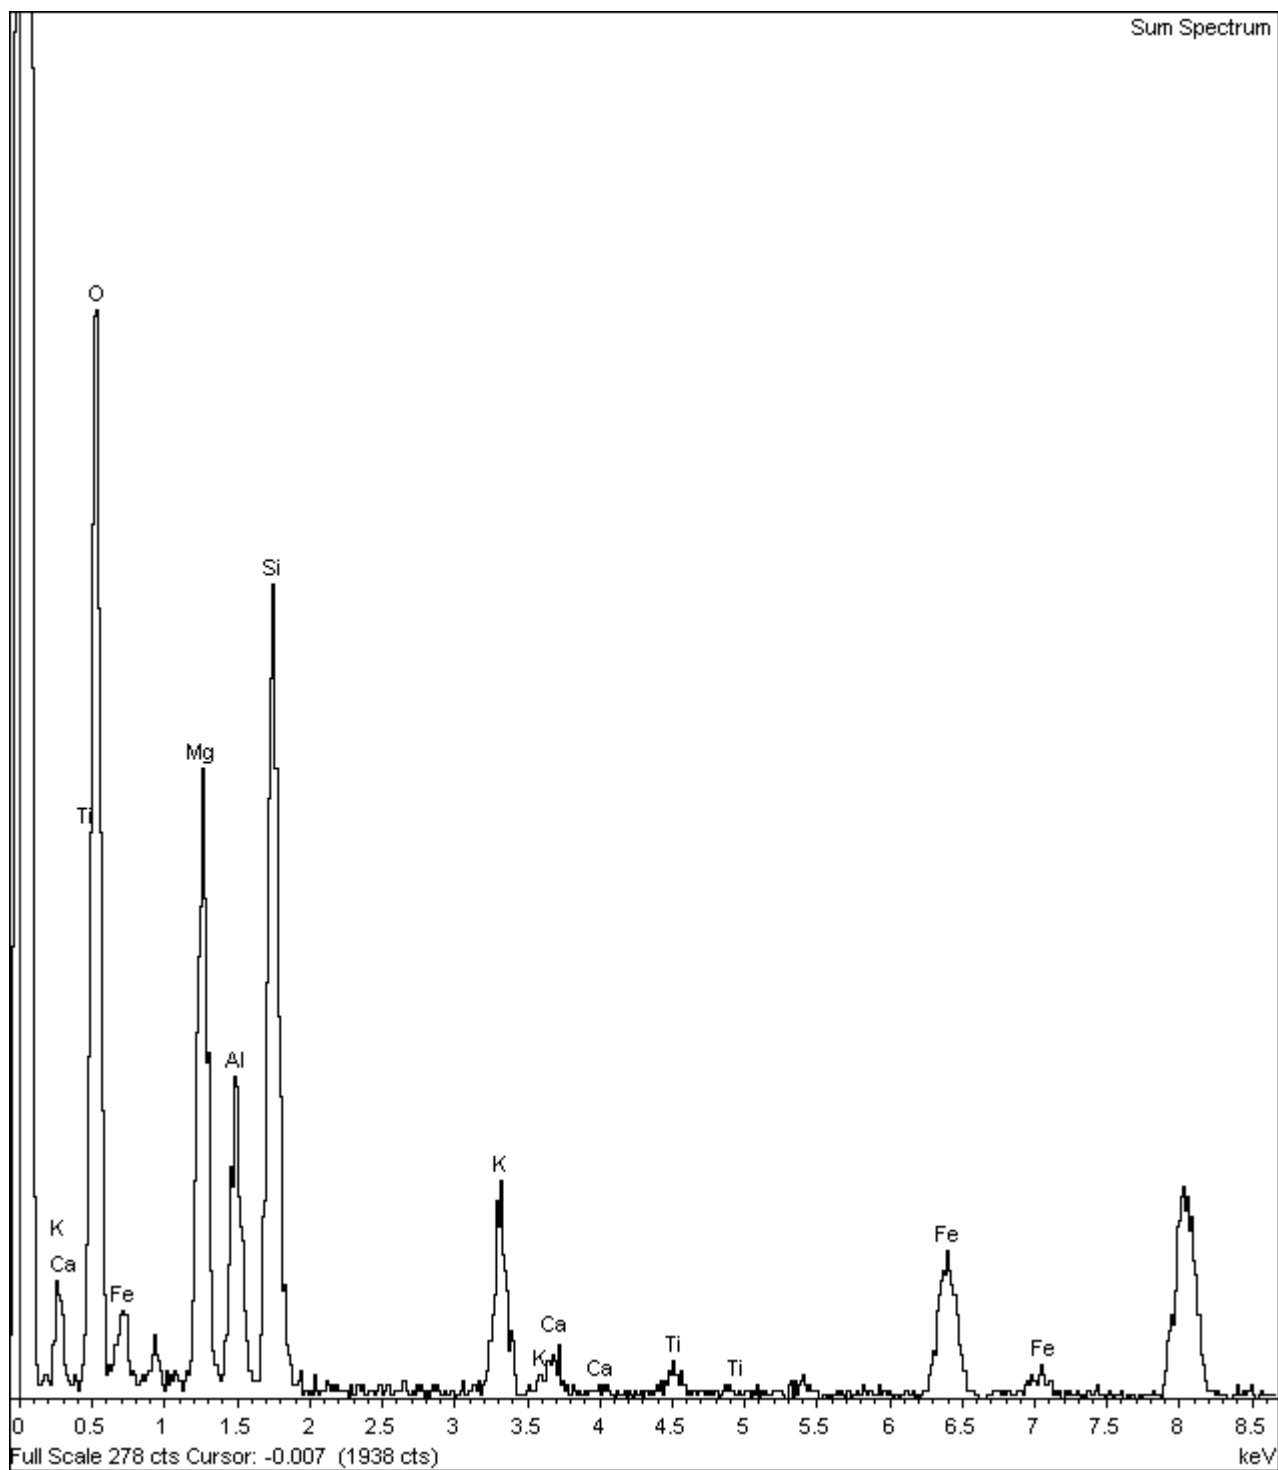

Comment:

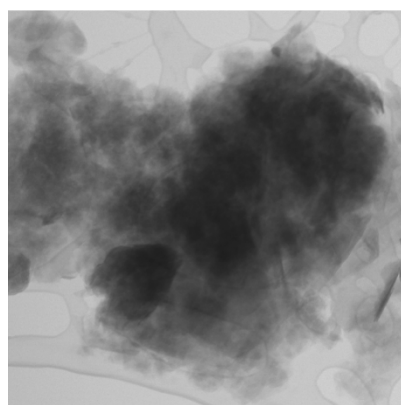

Electron Image 1

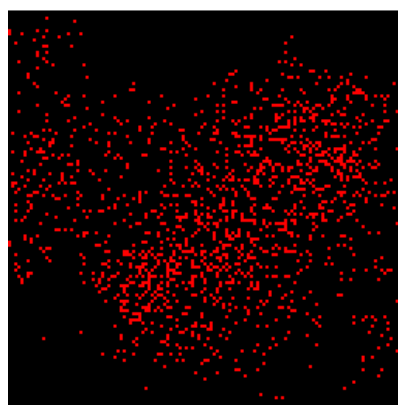

O Ka1

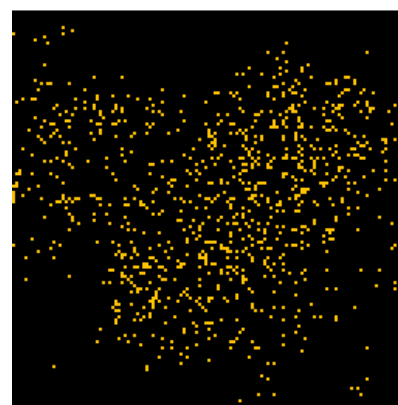

Mg Ka1\_2

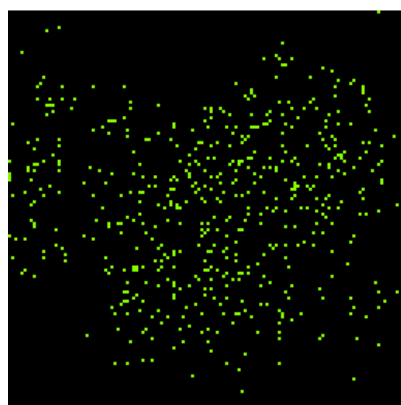

Al Ka1

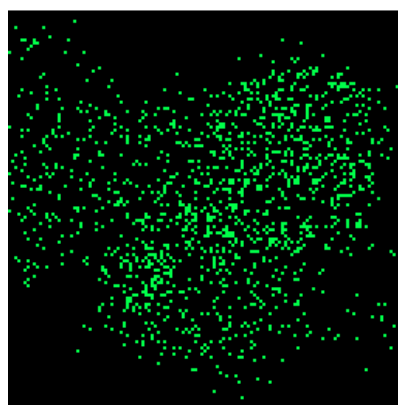

Si Ka1

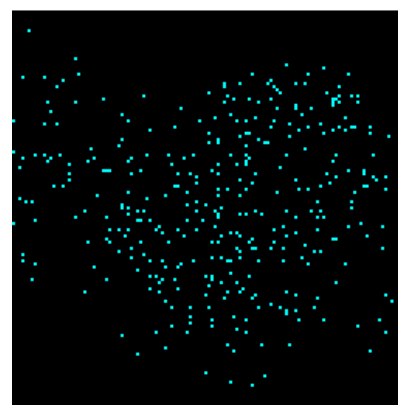

K Ka1

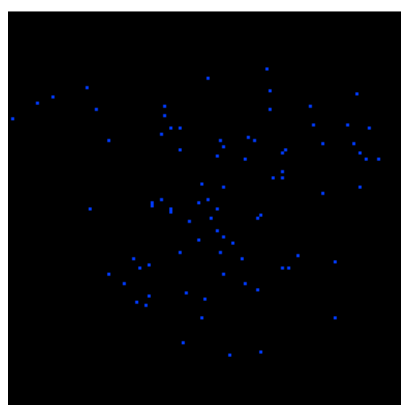

Ca Ka1

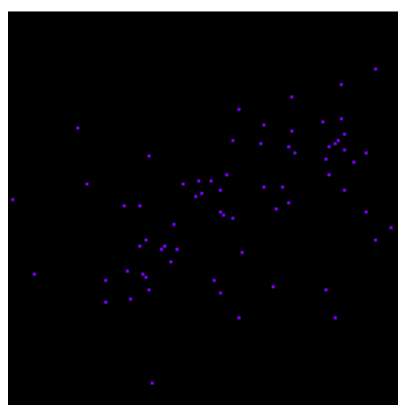

Ti Ka1

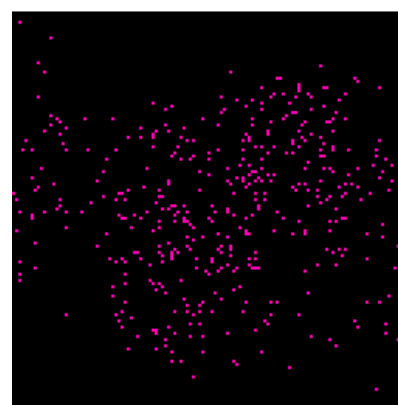

Fe Ka1

Comment:



| Element | Peak | Area  | k      | Abs    | Weight% | Weight% | Atomic% |
|---------|------|-------|--------|--------|---------|---------|---------|
|         | Area | Sigma | factor | Cornn. |         | Sigma   |         |
| O K     | 3169 | 103   | 1.065  | 1.000  | 43.51   | 0.96    | 59.00   |
| Mg K    | 1848 | 77    | 0.606  | 1.000  | 14.43   | 0.57    | 12.87   |
| Al K    | 906  | 61    | 0.589  | 1.000  | 6.88    | 0.45    | 5.53    |
| Si K    | 2772 | 94    | 0.569  | 1.000  | 20.34   | 0.65    | 15.71   |
| K K     | 764  | 50    | 0.552  | 1.000  | 5.43    | 0.35    | 3.01    |
| Ca K    | 155  | 28    | 0.542  | 1.000  | 1.08    | 0.19    | 0.59    |
| Ti K    | 97   | 23    | 0.608  | 1.000  | 0.76    | 0.18    | 0.35    |
| Fe K    | 865  | 50    | 0.678  | 1.000  | 7.56    | 0.43    | 2.94    |
| Totals  |      |       |        |        | 100.00  |         |         |

Project: Project 1

Owner: INCA

Sample: L4M-MW-No

Type: Default

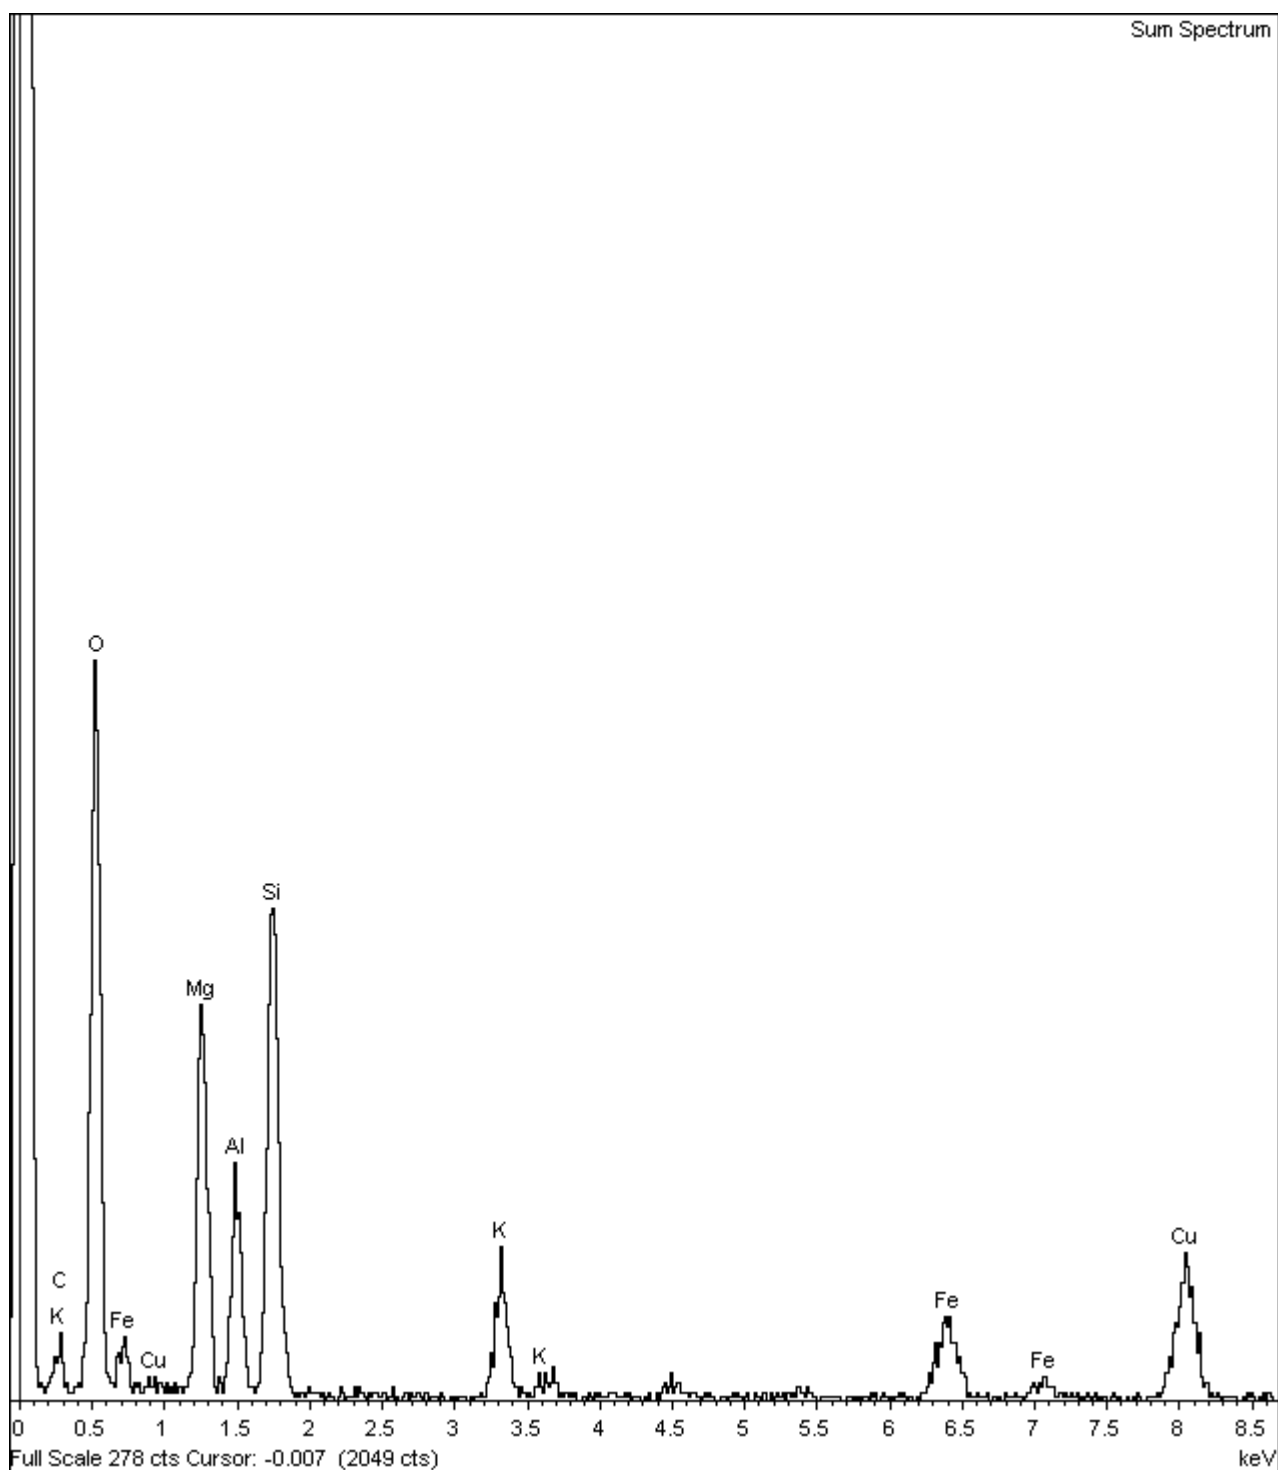

Comment:

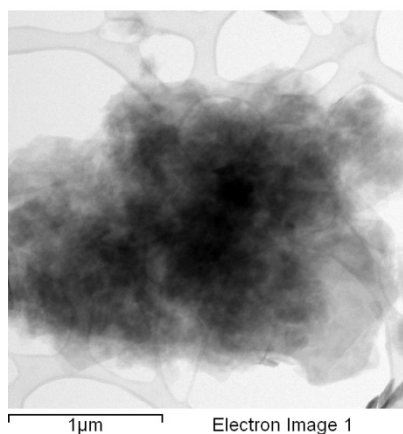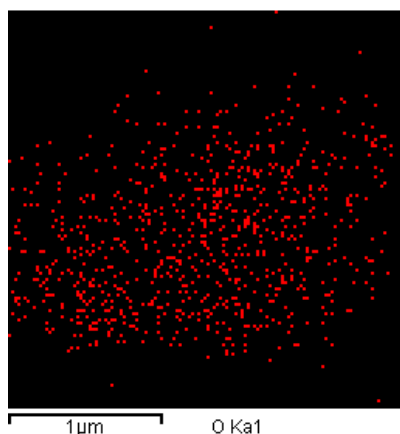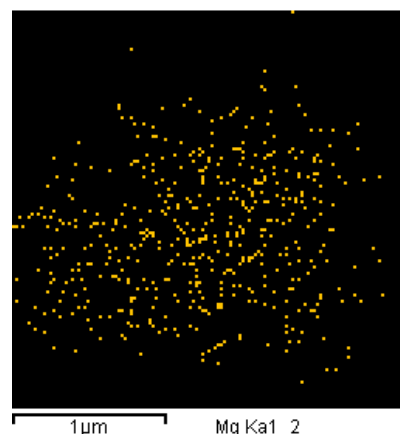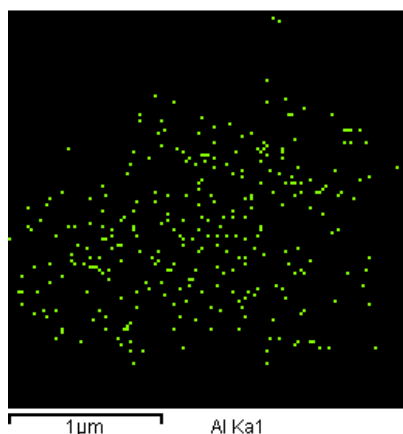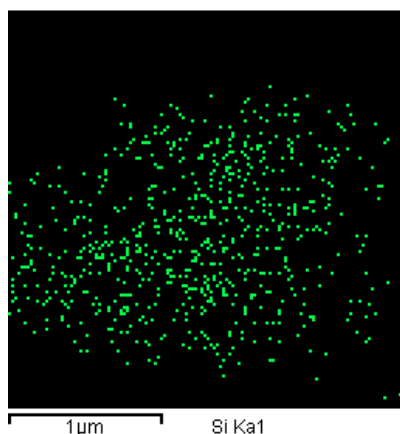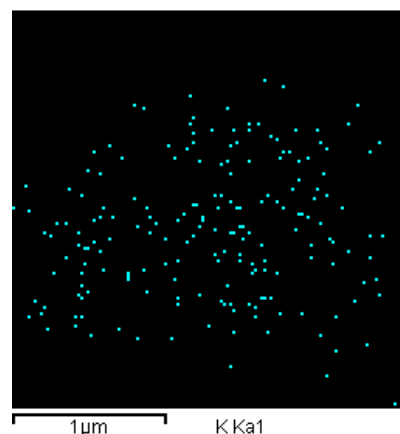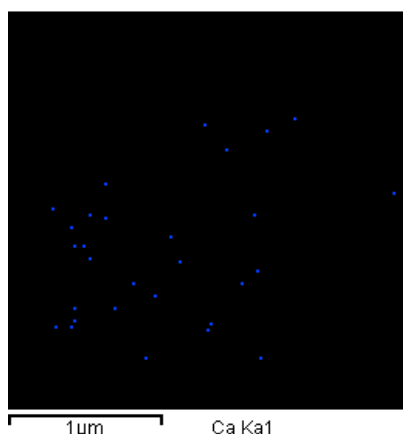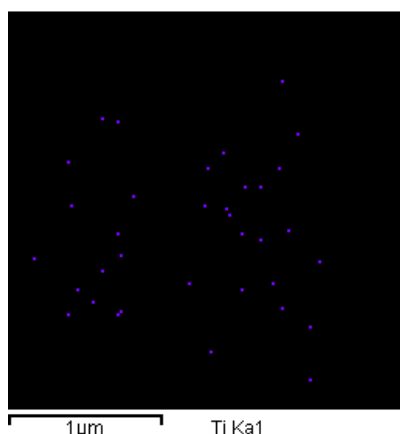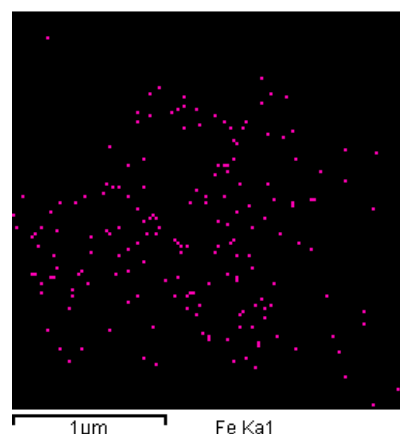

Comment:

Project: Project 1

Owner: INCA

Sample: L4M-MW-No

Type: Default

| Element | Peak | Area  | k      | Abs    | Weight% | Weight% | Atomic% |
|---------|------|-------|--------|--------|---------|---------|---------|
|         | Area | Sigma | factor | Cornn. |         | Sigma   |         |
| O K     | 2161 | 91    | 1.065  | 1.000  | 45.34   | 1.24    | 60.38   |
| Mg K    | 1210 | 62    | 0.606  | 1.000  | 14.43   | 0.72    | 12.65   |
| Al K    | 649  | 50    | 0.589  | 1.000  | 7.53    | 0.56    | 5.95    |
| Si K    | 1762 | 74    | 0.569  | 1.000  | 19.76   | 0.80    | 14.99   |
| K K     | 535  | 41    | 0.552  | 1.000  | 5.82    | 0.45    | 3.17    |
| Ca K    | 69   | 20    | 0.542  | 1.000  | 0.74    | 0.21    | 0.39    |
| Ti K    | 58   | 20    | 0.608  | 1.000  | 0.69    | 0.24    | 0.31    |
| Fe K    | 426  | 40    | 0.678  | 1.000  | 5.69    | 0.52    | 2.17    |
| Totals  |      |       |        |        | 100.00  |         |         |

Project: Project 1

Owner: INCA

Sample: L4M-MW-No

Type: Default

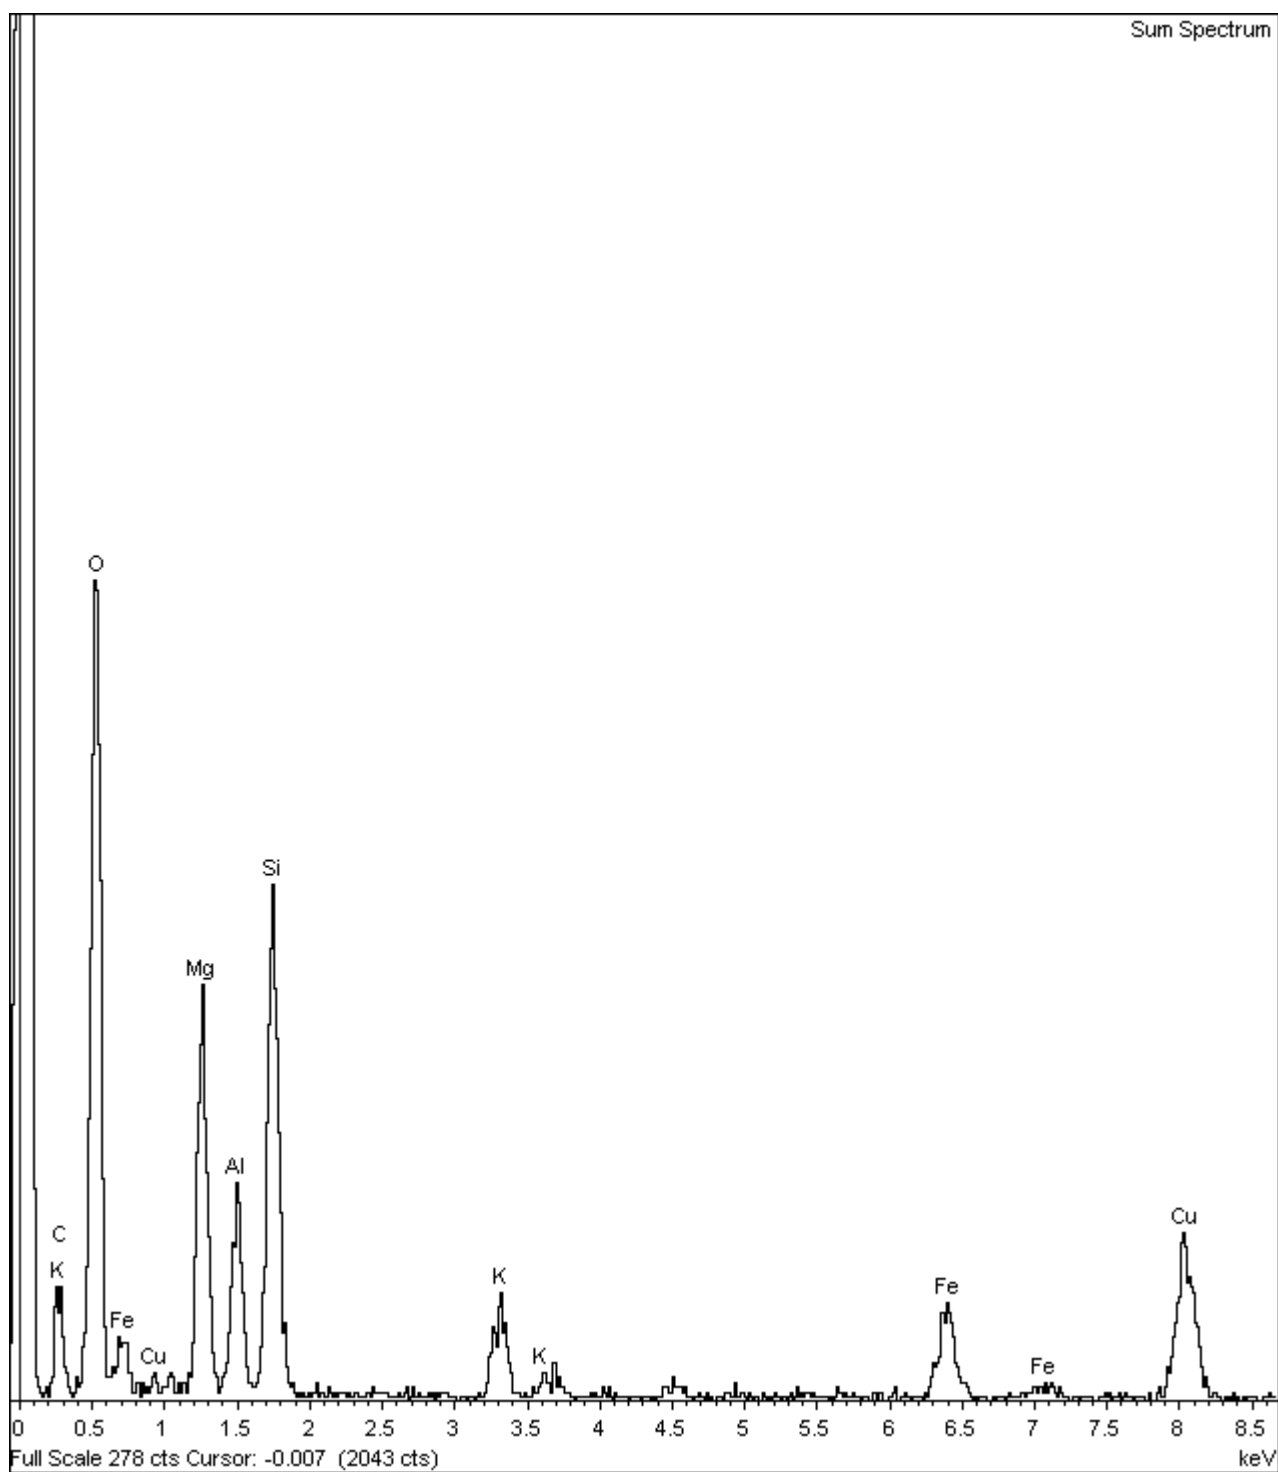

Comment:

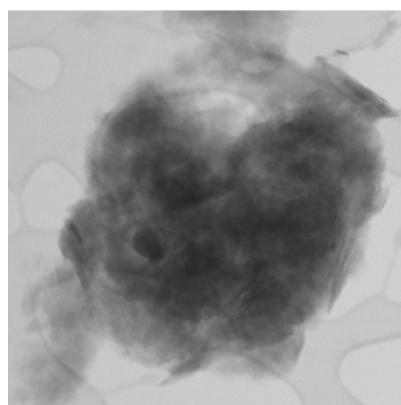

900nm Electron Image 1

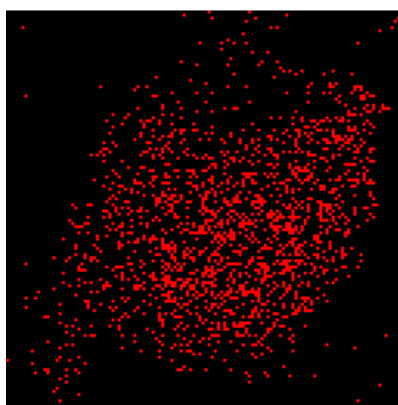

900nm O Ka1

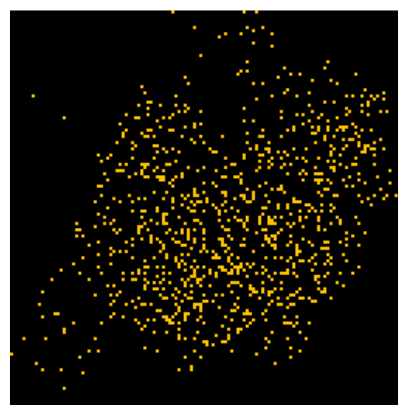

900nm Mg Ka1\_2

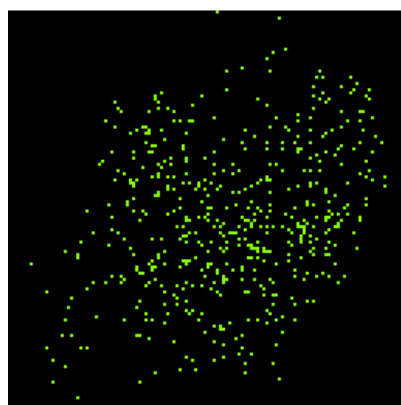

900nm Al Ka1

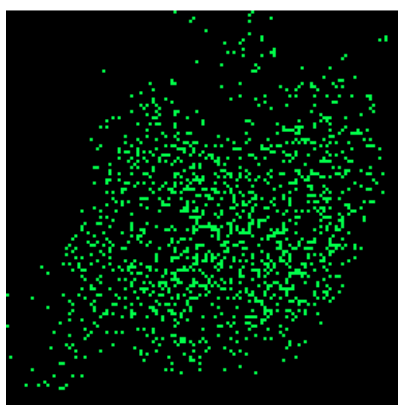

900nm Si Ka1

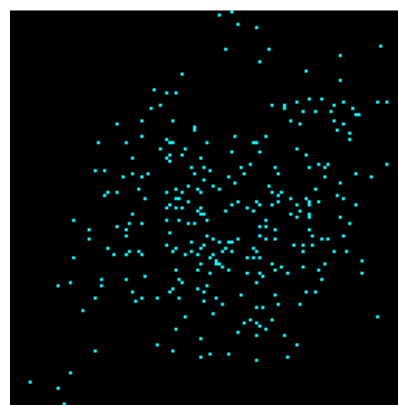

900nm K Ka1

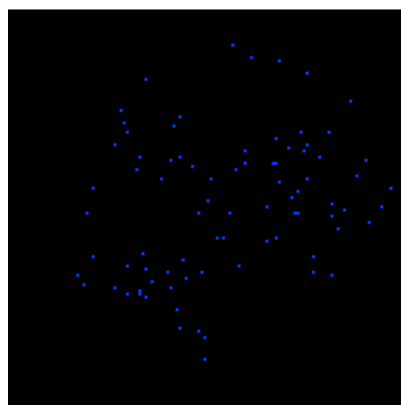

900nm Ca Ka1

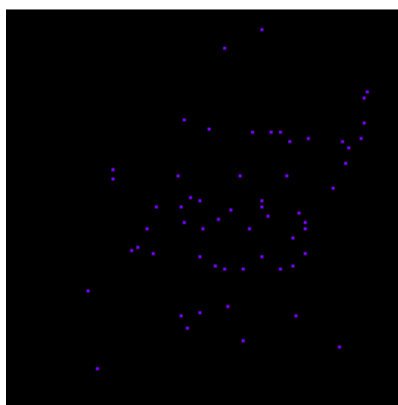

900nm Ti Ka1

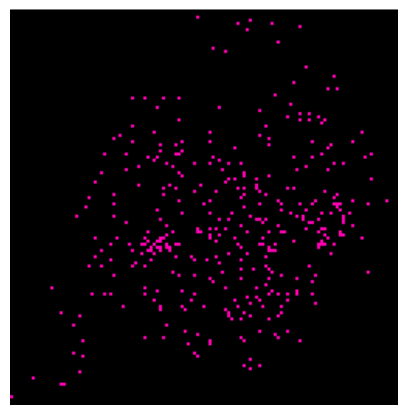

900nm Fe Ka1

Comment:

Project: Project 1

Owner: INCA

Sample: L4M-MW-No

Type: Default

| Element | Peak | Area  | k      | Abs    | Weight% | Weight% | Atomic% |
|---------|------|-------|--------|--------|---------|---------|---------|
|         | Area | Sigma | factor | Cornn. |         | Sigma   |         |
| O K     | 2349 | 96    | 1.065  | 1.000  | 47.71   | 1.22    | 62.78   |
| Mg K    | 1192 | 62    | 0.606  | 1.000  | 13.76   | 0.69    | 11.92   |
| Al K    | 625  | 50    | 0.589  | 1.000  | 7.03    | 0.54    | 5.48    |
| Si K    | 1755 | 75    | 0.569  | 1.000  | 19.04   | 0.79    | 14.28   |
| K K     | 391  | 37    | 0.552  | 1.000  | 4.11    | 0.39    | 2.22    |
| Ca K    | 85   | 23    | 0.542  | 1.000  | 0.88    | 0.23    | 0.46    |
| Ti K    | 65   | 17    | 0.608  | 1.000  | 0.75    | 0.20    | 0.33    |
| Fe K    | 519  | 39    | 0.678  | 1.000  | 6.70    | 0.50    | 2.53    |
| Totals  |      |       |        |        | 100.00  |         |         |
