# Supplementary material for: Heterogeneous Distribution of Interlayer Cations and Iron as a Plausible Explanation of the Non-Exfoliation of Commercial Vermiculites Post Alcohol Treatment and Microwave Irradiation
Source: MDPI journal article supplement (doi:10.3390/min11080835), 2021-08-01
Supplement: s1 [file s1]

Project: Project 1

Owner: INCA

Sample: L4B-MW-No

Type: Default

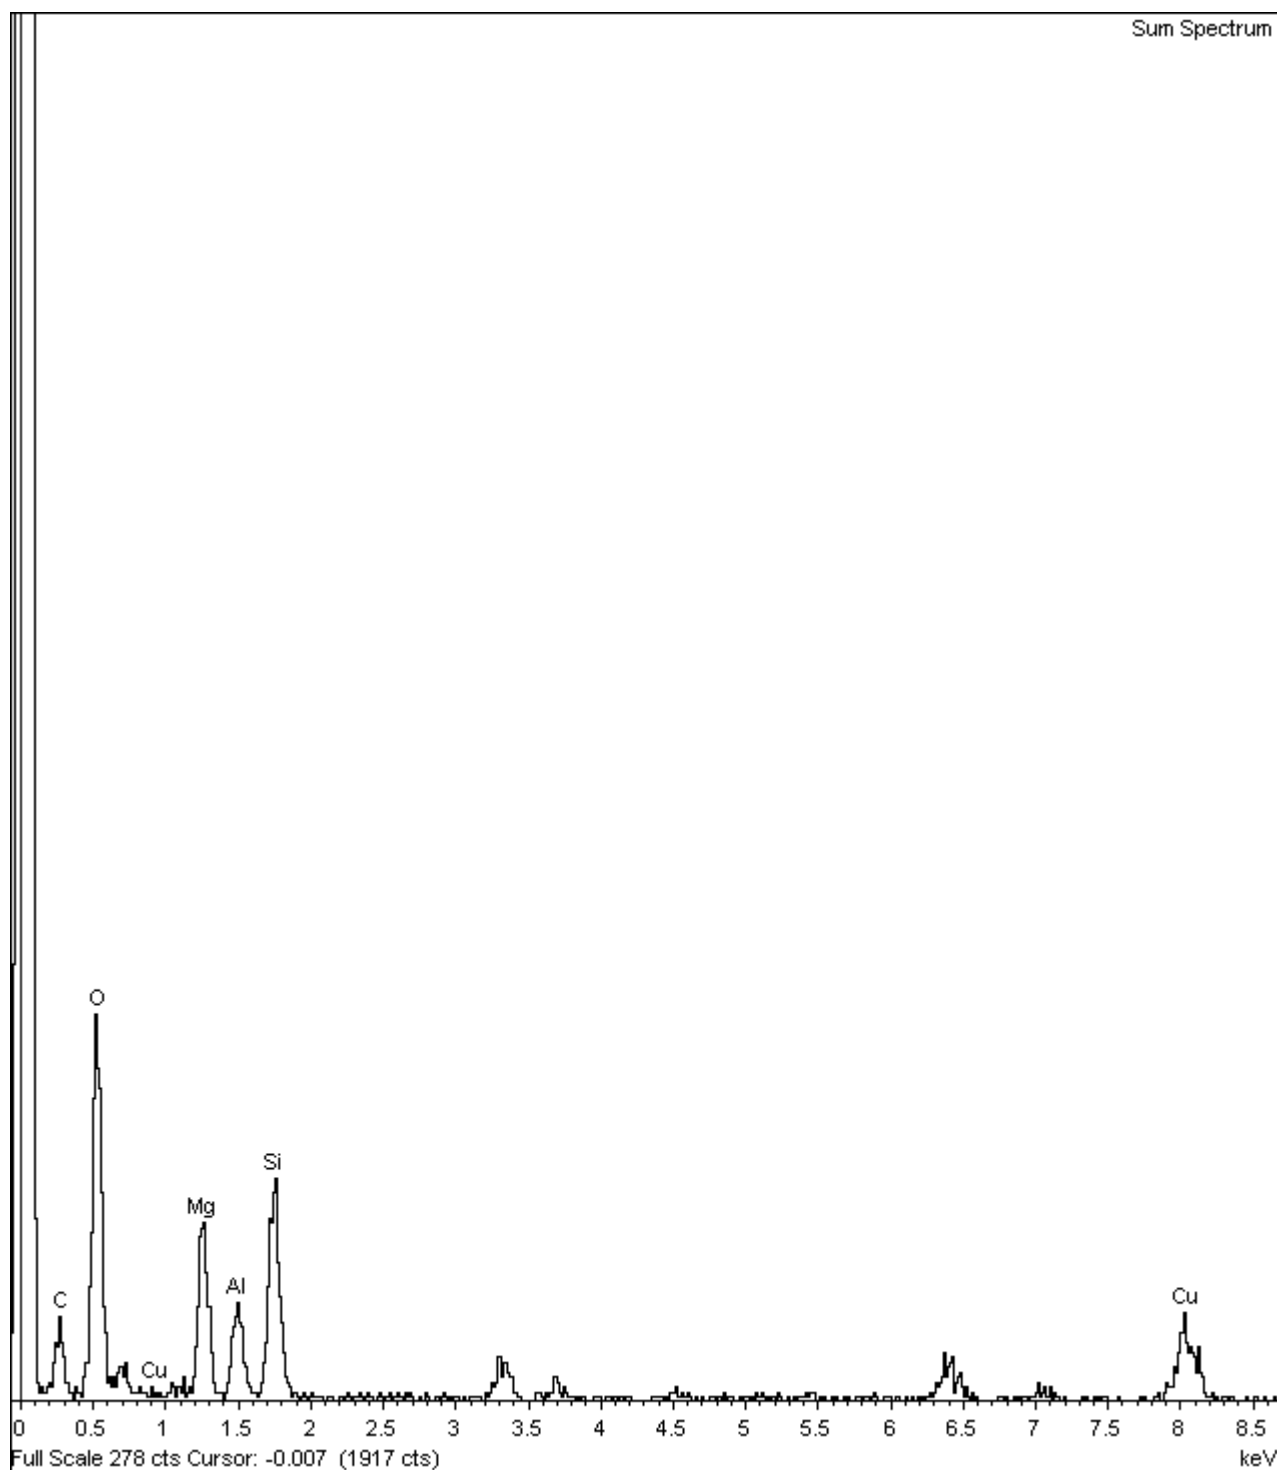

Comment:

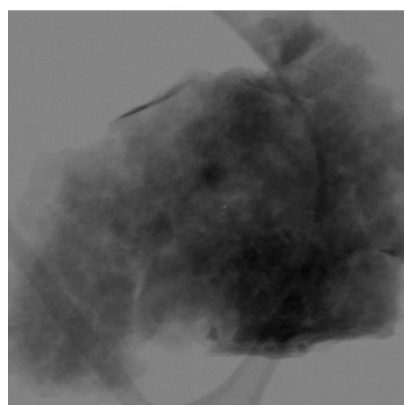

Electron Image 1

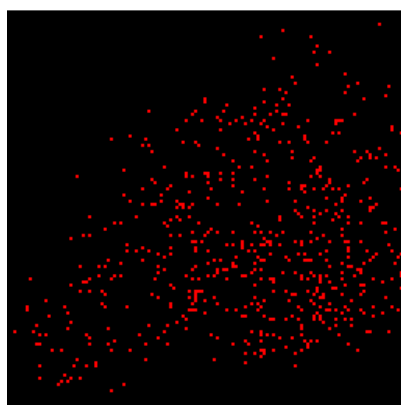

O Ka1

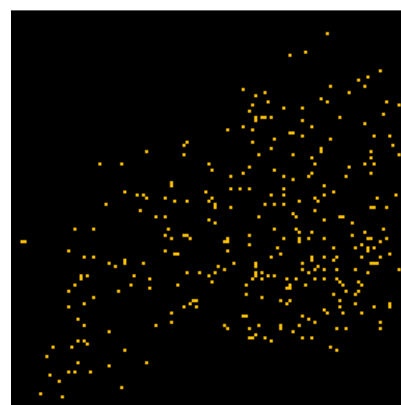

Mg Ka1\_2

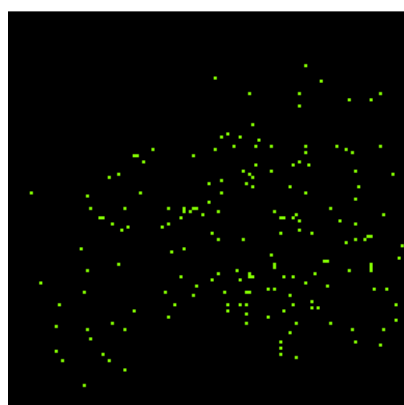

Al Ka1

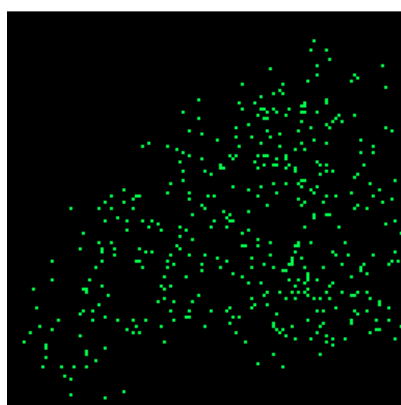

Si Ka1

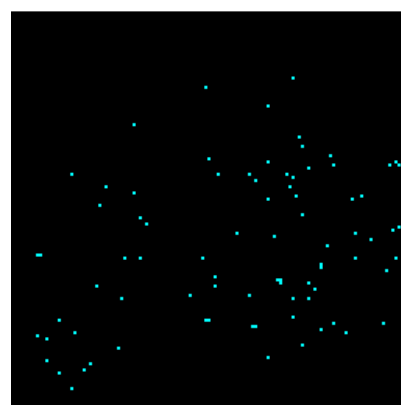

K Ka1

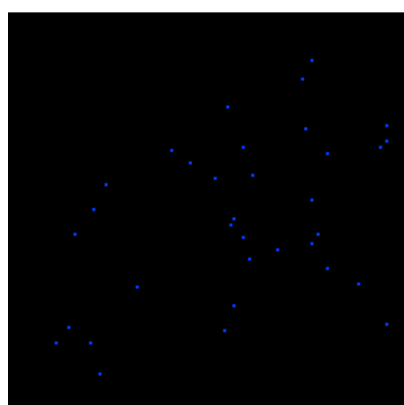

Ca Ka1

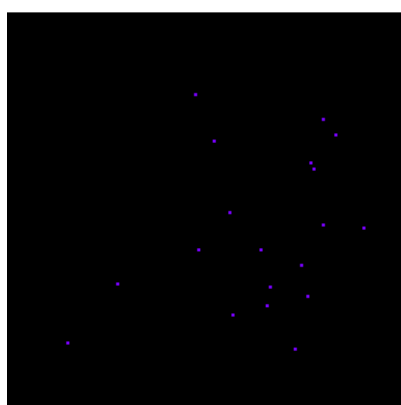

Ti Ka1

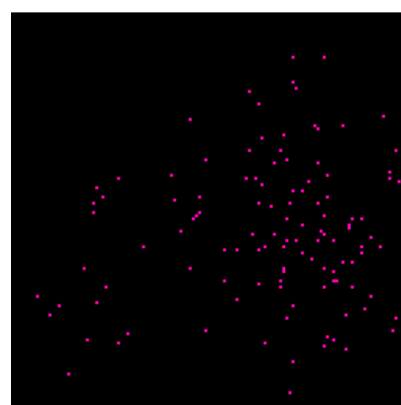

Fe Ka1

Comment:

Project: Project 1

Owner: INCA

Sample: L4B-MW-No

Type: Default

| Element | Peak | Area  | k      | Abs    | Weight% | Weight% | Atomic% |
|---------|------|-------|--------|--------|---------|---------|---------|
|         | Area | Sigma | factor | Corrn. |         | Sigma   |         |
| O K     | 1092 | 64    | 1.065  | 1.000  | 49.08   | 1.79    | 63.97   |
| Mg K    | 540  | 42    | 0.606  | 1.000  | 13.79   | 1.03    | 11.83   |
| Al K    | 291  | 33    | 0.589  | 1.000  | 7.24    | 0.81    | 5.60    |
| Si K    | 740  | 49    | 0.569  | 1.000  | 17.77   | 1.13    | 13.19   |
| K K     | 161  | 23    | 0.552  | 1.000  | 3.74    | 0.54    | 1.99    |
| Ca K    | 70   | 16    | 0.542  | 1.000  | 1.60    | 0.36    | 0.83    |
| Ti K    | 31   | 13    | 0.608  | 1.000  | 0.80    | 0.33    | 0.35    |
| Fe K    | 209  | 26    | 0.678  | 1.000  | 5.97    | 0.74    | 2.23    |
| Totals  |      |       |        |        | 100.00  |         |         |

Project: Project 1

Owner: INCA

Sample: L4B-MW-No

Type: Default

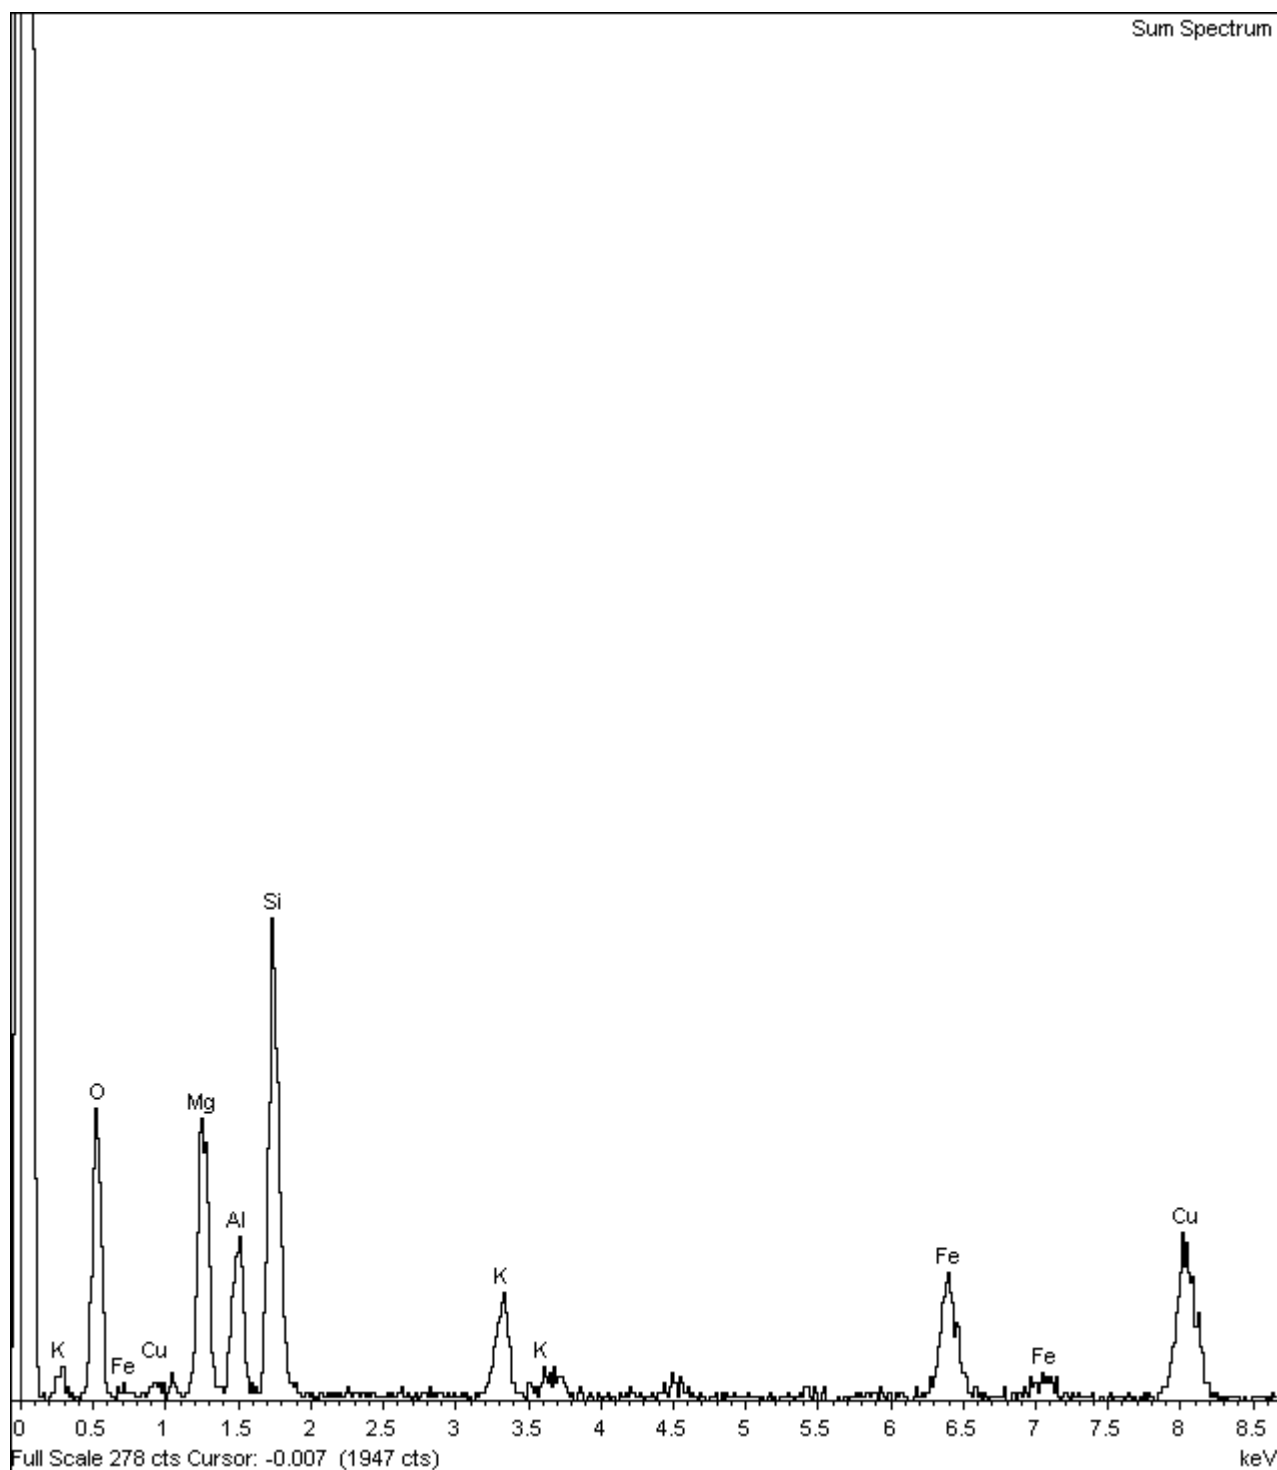

Comment:

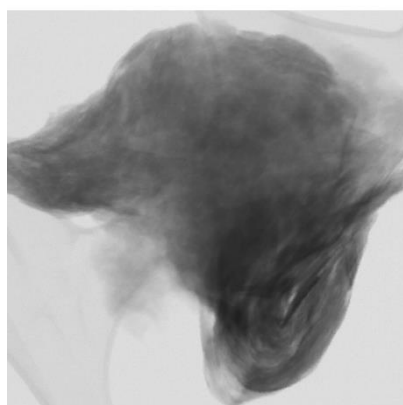

500nm Electron Image 1

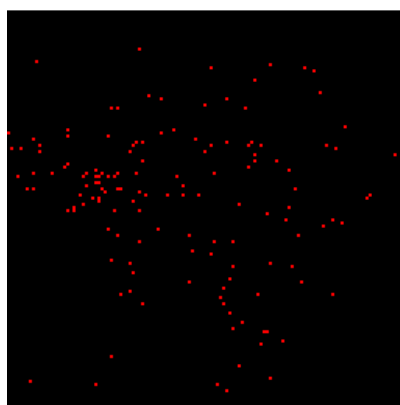

500nm O Ka1

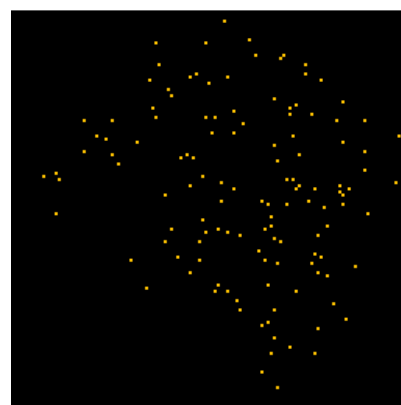

500nm Mg Ka1\_2

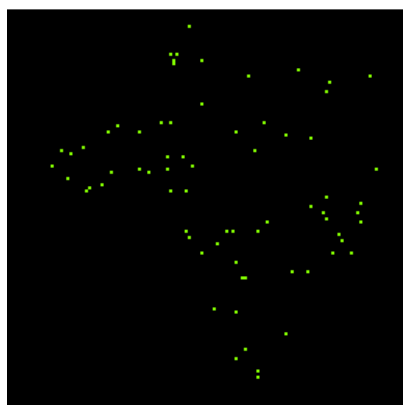

500nm Al Ka1

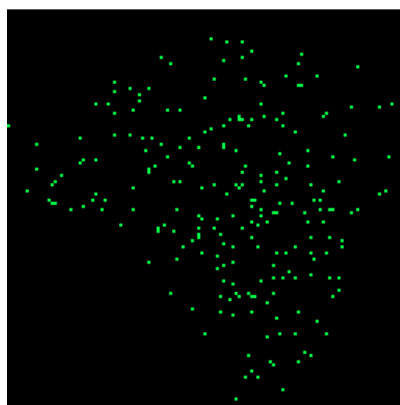

500nm Si Ka1

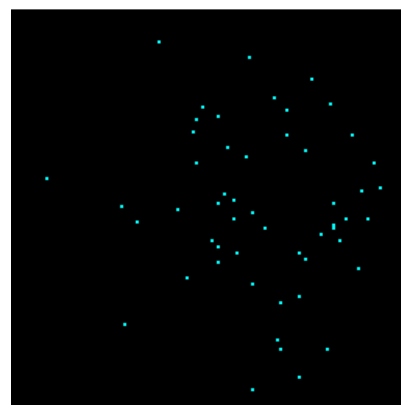

500nm K Ka1

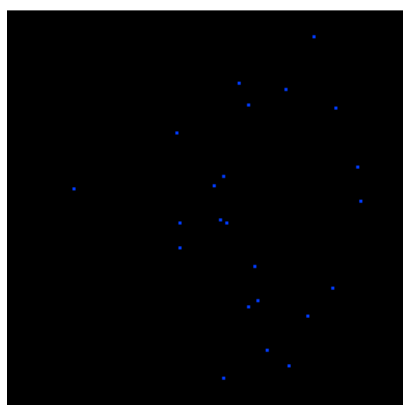

500nm Ca Ka1

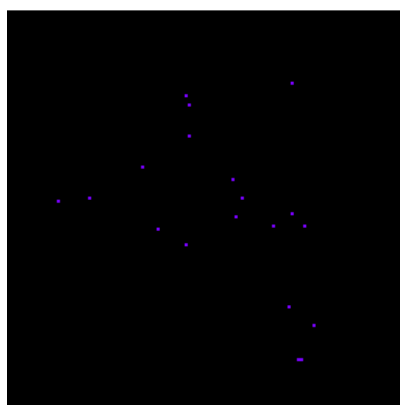

500nm Ti Ka1

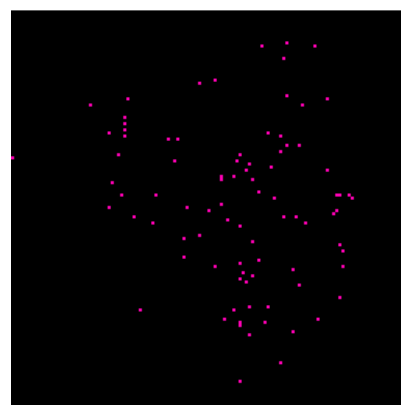

500nm Fe Ka1

Comment:

Project: Project 1

Owner: INCA

Sample: L4B-MW-No

Type: Default

| Element | Peak | Area  | k      | Abs    | Weight% | Weight% | Atomic% |
|---------|------|-------|--------|--------|---------|---------|---------|
|         | Area | Sigma | factor | Corrn. |         | Sigma   |         |
| O K     | 870  | 55    | 1.065  | 1.000  | 27.11   | 1.37    | 41.83   |
| Mg K    | 875  | 53    | 0.606  | 1.000  | 15.51   | 0.89    | 15.75   |
| Al K    | 484  | 44    | 0.589  | 1.000  | 8.36    | 0.73    | 7.65    |
| Si K    | 1561 | 70    | 0.569  | 1.000  | 25.99   | 1.07    | 22.85   |
| K K     | 453  | 39    | 0.552  | 1.000  | 7.31    | 0.62    | 4.62    |
| Ca K    | 98   | 23    | 0.542  | 1.000  | 1.56    | 0.37    | 0.96    |
| Ti K    | 74   | 20    | 0.608  | 1.000  | 1.32    | 0.35    | 0.68    |
| Fe K    | 647  | 44    | 0.678  | 1.000  | 12.84   | 0.83    | 5.68    |
| Totals  |      |       |        |        | 100.00  |         |         |

Project: Project 1

Owner: INCA

Sample: L4B-MW-No

Type: Default

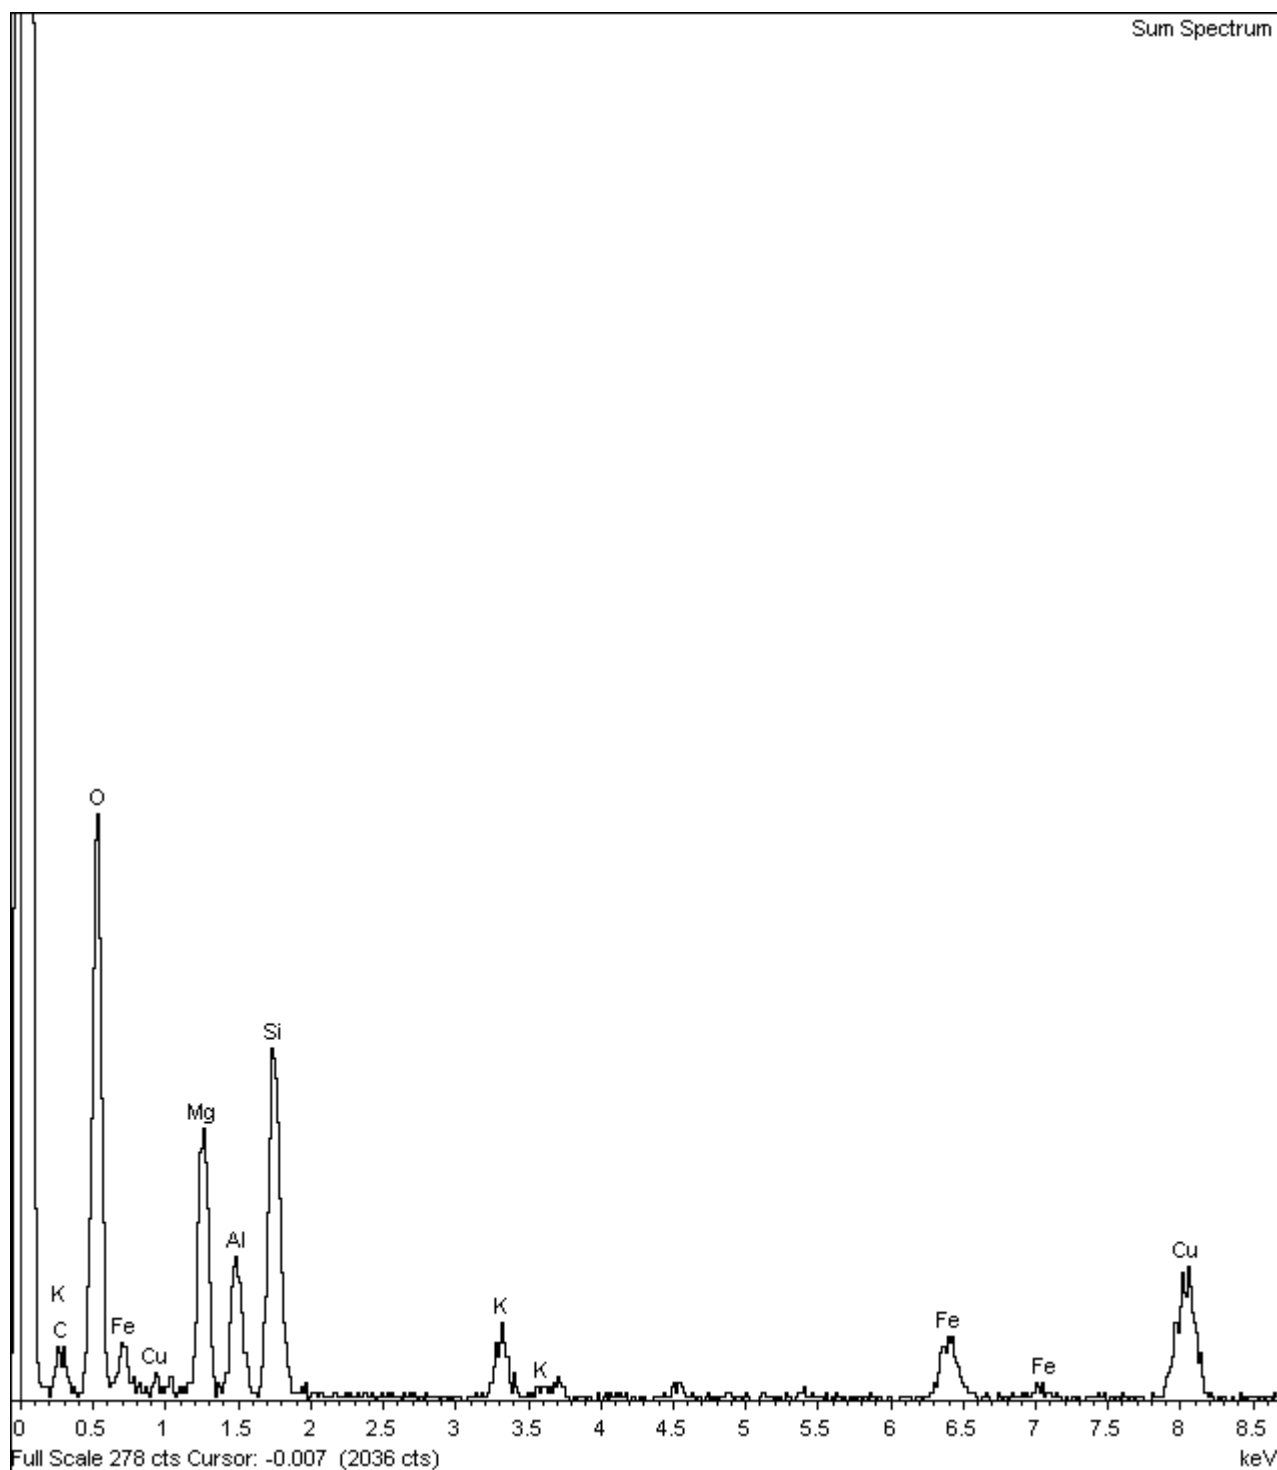

Comment:

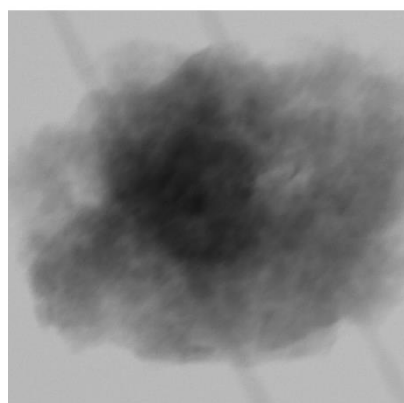

500nm Electron Image 1

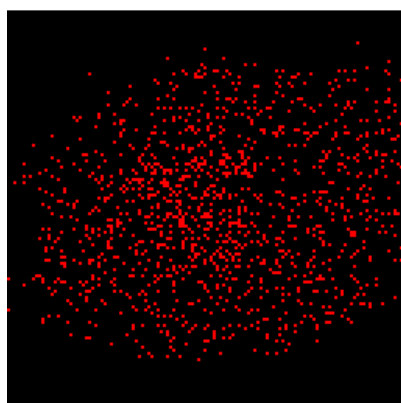

500nm O Ka1

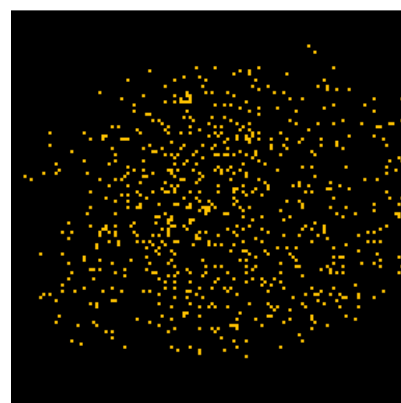

500nm Mg Ka1\_2

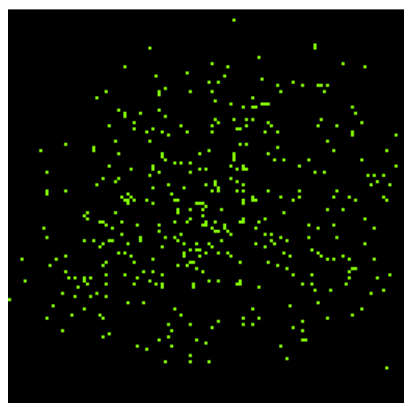

500nm Al Ka1

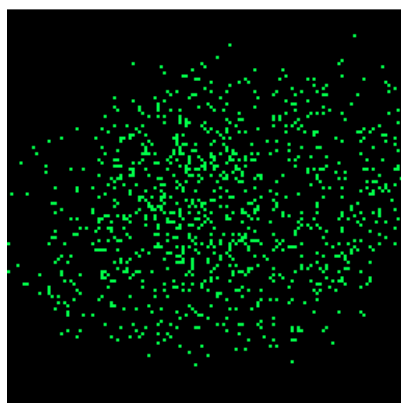

500nm Si Ka1

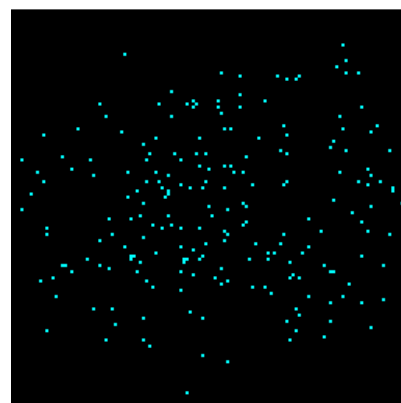

500nm K Ka1

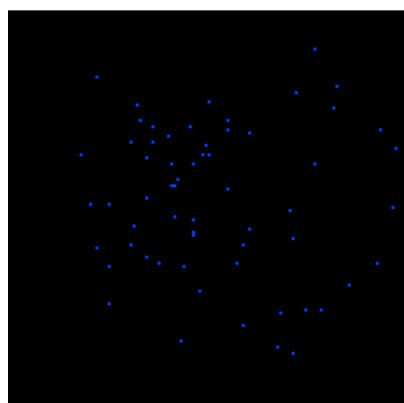

500nm Ca Ka1

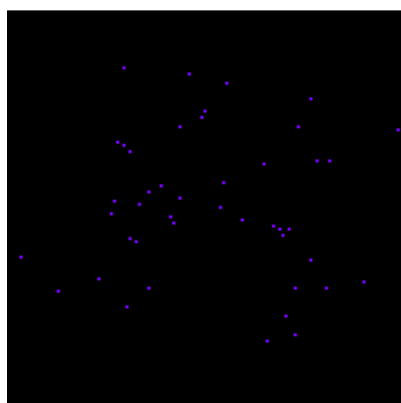

500nm Ti Ka1

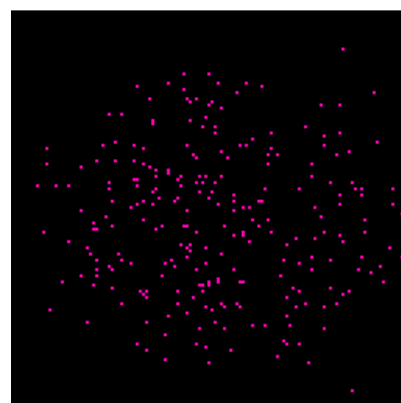

500nm Fe Ka1

Comment:



Project: Project 1

Owner: INCA

Sample: L4B-MW-No

Type: Default

| Element | Peak | Area  | k      | Abs    | Weight% | Weight% | Atomic% |
|---------|------|-------|--------|--------|---------|---------|---------|
|         | Area | Sigma | factor | Corrn. |         | Sigma   |         |
| O K     | 1716 | 81    | 1.065  | 1.000  | 48.16   | 1.43    | 63.06   |
| Mg K    | 886  | 53    | 0.606  | 1.000  | 14.14   | 0.82    | 12.18   |
| Al K    | 450  | 43    | 0.589  | 1.000  | 7.00    | 0.65    | 5.43    |
| Si K    | 1246 | 64    | 0.569  | 1.000  | 18.68   | 0.93    | 13.93   |
| K K     | 292  | 31    | 0.552  | 1.000  | 4.25    | 0.45    | 2.28    |
| Ca K    | 64   | 19    | 0.542  | 1.000  | 0.92    | 0.27    | 0.48    |
| Ti K    | 63   | 17    | 0.608  | 1.000  | 1.00    | 0.27    | 0.44    |
| Fe K    | 328  | 33    | 0.678  | 1.000  | 5.85    | 0.58    | 2.19    |
| Totals  |      |       |        |        | 100.00  |         |         |

Project: Project 1

Owner: INCA

Sample: L4B-MW-No

Type: Default

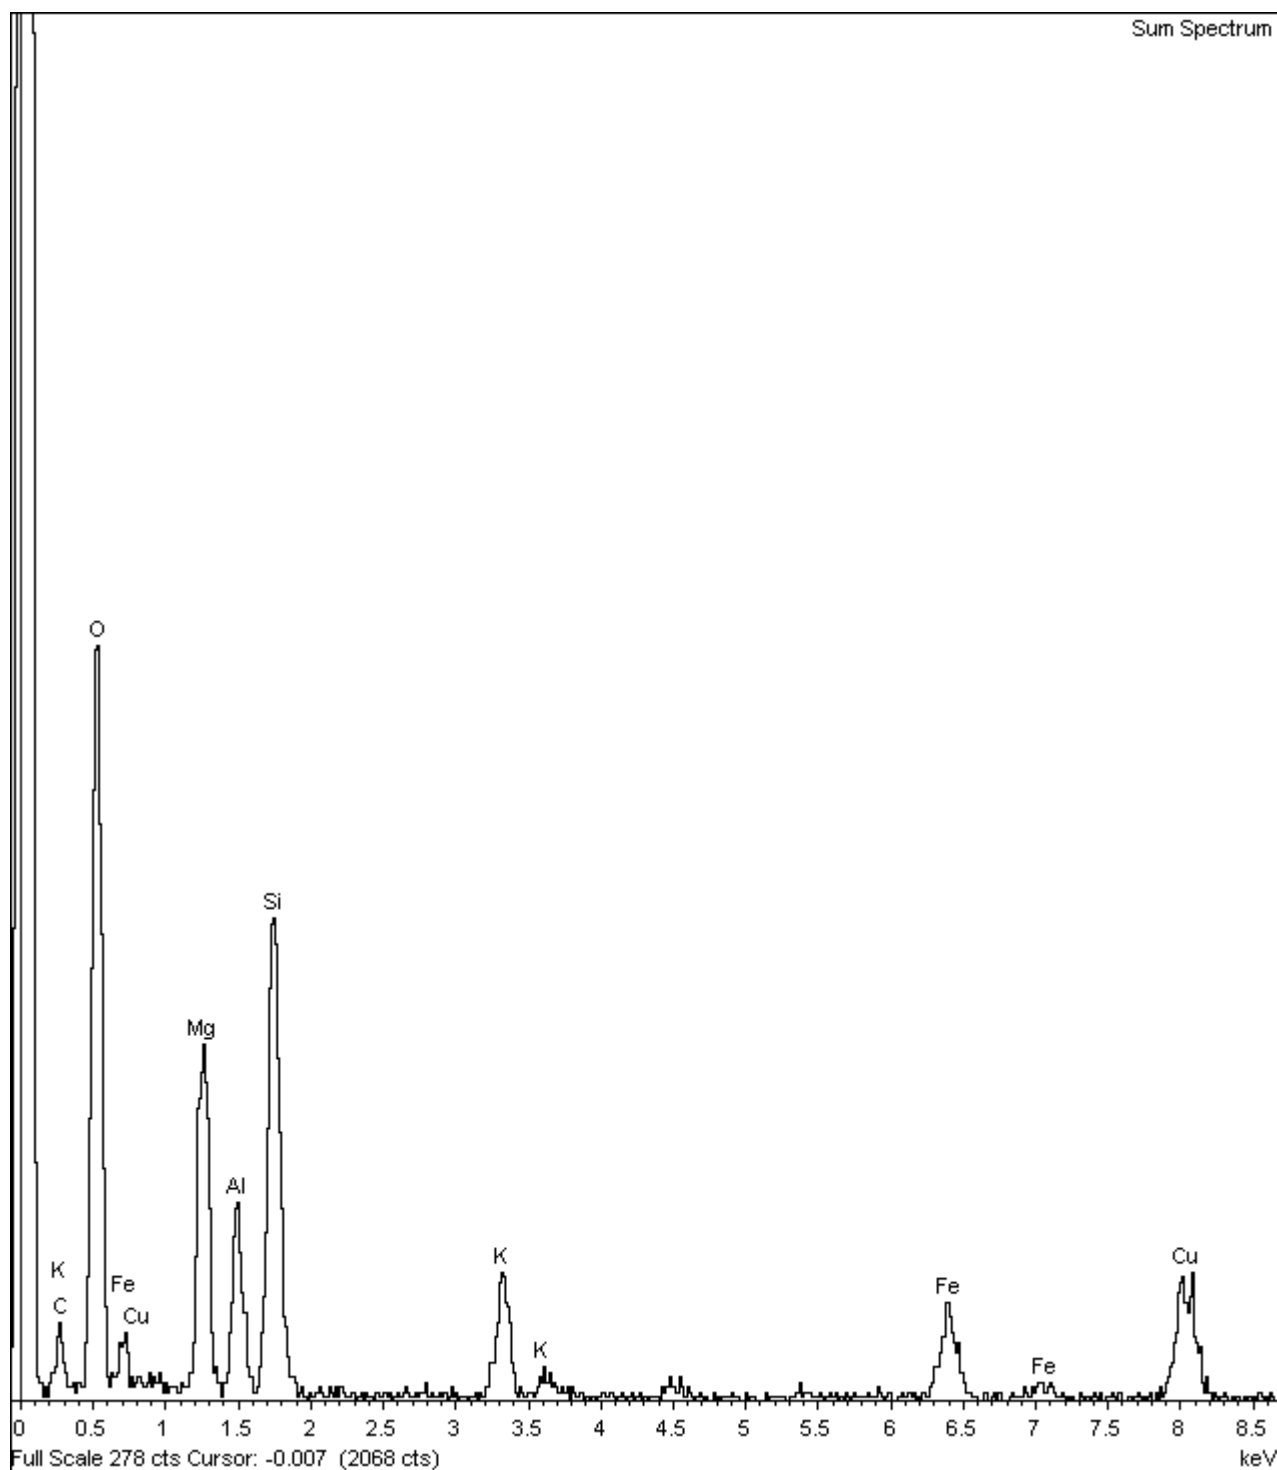

Comment:

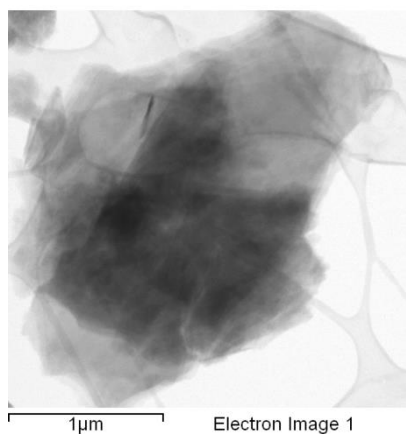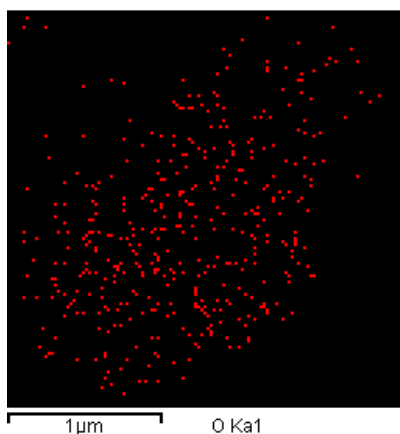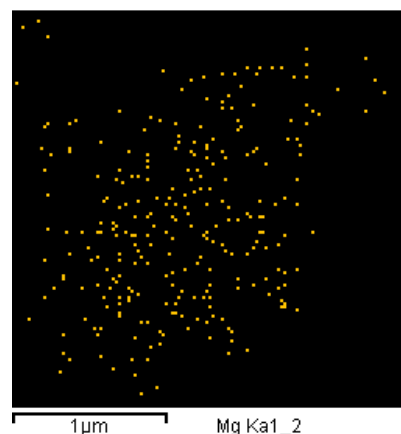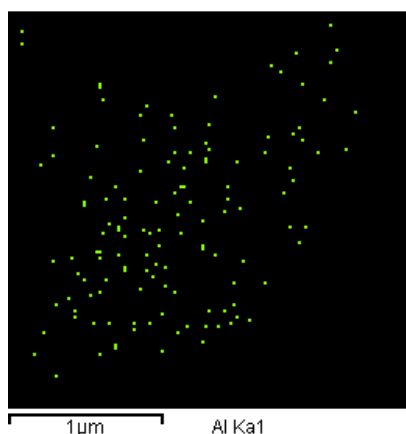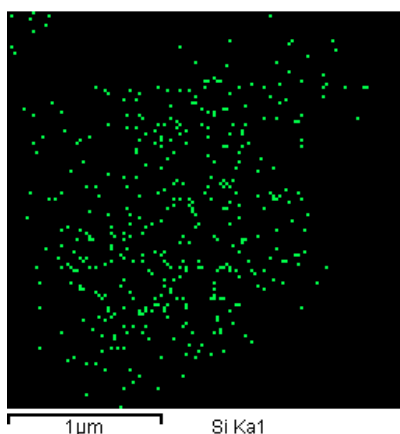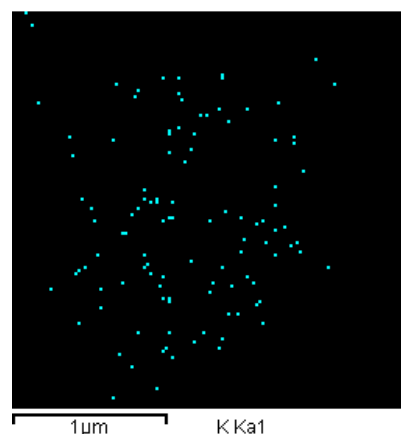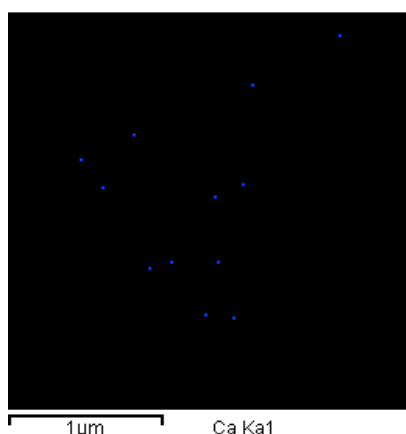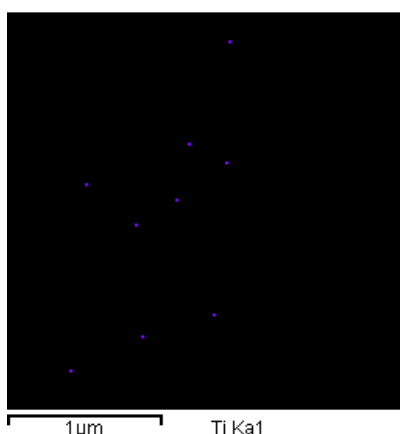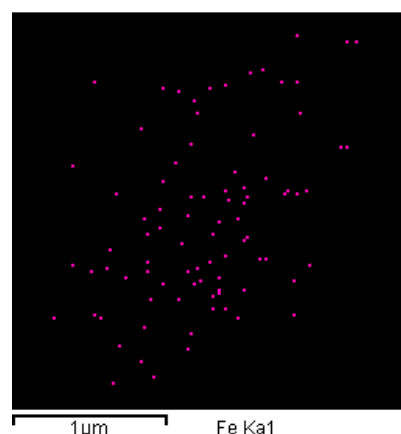

Comment:

Project: Project 1

Owner: INCA

Sample: L4B-MW-No

Type: Default

| Element | Peak | Area  | k      | Abs    | Weight% | Weight% | Atomic% |
|---------|------|-------|--------|--------|---------|---------|---------|
|         | Area | Sigma | factor | Corrn. |         | Sigma   |         |
| O K     | 2203 | 94    | 1.065  | 1.000  | 46.11   | 1.26    | 61.31   |
| Mg K    | 1185 | 62    | 0.606  | 1.000  | 14.10   | 0.71    | 12.34   |
| Al K    | 581  | 48    | 0.589  | 1.000  | 6.73    | 0.55    | 5.31    |
| Si K    | 1759 | 76    | 0.569  | 1.000  | 19.68   | 0.82    | 14.90   |
| K K     | 541  | 42    | 0.552  | 1.000  | 5.87    | 0.45    | 3.19    |
| Ca K    | 30   | 21    | 0.542  | 1.000  | 0.32    | 0.22    | 0.17    |
| Ti K    | 62   | 19    | 0.608  | 1.000  | 0.74    | 0.23    | 0.33    |
| Fe K    | 484  | 38    | 0.678  | 1.000  | 6.44    | 0.50    | 2.45    |
| Totals  |      |       |        |        | 100.00  |         |         |



Project: Project 1

Owner: INCA

Sample: L4B-MW-No

Type: Default

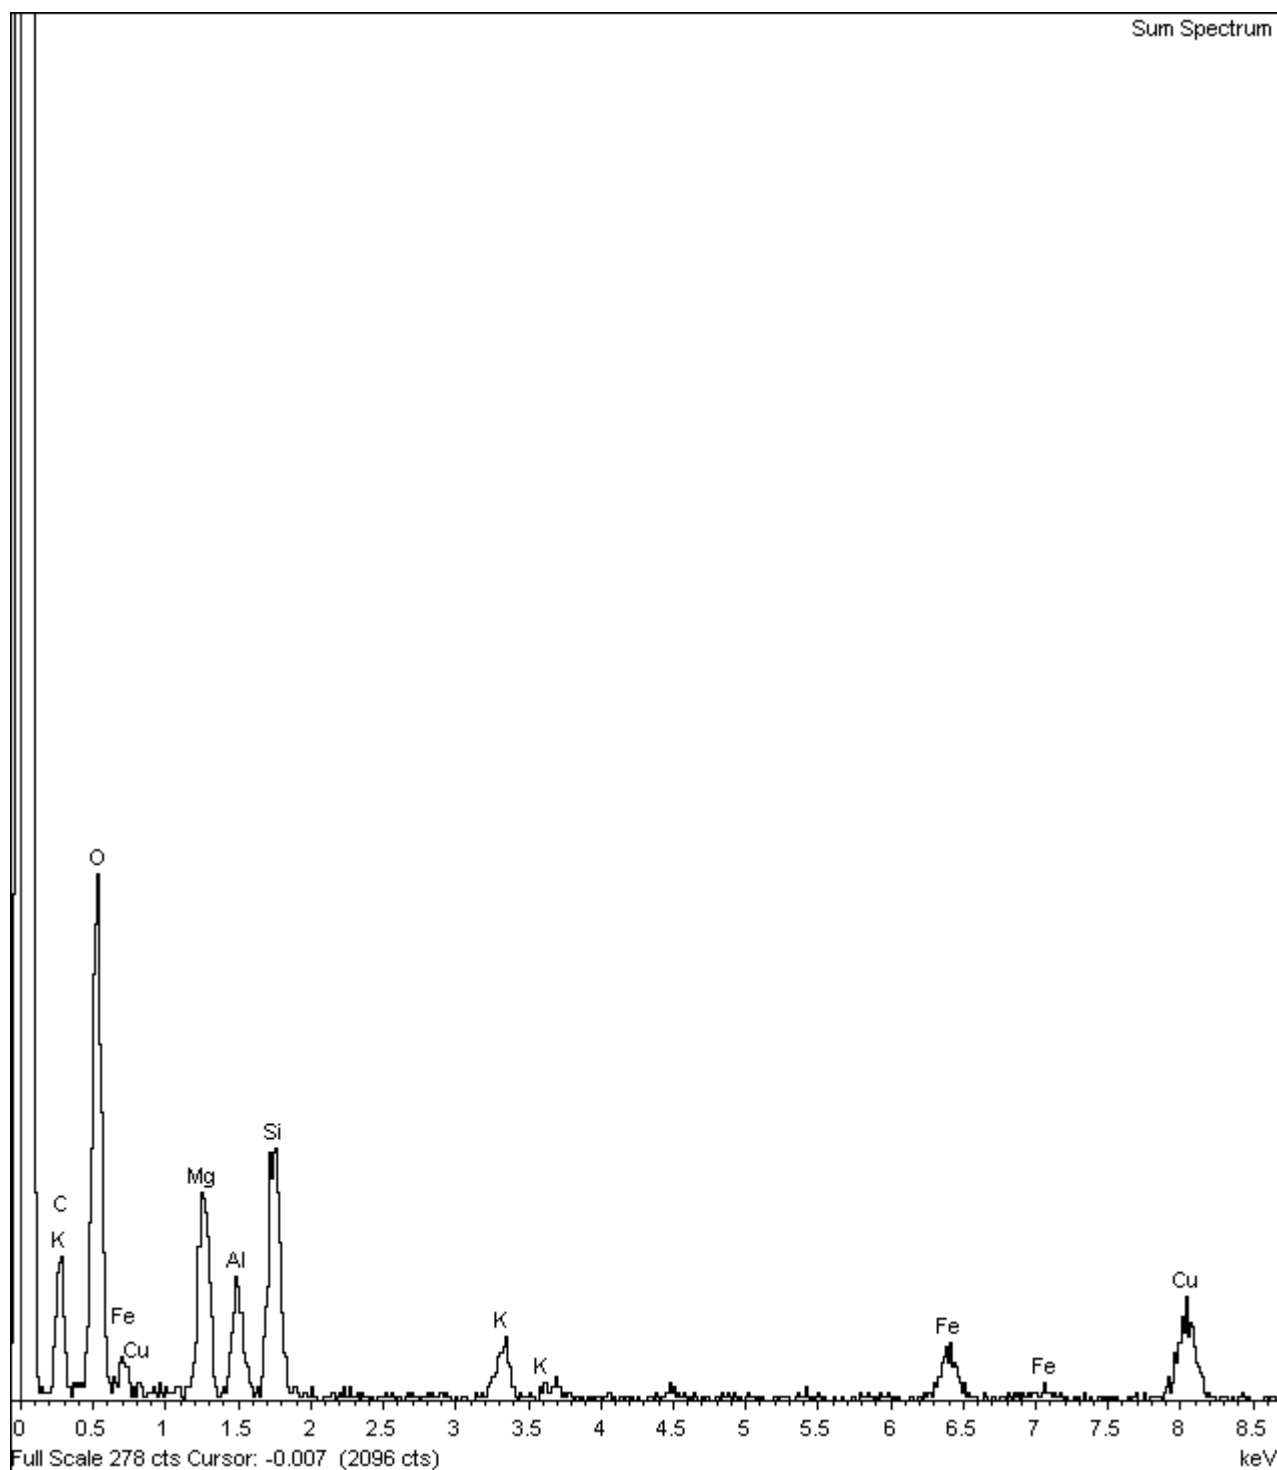

Comment:

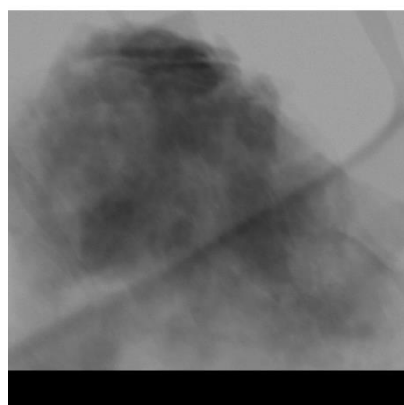

Electron Image 1

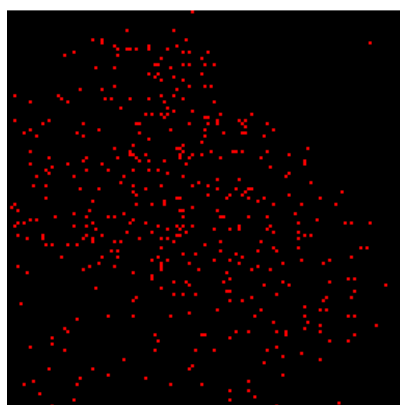

O Ka1

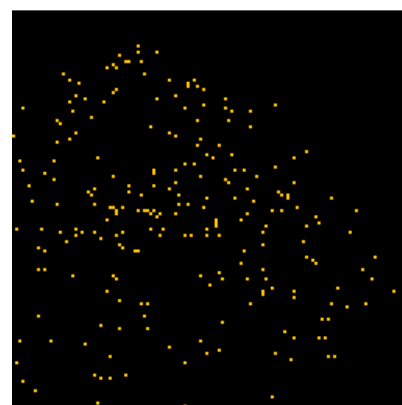

Mg Ka1\_2

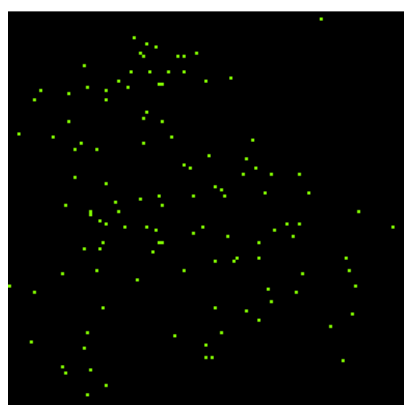

Al Ka1

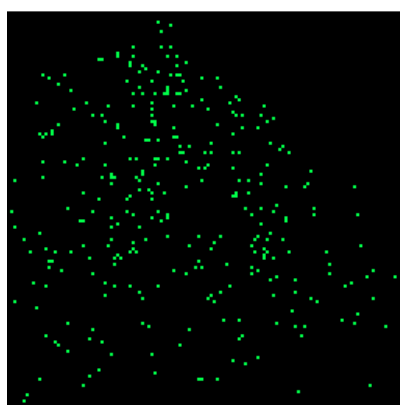

Si Ka1

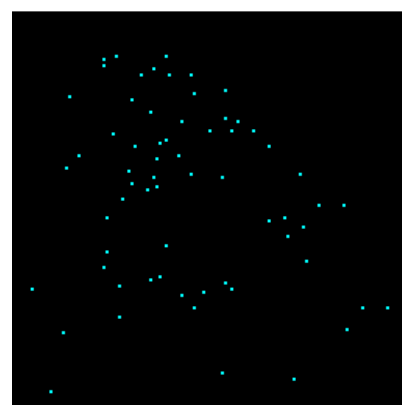

K Ka1

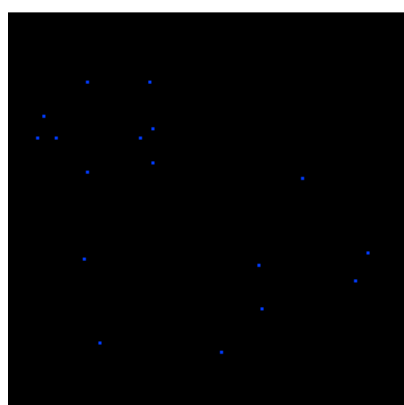

Ca Ka1

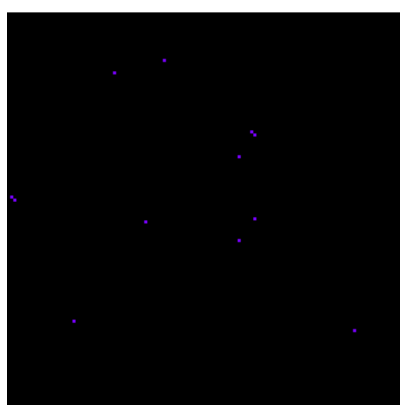

Ti Ka1

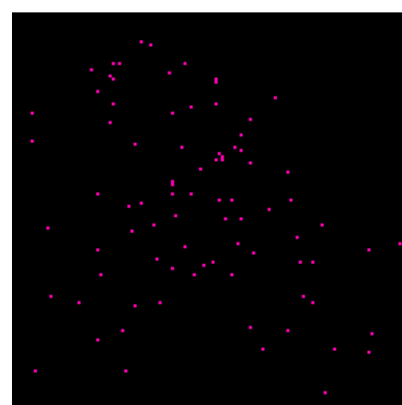

Fe Ka1

Comment:

Project: Project 1

Owner: INCA

Sample: L4B-MW-No

Type: Default

Label : Sum Spectrum

Collected : 13-May-2014 04:35 PM

Livetime (s) : 137.63

Real time (s) : 0.00

Detector : X-Max

Window : SATW

Tilt (deg) : 0.0

Elevation (deg) : 17.7

Azimuth (deg) : 0.0

Sample thickness: 0.0 nm

Sample density: 0.00 g/cm<sup>3</sup>

Spectrum processing :

Peak possibly omitted : 8.038 keV

Quantitation method : Cliff Lorimer thin ratio section.

Processing option : All elements analyzed (Normalised)

Number of iterations = 1

Standardless

| Element | Peak | Area  | k      | Abs    | Weight% | Weight% | Atomic% |
|---------|------|-------|--------|--------|---------|---------|---------|
|         | Area | Sigma | factor | Corrn. |         | Sigma   |         |
| O K     | 1485 | 75    | 1.065  | 1.000  | 51.91   | 1.57    | 66.50   |



|        |     |    |       |       |        |      |       |
|--------|-----|----|-------|-------|--------|------|-------|
| Mg K   | 642 | 47 | 0.606 | 1.000 | 12.77  | 0.91 | 10.77 |
| Al K   | 348 | 38 | 0.589 | 1.000 | 6.73   | 0.71 | 5.12  |
| Si K   | 938 | 55 | 0.569 | 1.000 | 17.51  | 1.00 | 12.78 |
| K K    | 214 | 28 | 0.552 | 1.000 | 3.87   | 0.50 | 2.03  |
| Ca K   | 47  | 18 | 0.542 | 1.000 | 0.83   | 0.31 | 0.42  |
| Ti K   | 34  | 14 | 0.608 | 1.000 | 0.67   | 0.27 | 0.29  |
| Fe K   | 256 | 29 | 0.678 | 1.000 | 5.70   | 0.63 | 2.09  |
| Totals |     |    |       |       | 100.00 |      |       |
