# Supplementary material for: Heterogeneous Distribution of Interlayer Cations and Iron as a Plausible Explanation of the Non-Exfoliation of Commercial Vermiculites Post Alcohol Treatment and Microwave Irradiation
Source: MDPI journal article supplement (doi:10.3390/min11080835), 2021-08-01
Supplement: s1 [file s1]

Project: Project 1

Owner: INCA

Sample: CHG-4M-MW-No

Type: Default

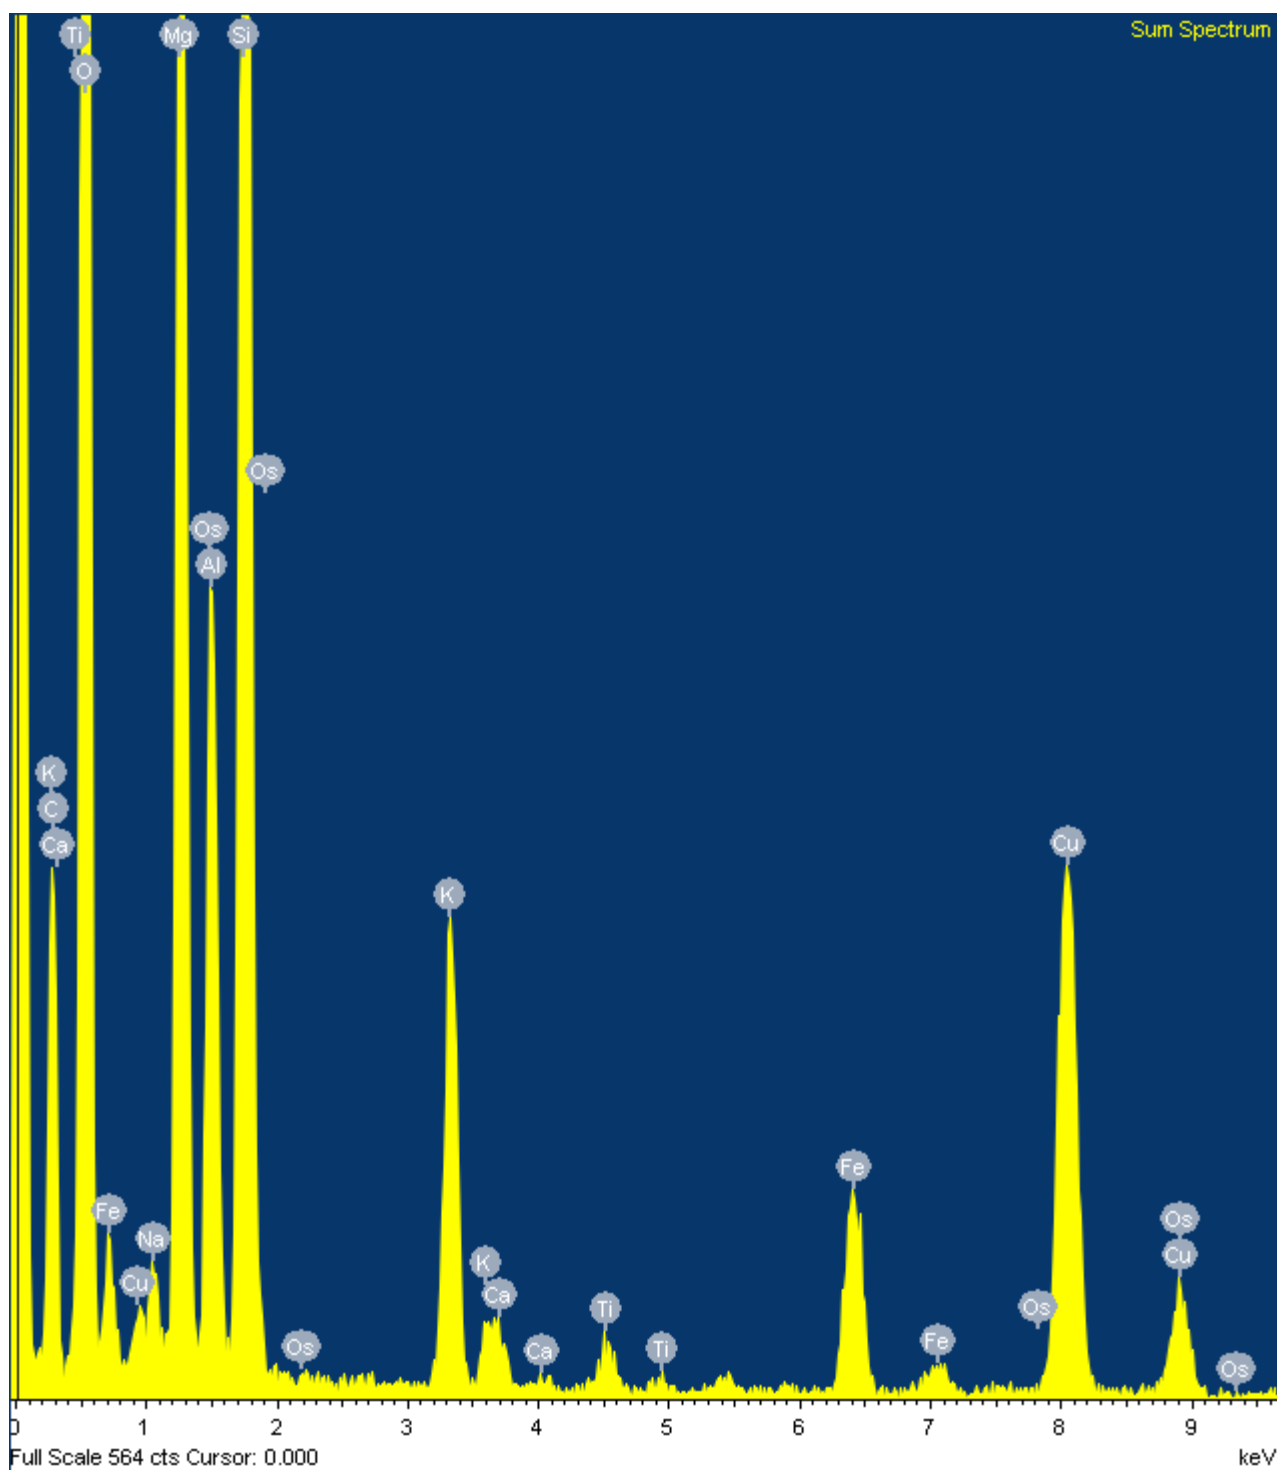

Comment:

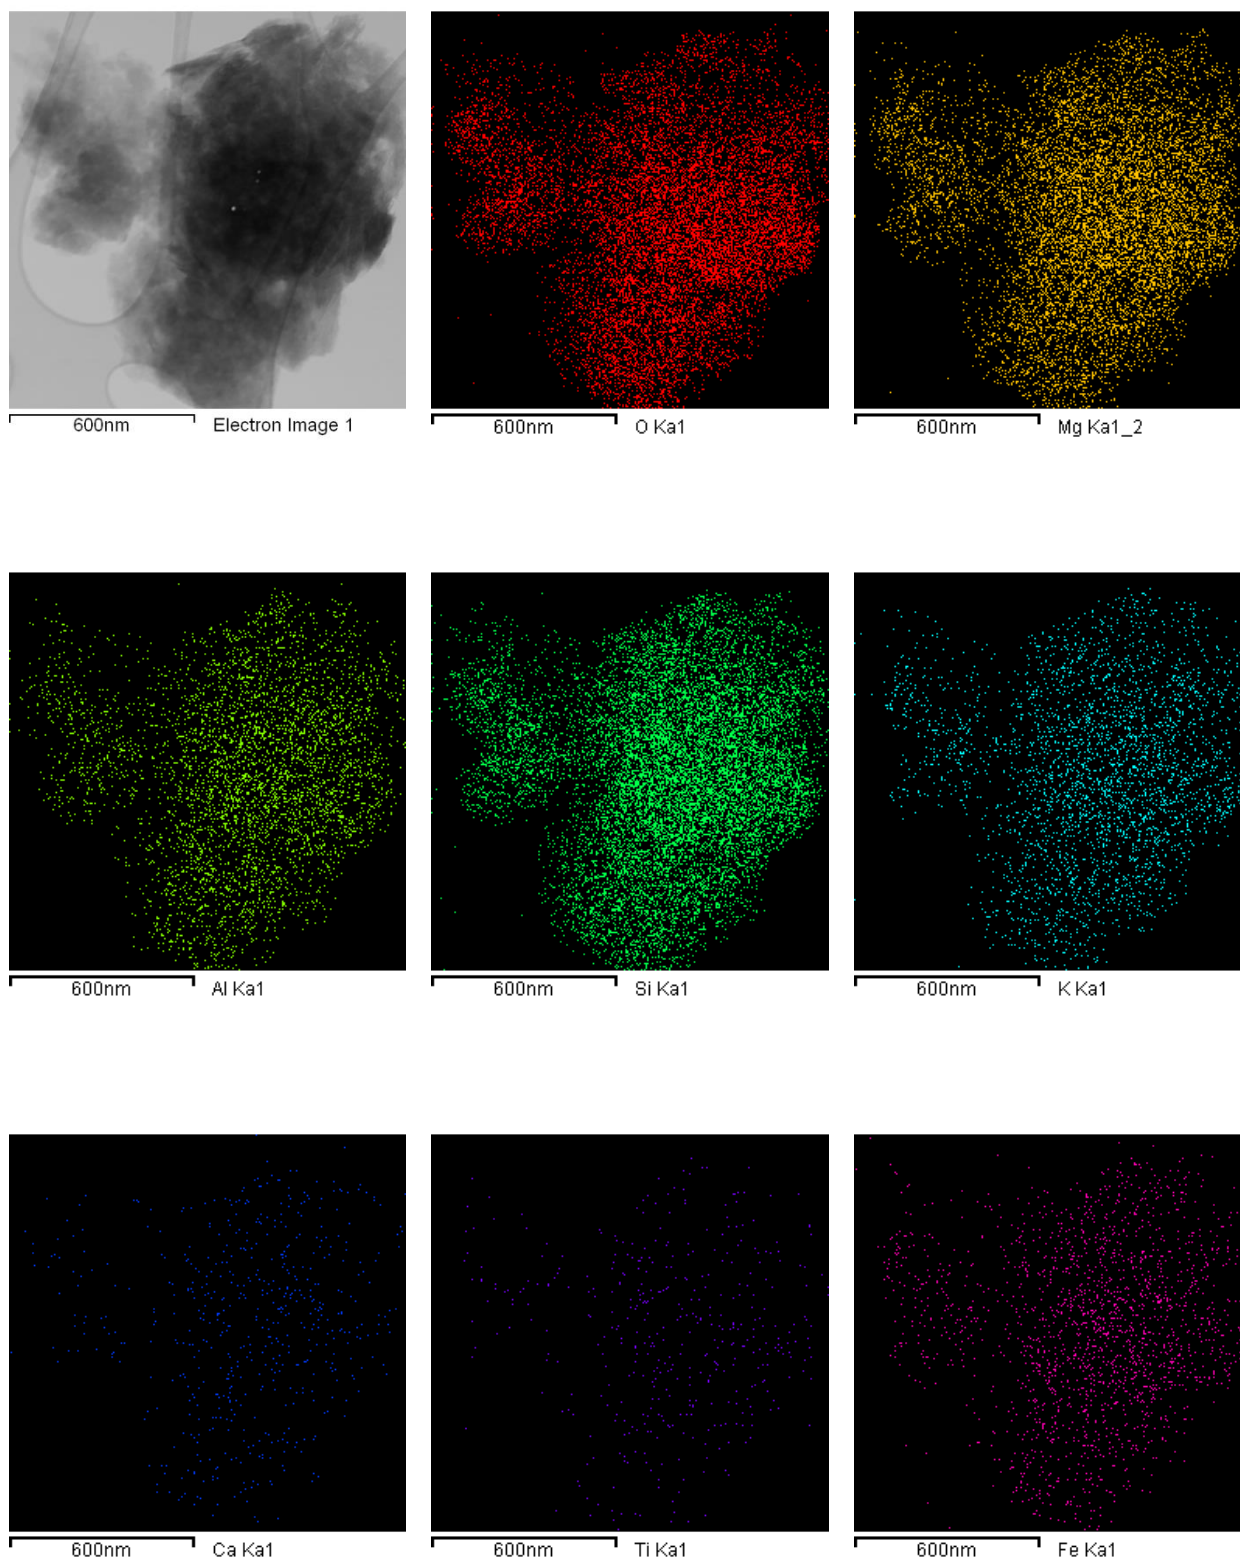

Comment:

Project: Project 1

Owner: INCA

Sample: CHG-4M-MW-No

Type: Default

| Element | Peak  | Area  | k      | Abs   | Weight% | Weight% | Atomic% |
|---------|-------|-------|--------|-------|---------|---------|---------|
|         | Area  | Sigma | factor | Corn. |         | Sigma   |         |
| O K     | 17498 | 243   | 1.065  | 1.000 | 42.83   | 0.40    | 57.35   |
| Mg K    | 12257 | 197   | 0.606  | 1.000 | 17.06   | 0.26    | 15.04   |
| Al K    | 5317  | 148   | 0.589  | 1.000 | 7.20    | 0.19    | 5.72    |
| Si K    | 16396 | 227   | 0.569  | 1.000 | 21.45   | 0.28    | 16.36   |
| K K     | 4800  | 124   | 0.552  | 1.000 | 6.09    | 0.15    | 3.34    |
| Ca K    | 514   | 62    | 0.542  | 1.000 | 0.64    | 0.08    | 0.34    |
| Ti K    | 462   | 51    | 0.608  | 1.000 | 0.65    | 0.07    | 0.29    |
| Fe K    | 2615  | 91    | 0.678  | 1.000 | 4.07    | 0.14    | 1.56    |
| Totals  |       |       |        |       | 100.00  |         |         |

Project: Project 1

Owner: INCA

Sample: CHG-4M-MW-No

Type: Default

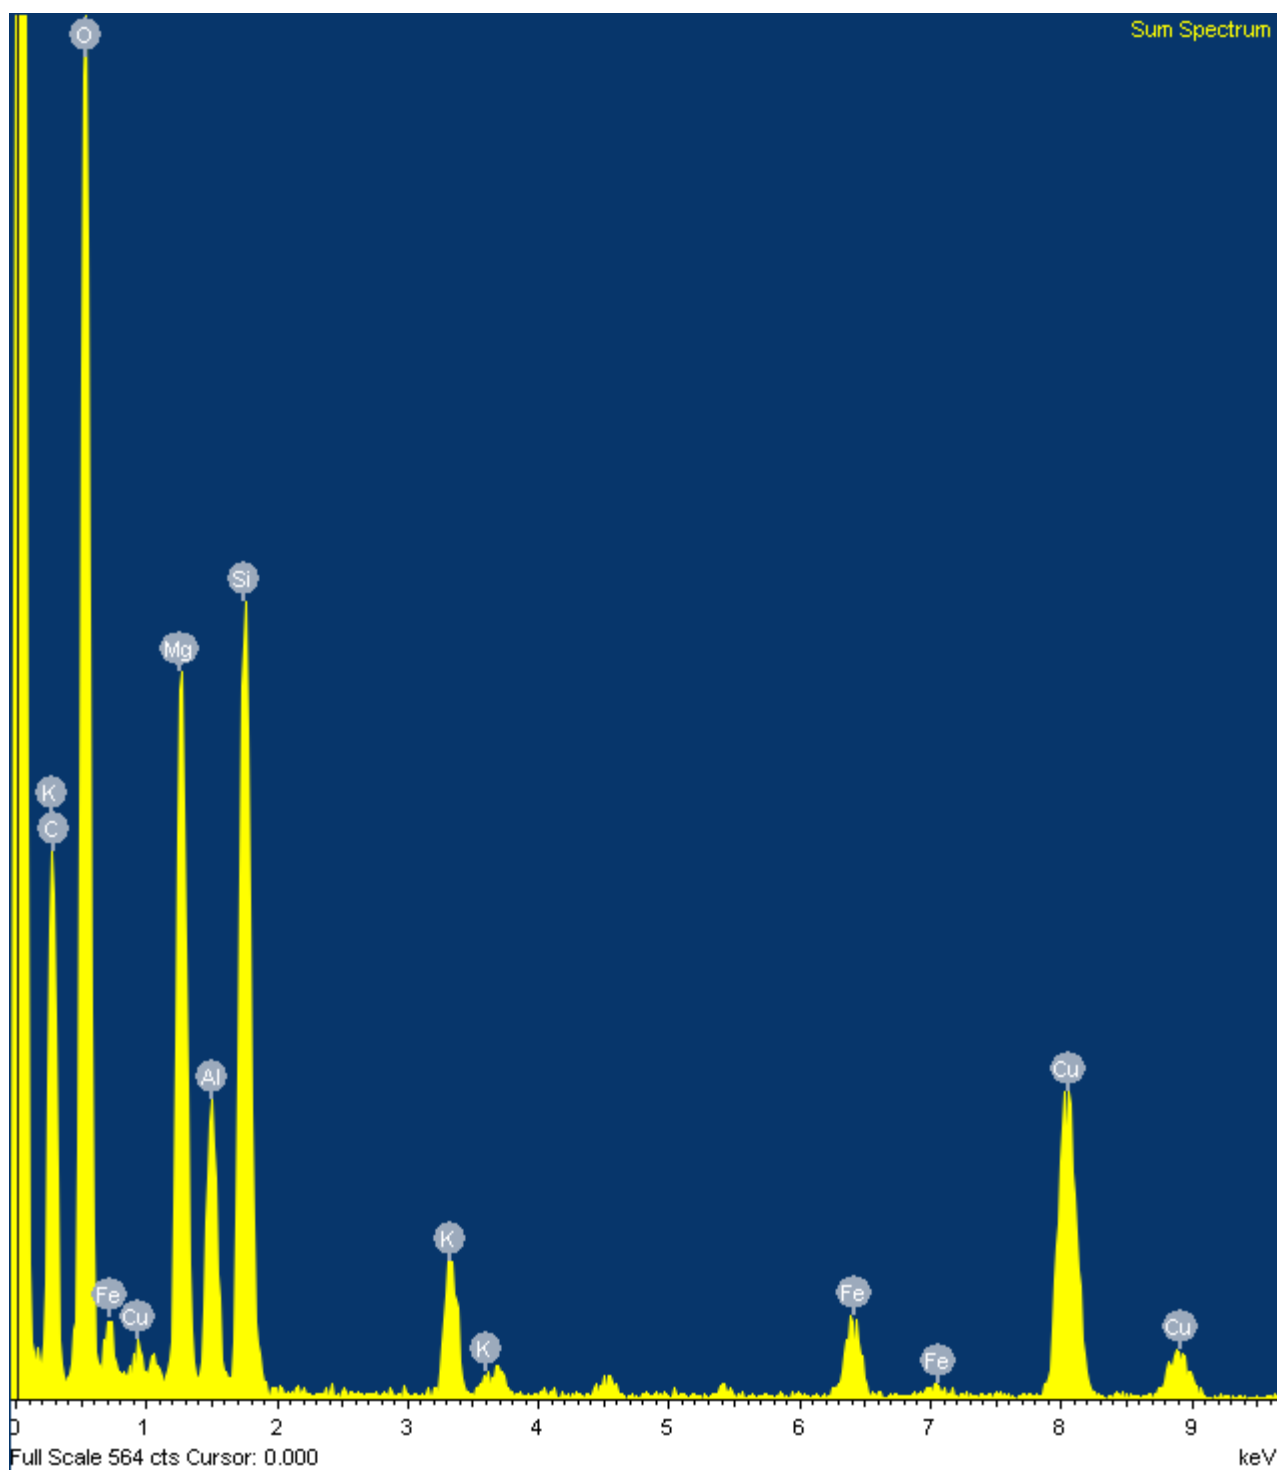

Comment:

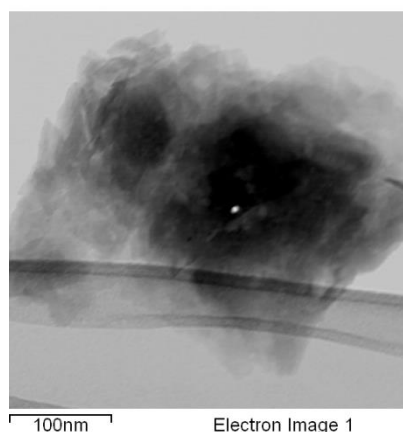

Electron Image 1

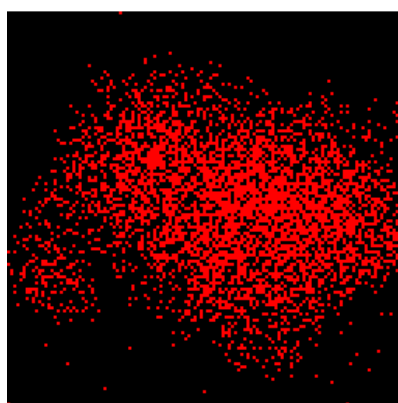

O Ka1

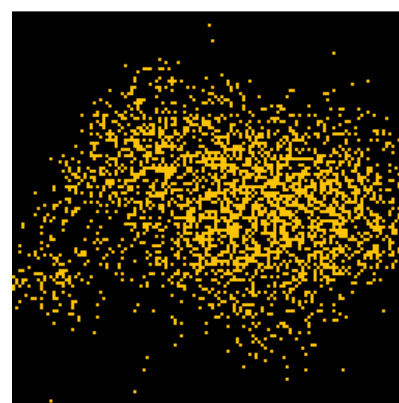

Mg Ka1\_2

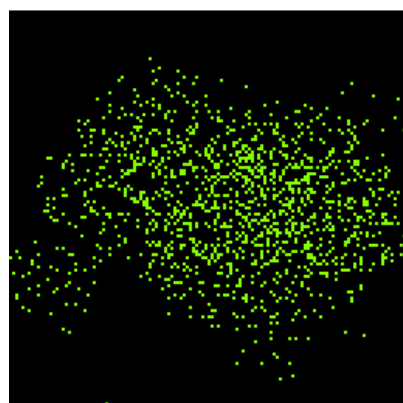

Al Ka1

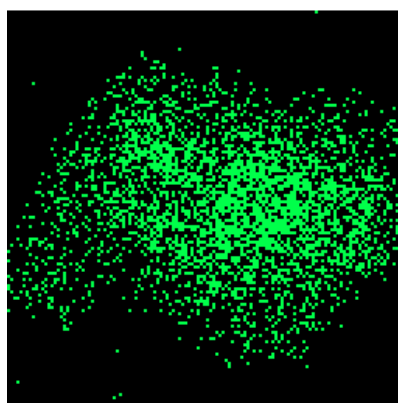

Si Ka1

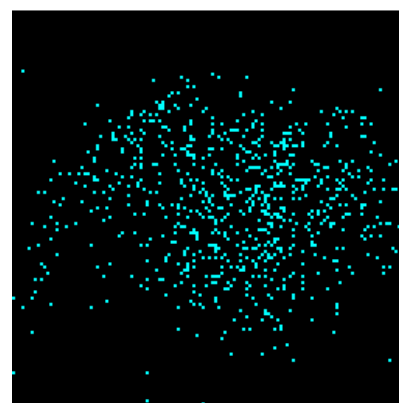

K Ka1

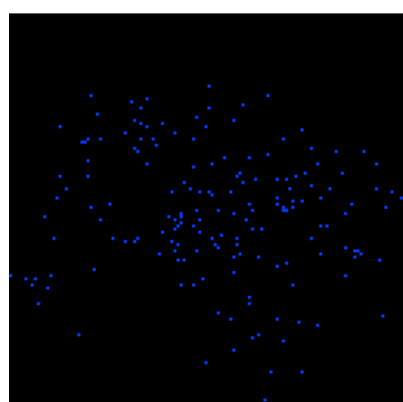

Ca Ka1

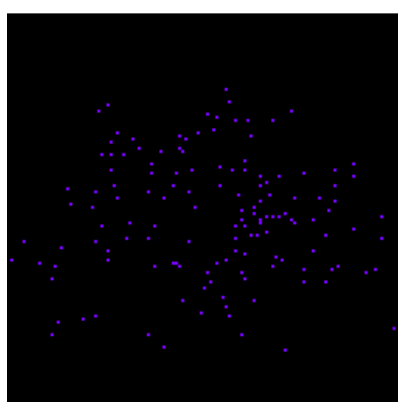

Ti Ka1

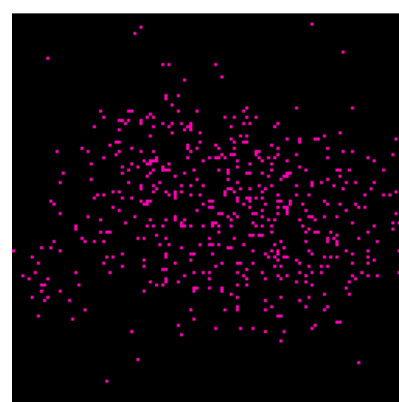

Fe Ka1

Comment:

Project: Project 1

Owner: INCA

Sample: CHG-4M-MW-No

Type: Default

| Element | Peak | Area  | k      | Abs    | Weight% | Weight% | Atomic% |
|---------|------|-------|--------|--------|---------|---------|---------|
|         | Area | Sigma | factor | Corrn. |         | Sigma   |         |
| O K     | 8369 | 170   | 1.065  | 1.000  | 50.05   | 0.63    | 63.95   |
| Mg K    | 4699 | 123   | 0.606  | 1.000  | 15.98   | 0.40    | 13.44   |
| Al K    | 1901 | 90    | 0.589  | 1.000  | 6.29    | 0.29    | 4.77    |
| Si K    | 5984 | 138   | 0.569  | 1.000  | 19.12   | 0.42    | 13.92   |
| K K     | 1354 | 68    | 0.552  | 1.000  | 4.19    | 0.21    | 2.19    |
| Ca K    | 208  | 36    | 0.542  | 1.000  | 0.63    | 0.11    | 0.32    |
| Ti K    | 173  | 31    | 0.608  | 1.000  | 0.59    | 0.11    | 0.25    |
| Fe K    | 826  | 53    | 0.678  | 1.000  | 3.14    | 0.20    | 1.15    |
| Totals  |      |       |        |        | 100.00  |         |         |

Sample: CHG-4M-MW-No

Type: Default

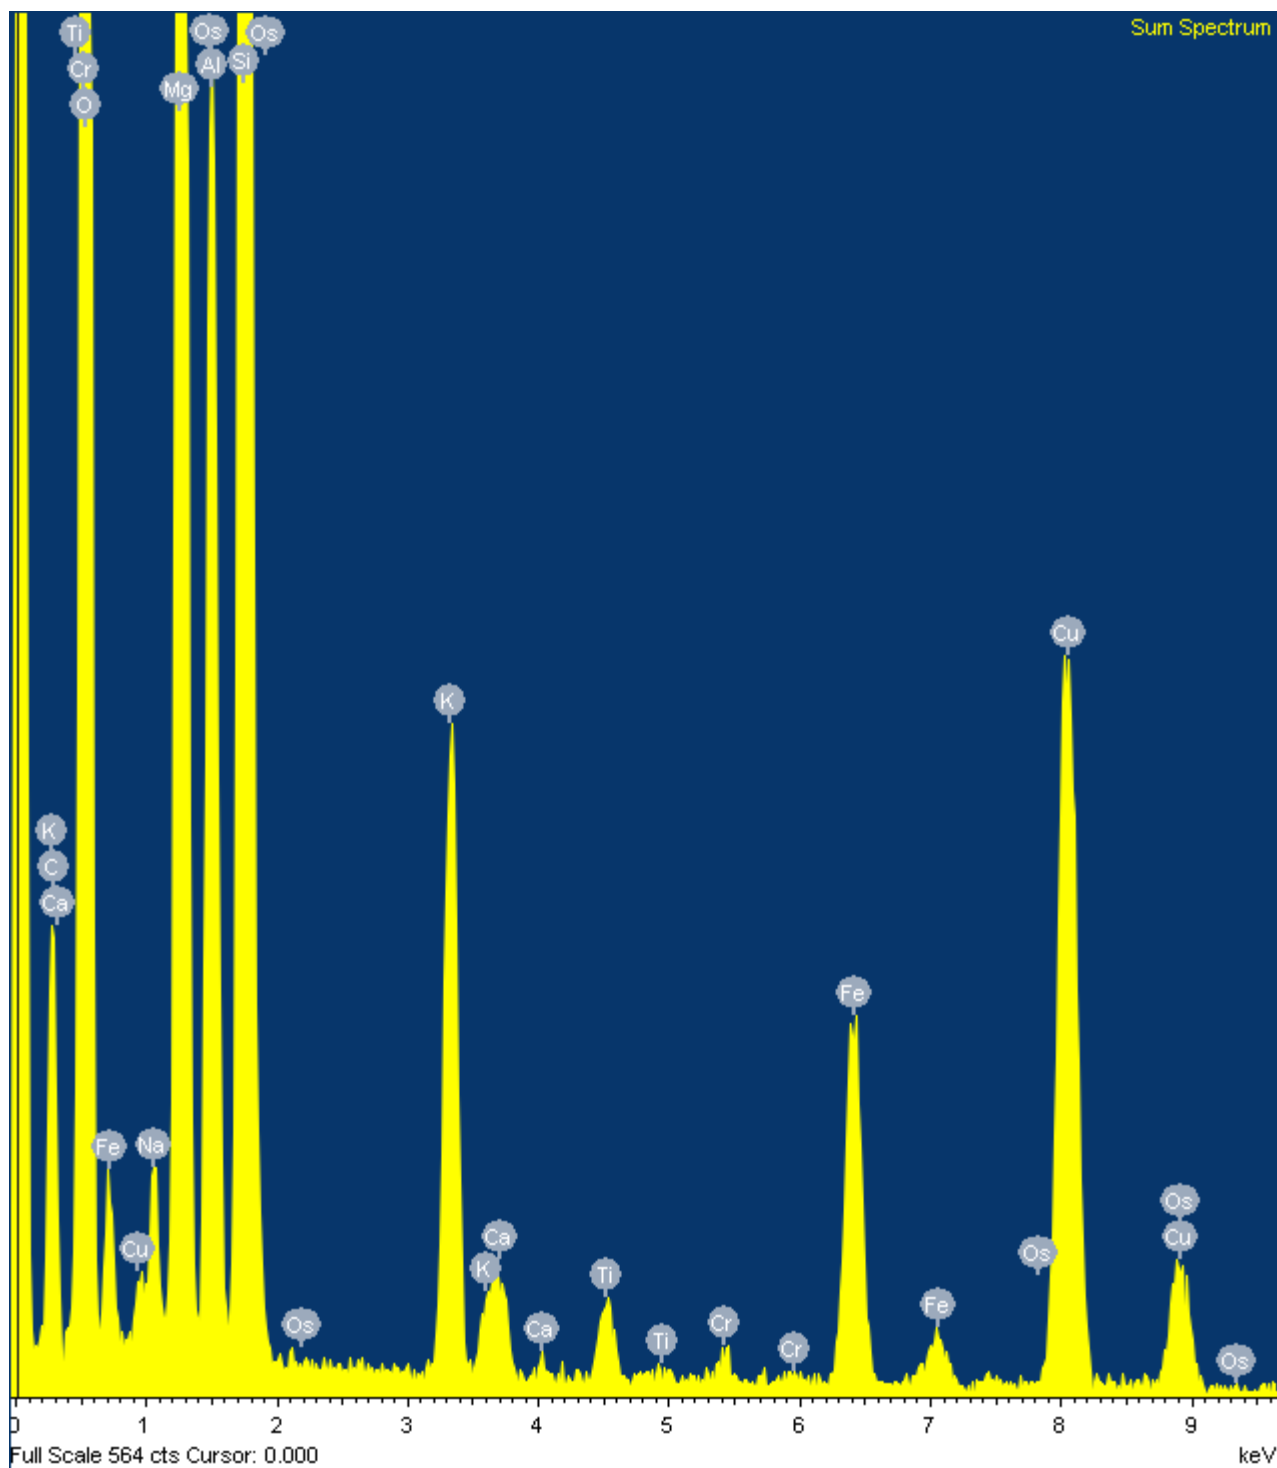

Comment:



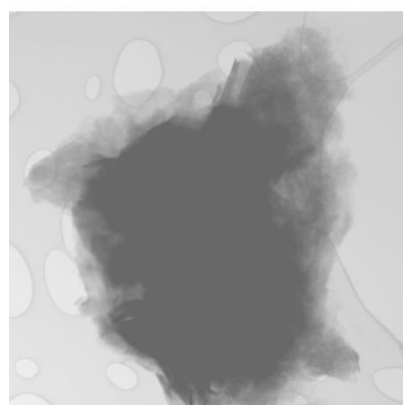

Electron Image 1

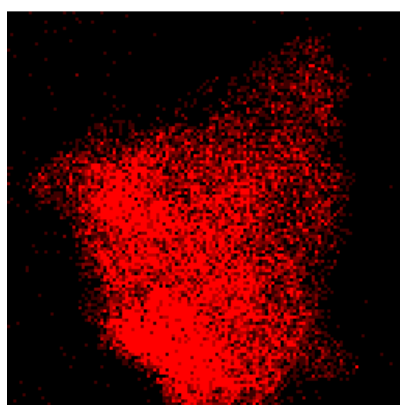

O Ka1

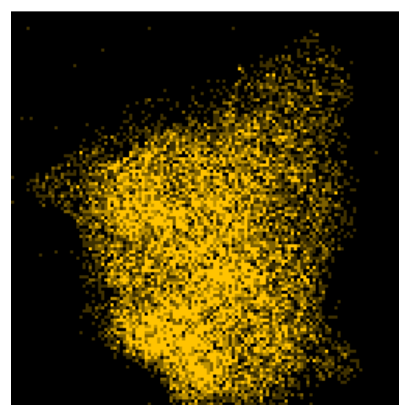

Mg Ka1\_2

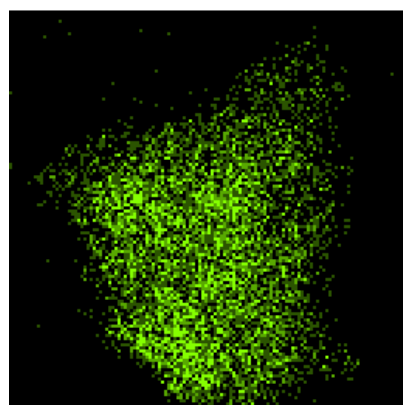

Al Ka1

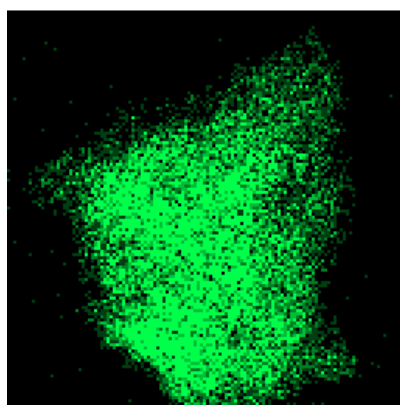

Si Ka1

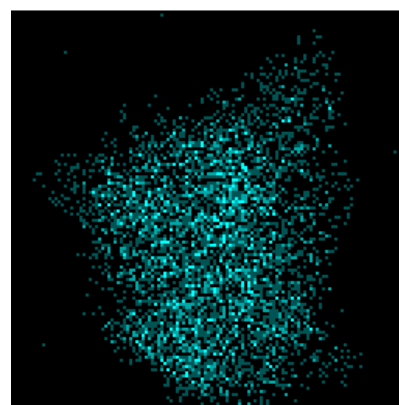

K Ka1

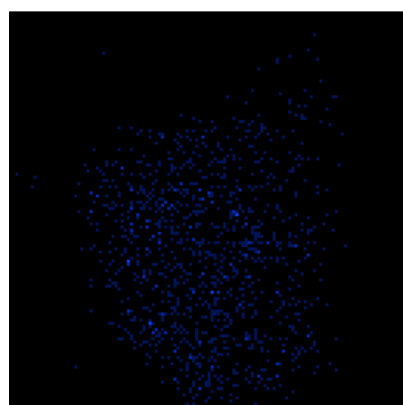

Ca Ka1

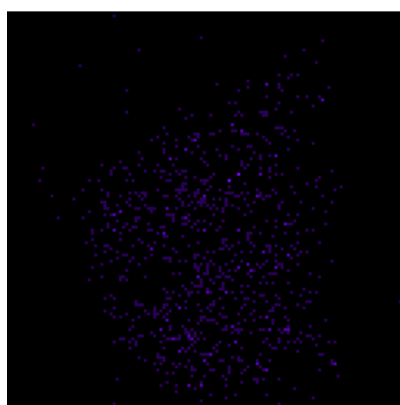

Ti Ka1

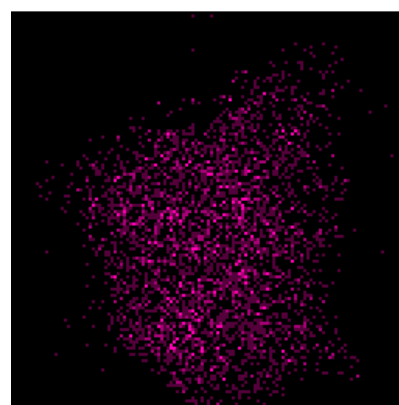

Fe Ka1

Comment:

Project: Project 1

Owner: INCA

Sample: CHG-4M-MW-No

Type: Default

| Element | Peak  | Area  | k      | Abs   | Weight% | Weight% | Atomic% |
|---------|-------|-------|--------|-------|---------|---------|---------|
|         | Area  | Sigma | factor | Corn. |         | Sigma   |         |
| O K     | 28722 | 310   | 1.065  | 1.000 | 42.34   | 0.31    | 56.79   |
| Mg K    | 21120 | 256   | 0.606  | 1.000 | 17.70   | 0.20    | 15.63   |
| Al K    | 8914  | 189   | 0.589  | 1.000 | 7.27    | 0.15    | 5.78    |
| Si K    | 27537 | 296   | 0.569  | 1.000 | 21.69   | 0.22    | 16.57   |
| K K     | 6642  | 148   | 0.552  | 1.000 | 5.07    | 0.11    | 2.78    |
| Ca K    | 1038  | 80    | 0.542  | 1.000 | 0.78    | 0.06    | 0.42    |
| Ti K    | 904   | 69    | 0.608  | 1.000 | 0.76    | 0.06    | 0.34    |
| Fe K    | 4669  | 120   | 0.678  | 1.000 | 4.38    | 0.11    | 1.68    |
| Totals  |       |       |        |       | 100.00  |         |         |

Project: Project 1

Owner: INCA

Sample: CHG-4M-MW-No

Type: Default

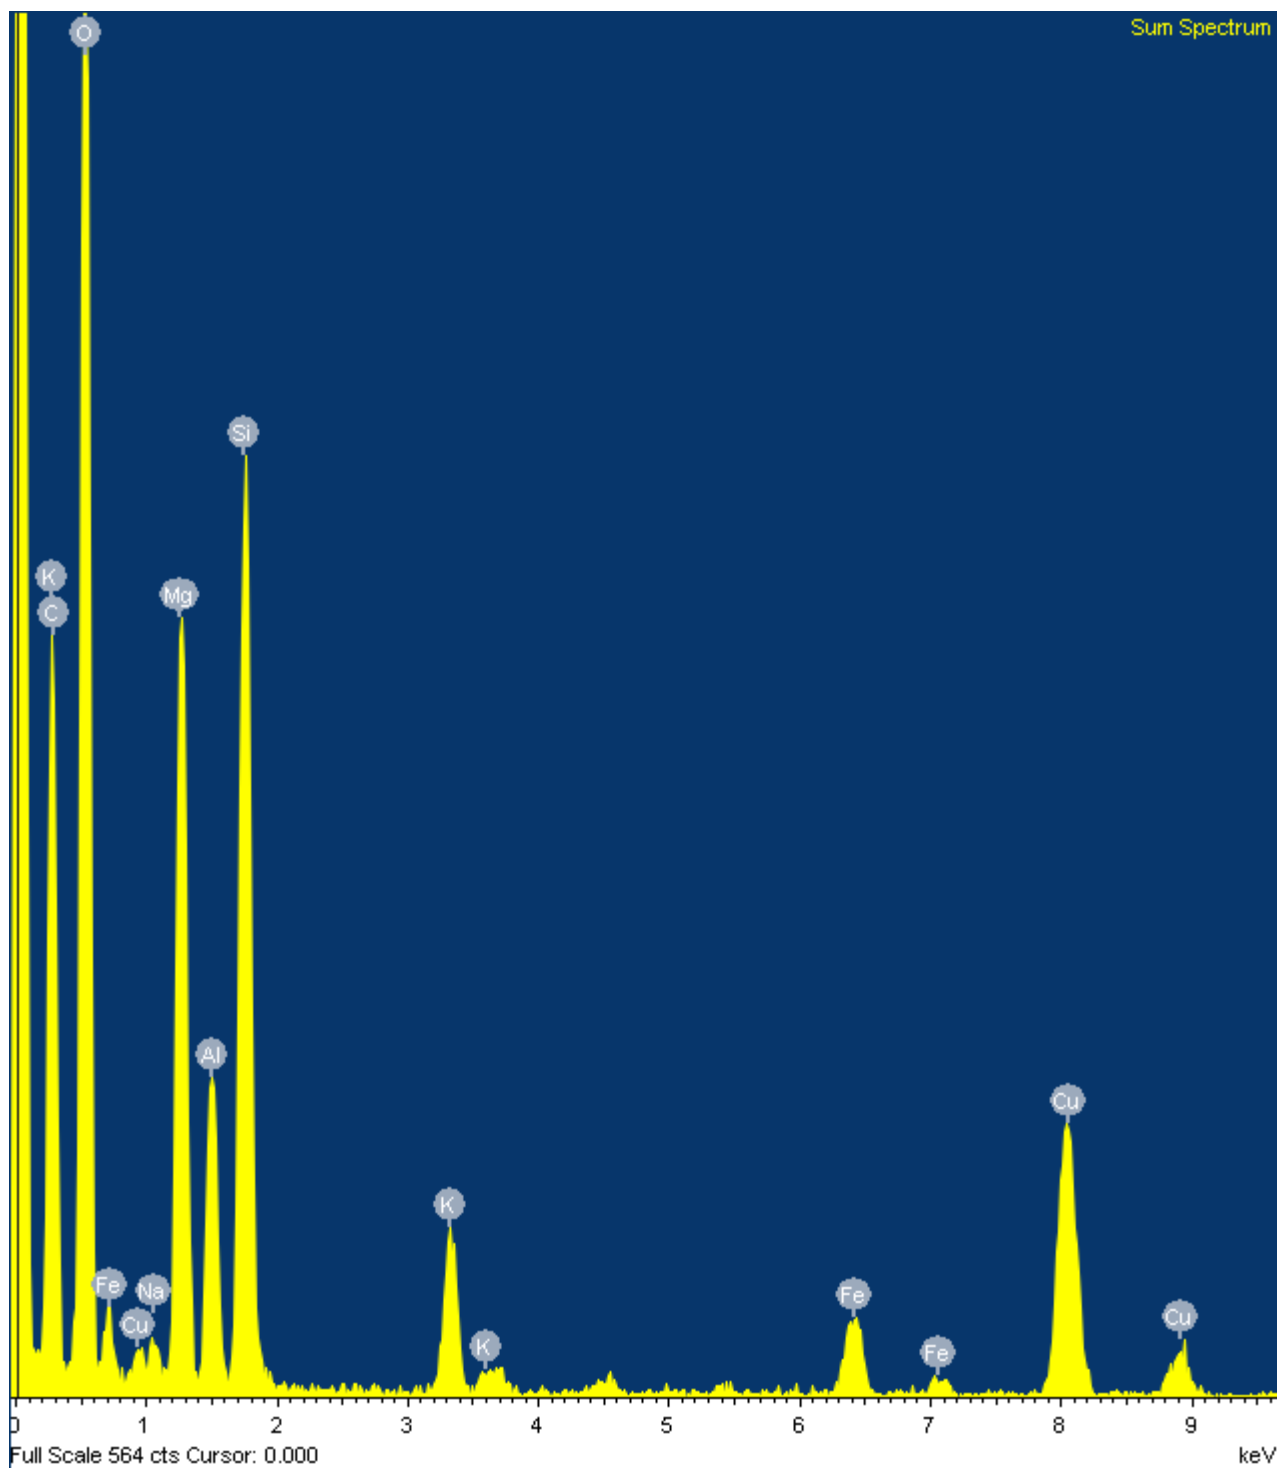

Comment:

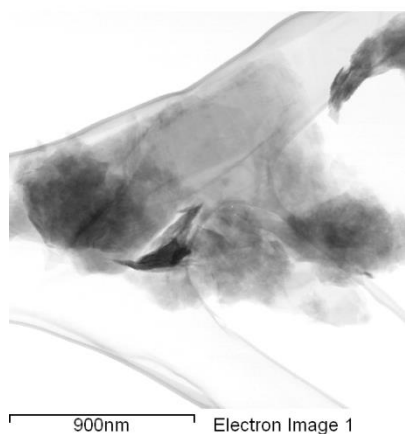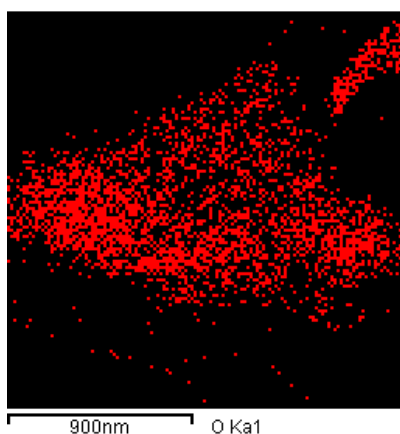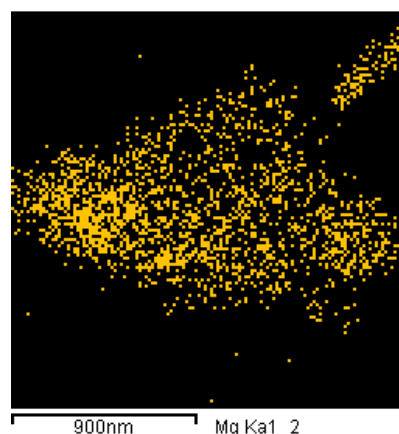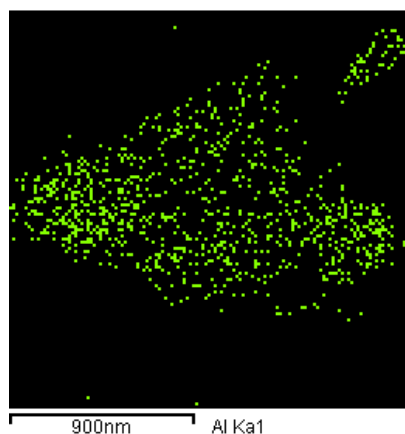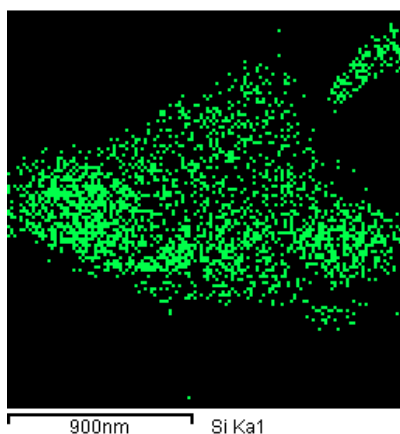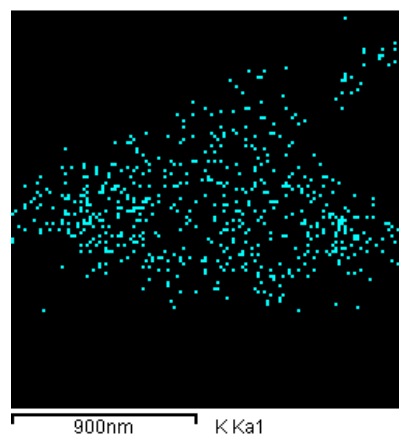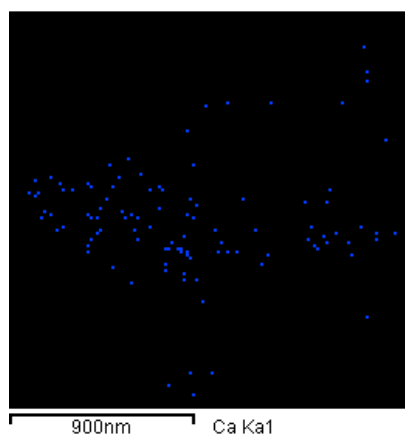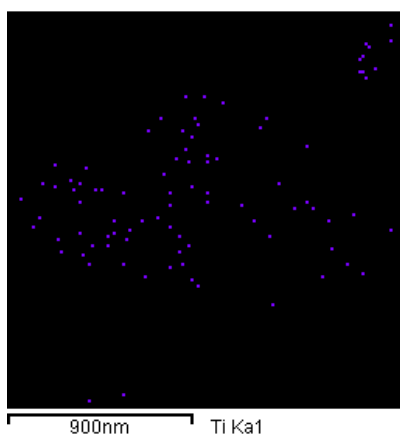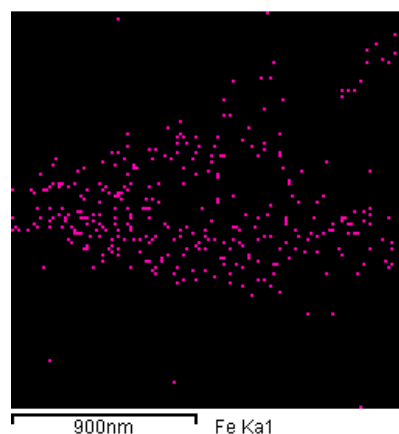

Comment:

Project: Project 1

Owner: INCA

Sample: CHG-4M-MW-No

Type: Default

| Element | Peak | Area  | k      | Abs    | Weight% | Weight% | Atomic% |
|---------|------|-------|--------|--------|---------|---------|---------|
|         | Area | Sigma | factor | Corrn. |         | Sigma   |         |
| O K     | 9875 | 182   | 1.065  | 1.000  | 50.55   | 0.58    | 64.44   |
| Mg K    | 5413 | 129   | 0.606  | 1.000  | 15.76   | 0.36    | 13.22   |
| Al K    | 2206 | 94    | 0.589  | 1.000  | 6.25    | 0.26    | 4.72    |
| Si K    | 6912 | 149   | 0.569  | 1.000  | 18.91   | 0.39    | 13.73   |
| K K     | 1626 | 75    | 0.552  | 1.000  | 4.31    | 0.20    | 2.25    |
| Ca K    | 202  | 38    | 0.542  | 1.000  | 0.53    | 0.10    | 0.27    |
| Ti K    | 137  | 33    | 0.608  | 1.000  | 0.40    | 0.10    | 0.17    |
| Fe K    | 1009 | 57    | 0.678  | 1.000  | 3.29    | 0.18    | 1.20    |
| Totals  |      |       |        |        | 100.00  |         |         |

Project: Project 1

Owner: INCA

Sample: CHG-4M-MW-No

Type: Default

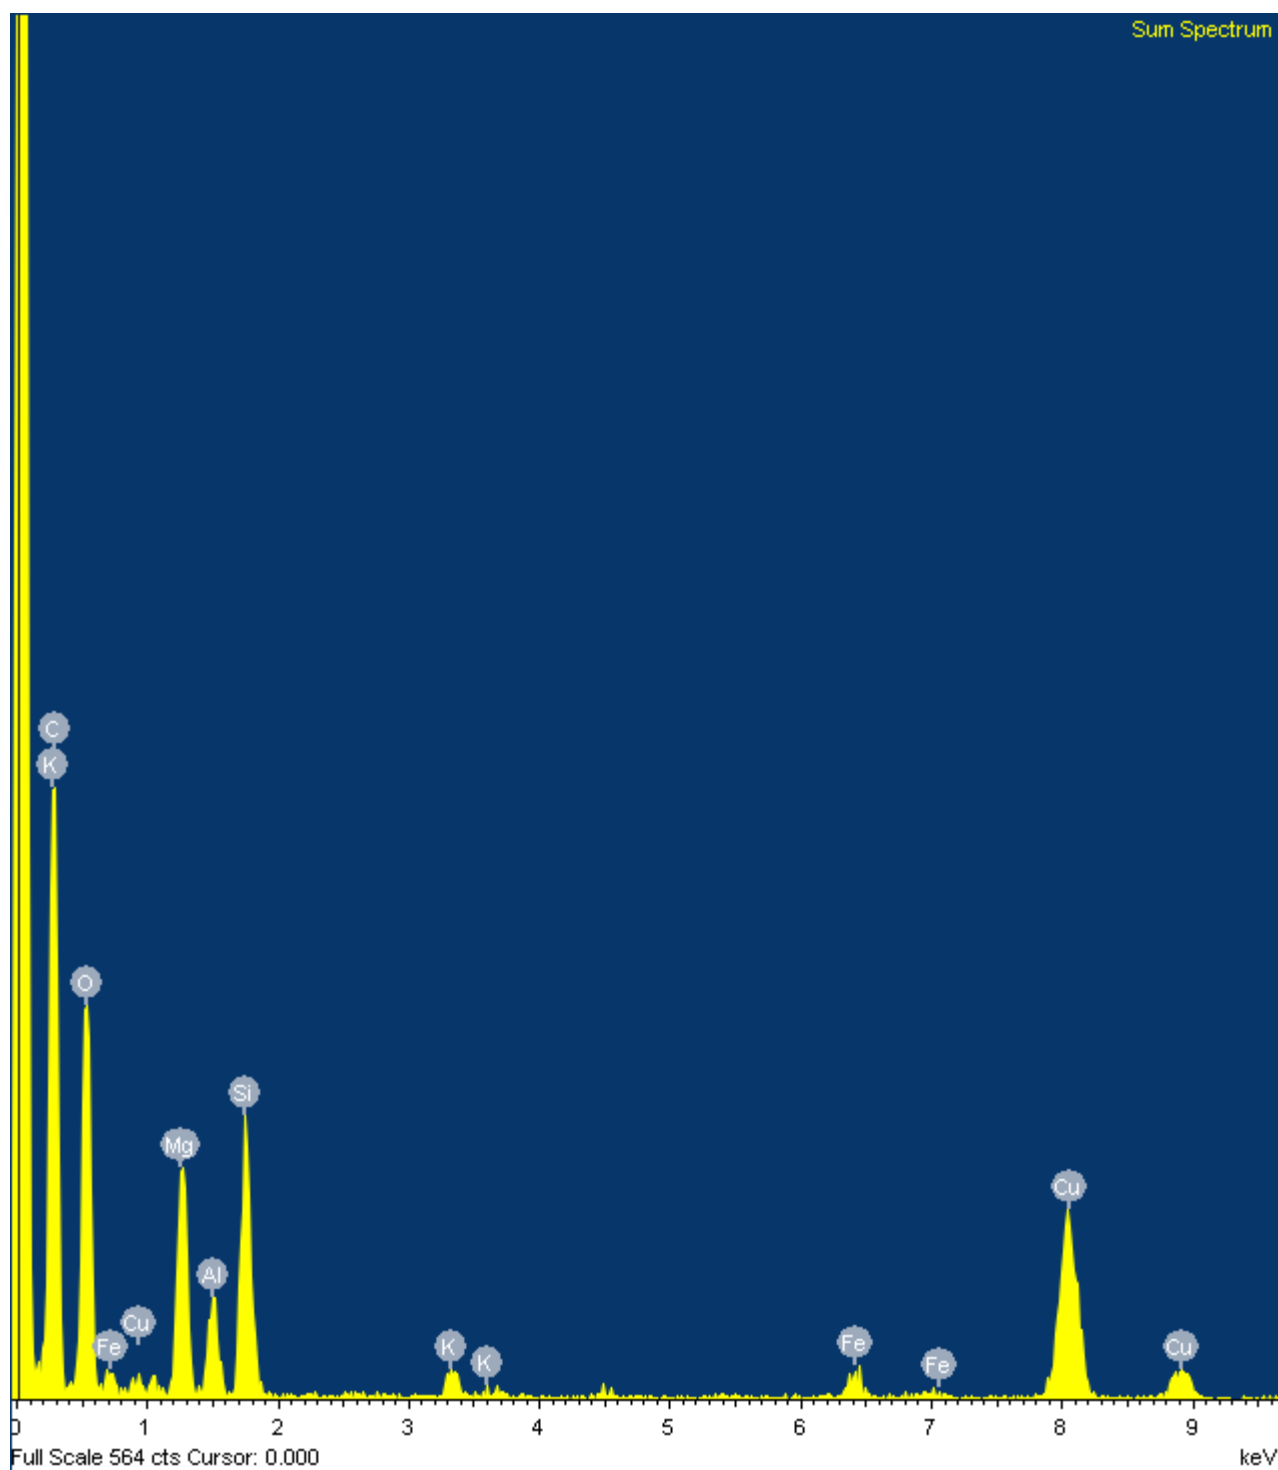

Comment:

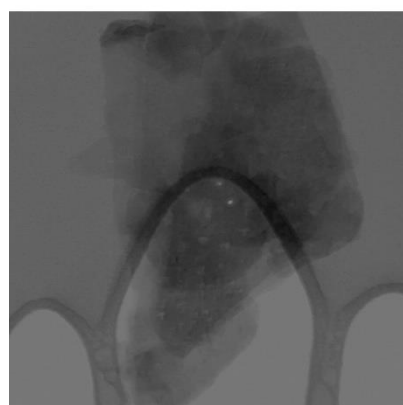

100nm

Electron Image 1

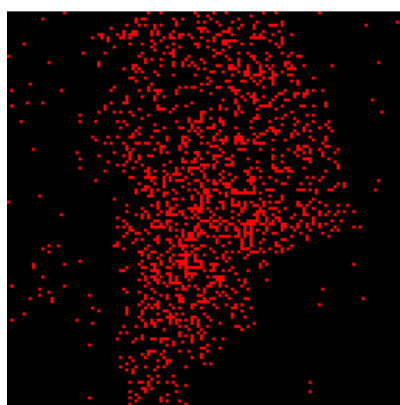

100nm

O Ka1

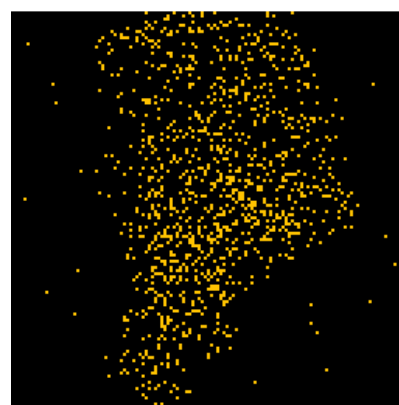

100nm

Mg Ka1\_2

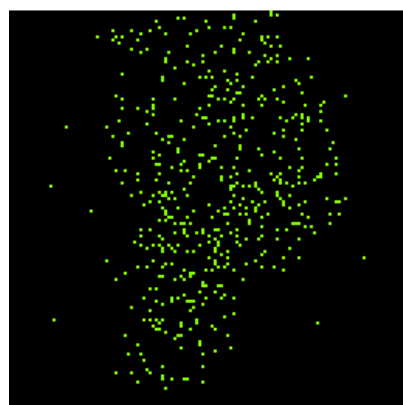

100nm

Al Ka1

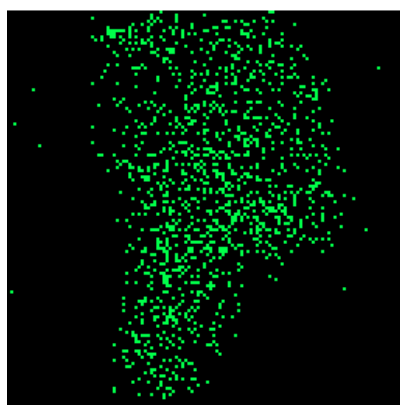

100nm

Si Ka1

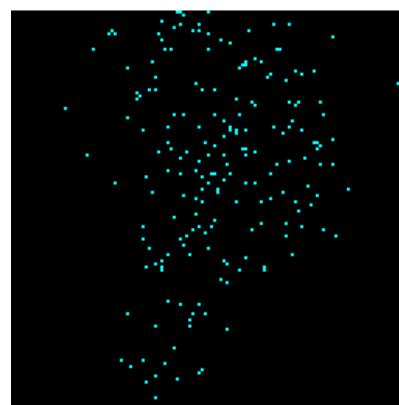

100nm

K Ka1

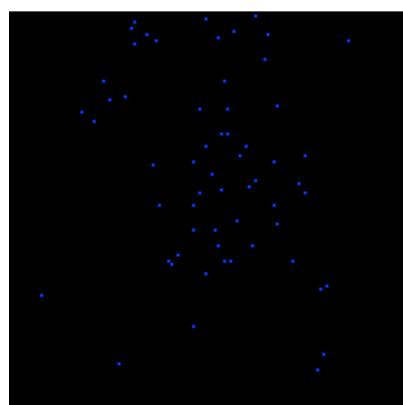

100nm

Ca Ka1

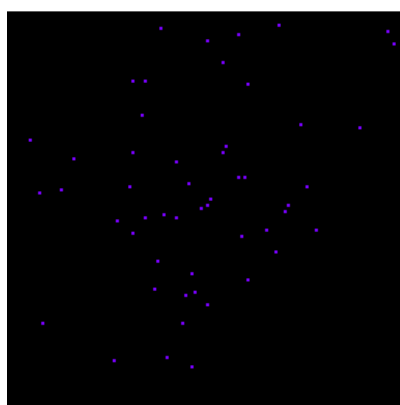

100nm

Ti Ka1

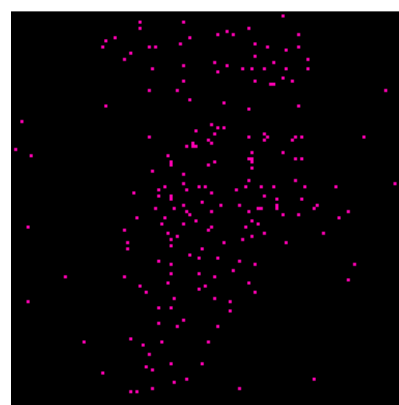

100nm

Fe Ka1

Comment:



Project: Project 1

Owner: INCA

Sample: CHG-4M-MW-No

Type: Default

| Element | Peak | Area  | k      | Abs    | Weight% | Weight% | Atomic% |
|---------|------|-------|--------|--------|---------|---------|---------|
|         | Area | Sigma | factor | Corrn. |         | Sigma   |         |
| O K     | 2614 | 95    | 1.065  | 1.000  | 51.32   | 1.15    | 64.87   |
| Mg K    | 1520 | 69    | 0.606  | 1.000  | 16.98   | 0.74    | 14.12   |
| Al K    | 569  | 50    | 0.589  | 1.000  | 6.19    | 0.53    | 4.64    |
| Si K    | 1759 | 75    | 0.569  | 1.000  | 18.45   | 0.76    | 13.29   |
| K K     | 263  | 33    | 0.552  | 1.000  | 2.67    | 0.33    | 1.38    |
| Ca K    | 55   | 21    | 0.542  | 1.000  | 0.55    | 0.21    | 0.28    |
| Ti K    | 53   | 19    | 0.608  | 1.000  | 0.60    | 0.21    | 0.25    |
| Fe K    | 260  | 32    | 0.678  | 1.000  | 3.25    | 0.39    | 1.18    |
| Totals  |      |       |        |        | 100.00  |         |         |

Project: Project 1

Owner: INCA

Sample: CHG-4M-MW-No

Type: Default

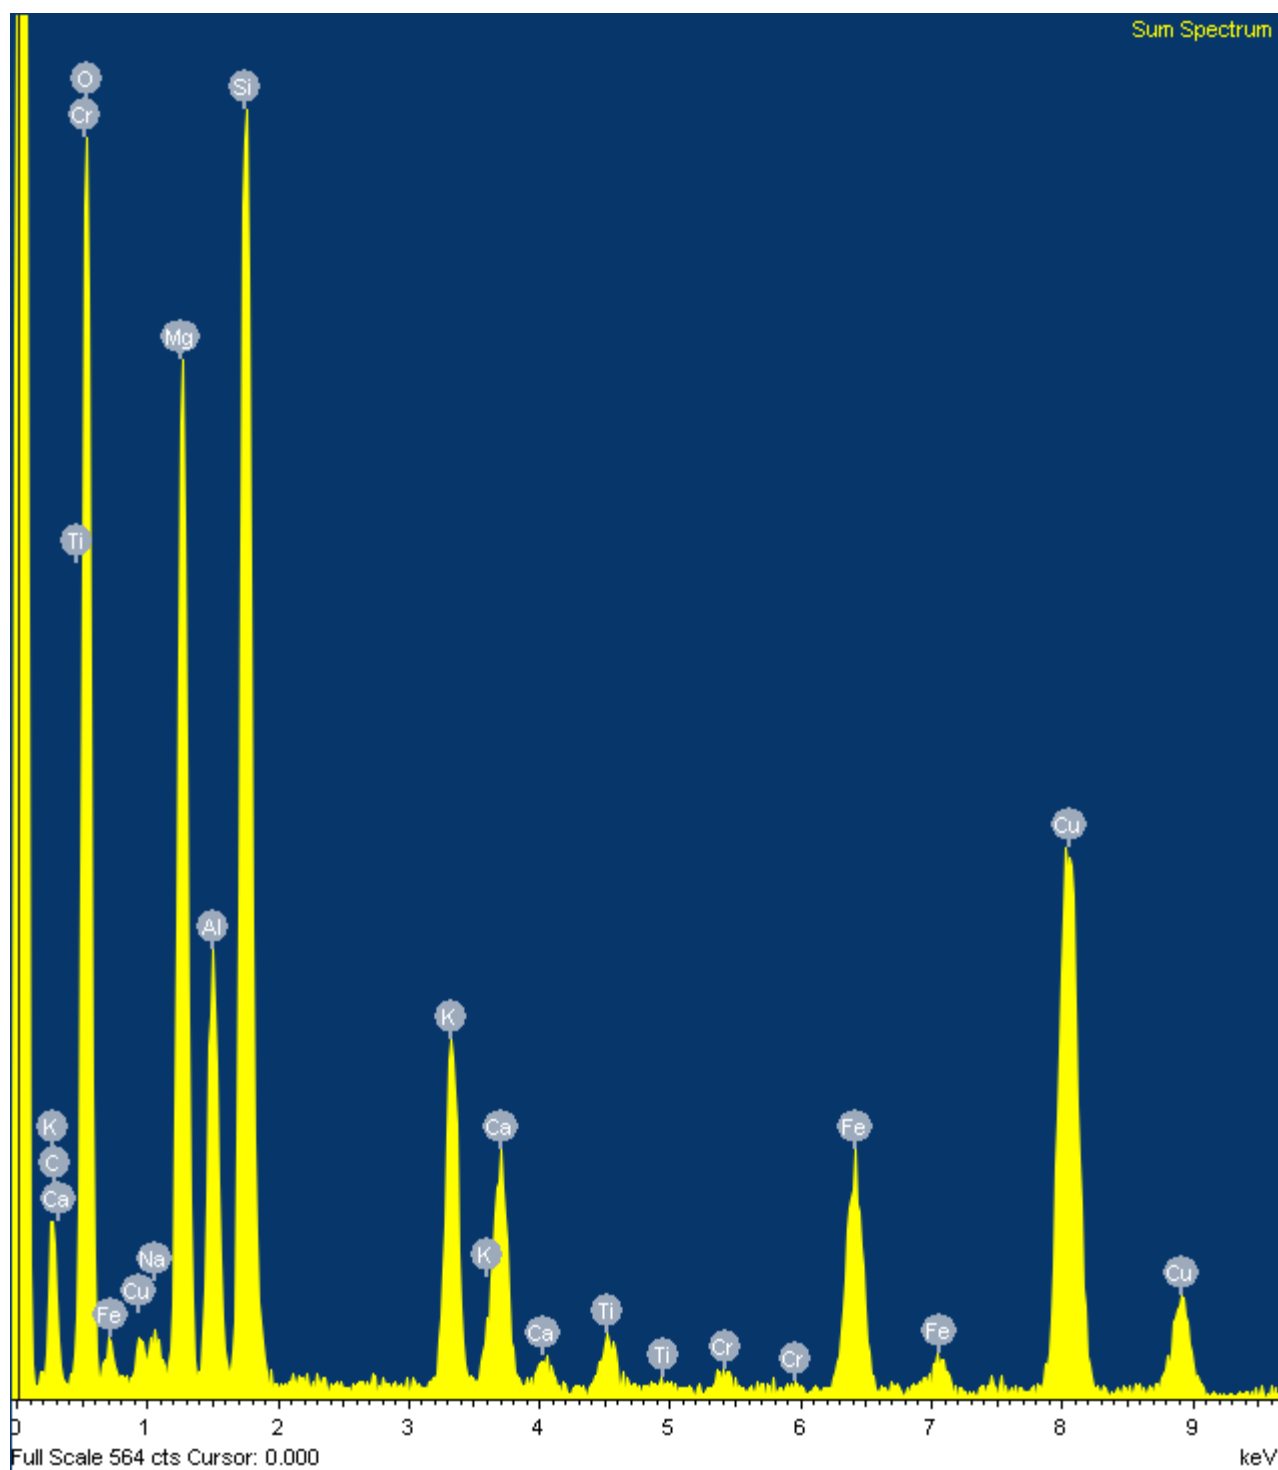

Comment:

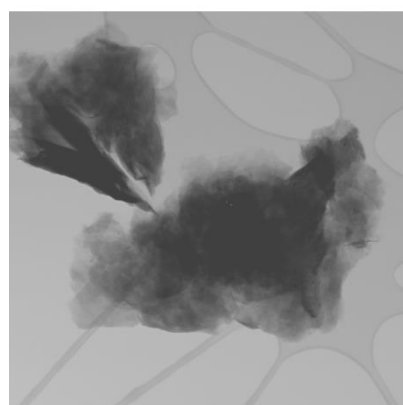

Electron Image 1

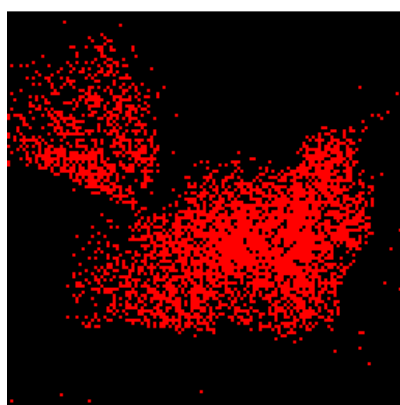

O Ka1

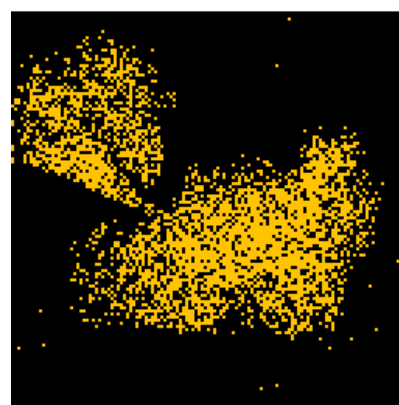

Mg Ka1\_2

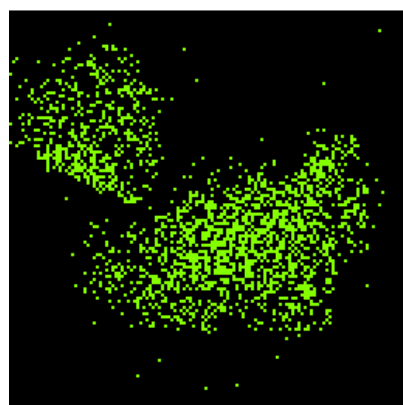

Al Ka1

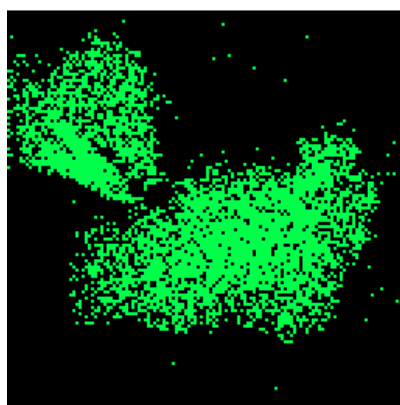

Si Ka1

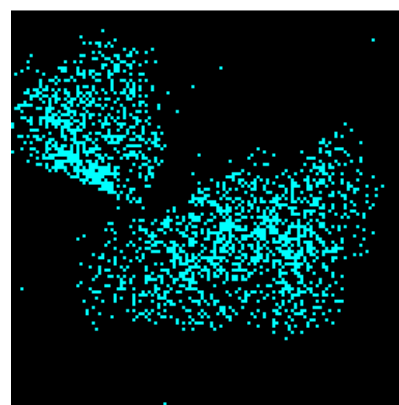

K Ka1

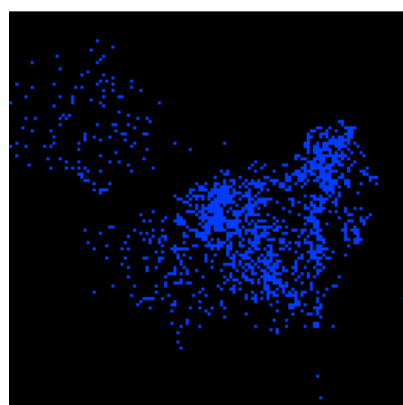

Ca Ka1

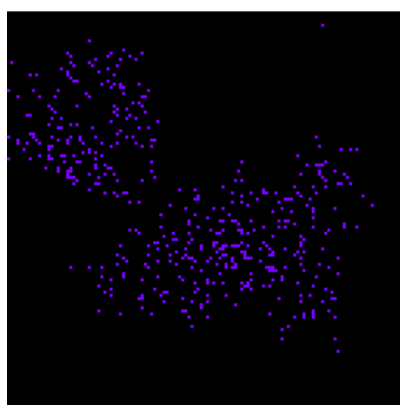

Ti Ka1

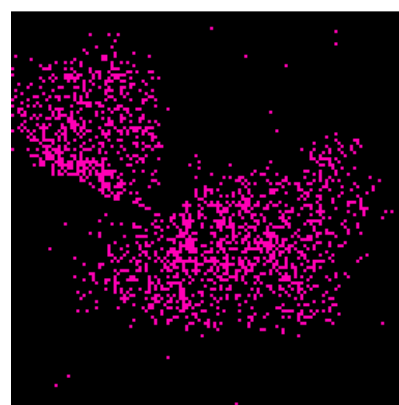

Fe Ka1

Comment:

Project: Project 1

Owner: INCA

Sample: CHG-4M-MW-No

Type: Default

| Element | Peak | Area  | k      | Abs    | Weight% | Weight% | Atomic% |
|---------|------|-------|--------|--------|---------|---------|---------|
|         | Area | Sigma | factor | Corrn. |         | Sigma   |         |
| O K     | 7330 | 160   | 1.065  | 1.000  | 32.06   | 0.53    | 47.29   |
| Mg K    | 6637 | 143   | 0.606  | 1.000  | 16.51   | 0.34    | 16.02   |
| Al K    | 2846 | 107   | 0.589  | 1.000  | 6.89    | 0.25    | 6.02    |
| Si K    | 9718 | 175   | 0.569  | 1.000  | 22.72   | 0.38    | 19.08   |
| K K     | 3522 | 109   | 0.552  | 1.000  | 7.99    | 0.24    | 4.82    |
| Ca K    | 2246 | 93    | 0.542  | 1.000  | 5.00    | 0.20    | 2.95    |
| Ti K    | 482  | 54    | 0.608  | 1.000  | 1.20    | 0.13    | 0.59    |
| Fe K    | 2741 | 95    | 0.678  | 1.000  | 7.63    | 0.26    | 3.22    |
| Totals  |      |       |        |        | 100.00  |         |         |
