# Supplementary material for: Heterogeneous Distribution of Interlayer Cations and Iron as a Plausible Explanation of the Non-Exfoliation of Commercial Vermiculites Post Alcohol Treatment and Microwave Irradiation
Source: MDPI journal article supplement (doi:10.3390/min11080835), 2021-08-01
Supplement: s1 [file s1]

Project: Project 1

Owner: INCA

Sample: CHG-4E-MW-No

Type: Default

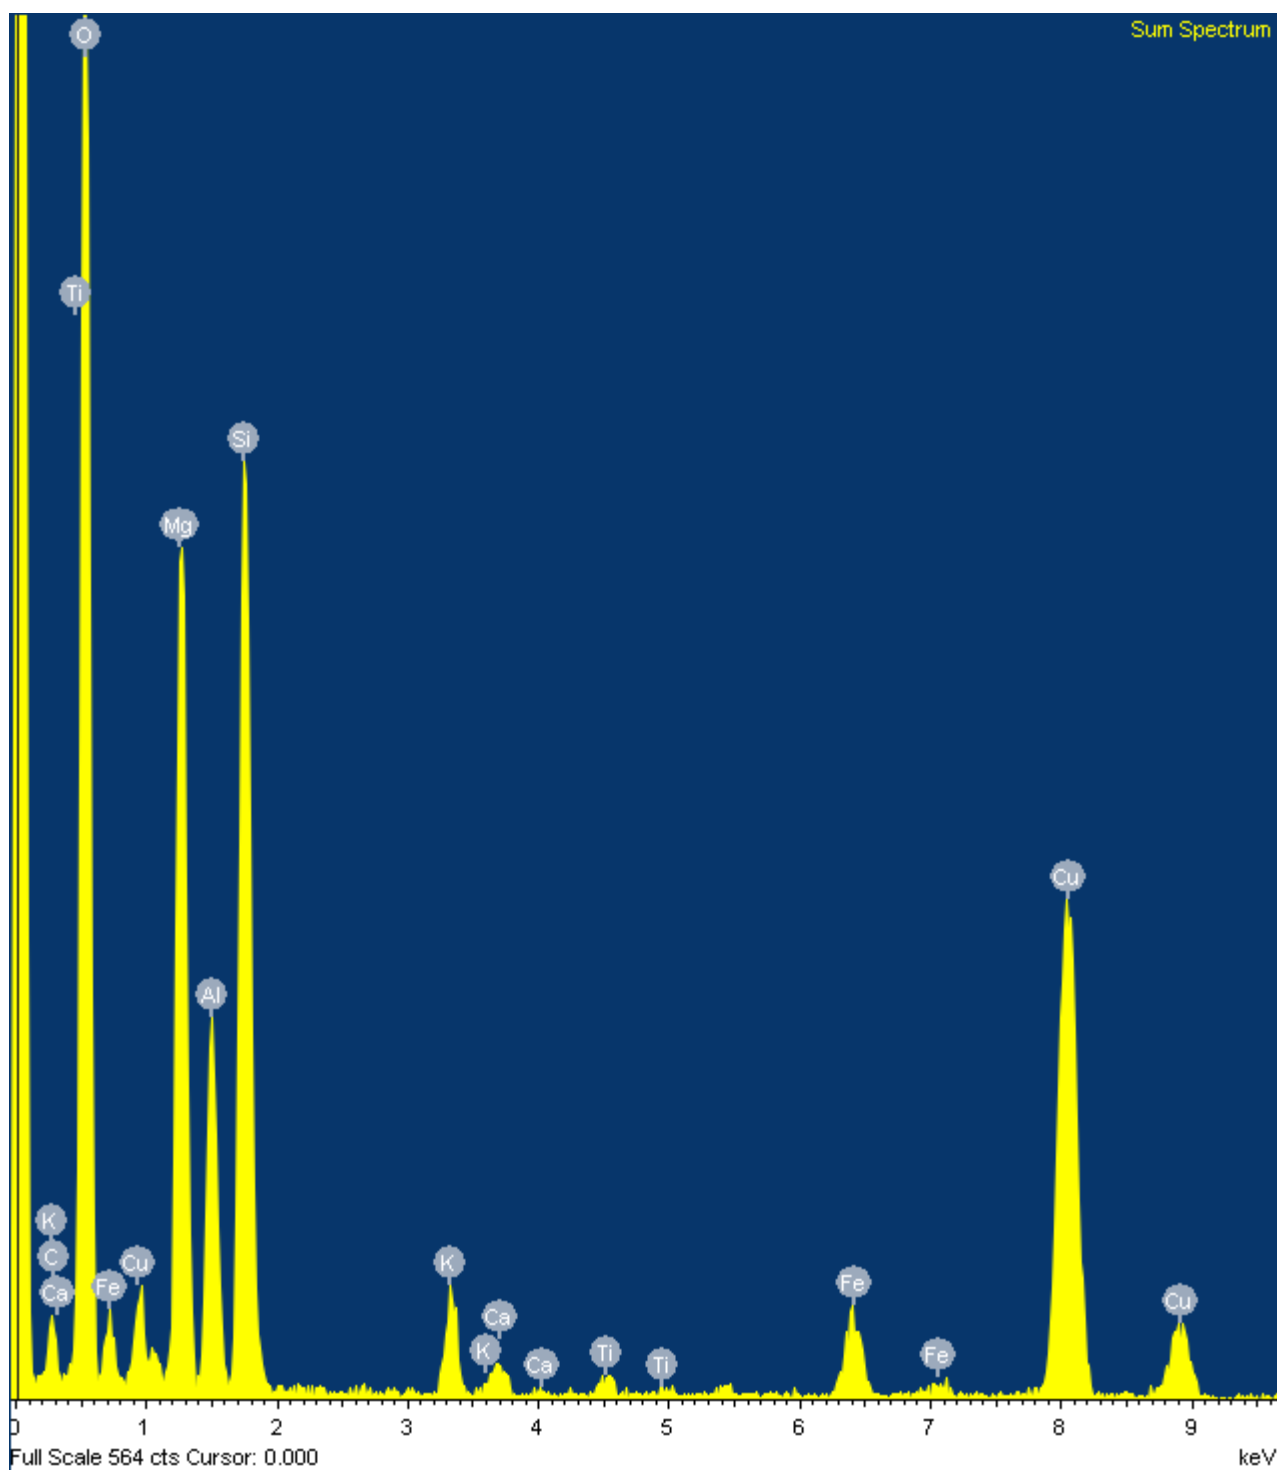

Comment:

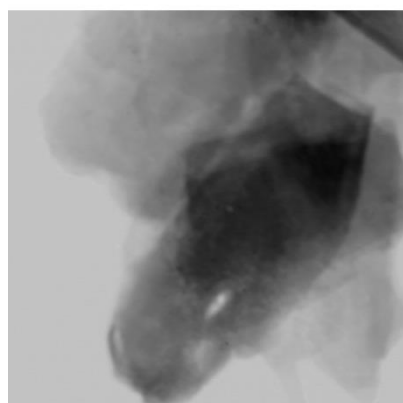

300nm Electron Image 1

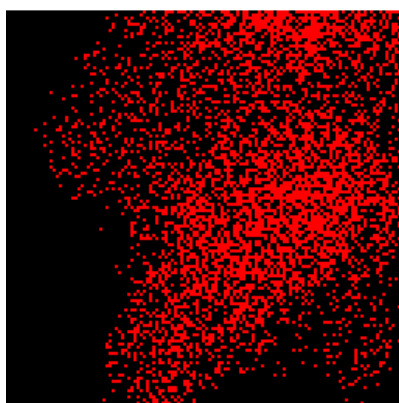

300nm O Ka1

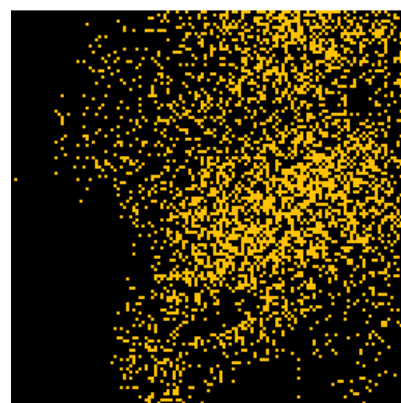

300nm Mg Ka1\_2

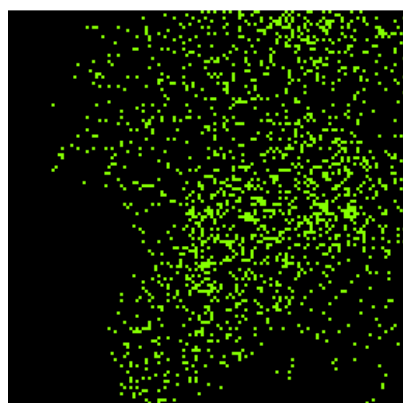

300nm Al Ka1

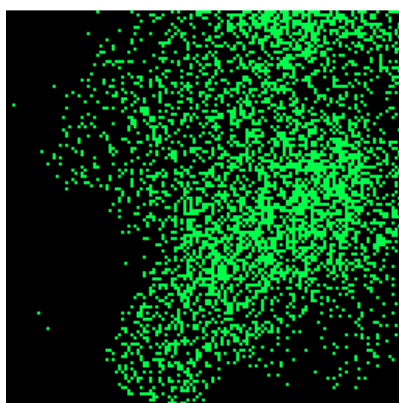

300nm Si Ka1

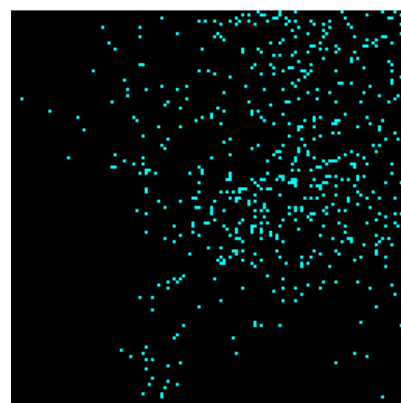

300nm K Ka1

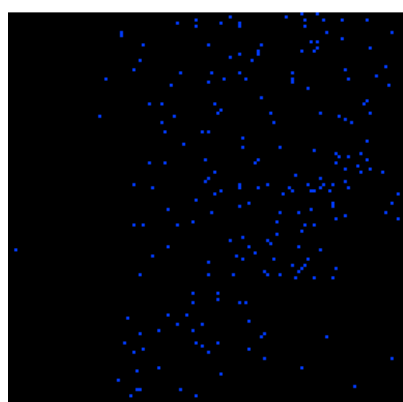

300nm Ca Ka1

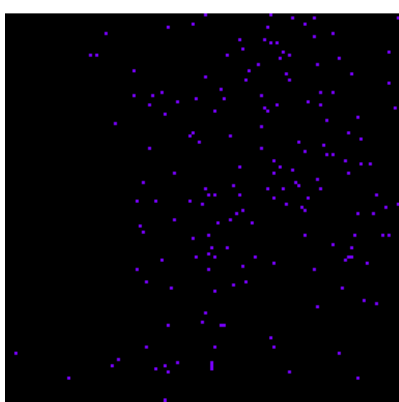

300nm Ti Ka1

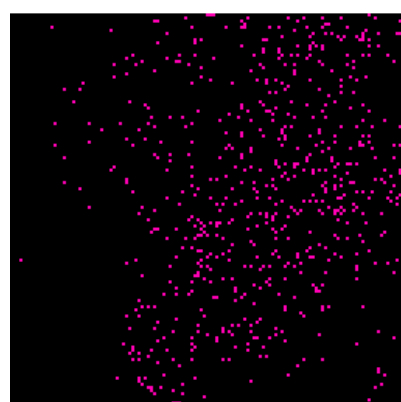

300nm Fe Ka1

Comment:

Project: Project 1

Owner: INCA

Sample: CHG-4E-MW-No

Type: Default

| Element | Peak | Area  | k      | Abs    | Weight% | Weight% | Atomic% |
|---------|------|-------|--------|--------|---------|---------|---------|
|         | Area | Sigma | factor | Corrn. |         | Sigma   |         |
| O K     | 8912 | 174   | 1.065  | 1.000  | 47.90   | 0.60    | 61.70   |
| Mg K    | 5738 | 134   | 0.606  | 1.000  | 17.54   | 0.39    | 14.87   |
| Al K    | 2375 | 97    | 0.589  | 1.000  | 7.07    | 0.28    | 5.40    |
| Si K    | 6985 | 148   | 0.569  | 1.000  | 20.06   | 0.41    | 14.72   |
| K K     | 946  | 57    | 0.552  | 1.000  | 2.63    | 0.16    | 1.39    |
| Ca K    | 293  | 38    | 0.542  | 1.000  | 0.80    | 0.10    | 0.41    |
| Ti K    | 228  | 34    | 0.608  | 1.000  | 0.70    | 0.10    | 0.30    |
| Fe K    | 965  | 58    | 0.678  | 1.000  | 3.30    | 0.20    | 1.22    |
| Totals  |      |       |        |        | 100.00  |         |         |

Project: Project 1

Owner: INCA

Sample: CHG-4E-MW-No

Type: Default

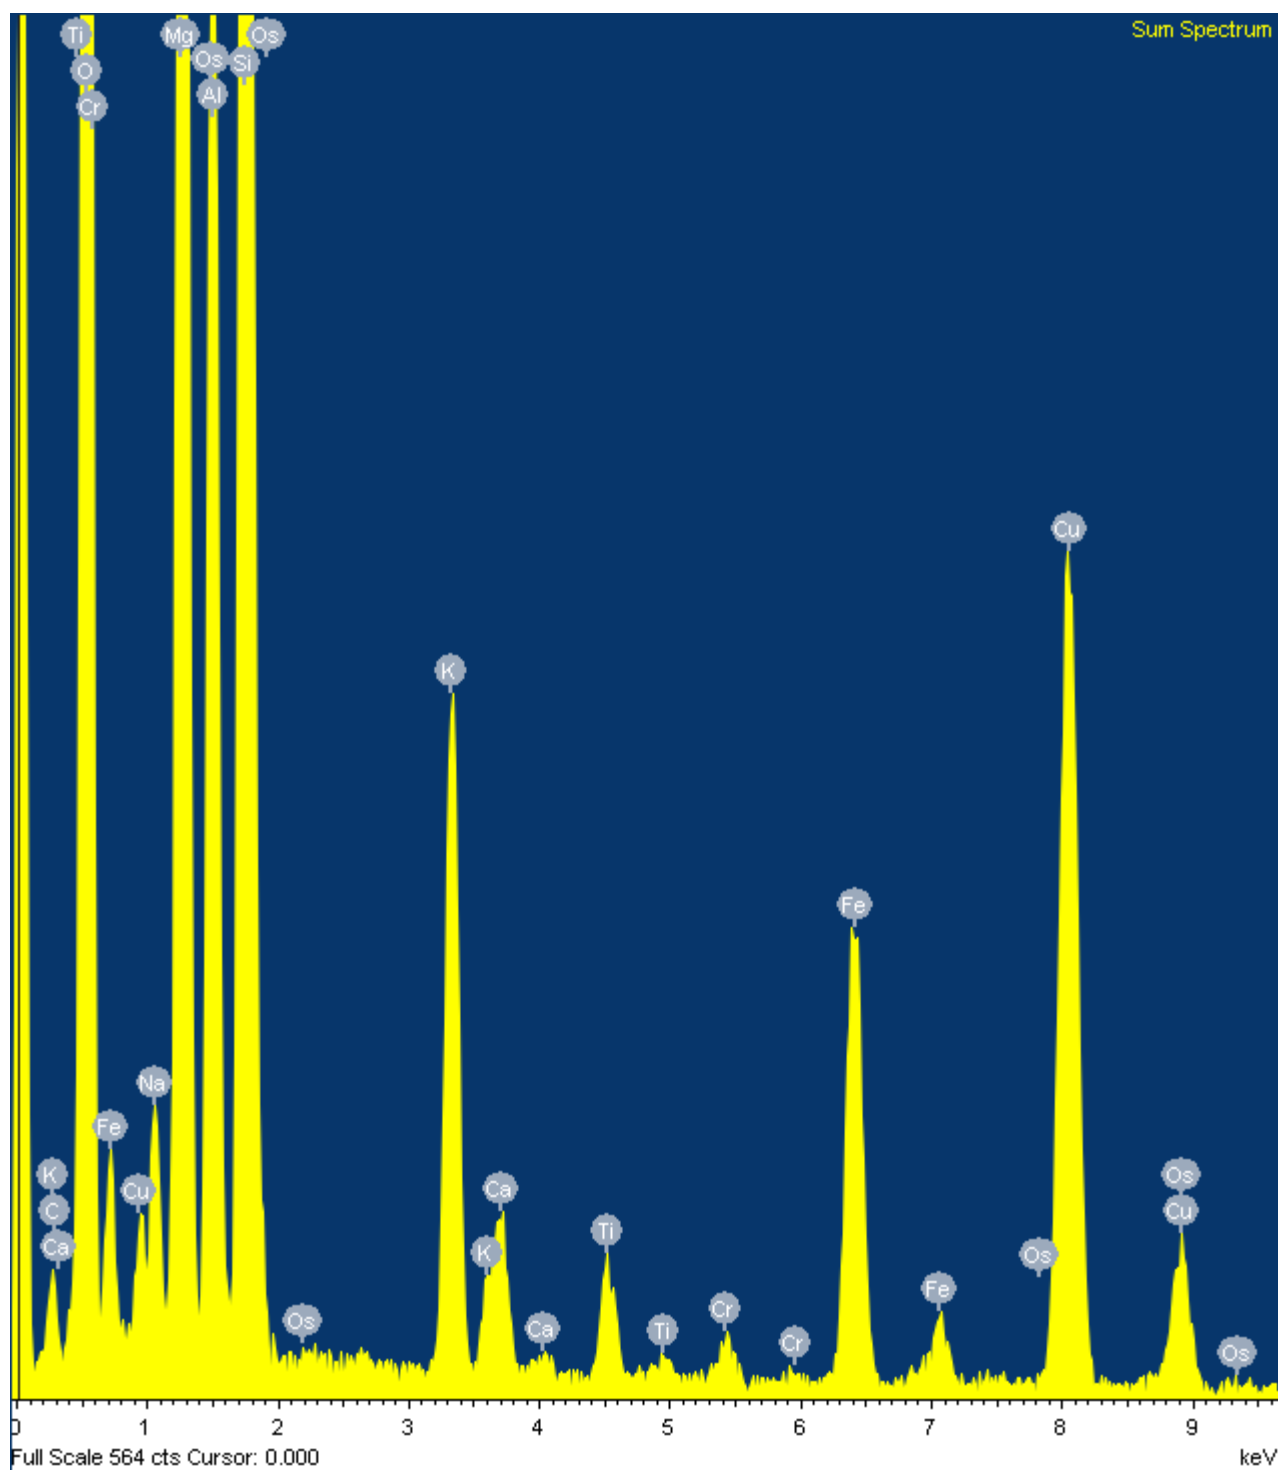

Comment:

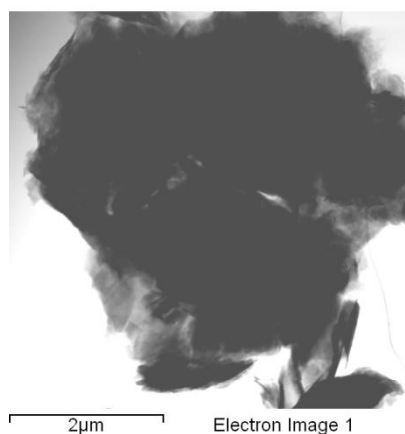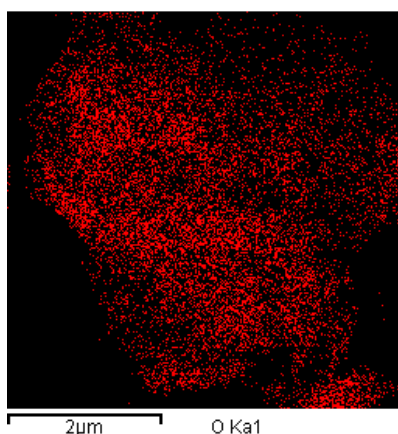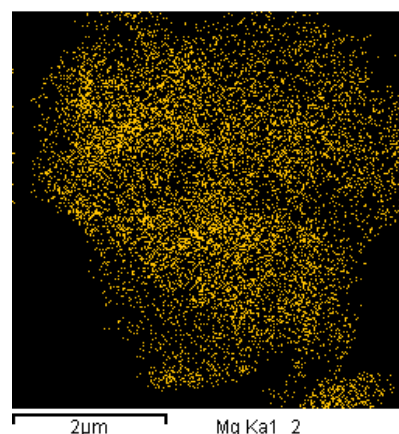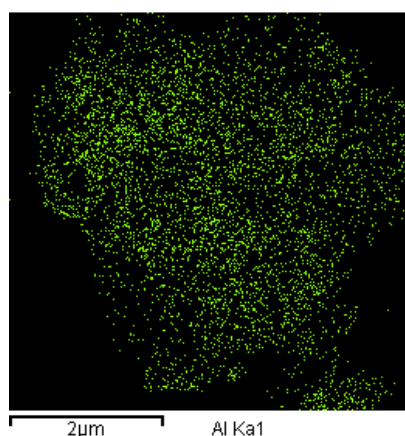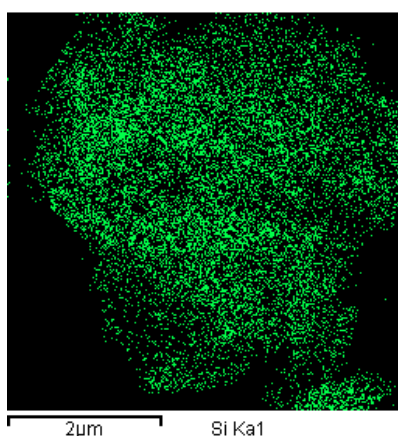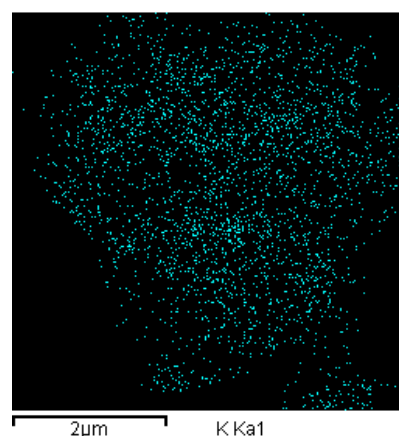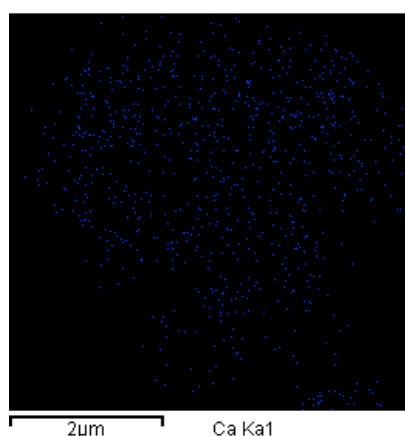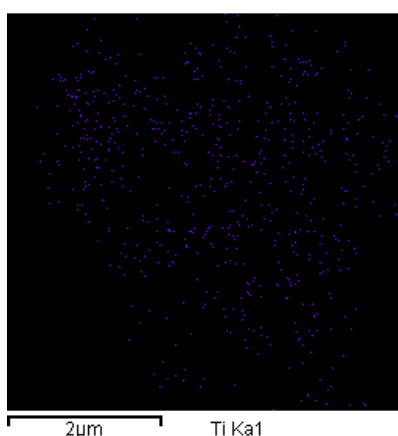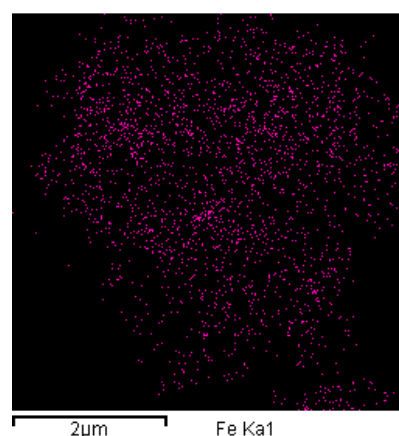

Comment:

Project: Project 1

Owner: INCA

Sample: CHG-4E-MW-No

Type: Default

| Element | Peak  | Area  | k      | Abs   | Weight% | Weight% | Atomic% |
|---------|-------|-------|--------|-------|---------|---------|---------|
|         | Area  | Sigma | factor | Corn. |         | Sigma   |         |
| O K     | 32276 | 328   | 1.065  | 1.000 | 40.90   | 0.29    | 55.41   |
| Mg K    | 24403 | 276   | 0.606  | 1.000 | 17.59   | 0.19    | 15.68   |
| Al K    | 10749 | 207   | 0.589  | 1.000 | 7.54    | 0.14    | 6.06    |
| Si K    | 33401 | 325   | 0.569  | 1.000 | 22.62   | 0.21    | 17.46   |
| K K     | 7137  | 156   | 0.552  | 1.000 | 4.69    | 0.10    | 2.60    |
| Ca K    | 1537  | 95    | 0.542  | 1.000 | 0.99    | 0.06    | 0.54    |
| Ti K    | 1229  | 79    | 0.608  | 1.000 | 0.89    | 0.06    | 0.40    |
| Fe K    | 5924  | 135   | 0.678  | 1.000 | 4.78    | 0.11    | 1.85    |
| Totals  |       |       |        |       | 100.00  |         |         |

Project: Project 1

Owner: INCA

Sample: CHG-4E-MW-No

Type: Default

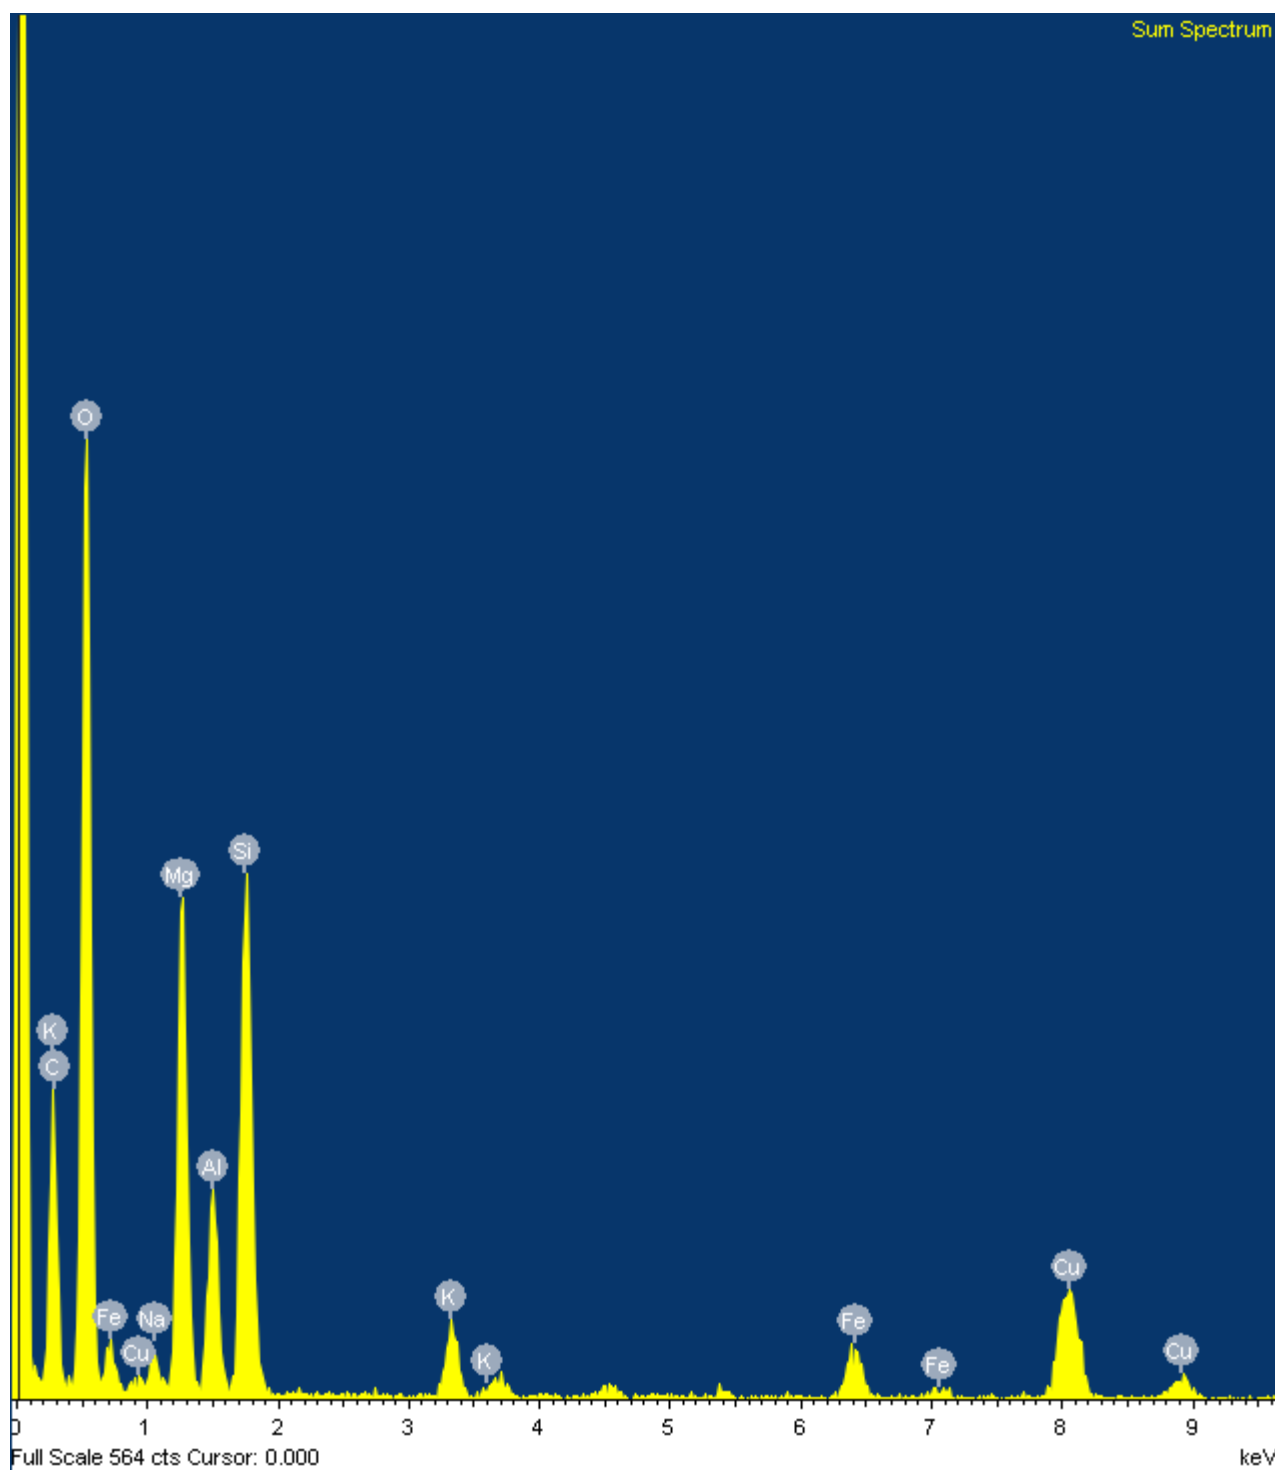

Comment:

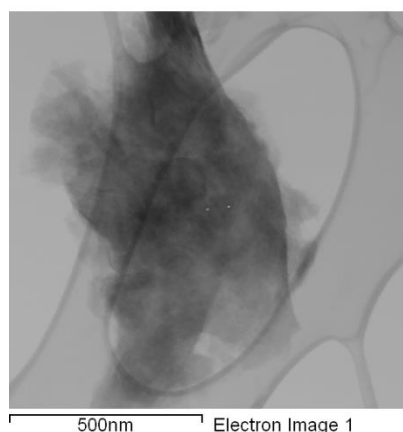

500nm

Electron Image 1

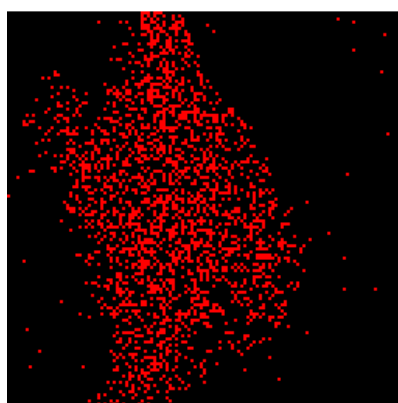

500nm

O Ka1

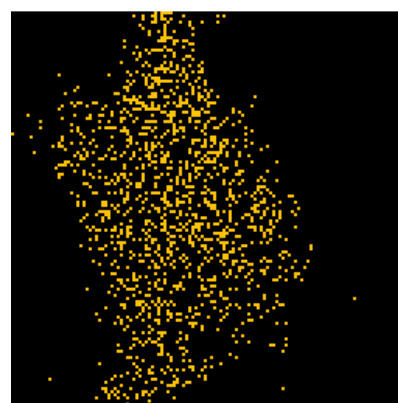

500nm

Mg Ka1\_2

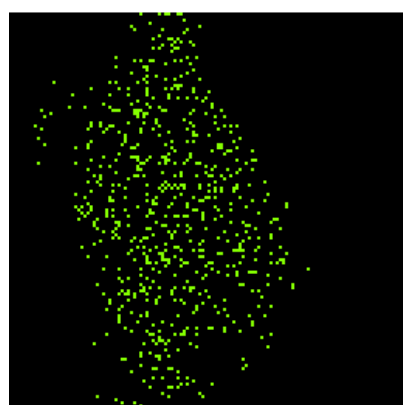

500nm

Al Ka1

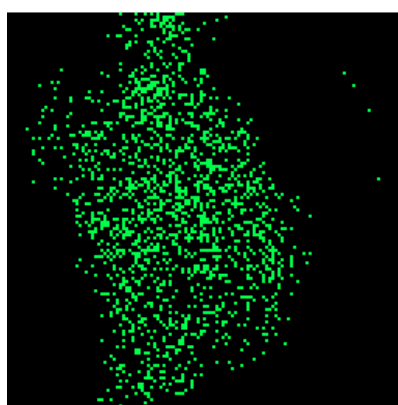

500nm

Si Ka1

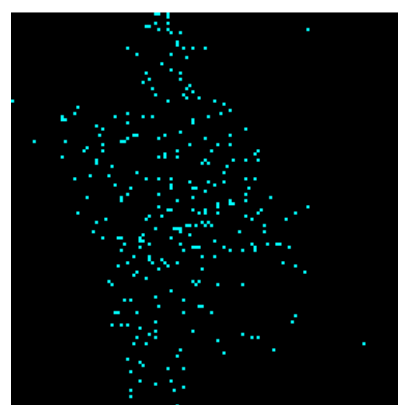

500nm

K Ka1

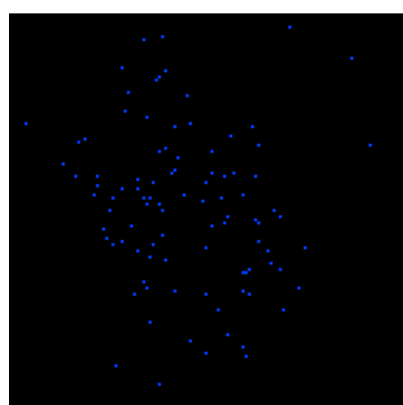

500nm

Ca Ka1

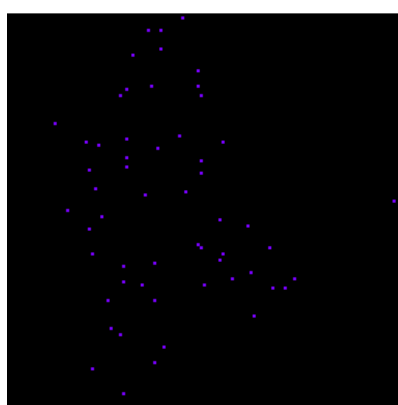

500nm

Ti Ka1

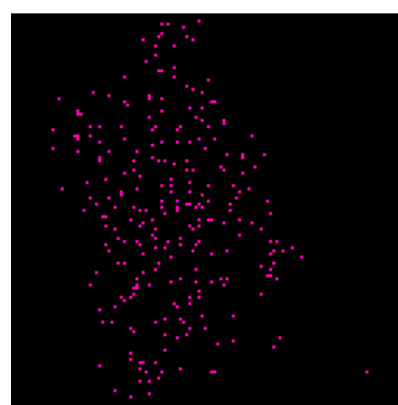

500nm

Fe Ka1

Comment:



Project: Project 1

Owner: INCA

Sample: CHG-4E-MW-No

Type: Default

| Element | Peak | Area  | k      | Abs    | Weight% | Weight% | Atomic% |
|---------|------|-------|--------|--------|---------|---------|---------|
|         | Area | Sigma | factor | Corrn. |         | Sigma   |         |
| O K     | 5502 | 137   | 1.065  | 1.000  | 51.30   | 0.78    | 64.97   |
| Mg K    | 3061 | 98    | 0.606  | 1.000  | 16.23   | 0.50    | 13.53   |
| Al K    | 1274 | 72    | 0.589  | 1.000  | 6.57    | 0.36    | 4.94    |
| Si K    | 3651 | 109   | 0.569  | 1.000  | 18.19   | 0.52    | 13.13   |
| K K     | 650  | 47    | 0.552  | 1.000  | 3.14    | 0.23    | 1.63    |
| Ca K    | 176  | 30    | 0.542  | 1.000  | 0.84    | 0.14    | 0.42    |
| Ti K    | 103  | 25    | 0.608  | 1.000  | 0.55    | 0.13    | 0.23    |
| Fe K    | 536  | 42    | 0.678  | 1.000  | 3.18    | 0.24    | 1.15    |
| Totals  |      |       |        |        | 100.00  |         |         |

Project: Project 1

Owner: INCA

Sample: CHG-4E-MW-No

Type: Default

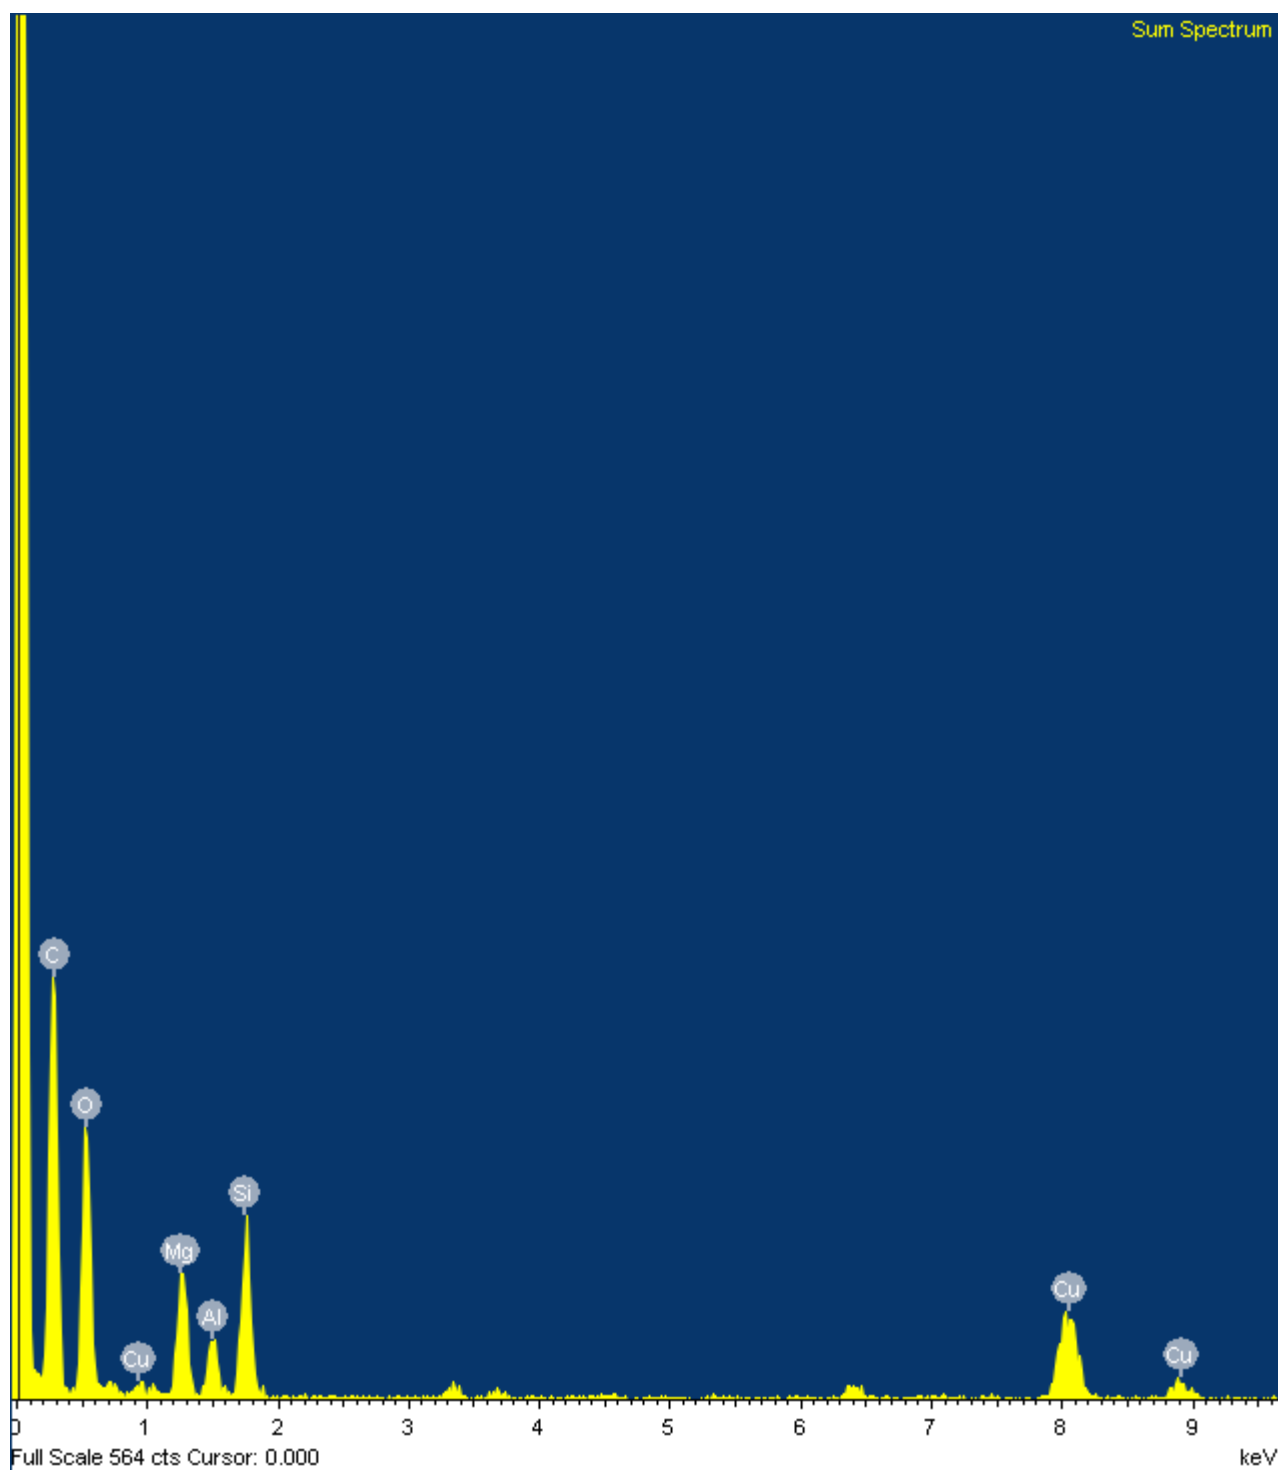

Comment:

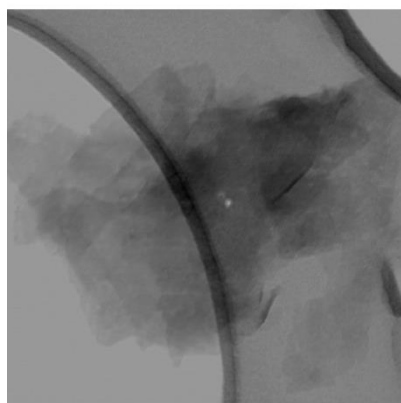

100nm

Electron Image 1

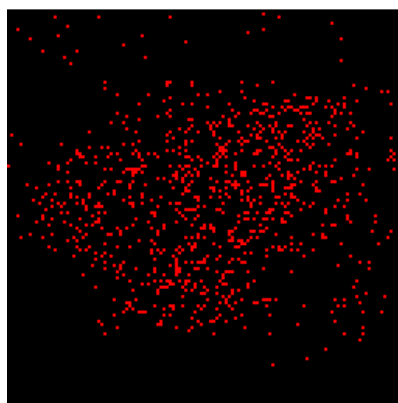

100nm

O Ka1

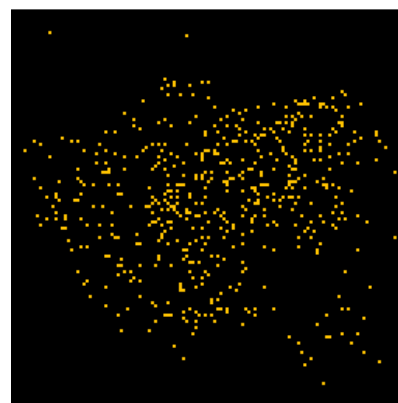

100nm

Mg Ka1\_2

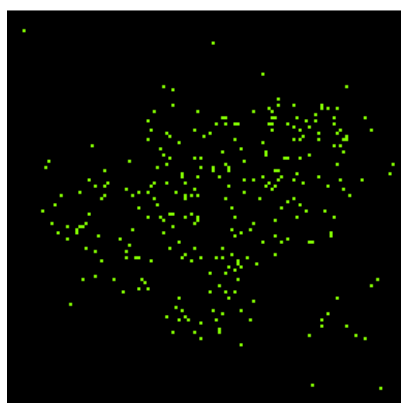

100nm

Al Ka1

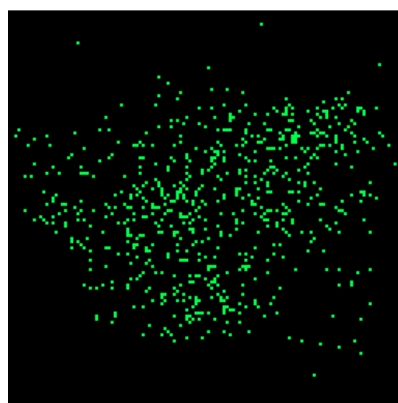

100nm

Si Ka1

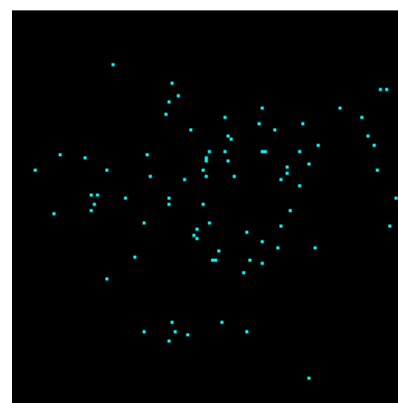

100nm

K Ka1

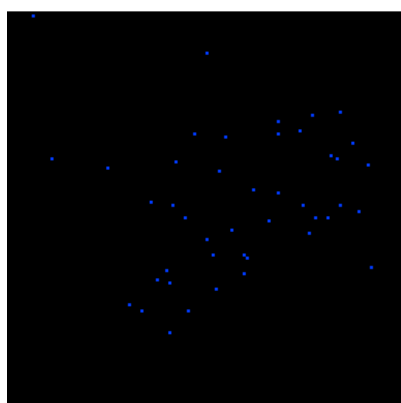

100nm

Ca Ka1

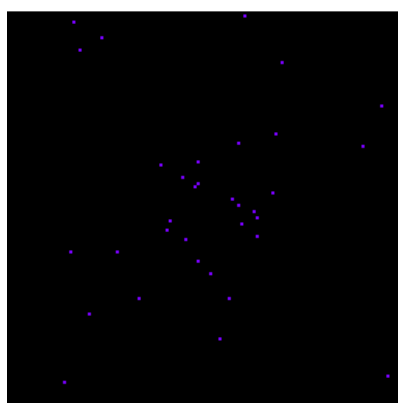

100nm

Ti Ka1

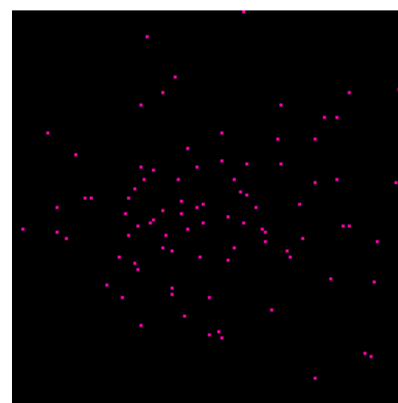

100nm

Fe Ka1

Comment:

Project: Project 1

Owner: INCA

Sample: CHG-4E-MW-No

Type: Default

| Element | Peak | Area  | k      | Abs    | Weight% | Weight% | Atomic% |
|---------|------|-------|--------|--------|---------|---------|---------|
|         | Area | Sigma | factor | Corrn. |         | Sigma   |         |
| O K     | 1817 | 79    | 1.065  | 1.000  | 55.40   | 1.39    | 68.55   |
| Mg K    | 822  | 51    | 0.606  | 1.000  | 14.26   | 0.86    | 11.61   |
| Al K    | 381  | 39    | 0.589  | 1.000  | 6.43    | 0.64    | 4.71    |
| Si K    | 1088 | 58    | 0.569  | 1.000  | 17.72   | 0.91    | 12.49   |
| K K     | 118  | 23    | 0.552  | 1.000  | 1.87    | 0.35    | 0.95    |
| Ca K    | 59   | 17    | 0.542  | 1.000  | 0.91    | 0.27    | 0.45    |
| Ti K    | 30   | 16    | 0.608  | 1.000  | 0.53    | 0.28    | 0.22    |
| Fe K    | 149  | 22    | 0.678  | 1.000  | 2.88    | 0.43    | 1.02    |
| Totals  |      |       |        |        | 100.00  |         |         |

Project: Project 1

Owner: INCA

Sample: CHG-4E-MW-No

Type: Default

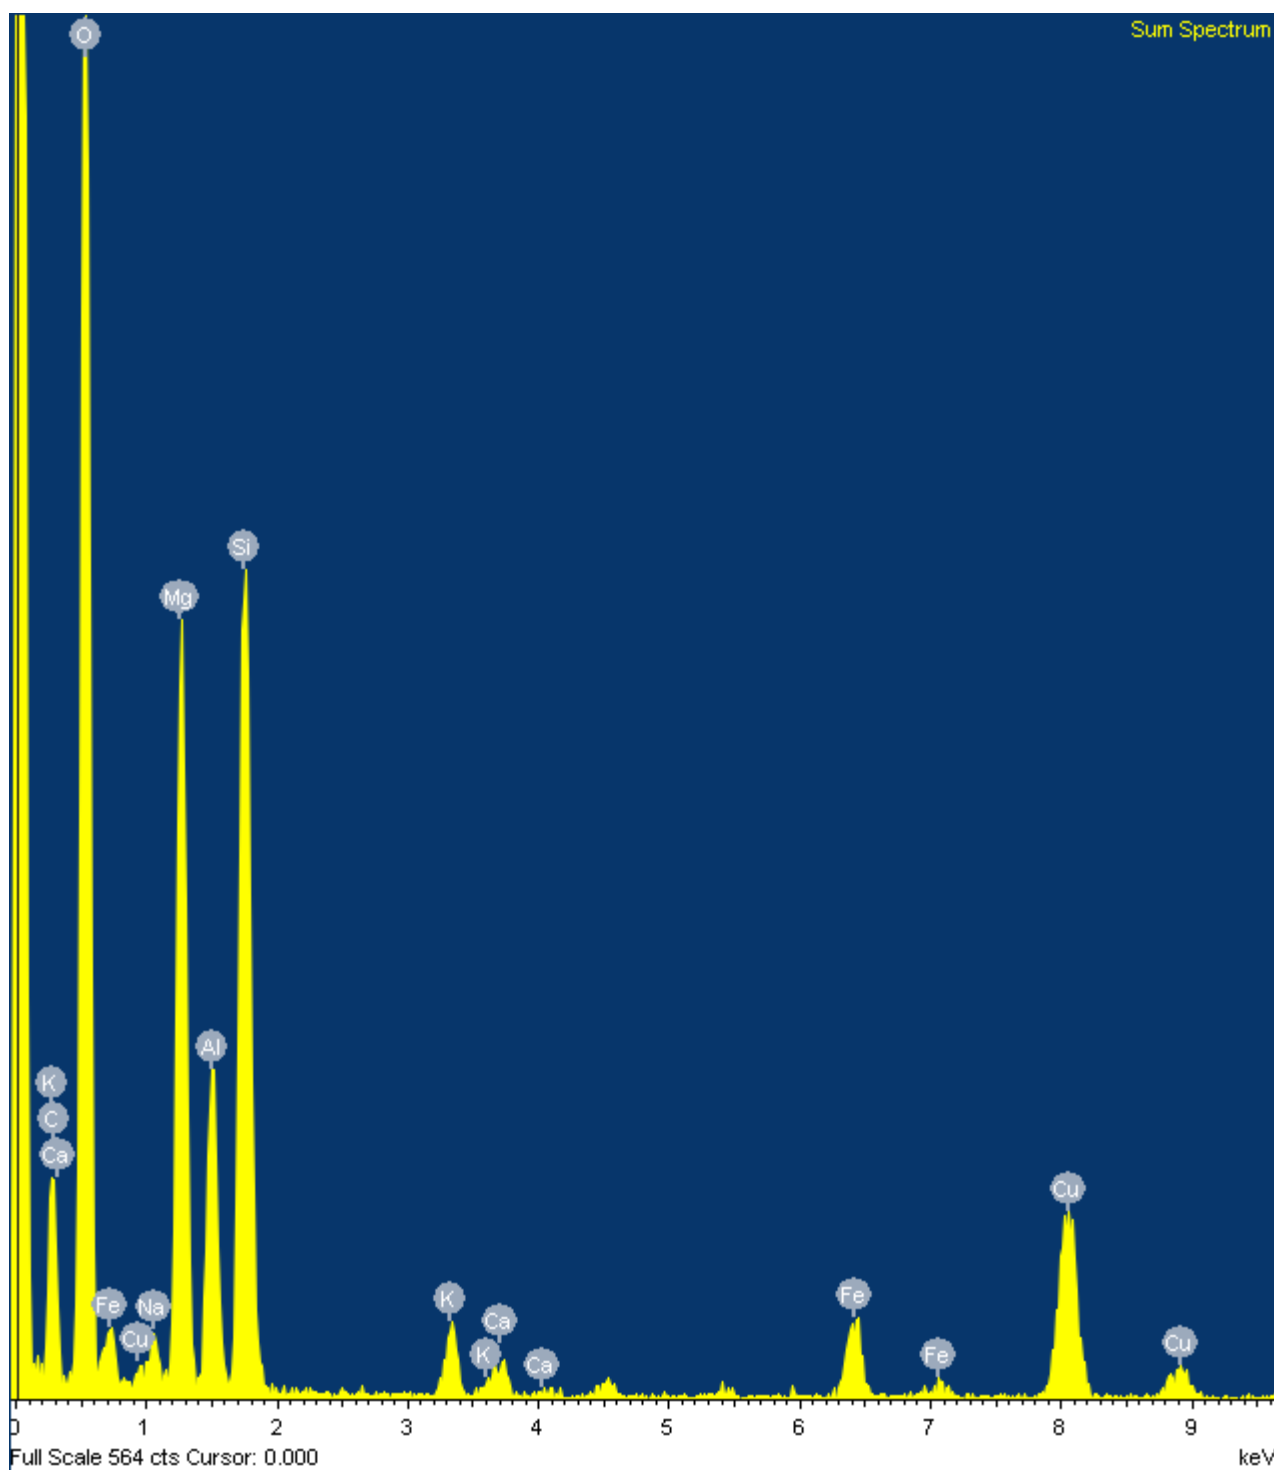

Comment:

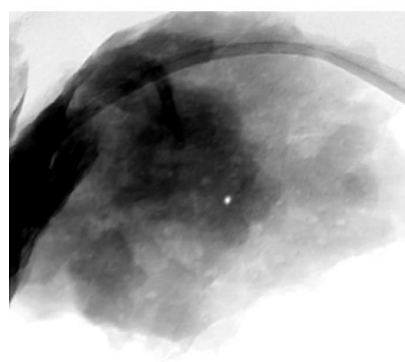

100nm

Electron Image 1

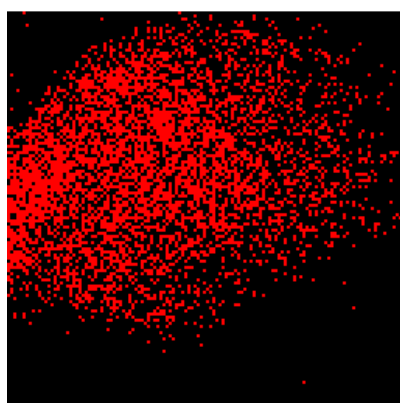

100nm

O Ka1

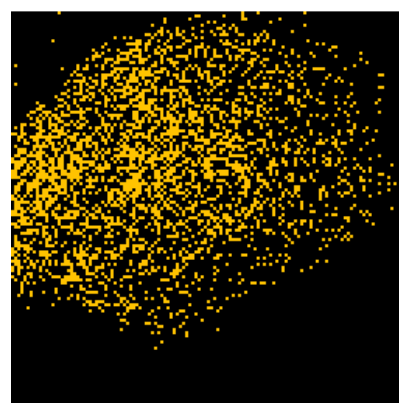

100nm

Mg Ka1\_2

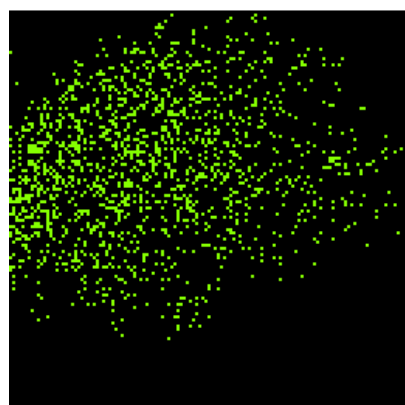

100nm

Al Ka1

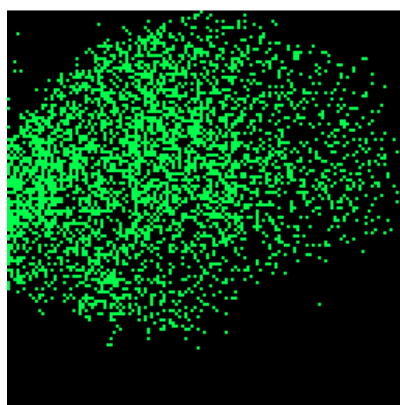

100nm

Si Ka1

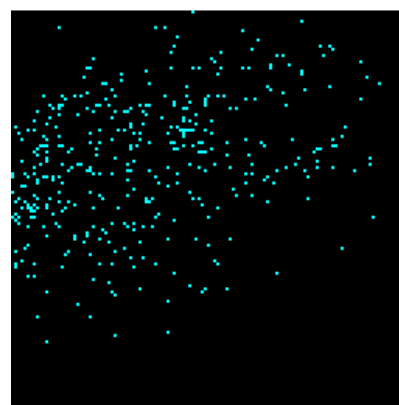

100nm

K Ka1

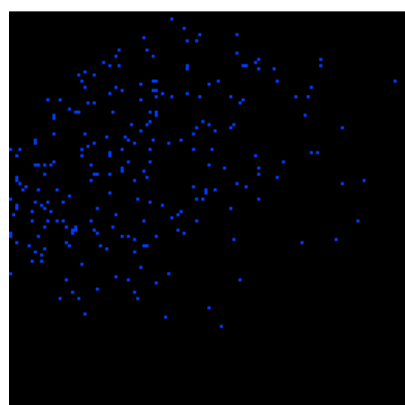

100nm

Ca Ka1

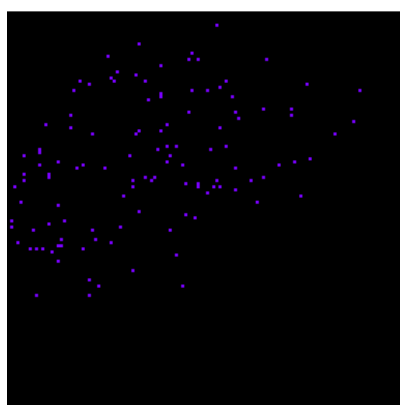

100nm

Ti Ka1

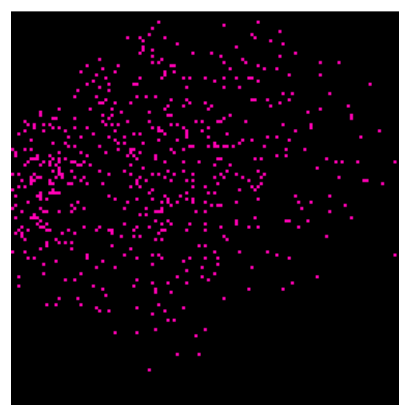

100nm

Fe Ka1

Comment:

Project: Project 1

Owner: INCA

Sample: CHG-4E-MW-No

Type: Default

| Element | Peak | Area  | k      | Abs    | Weight% | Weight% | Atomic% |
|---------|------|-------|--------|--------|---------|---------|---------|
|         | Area | Sigma | factor | Corrn. |         | Sigma   |         |
| O K     | 8621 | 173   | 1.065  | 1.000  | 50.16   | 0.62    | 63.77   |
| Mg K    | 5073 | 124   | 0.606  | 1.000  | 16.79   | 0.39    | 14.05   |
| Al K    | 2106 | 92    | 0.589  | 1.000  | 6.78    | 0.29    | 5.11    |
| Si K    | 6284 | 141   | 0.569  | 1.000  | 19.54   | 0.42    | 14.15   |
| K K     | 656  | 49    | 0.552  | 1.000  | 1.98    | 0.15    | 1.03    |
| Ca K    | 311  | 39    | 0.542  | 1.000  | 0.92    | 0.11    | 0.47    |
| Ti K    | 133  | 29    | 0.608  | 1.000  | 0.44    | 0.10    | 0.19    |
| Fe K    | 913  | 52    | 0.678  | 1.000  | 3.38    | 0.19    | 1.23    |
| Totals  |      |       |        |        | 100.00  |         |         |

Project: Project 1

Owner: INCA

Sample: CHG-4E-MW-No

Type: Default

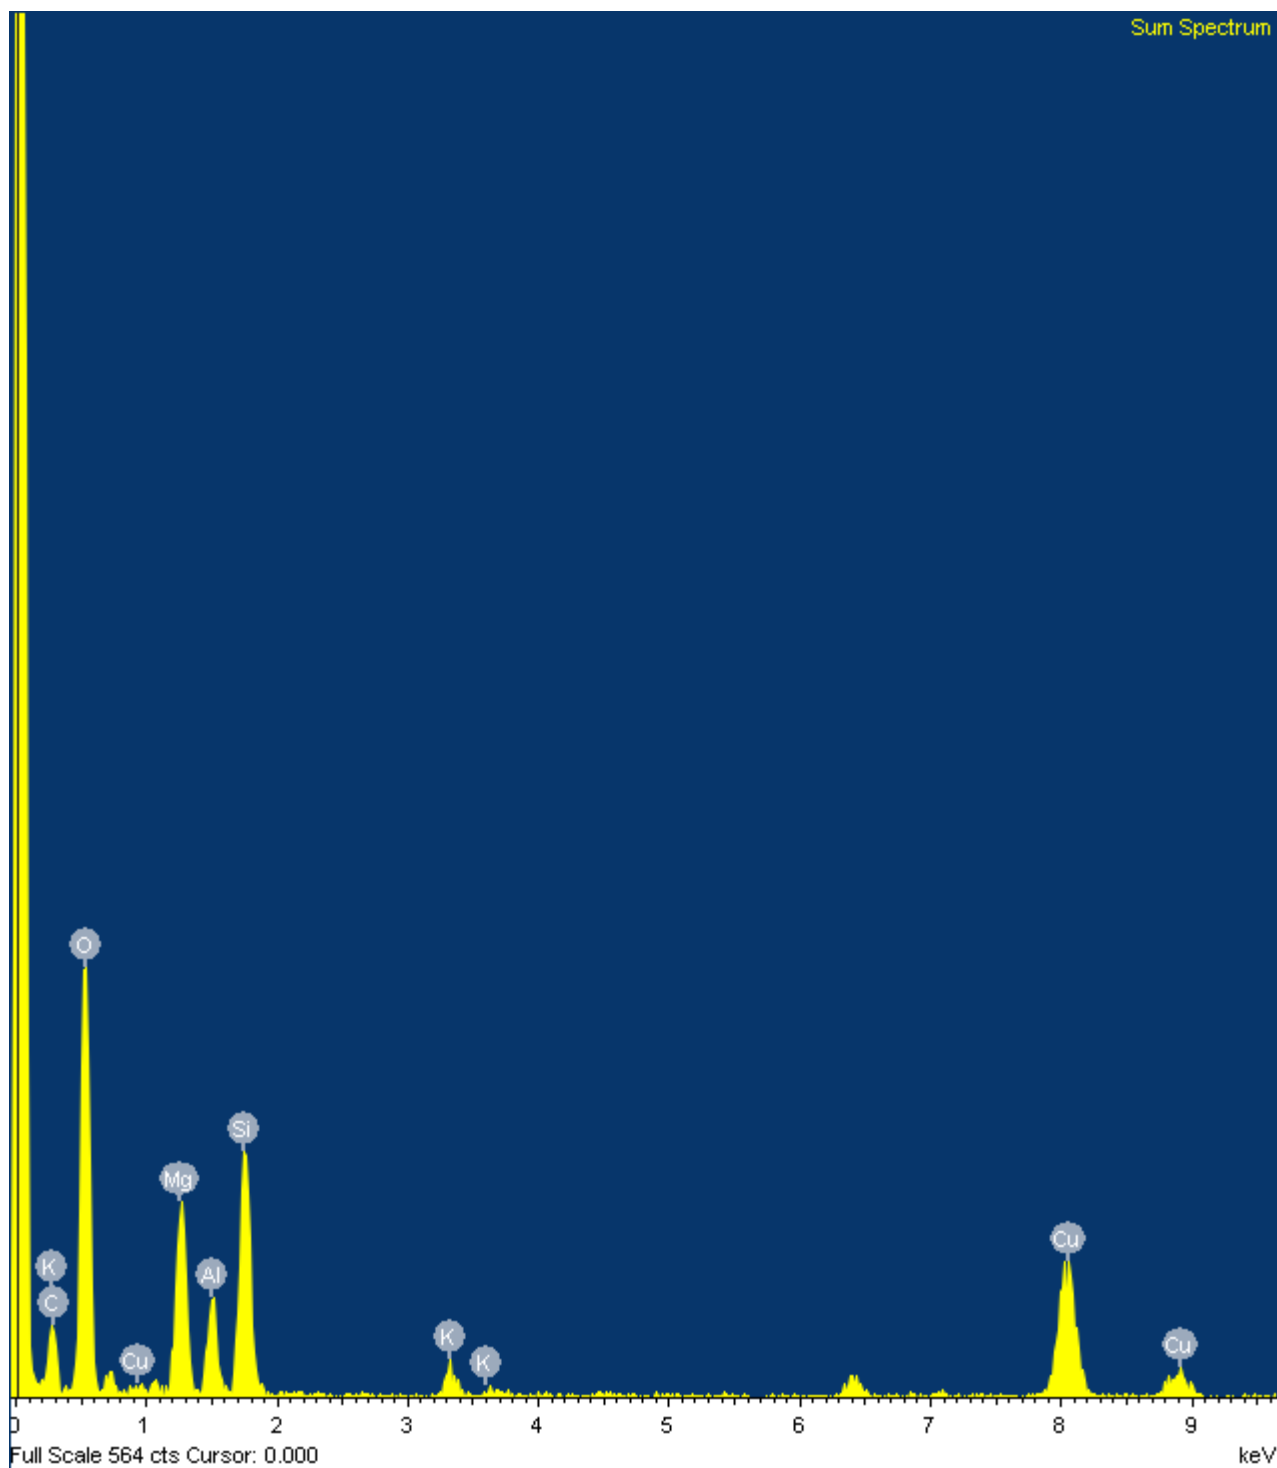

Comment:



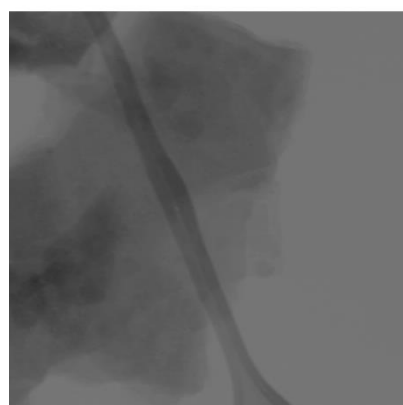

300nm Electron Image 1

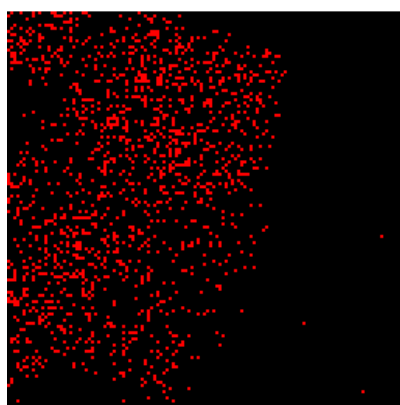

300nm O Ka1

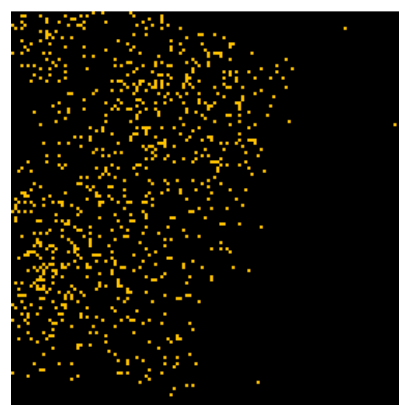

300nm Mg Ka1\_2

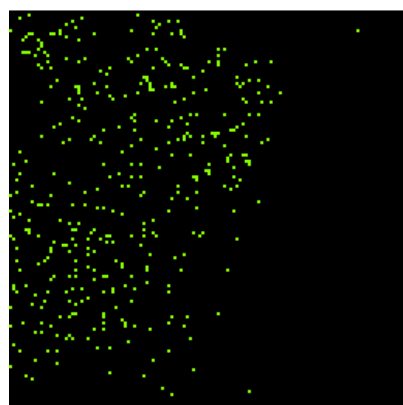

300nm Al Ka1

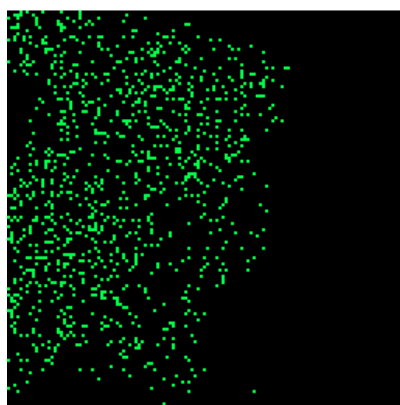

300nm Si Ka1

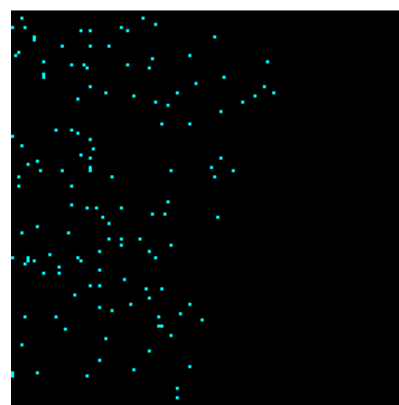

300nm K Ka1

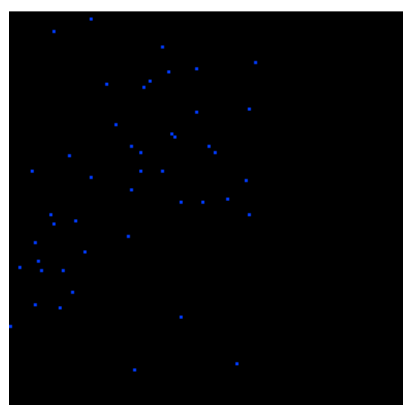

300nm Ca Ka1

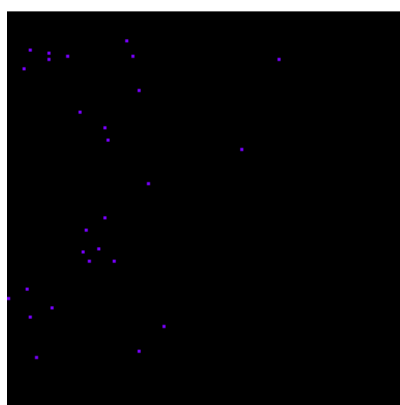

300nm Ti Ka1

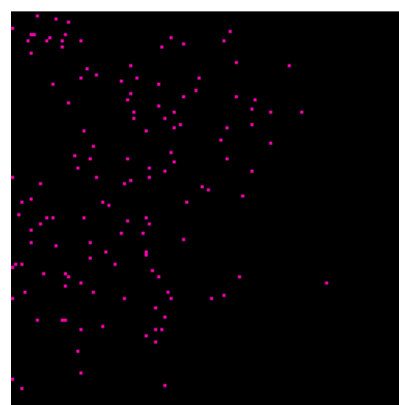

300nm Fe Ka1

Comment:

Project: Project 1

Owner: INCA

Sample: CHG-4E-MW-No

Type: Default

| Element | Peak | Area  | k      | Abs    | Weight% | Weight% | Atomic% |
|---------|------|-------|--------|--------|---------|---------|---------|
|         | Area | Sigma | factor | Corrn. |         | Sigma   |         |
| O K     | 2620 | 98    | 1.065  | 1.000  | 53.26   | 1.17    | 66.56   |
| Mg K    | 1254 | 64    | 0.606  | 1.000  | 14.49   | 0.71    | 11.92   |
| Al K    | 574  | 47    | 0.589  | 1.000  | 6.46    | 0.52    | 4.79    |
| Si K    | 1835 | 74    | 0.569  | 1.000  | 19.94   | 0.79    | 14.19   |
| K K     | 212  | 28    | 0.552  | 1.000  | 2.24    | 0.29    | 1.14    |
| Ca K    | 52   | 19    | 0.542  | 1.000  | 0.54    | 0.20    | 0.27    |
| Ti K    | 33   | 16    | 0.608  | 1.000  | 0.38    | 0.19    | 0.16    |
| Fe K    | 208  | 27    | 0.678  | 1.000  | 2.69    | 0.35    | 0.96    |
| Totals  |      |       |        |        | 100.00  |         |         |
